# Supplementary material for: Neural signatures of syntactic variation in speech planning
Source: PubMed Central journal article supplement (PMC7837500; doi:10.1371/journal.pbio.3001038), 2021-01-26
Supplement: pbio.3001038.s007.pdf [file pbio.3001038.s007.pdf]

| Experimental group    | Operation span | Symmetry span | Flanker congruency effect |
|-----------------------|----------------|---------------|---------------------------|
| Aligned condition     | 45.84 (4.20)   | 21.60 (4.07)  | 78.69 (71.48)             |
| Non-aligned condition | 44.08 (5.13)   | 21.76 (4.52)  | 64.97 (34.75)             |

Table S2: Mean partial-credit load scores for automated complex span tasks and mean congruency effect for Flanker task (standard deviations in parentheses). (Underlying data and scripts used to generate graphs are available from <https://osf.io/uhtcn/>.)
