# Supplementary material for: Neural signatures of syntactic variation in speech planning
Source: PubMed Central journal article supplement (PMC7837500; doi:10.1371/journal.pbio.3001038), 2021-01-26
Supplement: pbio.3001038.s008.pdf [file pbio.3001038.s008.pdf]

| Speech onset latencies                             |                                                                                                                                                                                                            |          |          |          |
|----------------------------------------------------|------------------------------------------------------------------------------------------------------------------------------------------------------------------------------------------------------------|----------|----------|----------|
|                                                    | dependent variable: speech onset latency (in ms);<br>random intercept and random slope for sentence<br>transitivity by participant and random intercept<br>and random slope for aspect by stimulus picture |          |          |          |
|                                                    | Estimate                                                                                                                                                                                                   | <i>t</i> | $\chi^2$ | <i>p</i> |
| Intercept                                          | 0.474                                                                                                                                                                                                      | 21.703   |          |          |
| Alignment Condition (= non-aligned)                | -0.039                                                                                                                                                                                                     | 1.517    | 2.190    | 0.139    |
| Sentence Transitivity (= transitive)               | -0.031                                                                                                                                                                                                     | 1.235    | 1.007    | 0.316    |
| Alignment Condition $\times$ Sentence Transitivity | 0.016                                                                                                                                                                                                      | 0.946    | 0.885    | 0.347    |
| Agent NP Length (standardized)                     | > -0.001                                                                                                                                                                                                   | 0.066    |          |          |
| Trial Number (standardized)                        | -0.006                                                                                                                                                                                                     | 3.772    |          |          |
| Verb Codability ( <i>H</i> standardized)           | -0.017                                                                                                                                                                                                     | 1.601    |          |          |
| Visual Picture Complexity (standardized)           | -0.002                                                                                                                                                                                                     | 0.260    |          |          |

Table S3: Generalized Gamma linear mixed effects regression results modeling speech onset latencies (inverse link function). Statistical significance of predictors was assessed using likelihood ratio tests; significance was only assessed for the predictors of interest (sentence transitivity and alignment condition). (Underlying data, scripts and models are available from <https://osf.io/uhtcn/>.)
