# Supplementary material for: Neural signatures of syntactic variation in speech planning
Source: PubMed Central journal article supplement (PMC7837500; doi:10.1371/journal.pbio.3001038), 2021-01-26
Supplement: pbio.3001038.s009.pdf [file pbio.3001038.s009.pdf]

| Agent fixations, 200–800 ms relative to picture onset  |                                                                               |         |          |          |
|--------------------------------------------------------|-------------------------------------------------------------------------------|---------|----------|----------|
|                                                        | dependent variable: log odds of fixating on agent character (hits vs. misses) |         |          |          |
|                                                        | Estimate                                                                      | z       | $\chi^2$ | <i>p</i> |
| Intercept                                              | 0.693                                                                         | 3.362   |          |          |
| Linear Time (Time <sup>1</sup> )                       | −1.387                                                                        | 3.854   |          |          |
| Quadratic Time (Time <sup>2</sup> )                    | 0.455                                                                         | 1.731   |          |          |
| Cubic Time (Time <sup>3</sup> )                        | −0.489                                                                        | 2.272   |          |          |
| Alignment (= non-aligned)                              | 0.041                                                                         | 0.397   | 0.191    | 0.662    |
| Alignment × Time <sup>1</sup>                          | −0.042                                                                        | 0.158   | 0.016    | 0.899    |
| Alignment × Time <sup>2</sup>                          | −0.438                                                                        | 1.841   | 3.109    | 0.078    |
| Alignment × Time <sup>3</sup>                          | 1.133                                                                         | 4.442   | 16.817   | < 0.001  |
| Speech Onset (standardized)                            | −0.005                                                                        | 0.532   |          |          |
| Speech Onset × Time <sup>1</sup>                       | 0.015                                                                         | 0.612   |          |          |
| Speech Onset × Time <sup>2</sup>                       | −0.009                                                                        | 0.382   |          |          |
| Speech Onset × Time <sup>3</sup>                       | 0.140                                                                         | 5.572   |          |          |
| Agent NP Length (standardized)                         | −0.053                                                                        | 4.875   |          |          |
| Agent NP Length × Time <sup>1</sup>                    | 0.065                                                                         | 2.678   |          |          |
| Agent NP Length × Time <sup>2</sup>                    | 0.069                                                                         | 2.748   |          |          |
| Agent NP Length × Time <sup>3</sup>                    | −0.091                                                                        | 3.494   |          |          |
| Trial Number (standardized)                            | −0.078                                                                        | 10.899  |          |          |
| Trial Number × Time <sup>1</sup>                       | −0.064                                                                        | 3.932   |          |          |
| Trial Number × Time <sup>2</sup>                       | 0.004                                                                         | 0.222   |          |          |
| Trial Number × Time <sup>3</sup>                       | −0.006                                                                        | 0.335   |          |          |
| Size Agent AOI (standardized)                          | 0.288                                                                         | 2.592   |          |          |
| Size Patient AOI (standardized)                        | −0.443                                                                        | 3.956   |          |          |
| Agent Humanness (= non-human)                          | −0.498                                                                        | 2.129   |          |          |
| Agent Codability ( <i>H</i> standardized)              | −0.021                                                                        | 0.194   |          |          |
| Verb Codability ( <i>H</i> standardized)               | 0.191                                                                         | 1.446   |          |          |
| Visual Picture Complexity (standardized)               | 0.038                                                                         | 0.321   |          |          |
| Autocorrelation at Lag = 1 (agent successes, centered) | 0.191                                                                         | 194.607 |          |          |

Table S4: Generalized (binomial) linear mixed effects regression results modeling fixations on agent characters (successes) vs. fixations elsewhere in the pictures (failures) between 200 and 800 ms relative to picture stimulus onset. Statistical significance of predictors was assessed using likelihood ratio tests; significance was only assessed for predictors of interest. (Underlying data, scripts and models are available from <https://osf.io/uhtcn/>.)
