# Supplementary material for: Neural signatures of syntactic variation in speech planning
Source: PLoS Biol. 2021 Jan 26;19(1):e3001038. doi: 10.1371/journal.pbio.3001038 (PMC7837500; doi:10.1371/journal.pbio.3001038)
Supplement: S1 Data — (XLSX) [file pbio.3001038.s013.xlsx]

## Sheet: Fig 2A
Fig 2A: By-participant means (proportion of fixations to AOIs)
time	aspect	Subject	A_looks_mean	P_looks_mean
4	imperfective	10	0	0
4	imperfective	12	0	0
4	imperfective	14	0	0
4	imperfective	16	0	0
4	imperfective	18	0	0
4	imperfective	2	0	0
4	imperfective	20	0	0
4	imperfective	22	0	0
4	imperfective	24	0	0
4	imperfective	26	0	0
4	imperfective	28	0	0
4	imperfective	30	0	0
4	imperfective	32	0	0
4	imperfective	34	0	0
4	imperfective	36	0	0
4	imperfective	38	0	0
4	imperfective	4	0	0
4	imperfective	40	0	0
4	imperfective	42	0	0
4	imperfective	44	0	0
4	imperfective	46	0	0
4	imperfective	48	0	0
4	imperfective	50	0	0
4	imperfective	6	0	0
4	imperfective	8	0	0
4	perfective	1	0	0
4	perfective	11	0	0
4	perfective	13	0	0
4	perfective	15	0	0
4	perfective	17	0	0
4	perfective	19	0	0
4	perfective	21	0	0
4	perfective	23	0	0
4	perfective	24	0	0
4	perfective	25	0	0
4	perfective	27	0	0
4	perfective	29	0	0
4	perfective	3	0	0
4	perfective	31	0	0
4	perfective	33	0	0
4	perfective	35	0	0
4	perfective	37	0	0
4	perfective	39	0	0
4	perfective	4	0	0
4	perfective	41	0	0
4	perfective	43	0	0
4	perfective	45	0	0
4	perfective	47	0	0
4	perfective	49	0	0
4	perfective	5	0	0
4	perfective	7	0	0
4	perfective	8	0	0
4	perfective	9	0	0
8	imperfective	10	0	0
8	imperfective	12	0	0
8	imperfective	14	0	0
8	imperfective	16	0	0
8	imperfective	18	0	0
8	imperfective	2	0	0
8	imperfective	20	0	0
8	imperfective	22	0	0
8	imperfective	24	0	0
8	imperfective	26	0	0
8	imperfective	28	0	0
8	imperfective	30	0	0
8	imperfective	32	0	0
8	imperfective	34	0	0
8	imperfective	36	0	0
8	imperfective	38	0	0
8	imperfective	4	0	0
8	imperfective	40	0	0
8	imperfective	42	0	0
8	imperfective	44	0	0
8	imperfective	46	0	0
8	imperfective	48	0	0
8	imperfective	50	0	0
8	imperfective	6	0	0
8	imperfective	8	0	0
8	perfective	1	0	0
8	perfective	11	0	0
8	perfective	13	0	0
8	perfective	15	0	0
8	perfective	17	0	0
8	perfective	19	0	0
8	perfective	21	0	0
8	perfective	23	0	0
8	perfective	24	0	0
8	perfective	25	0	0
8	perfective	27	0	0
8	perfective	29	0	0
8	perfective	3	0	0
8	perfective	31	0	0
8	perfective	33	0	0
8	perfective	35	0	0
8	perfective	37	0	0
8	perfective	39	0	0
8	perfective	4	0	0
8	perfective	41	0	0
8	perfective	43	0	0
8	perfective	45	0	0
8	perfective	47	0	0
8	perfective	49	0	0
8	perfective	5	0	0
8	perfective	7	0	0
8	perfective	8	0	0
8	perfective	9	0	0
12	imperfective	10	0	0
12	imperfective	12	0	0
12	imperfective	14	0	0
12	imperfective	16	0	0
12	imperfective	18	0	0
12	imperfective	2	0	0
12	imperfective	20	0	0
12	imperfective	22	0	0
12	imperfective	24	0	0
12	imperfective	26	0	0
12	imperfective	28	0	0
12	imperfective	30	0	0
12	imperfective	32	0	0
12	imperfective	34	0	0
12	imperfective	36	0	0
12	imperfective	38	0	0
12	imperfective	4	0	0
12	imperfective	40	0	0
12	imperfective	42	0	0
12	imperfective	44	0	0
12	imperfective	46	0	0
12	imperfective	48	0	0
12	imperfective	50	0	0
12	imperfective	6	0	0
12	imperfective	8	0	0
12	perfective	1	0	0
12	perfective	11	0	0
12	perfective	13	0	0
12	perfective	15	0	0
12	perfective	17	0	0
12	perfective	19	0	0
12	perfective	21	0	0
12	perfective	23	0	0
12	perfective	24	0	0
12	perfective	25	0	0
12	perfective	27	0	0
12	perfective	29	0	0
12	perfective	3	0	0
12	perfective	31	0	0
12	perfective	33	0	0
12	perfective	35	0	0
12	perfective	37	0	0
12	perfective	39	0	0
12	perfective	4	0	0
12	perfective	41	0	0
12	perfective	43	0	0
12	perfective	45	0	0
12	perfective	47	0	0
12	perfective	49	0	0
12	perfective	5	0	0
12	perfective	7	0	0
12	perfective	8	0	0
12	perfective	9	0	0
16	imperfective	10	0	0
16	imperfective	12	0	0
16	imperfective	14	0	0
16	imperfective	16	0	0
16	imperfective	18	0	0
16	imperfective	2	0	0
16	imperfective	20	0	0
16	imperfective	22	0	0
16	imperfective	24	0	0
16	imperfective	26	0	0
16	imperfective	28	0	0
16	imperfective	30	0	0
16	imperfective	32	0	0
16	imperfective	34	0	0
16	imperfective	36	0	0
16	imperfective	38	0	0
16	imperfective	4	0	0
16	imperfective	40	0	0
16	imperfective	42	0	0
16	imperfective	44	0	0
16	imperfective	46	0	0
16	imperfective	48	0	0
16	imperfective	50	0	0
16	imperfective	6	0	0
16	imperfective	8	0	0
16	perfective	1	0	0
16	perfective	11	0	0
16	perfective	13	0	0
16	perfective	15	0	0
16	perfective	17	0	0
16	perfective	19	0	0
16	perfective	21	0	0
16	perfective	23	0	0
16	perfective	24	0	0
16	perfective	25	0	0
16	perfective	27	0	0
16	perfective	29	0	0
16	perfective	3	0	0
16	perfective	31	0	0
16	perfective	33	0	0
16	perfective	35	0	0
16	perfective	37	0	0
16	perfective	39	0	0
16	perfective	4	0	0
16	perfective	41	0	0
16	perfective	43	0	0
16	perfective	45	0	0
16	perfective	47	0	0
16	perfective	49	0	0
16	perfective	5	0	0
16	perfective	7	0	0
16	perfective	8	0	0
16	perfective	9	0	0
20	imperfective	10	0	0
20	imperfective	12	0	0
20	imperfective	14	0	0
20	imperfective	16	0	0
20	imperfective	18	0	0
20	imperfective	2	0	0
20	imperfective	20	0	0
20	imperfective	22	0	0
20	imperfective	24	0	0
20	imperfective	26	0	0
20	imperfective	28	0	0
20	imperfective	30	0	0
20	imperfective	32	0	0
20	imperfective	34	0	0
20	imperfective	36	0	0
20	imperfective	38	0	0
20	imperfective	4	0	0
20	imperfective	40	0	0
20	imperfective	42	0	0
20	imperfective	44	0	0
20	imperfective	46	0	0
20	imperfective	48	0	0
20	imperfective	50	0	0
20	imperfective	6	0	0
20	imperfective	8	0	0
20	perfective	1	0	0
20	perfective	11	0	0
20	perfective	13	0	0
20	perfective	15	0	0
20	perfective	17	0	0
20	perfective	19	0	0
20	perfective	21	0	0
20	perfective	23	0	0
20	perfective	24	0	0
20	perfective	25	0	0
20	perfective	27	0	0
20	perfective	29	0	0
20	perfective	3	0	0
20	perfective	31	0	0
20	perfective	33	0	0
20	perfective	35	0	0
20	perfective	37	0	0
20	perfective	39	0	0
20	perfective	4	0	0
20	perfective	41	0	0
20	perfective	43	0	0
20	perfective	45	0	0
20	perfective	47	0	0
20	perfective	49	0	0
20	perfective	5	0	0
20	perfective	7	0	0
20	perfective	8	0	0
20	perfective	9	0	0
24	imperfective	10	0	0
24	imperfective	12	0	0
24	imperfective	14	0	0
24	imperfective	16	0	0
24	imperfective	18	0	0
24	imperfective	2	0	0
24	imperfective	20	0	0
24	imperfective	22	0	0
24	imperfective	24	0	0
24	imperfective	26	0	0
24	imperfective	28	0	0
24	imperfective	30	0	0
24	imperfective	32	0	0
24	imperfective	34	0	0
24	imperfective	36	0	0
24	imperfective	38	0	0
24	imperfective	4	0	0
24	imperfective	40	0	0
24	imperfective	42	0	0
24	imperfective	44	0	0
24	imperfective	46	0	0
24	imperfective	48	0	0
24	imperfective	50	0	0
24	imperfective	6	0	0
24	imperfective	8	0	0
24	perfective	1	0	0
24	perfective	11	0	0
24	perfective	13	0	0
24	perfective	15	0	0
24	perfective	17	0	0
24	perfective	19	0	0
24	perfective	21	0	0
24	perfective	23	0	0
24	perfective	24	0	0
24	perfective	25	0	0
24	perfective	27	0	0
24	perfective	29	0	0
24	perfective	3	0	0
24	perfective	31	0	0
24	perfective	33	0	0
24	perfective	35	0	0
24	perfective	37	0	0
24	perfective	39	0	0
24	perfective	4	0	0
24	perfective	41	0	0
24	perfective	43	0	0
24	perfective	45	0	0
24	perfective	47	0	0
24	perfective	49	0	0
24	perfective	5	0	0
24	perfective	7	0	0
24	perfective	8	0	0
24	perfective	9	0	0
28	imperfective	10	0	0
28	imperfective	12	0	0
28	imperfective	14	0	0
28	imperfective	16	0	0
28	imperfective	18	0	0
28	imperfective	2	0	0
28	imperfective	20	0	0
28	imperfective	22	0	0
28	imperfective	24	0	0
28	imperfective	26	0	0
28	imperfective	28	0	0
28	imperfective	30	0	0
28	imperfective	32	0	0
28	imperfective	34	0	0
28	imperfective	36	0	0
28	imperfective	38	0	0
28	imperfective	4	0	0
28	imperfective	40	0	0
28	imperfective	42	0	0
28	imperfective	44	0	0
28	imperfective	46	0	0
28	imperfective	48	0	0
28	imperfective	50	0	0
28	imperfective	6	0	0
28	imperfective	8	0	0
28	perfective	1	0	0
28	perfective	11	0	0
28	perfective	13	0	0
28	perfective	15	0	0
28	perfective	17	0	0
28	perfective	19	0	0
28	perfective	21	0	0
28	perfective	23	0	0
28	perfective	24	0	0
28	perfective	25	0	0
28	perfective	27	0	0
28	perfective	29	0	0
28	perfective	3	0	0
28	perfective	31	0	0
28	perfective	33	0	0
28	perfective	35	0	0
28	perfective	37	0	0
28	perfective	39	0	0
28	perfective	4	0	0
28	perfective	41	0	0
28	perfective	43	0	0
28	perfective	45	0	0
28	perfective	47	0	0
28	perfective	49	0	0
28	perfective	5	0	0
28	perfective	7	0	0
28	perfective	8	0	0
28	perfective	9	0	0
32	imperfective	10	0	0
32	imperfective	12	0	0
32	imperfective	14	0	0
32	imperfective	16	0	0
32	imperfective	18	0	0
32	imperfective	2	0	0
32	imperfective	20	0	0
32	imperfective	22	0	0
32	imperfective	24	0	0
32	imperfective	26	0	0
32	imperfective	28	0	0
32	imperfective	30	0	0
32	imperfective	32	0	0
32	imperfective	34	0	0
32	imperfective	36	0	0
32	imperfective	38	0	0
32	imperfective	4	0	0
32	imperfective	40	0	0
32	imperfective	42	0	0
32	imperfective	44	0	0
32	imperfective	46	0	0
32	imperfective	48	0	0
32	imperfective	50	0	0
32	imperfective	6	0	0
32	imperfective	8	0	0
32	perfective	1	0	0
32	perfective	11	0	0
32	perfective	13	0	0
32	perfective	15	0	0
32	perfective	17	0	0
32	perfective	19	0	0
32	perfective	21	0	0
32	perfective	23	0	0
32	perfective	24	0	0
32	perfective	25	0	0
32	perfective	27	0	0
32	perfective	29	0	0
32	perfective	3	0	0
32	perfective	31	0	0
32	perfective	33	0	0
32	perfective	35	0	0
32	perfective	37	0	0
32	perfective	39	0	0
32	perfective	4	0	0
32	perfective	41	0	0
32	perfective	43	0	0
32	perfective	45	0	0
32	perfective	47	0	0
32	perfective	49	0	0
32	perfective	5	0	0
32	perfective	7	0	0
32	perfective	8	0	0
32	perfective	9	0	0
36	imperfective	10	0	0
36	imperfective	12	0	0
36	imperfective	14	0	0
36	imperfective	16	0	0
36	imperfective	18	0	0
36	imperfective	2	0	0
36	imperfective	20	0	0
36	imperfective	22	0	0
36	imperfective	24	0	0
36	imperfective	26	0	0
36	imperfective	28	0	0
36	imperfective	30	0	0
36	imperfective	32	0	0
36	imperfective	34	0	0
36	imperfective	36	0	0
36	imperfective	38	0	0
36	imperfective	4	0	0
36	imperfective	40	0	0
36	imperfective	42	0	0
36	imperfective	44	0	0
36	imperfective	46	0	0
36	imperfective	48	0	0
36	imperfective	50	0	0
36	imperfective	6	0	0
36	imperfective	8	0	0
36	perfective	1	0	0
36	perfective	11	0	0
36	perfective	13	0	0
36	perfective	15	0	0
36	perfective	17	0	0
36	perfective	19	0	0
36	perfective	21	0	0
36	perfective	23	0	0
36	perfective	24	0	0
36	perfective	25	0	0
36	perfective	27	0	0
36	perfective	29	0	0
36	perfective	3	0	0
36	perfective	31	0	0
36	perfective	33	0	0
36	perfective	35	0	0
36	perfective	37	0	0
36	perfective	39	0	0
36	perfective	4	0	0
36	perfective	41	0	0
36	perfective	43	0	0
36	perfective	45	0	0
36	perfective	47	0	0
36	perfective	49	0	0
36	perfective	5	0	0
36	perfective	7	0	0
36	perfective	8	0	0
36	perfective	9	0	0
40	imperfective	10	0	0
40	imperfective	12	0	0
40	imperfective	14	0	0
40	imperfective	16	0	0
40	imperfective	18	0	0
40	imperfective	2	0	0
40	imperfective	20	0	0
40	imperfective	22	0	0
40	imperfective	24	0	0
40	imperfective	26	0	0
40	imperfective	28	0	0
40	imperfective	30	0	0
40	imperfective	32	0	0
40	imperfective	34	0	0
40	imperfective	36	0	0
40	imperfective	38	0	0
40	imperfective	4	0	0
40	imperfective	40	0	0
40	imperfective	42	0	0
40	imperfective	44	0	0
40	imperfective	46	0	0
40	imperfective	48	0	0
40	imperfective	50	0	0
40	imperfective	6	0	0
40	imperfective	8	0	0
40	perfective	1	0	0
40	perfective	11	0	0
40	perfective	13	0	0
40	perfective	15	0	0
40	perfective	17	0	0
40	perfective	19	0	0
40	perfective	21	0	0
40	perfective	23	0	0
40	perfective	24	0	0
40	perfective	25	0	0
40	perfective	27	0	0
40	perfective	29	0	0
40	perfective	3	0	0
40	perfective	31	0	0
40	perfective	33	0	0
40	perfective	35	0	0
40	perfective	37	0	0
40	perfective	39	0	0
40	perfective	4	0	0
40	perfective	41	0	0
40	perfective	43	0	0
40	perfective	45	0	0
40	perfective	47	0	0
40	perfective	49	0	0
40	perfective	5	0	0
40	perfective	7	0	0
40	perfective	8	0	0
40	perfective	9	0	0
44	imperfective	10	0	0
44	imperfective	12	0	0
44	imperfective	14	0	0
44	imperfective	16	0	0
44	imperfective	18	0	0
44	imperfective	2	0	0
44	imperfective	20	0	0
44	imperfective	22	0	0
44	imperfective	24	0	0
44	imperfective	26	0	0
44	imperfective	28	0	0
44	imperfective	30	0	0
44	imperfective	32	0	0
44	imperfective	34	0	0
44	imperfective	36	0	0
44	imperfective	38	0	0
44	imperfective	4	0	0
44	imperfective	40	0	0
44	imperfective	42	0	0
44	imperfective	44	0	0
44	imperfective	46	0	0
44	imperfective	48	0	0
44	imperfective	50	0	0
44	imperfective	6	0	0
44	imperfective	8	0	0
44	perfective	1	0	0
44	perfective	11	0	0
44	perfective	13	0	0
44	perfective	15	0	0
44	perfective	17	0	0
44	perfective	19	0	0
44	perfective	21	0	0
44	perfective	23	0	0
44	perfective	24	0	0
44	perfective	25	0	0
44	perfective	27	0	0
44	perfective	29	0	0
44	perfective	3	0	0
44	perfective	31	0	0
44	perfective	33	0	0
44	perfective	35	0	0
44	perfective	37	0	0
44	perfective	39	0	0
44	perfective	4	0	0
44	perfective	41	0	0
44	perfective	43	0	0
44	perfective	45	0	0
44	perfective	47	0	0
44	perfective	49	0	0
44	perfective	5	0	0
44	perfective	7	0	0
44	perfective	8	0	0
44	perfective	9	0	0
48	imperfective	10	0	0
48	imperfective	12	0	0
48	imperfective	14	0	0
48	imperfective	16	0	0
48	imperfective	18	0	0
48	imperfective	2	0	0
48	imperfective	20	0	0
48	imperfective	22	0	0
48	imperfective	24	0	0
48	imperfective	26	0	0
48	imperfective	28	0	0
48	imperfective	30	0	0
48	imperfective	32	0	0
48	imperfective	34	0	0
48	imperfective	36	0	0
48	imperfective	38	0	0
48	imperfective	4	0	0
48	imperfective	40	0	0
48	imperfective	42	0	0
48	imperfective	44	0	0
48	imperfective	46	0	0
48	imperfective	48	0	0
48	imperfective	50	0	0
48	imperfective	6	0	0
48	imperfective	8	0	0
48	perfective	1	0	0
48	perfective	11	0	0
48	perfective	13	0	0
48	perfective	15	0	0
48	perfective	17	0	0
48	perfective	19	0	0
48	perfective	21	0	0
48	perfective	23	0	0
48	perfective	24	0	0
48	perfective	25	0	0
48	perfective	27	0	0
48	perfective	29	0	0
48	perfective	3	0	0
48	perfective	31	0	0
48	perfective	33	0	0
48	perfective	35	0	0
48	perfective	37	0	0
48	perfective	39	0	0
48	perfective	4	0	0
48	perfective	41	0	0
48	perfective	43	0	0
48	perfective	45	0	0
48	perfective	47	0	0
48	perfective	49	0	0
48	perfective	5	0	0
48	perfective	7	0	0
48	perfective	8	0	0
48	perfective	9	0	0
52	imperfective	10	0	0
52	imperfective	12	0	0
52	imperfective	14	0	0
52	imperfective	16	0	0
52	imperfective	18	0	0
52	imperfective	2	0	0
52	imperfective	20	0	0
52	imperfective	22	0	0
52	imperfective	24	0	0
52	imperfective	26	0	0
52	imperfective	28	0	0
52	imperfective	30	0	0
52	imperfective	32	0	0
52	imperfective	34	0	0
52	imperfective	36	0	0
52	imperfective	38	0	0
52	imperfective	4	0	0
52	imperfective	40	0	0
52	imperfective	42	0	0
52	imperfective	44	0	0
52	imperfective	46	0	0
52	imperfective	48	0	0
52	imperfective	50	0	0
52	imperfective	6	0	0
52	imperfective	8	0	0
52	perfective	1	0	0
52	perfective	11	0	0
52	perfective	13	0	0
52	perfective	15	0	0
52	perfective	17	0	0
52	perfective	19	0	0
52	perfective	21	0	0
52	perfective	23	0	0
52	perfective	24	0	0
52	perfective	25	0	0
52	perfective	27	0	0
52	perfective	29	0	0
52	perfective	3	0	0
52	perfective	31	0	0
52	perfective	33	0	0
52	perfective	35	0	0
52	perfective	37	0	0
52	perfective	39	0	0
52	perfective	4	0	0
52	perfective	41	0	0
52	perfective	43	0	0
52	perfective	45	0	0
52	perfective	47	0	0
52	perfective	49	0	0
52	perfective	5	0	0
52	perfective	7	0	0
52	perfective	8	0	0
52	perfective	9	0	0
56	imperfective	10	0	0
56	imperfective	12	0	0
56	imperfective	14	0	0
56	imperfective	16	0	0
56	imperfective	18	0	0
56	imperfective	2	0	0
56	imperfective	20	0	0
56	imperfective	22	0	0
56	imperfective	24	0	0
56	imperfective	26	0	0
56	imperfective	28	0	0
56	imperfective	30	0	0
56	imperfective	32	0	0
56	imperfective	34	0	0
56	imperfective	36	0	0
56	imperfective	38	0	0
56	imperfective	4	0	0
56	imperfective	40	0	0
56	imperfective	42	0	0
56	imperfective	44	0	0
56	imperfective	46	0	0
56	imperfective	48	0	0
56	imperfective	50	0	0
56	imperfective	6	0	0
56	imperfective	8	0	0
56	perfective	1	0	0
56	perfective	11	0	0
56	perfective	13	0	0
56	perfective	15	0	0
56	perfective	17	0	0
56	perfective	19	0	0
56	perfective	21	0	0
56	perfective	23	0	0
56	perfective	24	0	0
56	perfective	25	0	0
56	perfective	27	0	0
56	perfective	29	0	0
56	perfective	3	0.0322581	0
56	perfective	31	0	0
56	perfective	33	0	0
56	perfective	35	0	0
56	perfective	37	0	0
56	perfective	39	0	0
56	perfective	4	0	0
56	perfective	41	0	0
56	perfective	43	0	0
56	perfective	45	0	0
56	perfective	47	0	0
56	perfective	49	0	0
56	perfective	5	0	0
56	perfective	7	0	0
56	perfective	8	0	0
56	perfective	9	0	0
60	imperfective	10	0.05	0
60	imperfective	12	0	0
60	imperfective	14	0	0
60	imperfective	16	0	0
60	imperfective	18	0	0
60	imperfective	2	0	0
60	imperfective	20	0	0
60	imperfective	22	0	0
60	imperfective	24	0	0
60	imperfective	26	0	0
60	imperfective	28	0	0
60	imperfective	30	0	0
60	imperfective	32	0	0
60	imperfective	34	0	0
60	imperfective	36	0	0
60	imperfective	38	0	0
60	imperfective	4	0	0
60	imperfective	40	0	0
60	imperfective	42	0	0
60	imperfective	44	0	0
60	imperfective	46	0	0
60	imperfective	48	0	0
60	imperfective	50	0	0
60	imperfective	6	0	0
60	imperfective	8	0	0
60	perfective	1	0	0
60	perfective	11	0	0
60	perfective	13	0	0
60	perfective	15	0	0
60	perfective	17	0	0
60	perfective	19	0	0
60	perfective	21	0	0
60	perfective	23	0	0
60	perfective	24	0	0
60	perfective	25	0	0
60	perfective	27	0	0
60	perfective	29	0	0
60	perfective	3	0.0322581	0
60	perfective	31	0	0
60	perfective	33	0	0
60	perfective	35	0	0
60	perfective	37	0	0
60	perfective	39	0	0
60	perfective	4	0	0
60	perfective	41	0	0
60	perfective	43	0	0
60	perfective	45	0	0
60	perfective	47	0	0
60	perfective	49	0	0
60	perfective	5	0	0
60	perfective	7	0	0
60	perfective	8	0	0
60	perfective	9	0	0
64	imperfective	10	0.05	0
64	imperfective	12	0	0
64	imperfective	14	0	0
64	imperfective	16	0	0
64	imperfective	18	0	0
64	imperfective	2	0	0
64	imperfective	20	0	0
64	imperfective	22	0	0
64	imperfective	24	0	0
64	imperfective	26	0	0
64	imperfective	28	0	0
64	imperfective	30	0	0
64	imperfective	32	0	0
64	imperfective	34	0	0
64	imperfective	36	0	0
64	imperfective	38	0	0
64	imperfective	4	0	0
64	imperfective	40	0	0
64	imperfective	42	0	0
64	imperfective	44	0	0
64	imperfective	46	0	0
64	imperfective	48	0	0
64	imperfective	50	0	0
64	imperfective	6	0	0
64	imperfective	8	0	0
64	perfective	1	0	0
64	perfective	11	0	0
64	perfective	13	0	0
64	perfective	15	0	0
64	perfective	17	0	0
64	perfective	19	0	0
64	perfective	21	0	0
64	perfective	23	0	0
64	perfective	24	0	0
64	perfective	25	0	0
64	perfective	27	0	0
64	perfective	29	0	0
64	perfective	3	0.0322581	0
64	perfective	31	0	0
64	perfective	33	0	0
64	perfective	35	0	0
64	perfective	37	0	0
64	perfective	39	0	0
64	perfective	4	0	0
64	perfective	41	0	0
64	perfective	43	0	0
64	perfective	45	0	0
64	perfective	47	0	0
64	perfective	49	0	0
64	perfective	5	0	0
64	perfective	7	0	0
64	perfective	8	0	0
64	perfective	9	0	0
68	imperfective	10	0.05	0
68	imperfective	12	0	0
68	imperfective	14	0	0
68	imperfective	16	0	0
68	imperfective	18	0	0
68	imperfective	2	0	0
68	imperfective	20	0.027027	0
68	imperfective	22	0	0
68	imperfective	24	0	0
68	imperfective	26	0	0
68	imperfective	28	0	0
68	imperfective	30	0	0
68	imperfective	32	0	0
68	imperfective	34	0	0
68	imperfective	36	0	0
68	imperfective	38	0	0
68	imperfective	4	0	0
68	imperfective	40	0	0
68	imperfective	42	0	0
68	imperfective	44	0	0
68	imperfective	46	0	0
68	imperfective	48	0	0
68	imperfective	50	0	0
68	imperfective	6	0	0
68	imperfective	8	0	0
68	perfective	1	0	0
68	perfective	11	0	0
68	perfective	13	0	0
68	perfective	15	0	0
68	perfective	17	0	0
68	perfective	19	0	0
68	perfective	21	0	0
68	perfective	23	0	0
68	perfective	24	0	0
68	perfective	25	0	0
68	perfective	27	0	0
68	perfective	29	0	0
68	perfective	3	0.0322581	0
68	perfective	31	0	0
68	perfective	33	0	0
68	perfective	35	0	0
68	perfective	37	0	0
68	perfective	39	0	0
68	perfective	4	0	0
68	perfective	41	0	0
68	perfective	43	0	0
68	perfective	45	0	0
68	perfective	47	0	0
68	perfective	49	0	0
68	perfective	5	0	0
68	perfective	7	0	0
68	perfective	8	0	0
68	perfective	9	0	0
72	imperfective	10	0.05	0
72	imperfective	12	0	0
72	imperfective	14	0	0
72	imperfective	16	0	0
72	imperfective	18	0	0
72	imperfective	2	0	0
72	imperfective	20	0.027027	0
72	imperfective	22	0	0
72	imperfective	24	0	0
72	imperfective	26	0	0
72	imperfective	28	0	0
72	imperfective	30	0	0
72	imperfective	32	0	0
72	imperfective	34	0	0
72	imperfective	36	0	0
72	imperfective	38	0	0
72	imperfective	4	0	0
72	imperfective	40	0	0
72	imperfective	42	0	0
72	imperfective	44	0	0
72	imperfective	46	0	0
72	imperfective	48	0	0
72	imperfective	50	0	0
72	imperfective	6	0	0
72	imperfective	8	0	0
72	perfective	1	0	0
72	perfective	11	0	0
72	perfective	13	0	0
72	perfective	15	0	0
72	perfective	17	0	0
72	perfective	19	0	0
72	perfective	21	0	0
72	perfective	23	0	0
72	perfective	24	0	0
72	perfective	25	0	0
72	perfective	27	0	0
72	perfective	29	0	0
72	perfective	3	0.0322581	0
72	perfective	31	0	0
72	perfective	33	0	0
72	perfective	35	0	0
72	perfective	37	0	0
72	perfective	39	0	0
72	perfective	4	0	0
72	perfective	41	0	0
72	perfective	43	0	0
72	perfective	45	0	0
72	perfective	47	0	0
72	perfective	49	0	0
72	perfective	5	0	0
72	perfective	7	0	0
72	perfective	8	0	0
72	perfective	9	0.0333333	0
76	imperfective	10	0.05	0
76	imperfective	12	0	0
76	imperfective	14	0	0
76	imperfective	16	0	0
76	imperfective	18	0	0
76	imperfective	2	0	0
76	imperfective	20	0.027027	0
76	imperfective	22	0	0
76	imperfective	24	0	0
76	imperfective	26	0	0
76	imperfective	28	0	0
76	imperfective	30	0	0
76	imperfective	32	0	0
76	imperfective	34	0	0
76	imperfective	36	0	0
76	imperfective	38	0	0
76	imperfective	4	0	0
76	imperfective	40	0	0
76	imperfective	42	0	0
76	imperfective	44	0	0
76	imperfective	46	0	0
76	imperfective	48	0	0
76	imperfective	50	0	0
76	imperfective	6	0	0
76	imperfective	8	0	0
76	perfective	1	0	0
76	perfective	11	0	0
76	perfective	13	0	0
76	perfective	15	0	0
76	perfective	17	0	0
76	perfective	19	0	0
76	perfective	21	0	0
76	perfective	23	0	0
76	perfective	24	0	0
76	perfective	25	0	0
76	perfective	27	0	0
76	perfective	29	0	0
76	perfective	3	0.0322581	0
76	perfective	31	0	0
76	perfective	33	0	0
76	perfective	35	0	0
76	perfective	37	0	0
76	perfective	39	0	0
76	perfective	4	0	0
76	perfective	41	0	0
76	perfective	43	0	0
76	perfective	45	0	0
76	perfective	47	0	0
76	perfective	49	0	0
76	perfective	5	0	0
76	perfective	7	0	0
76	perfective	8	0	0
76	perfective	9	0.0333333	0
80	imperfective	10	0.05	0
80	imperfective	12	0	0
80	imperfective	14	0	0
80	imperfective	16	0	0
80	imperfective	18	0	0
80	imperfective	2	0	0
80	imperfective	20	0.027027	0
80	imperfective	22	0	0
80	imperfective	24	0	0
80	imperfective	26	0	0
80	imperfective	28	0	0
80	imperfective	30	0	0
80	imperfective	32	0	0
80	imperfective	34	0	0
80	imperfective	36	0	0
80	imperfective	38	0	0
80	imperfective	4	0	0
80	imperfective	40	0	0
80	imperfective	42	0	0
80	imperfective	44	0	0
80	imperfective	46	0	0
80	imperfective	48	0	0
80	imperfective	50	0	0
80	imperfective	6	0	0
80	imperfective	8	0	0
80	perfective	1	0	0
80	perfective	11	0	0
80	perfective	13	0	0
80	perfective	15	0	0
80	perfective	17	0	0
80	perfective	19	0	0
80	perfective	21	0	0
80	perfective	23	0	0
80	perfective	24	0	0
80	perfective	25	0	0
80	perfective	27	0	0
80	perfective	29	0	0
80	perfective	3	0.0322581	0
80	perfective	31	0	0
80	perfective	33	0	0
80	perfective	35	0	0
80	perfective	37	0	0
80	perfective	39	0	0
80	perfective	4	0	0
80	perfective	41	0	0
80	perfective	43	0	0
80	perfective	45	0	0
80	perfective	47	0	0
80	perfective	49	0.030303	0
80	perfective	5	0	0
80	perfective	7	0	0
80	perfective	8	0	0
80	perfective	9	0.0333333	0
84	imperfective	10	0.05	0
84	imperfective	12	0	0
84	imperfective	14	0	0
84	imperfective	16	0	0
84	imperfective	18	0	0
84	imperfective	2	0	0
84	imperfective	20	0.027027	0
84	imperfective	22	0	0
84	imperfective	24	0	0
84	imperfective	26	0	0
84	imperfective	28	0	0
84	imperfective	30	0	0
84	imperfective	32	0	0
84	imperfective	34	0	0
84	imperfective	36	0	0
84	imperfective	38	0	0
84	imperfective	4	0	0
84	imperfective	40	0	0
84	imperfective	42	0	0
84	imperfective	44	0	0
84	imperfective	46	0	0
84	imperfective	48	0	0
84	imperfective	50	0	0
84	imperfective	6	0	0
84	imperfective	8	0	0
84	perfective	1	0	0
84	perfective	11	0	0
84	perfective	13	0	0
84	perfective	15	0	0
84	perfective	17	0	0
84	perfective	19	0	0
84	perfective	21	0	0
84	perfective	23	0	0
84	perfective	24	0	0
84	perfective	25	0	0
84	perfective	27	0	0
84	perfective	29	0	0
84	perfective	3	0.0322581	0
84	perfective	31	0	0
84	perfective	33	0	0
84	perfective	35	0	0
84	perfective	37	0	0
84	perfective	39	0	0
84	perfective	4	0	0
84	perfective	41	0	0
84	perfective	43	0	0
84	perfective	45	0	0
84	perfective	47	0	0
84	perfective	49	0.030303	0
84	perfective	5	0	0
84	perfective	7	0	0
84	perfective	8	0	0
84	perfective	9	0.0333333	0
88	imperfective	10	0.05	0
88	imperfective	12	0	0
88	imperfective	14	0	0
88	imperfective	16	0	0
88	imperfective	18	0	0
88	imperfective	2	0	0
88	imperfective	20	0.027027	0
88	imperfective	22	0	0
88	imperfective	24	0	0
88	imperfective	26	0	0
88	imperfective	28	0	0
88	imperfective	30	0	0
88	imperfective	32	0	0
88	imperfective	34	0	0
88	imperfective	36	0	0
88	imperfective	38	0	0
88	imperfective	4	0	0
88	imperfective	40	0	0
88	imperfective	42	0	0
88	imperfective	44	0	0
88	imperfective	46	0	0
88	imperfective	48	0	0
88	imperfective	50	0	0
88	imperfective	6	0	0
88	imperfective	8	0	0
88	perfective	1	0	0
88	perfective	11	0	0
88	perfective	13	0	0
88	perfective	15	0	0
88	perfective	17	0	0
88	perfective	19	0	0
88	perfective	21	0	0
88	perfective	23	0	0
88	perfective	24	0	0
88	perfective	25	0	0
88	perfective	27	0	0
88	perfective	29	0	0
88	perfective	3	0.0322581	0
88	perfective	31	0	0
88	perfective	33	0	0
88	perfective	35	0	0
88	perfective	37	0	0
88	perfective	39	0	0
88	perfective	4	0	0
88	perfective	41	0	0
88	perfective	43	0	0
88	perfective	45	0	0
88	perfective	47	0	0
88	perfective	49	0.030303	0
88	perfective	5	0	0
88	perfective	7	0	0
88	perfective	8	0	0
88	perfective	9	0.0333333	0
92	imperfective	10	0.05	0
92	imperfective	12	0	0
92	imperfective	14	0	0
92	imperfective	16	0	0
92	imperfective	18	0	0
92	imperfective	2	0	0
92	imperfective	20	0.027027	0
92	imperfective	22	0	0
92	imperfective	24	0	0
92	imperfective	26	0	0
92	imperfective	28	0	0
92	imperfective	30	0	0
92	imperfective	32	0	0
92	imperfective	34	0	0
92	imperfective	36	0	0
92	imperfective	38	0	0
92	imperfective	4	0	0
92	imperfective	40	0	0
92	imperfective	42	0	0
92	imperfective	44	0	0
92	imperfective	46	0	0
92	imperfective	48	0	0
92	imperfective	50	0	0
92	imperfective	6	0	0
92	imperfective	8	0	0
92	perfective	1	0	0
92	perfective	11	0	0
92	perfective	13	0	0
92	perfective	15	0	0
92	perfective	17	0	0
92	perfective	19	0	0
92	perfective	21	0	0
92	perfective	23	0	0
92	perfective	24	0	0
92	perfective	25	0	0
92	perfective	27	0	0
92	perfective	29	0	0
92	perfective	3	0.0322581	0
92	perfective	31	0	0
92	perfective	33	0	0
92	perfective	35	0	0
92	perfective	37	0	0
92	perfective	39	0	0
92	perfective	4	0	0
92	perfective	41	0	0
92	perfective	43	0	0
92	perfective	45	0	0
92	perfective	47	0	0
92	perfective	49	0.030303	0
92	perfective	5	0	0
92	perfective	7	0	0
92	perfective	8	0	0
92	perfective	9	0.0333333	0
96	imperfective	10	0.05	0
96	imperfective	12	0	0
96	imperfective	14	0	0
96	imperfective	16	0	0
96	imperfective	18	0	0
96	imperfective	2	0	0
96	imperfective	20	0.027027	0
96	imperfective	22	0	0
96	imperfective	24	0	0
96	imperfective	26	0	0
96	imperfective	28	0	0
96	imperfective	30	0	0
96	imperfective	32	0	0
96	imperfective	34	0	0
96	imperfective	36	0	0
96	imperfective	38	0	0
96	imperfective	4	0	0
96	imperfective	40	0	0
96	imperfective	42	0	0
96	imperfective	44	0	0
96	imperfective	46	0	0
96	imperfective	48	0	0
96	imperfective	50	0	0
96	imperfective	6	0	0
96	imperfective	8	0	0
96	perfective	1	0	0
96	perfective	11	0	0
96	perfective	13	0	0
96	perfective	15	0	0
96	perfective	17	0	0
96	perfective	19	0	0
96	perfective	21	0	0
96	perfective	23	0	0
96	perfective	24	0	0
96	perfective	25	0	0
96	perfective	27	0	0
96	perfective	29	0	0
96	perfective	3	0.0322581	0
96	perfective	31	0	0
96	perfective	33	0	0
96	perfective	35	0	0
96	perfective	37	0	0
96	perfective	39	0	0
96	perfective	4	0	0
96	perfective	41	0	0
96	perfective	43	0	0
96	perfective	45	0	0
96	perfective	47	0	0
96	perfective	49	0.030303	0
96	perfective	5	0	0
96	perfective	7	0	0
96	perfective	8	0	0
96	perfective	9	0.0333333	0
100	imperfective	10	0.05	0
100	imperfective	12	0	0
100	imperfective	14	0	0
100	imperfective	16	0	0
100	imperfective	18	0	0
100	imperfective	2	0	0
100	imperfective	20	0.027027	0
100	imperfective	22	0	0
100	imperfective	24	0	0
100	imperfective	26	0	0
100	imperfective	28	0	0
100	imperfective	30	0	0
100	imperfective	32	0	0
100	imperfective	34	0	0
100	imperfective	36	0	0
100	imperfective	38	0	0
100	imperfective	4	0	0
100	imperfective	40	0	0
100	imperfective	42	0	0
100	imperfective	44	0	0
100	imperfective	46	0	0
100	imperfective	48	0	0
100	imperfective	50	0	0
100	imperfective	6	0	0
100	imperfective	8	0	0
100	perfective	1	0	0
100	perfective	11	0	0
100	perfective	13	0	0
100	perfective	15	0	0
100	perfective	17	0	0
100	perfective	19	0	0
100	perfective	21	0	0
100	perfective	23	0	0
100	perfective	24	0	0
100	perfective	25	0	0
100	perfective	27	0	0
100	perfective	29	0	0
100	perfective	3	0.0322581	0
100	perfective	31	0	0
100	perfective	33	0	0
100	perfective	35	0	0
100	perfective	37	0	0
100	perfective	39	0	0
100	perfective	4	0	0
100	perfective	41	0	0
100	perfective	43	0	0
100	perfective	45	0	0
100	perfective	47	0	0
100	perfective	49	0.030303	0
100	perfective	5	0	0
100	perfective	7	0	0
100	perfective	8	0	0
100	perfective	9	0.0333333	0
104	imperfective	10	0.05	0
104	imperfective	12	0	0
104	imperfective	14	0	0
104	imperfective	16	0	0
104	imperfective	18	0	0
104	imperfective	2	0	0
104	imperfective	20	0.027027	0
104	imperfective	22	0	0
104	imperfective	24	0	0
104	imperfective	26	0	0
104	imperfective	28	0	0
104	imperfective	30	0	0
104	imperfective	32	0	0
104	imperfective	34	0	0
104	imperfective	36	0	0
104	imperfective	38	0	0
104	imperfective	4	0	0
104	imperfective	40	0	0
104	imperfective	42	0	0
104	imperfective	44	0	0
104	imperfective	46	0	0
104	imperfective	48	0	0
104	imperfective	50	0	0
104	imperfective	6	0	0
104	imperfective	8	0	0
104	perfective	1	0	0
104	perfective	11	0	0
104	perfective	13	0	0
104	perfective	15	0	0
104	perfective	17	0	0
104	perfective	19	0	0
104	perfective	21	0	0
104	perfective	23	0	0
104	perfective	24	0	0
104	perfective	25	0	0
104	perfective	27	0	0
104	perfective	29	0	0
104	perfective	3	0.0322581	0
104	perfective	31	0	0
104	perfective	33	0	0
104	perfective	35	0	0
104	perfective	37	0	0
104	perfective	39	0	0
104	perfective	4	0	0
104	perfective	41	0	0
104	perfective	43	0	0
104	perfective	45	0	0
104	perfective	47	0	0
104	perfective	49	0.030303	0
104	perfective	5	0	0
104	perfective	7	0	0
104	perfective	8	0	0
104	perfective	9	0.0333333	0
108	imperfective	10	0.05	0
108	imperfective	12	0	0
108	imperfective	14	0	0
108	imperfective	16	0	0
108	imperfective	18	0	0
108	imperfective	2	0	0
108	imperfective	20	0.027027	0
108	imperfective	22	0	0
108	imperfective	24	0	0
108	imperfective	26	0	0
108	imperfective	28	0	0
108	imperfective	30	0	0
108	imperfective	32	0	0
108	imperfective	34	0	0
108	imperfective	36	0	0
108	imperfective	38	0	0
108	imperfective	4	0	0
108	imperfective	40	0	0
108	imperfective	42	0	0
108	imperfective	44	0	0
108	imperfective	46	0	0
108	imperfective	48	0	0
108	imperfective	50	0	0
108	imperfective	6	0	0
108	imperfective	8	0	0
108	perfective	1	0	0
108	perfective	11	0	0
108	perfective	13	0	0
108	perfective	15	0	0
108	perfective	17	0	0
108	perfective	19	0	0
108	perfective	21	0	0
108	perfective	23	0	0
108	perfective	24	0	0
108	perfective	25	0	0
108	perfective	27	0	0
108	perfective	29	0	0
108	perfective	3	0.0322581	0
108	perfective	31	0	0
108	perfective	33	0	0
108	perfective	35	0	0
108	perfective	37	0	0
108	perfective	39	0	0
108	perfective	4	0	0
108	perfective	41	0	0
108	perfective	43	0	0
108	perfective	45	0	0
108	perfective	47	0	0
108	perfective	49	0.030303	0
108	perfective	5	0	0
108	perfective	7	0	0
108	perfective	8	0	0
108	perfective	9	0.0333333	0
112	imperfective	10	0.05	0
112	imperfective	12	0	0
112	imperfective	14	0	0
112	imperfective	16	0	0
112	imperfective	18	0	0
112	imperfective	2	0	0
112	imperfective	20	0.027027	0
112	imperfective	22	0	0
112	imperfective	24	0	0
112	imperfective	26	0	0
112	imperfective	28	0	0
112	imperfective	30	0	0
112	imperfective	32	0	0
112	imperfective	34	0	0
112	imperfective	36	0	0
112	imperfective	38	0	0
112	imperfective	4	0	0
112	imperfective	40	0	0
112	imperfective	42	0	0
112	imperfective	44	0	0
112	imperfective	46	0	0
112	imperfective	48	0	0
112	imperfective	50	0	0
112	imperfective	6	0	0
112	imperfective	8	0	0
112	perfective	1	0	0
112	perfective	11	0	0
112	perfective	13	0	0
112	perfective	15	0	0
112	perfective	17	0	0
112	perfective	19	0	0
112	perfective	21	0	0
112	perfective	23	0	0
112	perfective	24	0	0
112	perfective	25	0	0
112	perfective	27	0	0
112	perfective	29	0.030303	0
112	perfective	3	0.0322581	0
112	perfective	31	0	0
112	perfective	33	0	0
112	perfective	35	0	0
112	perfective	37	0	0
112	perfective	39	0	0
112	perfective	4	0	0
112	perfective	41	0	0
112	perfective	43	0	0
112	perfective	45	0	0
112	perfective	47	0	0
112	perfective	49	0.030303	0
112	perfective	5	0	0
112	perfective	7	0	0
112	perfective	8	0	0
112	perfective	9	0.0333333	0
116	imperfective	10	0.1	0
116	imperfective	12	0	0
116	imperfective	14	0	0
116	imperfective	16	0	0
116	imperfective	18	0	0
116	imperfective	2	0	0
116	imperfective	20	0.027027	0
116	imperfective	22	0	0
116	imperfective	24	0	0
116	imperfective	26	0	0
116	imperfective	28	0	0
116	imperfective	30	0	0
116	imperfective	32	0	0
116	imperfective	34	0	0
116	imperfective	36	0	0
116	imperfective	38	0	0
116	imperfective	4	0	0
116	imperfective	40	0	0
116	imperfective	42	0	0
116	imperfective	44	0	0
116	imperfective	46	0	0
116	imperfective	48	0	0
116	imperfective	50	0	0
116	imperfective	6	0	0
116	imperfective	8	0	0
116	perfective	1	0	0
116	perfective	11	0	0
116	perfective	13	0	0
116	perfective	15	0	0
116	perfective	17	0	0
116	perfective	19	0	0
116	perfective	21	0	0
116	perfective	23	0	0
116	perfective	24	0	0
116	perfective	25	0	0
116	perfective	27	0	0
116	perfective	29	0.030303	0
116	perfective	3	0.0322581	0
116	perfective	31	0	0
116	perfective	33	0	0
116	perfective	35	0	0
116	perfective	37	0	0
116	perfective	39	0.0454545	0
116	perfective	4	0	0
116	perfective	41	0	0
116	perfective	43	0	0
116	perfective	45	0	0
116	perfective	47	0	0
116	perfective	49	0.030303	0
116	perfective	5	0	0
116	perfective	7	0	0
116	perfective	8	0	0
116	perfective	9	0.0333333	0
120	imperfective	10	0.1	0
120	imperfective	12	0	0
120	imperfective	14	0	0
120	imperfective	16	0	0
120	imperfective	18	0	0
120	imperfective	2	0	0
120	imperfective	20	0.027027	0
120	imperfective	22	0	0
120	imperfective	24	0	0
120	imperfective	26	0	0
120	imperfective	28	0	0
120	imperfective	30	0	0
120	imperfective	32	0	0
120	imperfective	34	0	0
120	imperfective	36	0	0
120	imperfective	38	0	0
120	imperfective	4	0	0
120	imperfective	40	0	0
120	imperfective	42	0	0
120	imperfective	44	0	0
120	imperfective	46	0	0
120	imperfective	48	0	0
120	imperfective	50	0	0
120	imperfective	6	0	0
120	imperfective	8	0	0
120	perfective	1	0	0
120	perfective	11	0	0
120	perfective	13	0	0
120	perfective	15	0	0
120	perfective	17	0	0
120	perfective	19	0	0
120	perfective	21	0	0
120	perfective	23	0	0
120	perfective	24	0	0
120	perfective	25	0	0
120	perfective	27	0	0
120	perfective	29	0.030303	0
120	perfective	3	0.0322581	0
120	perfective	31	0	0
120	perfective	33	0	0
120	perfective	35	0	0
120	perfective	37	0	0
120	perfective	39	0.0454545	0
120	perfective	4	0	0
120	perfective	41	0	0
120	perfective	43	0	0
120	perfective	45	0	0
120	perfective	47	0	0
120	perfective	49	0.030303	0
120	perfective	5	0	0
120	perfective	7	0	0
120	perfective	8	0	0
120	perfective	9	0.0333333	0
124	imperfective	10	0.1	0
124	imperfective	12	0	0
124	imperfective	14	0	0
124	imperfective	16	0	0
124	imperfective	18	0	0
124	imperfective	2	0	0
124	imperfective	20	0.027027	0
124	imperfective	22	0	0
124	imperfective	24	0	0
124	imperfective	26	0	0
124	imperfective	28	0	0
124	imperfective	30	0	0
124	imperfective	32	0	0
124	imperfective	34	0	0
124	imperfective	36	0	0
124	imperfective	38	0	0
124	imperfective	4	0	0
124	imperfective	40	0	0
124	imperfective	42	0	0
124	imperfective	44	0	0
124	imperfective	46	0	0
124	imperfective	48	0	0
124	imperfective	50	0	0
124	imperfective	6	0	0
124	imperfective	8	0	0
124	perfective	1	0	0
124	perfective	11	0	0
124	perfective	13	0	0
124	perfective	15	0	0
124	perfective	17	0	0
124	perfective	19	0	0
124	perfective	21	0	0
124	perfective	23	0	0
124	perfective	24	0	0
124	perfective	25	0	0
124	perfective	27	0	0
124	perfective	29	0.030303	0
124	perfective	3	0.0322581	0
124	perfective	31	0	0
124	perfective	33	0	0
124	perfective	35	0	0
124	perfective	37	0	0
124	perfective	39	0.0454545	0
124	perfective	4	0	0
124	perfective	41	0	0
124	perfective	43	0	0
124	perfective	45	0	0
124	perfective	47	0	0
124	perfective	49	0.030303	0
124	perfective	5	0	0
124	perfective	7	0	0
124	perfective	8	0	0
124	perfective	9	0.0333333	0
128	imperfective	10	0.1	0
128	imperfective	12	0	0
128	imperfective	14	0	0
128	imperfective	16	0	0
128	imperfective	18	0	0
128	imperfective	2	0	0
128	imperfective	20	0.027027	0
128	imperfective	22	0	0
128	imperfective	24	0	0
128	imperfective	26	0	0
128	imperfective	28	0	0
128	imperfective	30	0	0
128	imperfective	32	0	0
128	imperfective	34	0	0
128	imperfective	36	0	0
128	imperfective	38	0	0
128	imperfective	4	0	0
128	imperfective	40	0	0
128	imperfective	42	0	0
128	imperfective	44	0	0
128	imperfective	46	0	0
128	imperfective	48	0	0
128	imperfective	50	0	0
128	imperfective	6	0	0
128	imperfective	8	0	0
128	perfective	1	0	0
128	perfective	11	0	0
128	perfective	13	0	0
128	perfective	15	0	0
128	perfective	17	0	0
128	perfective	19	0	0
128	perfective	21	0	0
128	perfective	23	0	0
128	perfective	24	0	0
128	perfective	25	0	0
128	perfective	27	0	0
128	perfective	29	0.030303	0
128	perfective	3	0.0322581	0
128	perfective	31	0	0
128	perfective	33	0	0
128	perfective	35	0	0
128	perfective	37	0	0
128	perfective	39	0.0454545	0
128	perfective	4	0	0
128	perfective	41	0	0
128	perfective	43	0	0
128	perfective	45	0	0
128	perfective	47	0	0
128	perfective	49	0.030303	0
128	perfective	5	0	0
128	perfective	7	0	0
128	perfective	8	0	0
128	perfective	9	0.0333333	0
132	imperfective	10	0.1	0
132	imperfective	12	0	0
132	imperfective	14	0	0
132	imperfective	16	0	0
132	imperfective	18	0	0
132	imperfective	2	0	0
132	imperfective	20	0.027027	0
132	imperfective	22	0	0
132	imperfective	24	0	0
132	imperfective	26	0	0
132	imperfective	28	0	0
132	imperfective	30	0	0
132	imperfective	32	0	0
132	imperfective	34	0	0
132	imperfective	36	0	0
132	imperfective	38	0	0
132	imperfective	4	0	0
132	imperfective	40	0	0
132	imperfective	42	0	0
132	imperfective	44	0	0
132	imperfective	46	0	0
132	imperfective	48	0	0
132	imperfective	50	0	0.0232558
132	imperfective	6	0	0
132	imperfective	8	0	0
132	perfective	1	0	0
132	perfective	11	0	0
132	perfective	13	0	0
132	perfective	15	0	0
132	perfective	17	0	0
132	perfective	19	0	0
132	perfective	21	0	0
132	perfective	23	0	0
132	perfective	24	0	0
132	perfective	25	0	0
132	perfective	27	0	0
132	perfective	29	0.030303	0
132	perfective	3	0.0322581	0
132	perfective	31	0	0
132	perfective	33	0	0
132	perfective	35	0	0
132	perfective	37	0	0
132	perfective	39	0.0454545	0
132	perfective	4	0	0
132	perfective	41	0	0
132	perfective	43	0	0
132	perfective	45	0	0
132	perfective	47	0	0
132	perfective	49	0.030303	0
132	perfective	5	0	0
132	perfective	7	0	0
132	perfective	8	0	0
132	perfective	9	0.0333333	0
136	imperfective	10	0.1	0
136	imperfective	12	0	0
136	imperfective	14	0	0
136	imperfective	16	0	0
136	imperfective	18	0	0
136	imperfective	2	0	0
136	imperfective	20	0.027027	0
136	imperfective	22	0	0
136	imperfective	24	0	0
136	imperfective	26	0	0
136	imperfective	28	0	0
136	imperfective	30	0	0
136	imperfective	32	0	0
136	imperfective	34	0	0
136	imperfective	36	0	0
136	imperfective	38	0	0
136	imperfective	4	0	0
136	imperfective	40	0	0
136	imperfective	42	0	0
136	imperfective	44	0	0
136	imperfective	46	0	0
136	imperfective	48	0	0
136	imperfective	50	0	0.0232558
136	imperfective	6	0	0
136	imperfective	8	0	0
136	perfective	1	0	0
136	perfective	11	0	0
136	perfective	13	0	0
136	perfective	15	0	0
136	perfective	17	0	0
136	perfective	19	0	0
136	perfective	21	0	0
136	perfective	23	0	0
136	perfective	24	0	0
136	perfective	25	0	0
136	perfective	27	0	0
136	perfective	29	0.030303	0
136	perfective	3	0.0322581	0
136	perfective	31	0	0
136	perfective	33	0	0
136	perfective	35	0	0
136	perfective	37	0	0
136	perfective	39	0.0454545	0
136	perfective	4	0	0
136	perfective	41	0	0
136	perfective	43	0	0
136	perfective	45	0	0
136	perfective	47	0	0
136	perfective	49	0.030303	0
136	perfective	5	0	0
136	perfective	7	0	0
136	perfective	8	0	0
136	perfective	9	0.0333333	0
140	imperfective	10	0.15	0
140	imperfective	12	0	0
140	imperfective	14	0	0
140	imperfective	16	0	0
140	imperfective	18	0	0
140	imperfective	2	0	0
140	imperfective	20	0.027027	0
140	imperfective	22	0	0
140	imperfective	24	0	0
140	imperfective	26	0	0
140	imperfective	28	0	0
140	imperfective	30	0	0
140	imperfective	32	0	0
140	imperfective	34	0	0
140	imperfective	36	0	0
140	imperfective	38	0	0
140	imperfective	4	0	0
140	imperfective	40	0.027027	0
140	imperfective	42	0	0
140	imperfective	44	0	0
140	imperfective	46	0	0
140	imperfective	48	0	0
140	imperfective	50	0	0.0232558
140	imperfective	6	0	0
140	imperfective	8	0	0
140	perfective	1	0	0
140	perfective	11	0	0
140	perfective	13	0	0
140	perfective	15	0	0
140	perfective	17	0	0
140	perfective	19	0	0
140	perfective	21	0	0
140	perfective	23	0	0
140	perfective	24	0	0
140	perfective	25	0	0
140	perfective	27	0	0
140	perfective	29	0.030303	0
140	perfective	3	0.0322581	0
140	perfective	31	0	0
140	perfective	33	0	0
140	perfective	35	0	0
140	perfective	37	0	0
140	perfective	39	0.0454545	0
140	perfective	4	0	0
140	perfective	41	0	0
140	perfective	43	0	0
140	perfective	45	0	0
140	perfective	47	0	0
140	perfective	49	0.030303	0
140	perfective	5	0	0
140	perfective	7	0	0
140	perfective	8	0	0
140	perfective	9	0.0333333	0
144	imperfective	10	0.15	0
144	imperfective	12	0	0
144	imperfective	14	0	0
144	imperfective	16	0	0
144	imperfective	18	0	0
144	imperfective	2	0	0
144	imperfective	20	0.027027	0
144	imperfective	22	0	0
144	imperfective	24	0	0
144	imperfective	26	0	0
144	imperfective	28	0	0
144	imperfective	30	0	0
144	imperfective	32	0	0
144	imperfective	34	0	0
144	imperfective	36	0	0
144	imperfective	38	0	0
144	imperfective	4	0	0
144	imperfective	40	0.027027	0
144	imperfective	42	0	0
144	imperfective	44	0	0
144	imperfective	46	0	0
144	imperfective	48	0	0
144	imperfective	50	0	0.0232558
144	imperfective	6	0	0
144	imperfective	8	0	0
144	perfective	1	0	0
144	perfective	11	0	0
144	perfective	13	0	0
144	perfective	15	0	0
144	perfective	17	0	0
144	perfective	19	0	0
144	perfective	21	0	0
144	perfective	23	0	0
144	perfective	24	0	0
144	perfective	25	0	0
144	perfective	27	0	0
144	perfective	29	0.030303	0
144	perfective	3	0.0322581	0
144	perfective	31	0	0
144	perfective	33	0	0
144	perfective	35	0	0
144	perfective	37	0	0
144	perfective	39	0.0454545	0
144	perfective	4	0	0
144	perfective	41	0	0
144	perfective	43	0	0
144	perfective	45	0	0
144	perfective	47	0	0
144	perfective	49	0.030303	0
144	perfective	5	0	0
144	perfective	7	0	0
144	perfective	8	0	0
144	perfective	9	0.0333333	0
148	imperfective	10	0.15	0
148	imperfective	12	0	0
148	imperfective	14	0	0
148	imperfective	16	0	0
148	imperfective	18	0	0
148	imperfective	2	0	0.0277778
148	imperfective	20	0.027027	0
148	imperfective	22	0	0
148	imperfective	24	0	0
148	imperfective	26	0	0
148	imperfective	28	0	0
148	imperfective	30	0	0
148	imperfective	32	0	0
148	imperfective	34	0	0
148	imperfective	36	0	0
148	imperfective	38	0	0
148	imperfective	4	0	0
148	imperfective	40	0.027027	0
148	imperfective	42	0	0
148	imperfective	44	0	0
148	imperfective	46	0	0
148	imperfective	48	0	0
148	imperfective	50	0	0.0232558
148	imperfective	6	0	0
148	imperfective	8	0	0
148	perfective	1	0	0
148	perfective	11	0	0
148	perfective	13	0	0
148	perfective	15	0	0
148	perfective	17	0	0
148	perfective	19	0	0
148	perfective	21	0	0
148	perfective	23	0	0
148	perfective	24	0	0
148	perfective	25	0	0
148	perfective	27	0	0
148	perfective	29	0.030303	0
148	perfective	3	0.0322581	0
148	perfective	31	0	0
148	perfective	33	0	0
148	perfective	35	0	0
148	perfective	37	0	0
148	perfective	39	0.0454545	0
148	perfective	4	0	0
148	perfective	41	0	0
148	perfective	43	0	0
148	perfective	45	0	0
148	perfective	47	0	0
148	perfective	49	0.030303	0
148	perfective	5	0	0
148	perfective	7	0	0
148	perfective	8	0	0
148	perfective	9	0.0333333	0
152	imperfective	10	0.15	0
152	imperfective	12	0	0
152	imperfective	14	0	0
152	imperfective	16	0	0
152	imperfective	18	0	0.0243902
152	imperfective	2	0	0.0277778
152	imperfective	20	0.027027	0
152	imperfective	22	0	0
152	imperfective	24	0	0
152	imperfective	26	0	0
152	imperfective	28	0	0
152	imperfective	30	0	0
152	imperfective	32	0	0
152	imperfective	34	0	0
152	imperfective	36	0	0
152	imperfective	38	0	0
152	imperfective	4	0	0
152	imperfective	40	0.027027	0
152	imperfective	42	0	0
152	imperfective	44	0	0
152	imperfective	46	0	0
152	imperfective	48	0	0
152	imperfective	50	0	0.0232558
152	imperfective	6	0	0
152	imperfective	8	0	0
152	perfective	1	0	0
152	perfective	11	0	0
152	perfective	13	0	0
152	perfective	15	0	0
152	perfective	17	0	0
152	perfective	19	0	0
152	perfective	21	0	0
152	perfective	23	0	0
152	perfective	24	0	0
152	perfective	25	0	0
152	perfective	27	0	0
152	perfective	29	0.030303	0
[truncated: 51,002 more rows]

## Sheet: Fig 2B
Fig 2B: By-participant means for theta band activity
time	FreqBand_individual	sentence.type	Subject	x	y	dB_change.mean
-0.6	theta	Aligned (transitive)	10	left	frontal	-0.0453095
-0.6	theta	Aligned (transitive)	10	left	central	0.117191
-0.6	theta	Aligned (transitive)	10	left	posterior	-0.27066
-0.6	theta	Aligned (transitive)	10	mid	frontal	-0.434712
-0.6	theta	Aligned (transitive)	10	mid	central	-0.424591
-0.6	theta	Aligned (transitive)	10	mid	posterior	-0.236296
-0.6	theta	Aligned (transitive)	10	right	frontal	-1.13419
-0.6	theta	Aligned (transitive)	10	right	central	-0.138295
-0.6	theta	Aligned (transitive)	10	right	posterior	-0.105896
-0.6	theta	Aligned (transitive)	12	left	frontal	-0.233725
-0.6	theta	Aligned (transitive)	12	left	central	0.307621
-0.6	theta	Aligned (transitive)	12	left	posterior	0.215002
-0.6	theta	Aligned (transitive)	12	mid	frontal	0.0200134
-0.6	theta	Aligned (transitive)	12	mid	central	-0.453341
-0.6	theta	Aligned (transitive)	12	mid	posterior	0.121653
-0.6	theta	Aligned (transitive)	12	right	frontal	-0.0867349
-0.6	theta	Aligned (transitive)	12	right	central	0.187914
-0.6	theta	Aligned (transitive)	12	right	posterior	-0.214323
-0.6	theta	Aligned (transitive)	14	left	frontal	-0.795343
-0.6	theta	Aligned (transitive)	14	left	central	-0.721231
-0.6	theta	Aligned (transitive)	14	left	posterior	-0.545584
-0.6	theta	Aligned (transitive)	14	mid	frontal	-0.412057
-0.6	theta	Aligned (transitive)	14	mid	central	-0.338144
-0.6	theta	Aligned (transitive)	14	mid	posterior	-0.264904
-0.6	theta	Aligned (transitive)	14	right	frontal	-0.128381
-0.6	theta	Aligned (transitive)	14	right	central	-0.010673
-0.6	theta	Aligned (transitive)	14	right	posterior	0.0310587
-0.6	theta	Aligned (transitive)	16	left	frontal	-0.670571
-0.6	theta	Aligned (transitive)	16	left	central	-0.543956
-0.6	theta	Aligned (transitive)	16	left	posterior	-0.664317
-0.6	theta	Aligned (transitive)	16	mid	frontal	-0.669073
-0.6	theta	Aligned (transitive)	16	mid	central	-0.990543
-0.6	theta	Aligned (transitive)	16	mid	posterior	-1.30881
-0.6	theta	Aligned (transitive)	16	right	frontal	-0.495065
-0.6	theta	Aligned (transitive)	16	right	central	-1.13726
-0.6	theta	Aligned (transitive)	16	right	posterior	-1.23144
-0.6	theta	Aligned (transitive)	18	left	frontal	-0.0827021
-0.6	theta	Aligned (transitive)	18	left	central	-0.0162957
-0.6	theta	Aligned (transitive)	18	left	posterior	-0.322982
-0.6	theta	Aligned (transitive)	18	mid	frontal	0.324124
-0.6	theta	Aligned (transitive)	18	mid	central	0.752583
-0.6	theta	Aligned (transitive)	18	mid	posterior	0.731607
-0.6	theta	Aligned (transitive)	18	right	frontal	0.259731
-0.6	theta	Aligned (transitive)	18	right	central	0.625779
-0.6	theta	Aligned (transitive)	18	right	posterior	0.604773
-0.6	theta	Aligned (transitive)	2	left	frontal	-0.173216
-0.6	theta	Aligned (transitive)	2	left	central	-0.232834
-0.6	theta	Aligned (transitive)	2	left	posterior	0.255768
-0.6	theta	Aligned (transitive)	2	mid	frontal	-0.690735
-0.6	theta	Aligned (transitive)	2	mid	central	-0.352363
-0.6	theta	Aligned (transitive)	2	mid	posterior	0.425451
-0.6	theta	Aligned (transitive)	2	right	frontal	-0.314862
-0.6	theta	Aligned (transitive)	2	right	central	0.23219
-0.6	theta	Aligned (transitive)	2	right	posterior	0.678667
-0.6	theta	Aligned (transitive)	20	left	frontal	-0.942087
-0.6	theta	Aligned (transitive)	20	left	central	-2.19089
-0.6	theta	Aligned (transitive)	20	left	posterior	-1.24005
-0.6	theta	Aligned (transitive)	20	mid	frontal	-1.27422
-0.6	theta	Aligned (transitive)	20	mid	central	-2.30777
-0.6	theta	Aligned (transitive)	20	mid	posterior	-0.718648
-0.6	theta	Aligned (transitive)	20	right	frontal	-0.159506
-0.6	theta	Aligned (transitive)	20	right	central	-1.0243
-0.6	theta	Aligned (transitive)	20	right	posterior	-1.27551
-0.6	theta	Aligned (transitive)	22	left	frontal	0.415372
-0.6	theta	Aligned (transitive)	22	left	central	0.055896
-0.6	theta	Aligned (transitive)	22	left	posterior	0.148691
-0.6	theta	Aligned (transitive)	22	mid	frontal	1.01663
-0.6	theta	Aligned (transitive)	22	mid	central	0.229445
-0.6	theta	Aligned (transitive)	22	mid	posterior	-0.18311
-0.6	theta	Aligned (transitive)	22	right	frontal	0.825356
-0.6	theta	Aligned (transitive)	22	right	central	0.0435117
-0.6	theta	Aligned (transitive)	22	right	posterior	0.200831
-0.6	theta	Aligned (transitive)	24	left	frontal	0.232924
-0.6	theta	Aligned (transitive)	24	left	central	-0.190458
-0.6	theta	Aligned (transitive)	24	left	posterior	-0.731924
-0.6	theta	Aligned (transitive)	24	mid	frontal	0.205316
-0.6	theta	Aligned (transitive)	24	mid	central	0.860852
-0.6	theta	Aligned (transitive)	24	mid	posterior	-0.123495
-0.6	theta	Aligned (transitive)	24	right	frontal	0.871403
-0.6	theta	Aligned (transitive)	24	right	central	1.32727
-0.6	theta	Aligned (transitive)	24	right	posterior	0.234236
-0.6	theta	Aligned (transitive)	26	left	frontal	-0.208085
-0.6	theta	Aligned (transitive)	26	left	central	-0.491726
-0.6	theta	Aligned (transitive)	26	left	posterior	-0.399913
-0.6	theta	Aligned (transitive)	26	mid	frontal	-0.82749
-0.6	theta	Aligned (transitive)	26	mid	central	-0.82229
-0.6	theta	Aligned (transitive)	26	mid	posterior	-0.857903
-0.6	theta	Aligned (transitive)	26	right	frontal	-0.51643
-0.6	theta	Aligned (transitive)	26	right	central	-0.00448338
-0.6	theta	Aligned (transitive)	26	right	posterior	-0.247961
-0.6	theta	Aligned (transitive)	28	left	frontal	-1.39121
-0.6	theta	Aligned (transitive)	28	left	central	-0.584399
-0.6	theta	Aligned (transitive)	28	left	posterior	-0.338584
-0.6	theta	Aligned (transitive)	28	mid	frontal	-0.285396
-0.6	theta	Aligned (transitive)	28	mid	central	0.182013
-0.6	theta	Aligned (transitive)	28	mid	posterior	0.44163
-0.6	theta	Aligned (transitive)	28	right	frontal	0.235137
-0.6	theta	Aligned (transitive)	28	right	central	0.514207
-0.6	theta	Aligned (transitive)	28	right	posterior	0.172049
-0.6	theta	Aligned (transitive)	30	left	frontal	0.06098
-0.6	theta	Aligned (transitive)	30	left	central	0.288548
-0.6	theta	Aligned (transitive)	30	left	posterior	0.500288
-0.6	theta	Aligned (transitive)	30	mid	frontal	-0.739873
-0.6	theta	Aligned (transitive)	30	mid	central	-0.635172
-0.6	theta	Aligned (transitive)	30	mid	posterior	0.179559
-0.6	theta	Aligned (transitive)	30	right	frontal	-0.427956
-0.6	theta	Aligned (transitive)	30	right	central	-0.147403
-0.6	theta	Aligned (transitive)	30	right	posterior	0.109634
-0.6	theta	Aligned (transitive)	32	left	frontal	-1.18623
-0.6	theta	Aligned (transitive)	32	left	central	-0.0173739
-0.6	theta	Aligned (transitive)	32	left	posterior	-0.131774
-0.6	theta	Aligned (transitive)	32	mid	frontal	-0.486573
-0.6	theta	Aligned (transitive)	32	mid	central	-0.0628306
-0.6	theta	Aligned (transitive)	32	mid	posterior	0.676603
-0.6	theta	Aligned (transitive)	32	right	frontal	0.514884
-0.6	theta	Aligned (transitive)	32	right	central	1.0955
-0.6	theta	Aligned (transitive)	32	right	posterior	0.360644
-0.6	theta	Aligned (transitive)	34	left	frontal	-0.456059
-0.6	theta	Aligned (transitive)	34	left	central	-0.180297
-0.6	theta	Aligned (transitive)	34	left	posterior	-0.211326
-0.6	theta	Aligned (transitive)	34	mid	frontal	-0.720213
-0.6	theta	Aligned (transitive)	34	mid	central	-0.484936
-0.6	theta	Aligned (transitive)	34	mid	posterior	-0.211443
-0.6	theta	Aligned (transitive)	34	right	frontal	-0.450677
-0.6	theta	Aligned (transitive)	34	right	central	-0.0251003
-0.6	theta	Aligned (transitive)	34	right	posterior	-0.513256
-0.6	theta	Aligned (transitive)	36	left	frontal	-0.0378748
-0.6	theta	Aligned (transitive)	36	left	central	-1.05509
-0.6	theta	Aligned (transitive)	36	left	posterior	-1.11834
-0.6	theta	Aligned (transitive)	36	mid	frontal	0.462413
-0.6	theta	Aligned (transitive)	36	mid	central	-0.754502
-0.6	theta	Aligned (transitive)	36	mid	posterior	-1.1345
-0.6	theta	Aligned (transitive)	36	right	frontal	0.353248
-0.6	theta	Aligned (transitive)	36	right	central	-0.710007
-0.6	theta	Aligned (transitive)	36	right	posterior	-1.17587
-0.6	theta	Aligned (transitive)	38	left	frontal	-0.649633
-0.6	theta	Aligned (transitive)	38	left	central	-0.631193
-0.6	theta	Aligned (transitive)	38	left	posterior	0.15847
-0.6	theta	Aligned (transitive)	38	mid	frontal	-0.397884
-0.6	theta	Aligned (transitive)	38	mid	central	-0.939999
-0.6	theta	Aligned (transitive)	38	mid	posterior	-0.293256
-0.6	theta	Aligned (transitive)	38	right	frontal	-0.239756
-0.6	theta	Aligned (transitive)	38	right	central	-0.23726
-0.6	theta	Aligned (transitive)	38	right	posterior	-0.696224
-0.6	theta	Aligned (transitive)	4	left	frontal	-0.621478
-0.6	theta	Aligned (transitive)	4	left	central	-0.772877
-0.6	theta	Aligned (transitive)	4	left	posterior	-0.683298
-0.6	theta	Aligned (transitive)	4	mid	frontal	-0.850037
-0.6	theta	Aligned (transitive)	4	mid	central	-0.093456
-0.6	theta	Aligned (transitive)	4	mid	posterior	0.73054
-0.6	theta	Aligned (transitive)	4	right	frontal	-0.161019
-0.6	theta	Aligned (transitive)	4	right	central	0.282189
-0.6	theta	Aligned (transitive)	4	right	posterior	1.19745
-0.6	theta	Aligned (transitive)	40	left	frontal	0.164021
-0.6	theta	Aligned (transitive)	40	left	central	0.324538
-0.6	theta	Aligned (transitive)	40	left	posterior	-0.139665
-0.6	theta	Aligned (transitive)	40	mid	frontal	0.143623
-0.6	theta	Aligned (transitive)	40	mid	central	0.366727
-0.6	theta	Aligned (transitive)	40	mid	posterior	0.337342
-0.6	theta	Aligned (transitive)	40	right	frontal	0.151852
-0.6	theta	Aligned (transitive)	40	right	central	0.637001
-0.6	theta	Aligned (transitive)	40	right	posterior	0.396309
-0.6	theta	Aligned (transitive)	42	left	frontal	-0.423041
-0.6	theta	Aligned (transitive)	42	left	central	-0.478551
-0.6	theta	Aligned (transitive)	42	left	posterior	0.0254468
-0.6	theta	Aligned (transitive)	42	mid	frontal	-1.26502
-0.6	theta	Aligned (transitive)	42	mid	central	0.136814
-0.6	theta	Aligned (transitive)	42	mid	posterior	-0.279332
-0.6	theta	Aligned (transitive)	42	right	frontal	-0.778889
-0.6	theta	Aligned (transitive)	42	right	central	-0.219913
-0.6	theta	Aligned (transitive)	42	right	posterior	-0.0550706
-0.6	theta	Aligned (transitive)	44	left	frontal	0.562266
-0.6	theta	Aligned (transitive)	44	left	central	0.00727276
-0.6	theta	Aligned (transitive)	44	left	posterior	-0.616388
-0.6	theta	Aligned (transitive)	44	mid	frontal	0.198157
-0.6	theta	Aligned (transitive)	44	mid	central	0.0765247
-0.6	theta	Aligned (transitive)	44	mid	posterior	-0.414496
-0.6	theta	Aligned (transitive)	44	right	frontal	0.0780194
-0.6	theta	Aligned (transitive)	44	right	central	0.0747636
-0.6	theta	Aligned (transitive)	44	right	posterior	-0.0461796
-0.6	theta	Aligned (transitive)	46	left	frontal	0.370353
-0.6	theta	Aligned (transitive)	46	left	central	0.0889276
-0.6	theta	Aligned (transitive)	46	left	posterior	0.065197
-0.6	theta	Aligned (transitive)	46	mid	frontal	0.292987
-0.6	theta	Aligned (transitive)	46	mid	central	-0.509856
-0.6	theta	Aligned (transitive)	46	mid	posterior	0.339629
-0.6	theta	Aligned (transitive)	46	right	frontal	0.295554
-0.6	theta	Aligned (transitive)	46	right	central	-0.0769081
-0.6	theta	Aligned (transitive)	46	right	posterior	0.32467
-0.6	theta	Aligned (transitive)	48	left	frontal	0.39886
-0.6	theta	Aligned (transitive)	48	left	central	0.336863
-0.6	theta	Aligned (transitive)	48	left	posterior	0.44099
-0.6	theta	Aligned (transitive)	48	mid	frontal	0.428451
-0.6	theta	Aligned (transitive)	48	mid	central	0.133834
-0.6	theta	Aligned (transitive)	48	mid	posterior	0.0103337
-0.6	theta	Aligned (transitive)	48	right	frontal	0.558065
-0.6	theta	Aligned (transitive)	48	right	central	0.470519
-0.6	theta	Aligned (transitive)	48	right	posterior	0.240012
-0.6	theta	Aligned (transitive)	50	left	frontal	0.063435
-0.6	theta	Aligned (transitive)	50	left	central	-0.271276
-0.6	theta	Aligned (transitive)	50	left	posterior	-0.187132
-0.6	theta	Aligned (transitive)	50	mid	frontal	0.0779953
-0.6	theta	Aligned (transitive)	50	mid	central	0.339771
-0.6	theta	Aligned (transitive)	50	mid	posterior	0.0640438
-0.6	theta	Aligned (transitive)	50	right	frontal	0.237713
-0.6	theta	Aligned (transitive)	50	right	central	0.0701601
-0.6	theta	Aligned (transitive)	50	right	posterior	-0.391653
-0.6	theta	Aligned (transitive)	6	left	frontal	-0.238595
-0.6	theta	Aligned (transitive)	6	left	central	-0.0646854
-0.6	theta	Aligned (transitive)	6	left	posterior	0.085241
-0.6	theta	Aligned (transitive)	6	mid	frontal	-0.371969
-0.6	theta	Aligned (transitive)	6	mid	central	-0.759605
-0.6	theta	Aligned (transitive)	6	mid	posterior	-0.222642
-0.6	theta	Aligned (transitive)	6	right	frontal	-0.530426
-0.6	theta	Aligned (transitive)	6	right	central	-0.28515
-0.6	theta	Aligned (transitive)	6	right	posterior	0.0397697
-0.6	theta	Aligned (transitive)	8	left	frontal	-0.653675
-0.6	theta	Aligned (transitive)	8	left	central	-0.11422
-0.6	theta	Aligned (transitive)	8	left	posterior	0.170241
-0.6	theta	Aligned (transitive)	8	mid	frontal	-0.285603
-0.6	theta	Aligned (transitive)	8	mid	central	0.1495
-0.6	theta	Aligned (transitive)	8	mid	posterior	0.372654
-0.6	theta	Aligned (transitive)	8	right	frontal	0.126897
-0.6	theta	Aligned (transitive)	8	right	central	-0.120334
-0.6	theta	Aligned (transitive)	8	right	posterior	0.121456
-0.6	theta	Non-aligned (transitive)	1	left	frontal	-0.616711
-0.6	theta	Non-aligned (transitive)	1	left	central	0.363024
-0.6	theta	Non-aligned (transitive)	1	left	posterior	0.480333
-0.6	theta	Non-aligned (transitive)	1	mid	frontal	-0.721482
-0.6	theta	Non-aligned (transitive)	1	mid	central	-0.805841
-0.6	theta	Non-aligned (transitive)	1	mid	posterior	0.123635
-0.6	theta	Non-aligned (transitive)	1	right	frontal	-0.375573
-0.6	theta	Non-aligned (transitive)	1	right	central	-0.737703
-0.6	theta	Non-aligned (transitive)	1	right	posterior	-0.245301
-0.6	theta	Non-aligned (transitive)	11	left	frontal	0.106266
-0.6	theta	Non-aligned (transitive)	11	left	central	0.701293
-0.6	theta	Non-aligned (transitive)	11	left	posterior	1.14293
-0.6	theta	Non-aligned (transitive)	11	mid	frontal	0.00430878
-0.6	theta	Non-aligned (transitive)	11	mid	central	1.01241
-0.6	theta	Non-aligned (transitive)	11	mid	posterior	1.48293
-0.6	theta	Non-aligned (transitive)	11	right	frontal	0.412687
-0.6	theta	Non-aligned (transitive)	11	right	central	0.568328
-0.6	theta	Non-aligned (transitive)	11	right	posterior	0.853196
-0.6	theta	Non-aligned (transitive)	13	left	frontal	-0.946707
-0.6	theta	Non-aligned (transitive)	13	left	central	-0.0993637
-0.6	theta	Non-aligned (transitive)	13	left	posterior	1.13653
-0.6	theta	Non-aligned (transitive)	13	mid	frontal	-0.724998
-0.6	theta	Non-aligned (transitive)	13	mid	central	-0.650302
-0.6	theta	Non-aligned (transitive)	13	mid	posterior	0.707641
-0.6	theta	Non-aligned (transitive)	13	right	frontal	-0.11315
-0.6	theta	Non-aligned (transitive)	13	right	central	-0.532853
-0.6	theta	Non-aligned (transitive)	13	right	posterior	0.53207
-0.6	theta	Non-aligned (transitive)	15	left	frontal	0.454289
-0.6	theta	Non-aligned (transitive)	15	left	central	-0.098741
-0.6	theta	Non-aligned (transitive)	15	left	posterior	-0.623184
-0.6	theta	Non-aligned (transitive)	15	mid	frontal	0.0810904
-0.6	theta	Non-aligned (transitive)	15	mid	central	-0.0916063
-0.6	theta	Non-aligned (transitive)	15	mid	posterior	-1.02163
-0.6	theta	Non-aligned (transitive)	15	right	frontal	-0.207664
-0.6	theta	Non-aligned (transitive)	15	right	central	-0.59279
-0.6	theta	Non-aligned (transitive)	15	right	posterior	-0.615632
-0.6	theta	Non-aligned (transitive)	17	left	frontal	-0.033042
-0.6	theta	Non-aligned (transitive)	17	left	central	0.186076
-0.6	theta	Non-aligned (transitive)	17	left	posterior	-0.0120004
-0.6	theta	Non-aligned (transitive)	17	mid	frontal	-0.362072
-0.6	theta	Non-aligned (transitive)	17	mid	central	-0.274934
-0.6	theta	Non-aligned (transitive)	17	mid	posterior	-0.272237
-0.6	theta	Non-aligned (transitive)	17	right	frontal	-0.510519
-0.6	theta	Non-aligned (transitive)	17	right	central	0.0356927
-0.6	theta	Non-aligned (transitive)	17	right	posterior	-0.410725
-0.6	theta	Non-aligned (transitive)	19	left	frontal	-1.74729
-0.6	theta	Non-aligned (transitive)	19	left	central	-0.94623
-0.6	theta	Non-aligned (transitive)	19	left	posterior	-0.318855
-0.6	theta	Non-aligned (transitive)	19	mid	frontal	-1.3768
-0.6	theta	Non-aligned (transitive)	19	mid	central	-2.27032
-0.6	theta	Non-aligned (transitive)	19	mid	posterior	-0.0314334
-0.6	theta	Non-aligned (transitive)	19	right	frontal	-1.11619
-0.6	theta	Non-aligned (transitive)	19	right	central	-1.61172
-0.6	theta	Non-aligned (transitive)	19	right	posterior	-1.13063
-0.6	theta	Non-aligned (transitive)	21	left	frontal	-0.226594
-0.6	theta	Non-aligned (transitive)	21	left	central	0.104046
-0.6	theta	Non-aligned (transitive)	21	left	posterior	-0.188129
-0.6	theta	Non-aligned (transitive)	21	mid	frontal	-0.016959
-0.6	theta	Non-aligned (transitive)	21	mid	central	-0.383249
-0.6	theta	Non-aligned (transitive)	21	mid	posterior	-0.412632
-0.6	theta	Non-aligned (transitive)	21	right	frontal	0.0133591
-0.6	theta	Non-aligned (transitive)	21	right	central	0.199701
-0.6	theta	Non-aligned (transitive)	21	right	posterior	0.318246
-0.6	theta	Non-aligned (transitive)	23	left	frontal	-0.523169
-0.6	theta	Non-aligned (transitive)	23	left	central	0.515888
-0.6	theta	Non-aligned (transitive)	23	left	posterior	0.423185
-0.6	theta	Non-aligned (transitive)	23	mid	frontal	-0.745534
-0.6	theta	Non-aligned (transitive)	23	mid	central	-0.602743
-0.6	theta	Non-aligned (transitive)	23	mid	posterior	-0.642892
-0.6	theta	Non-aligned (transitive)	23	right	frontal	-1.01281
-0.6	theta	Non-aligned (transitive)	23	right	central	-0.519566
-0.6	theta	Non-aligned (transitive)	23	right	posterior	-0.560759
-0.6	theta	Non-aligned (transitive)	24	left	frontal	-0.743292
-0.6	theta	Non-aligned (transitive)	24	left	central	0.101756
-0.6	theta	Non-aligned (transitive)	24	left	posterior	-0.717832
-0.6	theta	Non-aligned (transitive)	24	mid	frontal	-2.05432
-0.6	theta	Non-aligned (transitive)	24	mid	central	0.883495
-0.6	theta	Non-aligned (transitive)	24	mid	posterior	-0.63926
-0.6	theta	Non-aligned (transitive)	24	right	frontal	-0.761047
-0.6	theta	Non-aligned (transitive)	24	right	central	0.505411
-0.6	theta	Non-aligned (transitive)	24	right	posterior	-0.877309
-0.6	theta	Non-aligned (transitive)	25	left	frontal	0.658286
-0.6	theta	Non-aligned (transitive)	25	left	central	0.750628
-0.6	theta	Non-aligned (transitive)	25	left	posterior	-0.172881
-0.6	theta	Non-aligned (transitive)	25	mid	frontal	0.0307952
-0.6	theta	Non-aligned (transitive)	25	mid	central	0.00805203
-0.6	theta	Non-aligned (transitive)	25	mid	posterior	-0.296853
-0.6	theta	Non-aligned (transitive)	25	right	frontal	-0.0288288
-0.6	theta	Non-aligned (transitive)	25	right	central	-0.355848
-0.6	theta	Non-aligned (transitive)	25	right	posterior	-1.16628
-0.6	theta	Non-aligned (transitive)	27	left	frontal	0.196382
-0.6	theta	Non-aligned (transitive)	27	left	central	1.26512
-0.6	theta	Non-aligned (transitive)	27	left	posterior	1.6994
-0.6	theta	Non-aligned (transitive)	27	mid	frontal	-0.496099
-0.6	theta	Non-aligned (transitive)	27	mid	central	1.27586
-0.6	theta	Non-aligned (transitive)	27	mid	posterior	1.58463
-0.6	theta	Non-aligned (transitive)	27	right	frontal	0.535592
-0.6	theta	Non-aligned (transitive)	27	right	central	1.84109
-0.6	theta	Non-aligned (transitive)	27	right	posterior	1.74157
-0.6	theta	Non-aligned (transitive)	29	left	frontal	-1.49766
-0.6	theta	Non-aligned (transitive)	29	left	central	-0.884858
-0.6	theta	Non-aligned (transitive)	29	left	posterior	0.0950835
-0.6	theta	Non-aligned (transitive)	29	mid	frontal	-1.50796
-0.6	theta	Non-aligned (transitive)	29	mid	central	-0.951796
-0.6	theta	Non-aligned (transitive)	29	mid	posterior	0.0946417
-0.6	theta	Non-aligned (transitive)	29	right	frontal	0.4994
-0.6	theta	Non-aligned (transitive)	29	right	central	0.439423
-0.6	theta	Non-aligned (transitive)	29	right	posterior	-0.361724
-0.6	theta	Non-aligned (transitive)	3	left	frontal	-0.520308
-0.6	theta	Non-aligned (transitive)	3	left	central	-0.317508
-0.6	theta	Non-aligned (transitive)	3	left	posterior	-0.164859
-0.6	theta	Non-aligned (transitive)	3	mid	frontal	-0.964234
-0.6	theta	Non-aligned (transitive)	3	mid	central	-0.83892
-0.6	theta	Non-aligned (transitive)	3	mid	posterior	-0.0677796
-0.6	theta	Non-aligned (transitive)	3	right	frontal	-0.333546
-0.6	theta	Non-aligned (transitive)	3	right	central	-0.494593
-0.6	theta	Non-aligned (transitive)	3	right	posterior	-0.106432
-0.6	theta	Non-aligned (transitive)	31	left	frontal	0.349714
-0.6	theta	Non-aligned (transitive)	31	left	central	-0.0237383
-0.6	theta	Non-aligned (transitive)	31	left	posterior	-1.06561
-0.6	theta	Non-aligned (transitive)	31	mid	frontal	-1.35454
-0.6	theta	Non-aligned (transitive)	31	mid	central	-1.43083
-0.6	theta	Non-aligned (transitive)	31	mid	posterior	-0.542958
-0.6	theta	Non-aligned (transitive)	31	right	frontal	-1.56262
-0.6	theta	Non-aligned (transitive)	31	right	central	-0.785971
-0.6	theta	Non-aligned (transitive)	31	right	posterior	-0.376953
-0.6	theta	Non-aligned (transitive)	33	left	frontal	-0.342215
-0.6	theta	Non-aligned (transitive)	33	left	central	-0.234309
-0.6	theta	Non-aligned (transitive)	33	left	posterior	-0.447769
-0.6	theta	Non-aligned (transitive)	33	mid	frontal	-0.437104
-0.6	theta	Non-aligned (transitive)	33	mid	central	-0.176565
-0.6	theta	Non-aligned (transitive)	33	mid	posterior	0.227834
-0.6	theta	Non-aligned (transitive)	33	right	frontal	-0.908283
-0.6	theta	Non-aligned (transitive)	33	right	central	-0.496361
-0.6	theta	Non-aligned (transitive)	33	right	posterior	0.0360342
-0.6	theta	Non-aligned (transitive)	35	left	frontal	-0.282111
-0.6	theta	Non-aligned (transitive)	35	left	central	-0.565376
-0.6	theta	Non-aligned (transitive)	35	left	posterior	-0.49846
-0.6	theta	Non-aligned (transitive)	35	mid	frontal	-0.341551
-0.6	theta	Non-aligned (transitive)	35	mid	central	-0.426651
-0.6	theta	Non-aligned (transitive)	35	mid	posterior	-0.510424
-0.6	theta	Non-aligned (transitive)	35	right	frontal	-0.380865
-0.6	theta	Non-aligned (transitive)	35	right	central	-0.425817
-0.6	theta	Non-aligned (transitive)	35	right	posterior	-0.363097
-0.6	theta	Non-aligned (transitive)	37	left	frontal	1.43265
-0.6	theta	Non-aligned (transitive)	37	left	central	1.74322
-0.6	theta	Non-aligned (transitive)	37	left	posterior	1.97868
-0.6	theta	Non-aligned (transitive)	37	mid	frontal	1.14355
-0.6	theta	Non-aligned (transitive)	37	mid	central	1.68496
-0.6	theta	Non-aligned (transitive)	37	mid	posterior	2.57269
-0.6	theta	Non-aligned (transitive)	37	right	frontal	0.869851
-0.6	theta	Non-aligned (transitive)	37	right	central	1.35663
-0.6	theta	Non-aligned (transitive)	37	right	posterior	2.11547
-0.6	theta	Non-aligned (transitive)	39	left	frontal	0.442414
-0.6	theta	Non-aligned (transitive)	39	left	central	0.925457
-0.6	theta	Non-aligned (transitive)	39	left	posterior	0.115516
-0.6	theta	Non-aligned (transitive)	39	mid	frontal	0.175782
-0.6	theta	Non-aligned (transitive)	39	mid	central	0.192551
-0.6	theta	Non-aligned (transitive)	39	mid	posterior	-0.0471612
-0.6	theta	Non-aligned (transitive)	39	right	frontal	0.667716
-0.6	theta	Non-aligned (transitive)	39	right	central	0.876014
-0.6	theta	Non-aligned (transitive)	39	right	posterior	0.359016
-0.6	theta	Non-aligned (transitive)	4	left	frontal	0.280432
-0.6	theta	Non-aligned (transitive)	4	left	central	-0.518043
-0.6	theta	Non-aligned (transitive)	4	left	posterior	-1.12095
-0.6	theta	Non-aligned (transitive)	4	mid	frontal	2.24111
-0.6	theta	Non-aligned (transitive)	4	mid	central	1.59544
-0.6	theta	Non-aligned (transitive)	4	mid	posterior	-2.8663
-0.6	theta	Non-aligned (transitive)	4	right	frontal	1.37535
-0.6	theta	Non-aligned (transitive)	4	right	central	-3.70851
-0.6	theta	Non-aligned (transitive)	4	right	posterior	-0.679178
-0.6	theta	Non-aligned (transitive)	41	left	frontal	-0.408105
-0.6	theta	Non-aligned (transitive)	41	left	central	-0.418409
-0.6	theta	Non-aligned (transitive)	41	left	posterior	0.112719
-0.6	theta	Non-aligned (transitive)	41	mid	frontal	-0.655897
-0.6	theta	Non-aligned (transitive)	41	mid	central	-0.369279
-0.6	theta	Non-aligned (transitive)	41	mid	posterior	-0.146544
-0.6	theta	Non-aligned (transitive)	41	right	frontal	-0.942162
-0.6	theta	Non-aligned (transitive)	41	right	central	-0.273331
-0.6	theta	Non-aligned (transitive)	41	right	posterior	-0.094361
-0.6	theta	Non-aligned (transitive)	43	left	frontal	-0.259096
-0.6	theta	Non-aligned (transitive)	43	left	central	-0.146907
-0.6	theta	Non-aligned (transitive)	43	left	posterior	-0.144384
-0.6	theta	Non-aligned (transitive)	43	mid	frontal	-0.421665
-0.6	theta	Non-aligned (transitive)	43	mid	central	-0.0260012
-0.6	theta	Non-aligned (transitive)	43	mid	posterior	0.333566
-0.6	theta	Non-aligned (transitive)	43	right	frontal	-0.345419
-0.6	theta	Non-aligned (transitive)	43	right	central	-0.0934202
-0.6	theta	Non-aligned (transitive)	43	right	posterior	0.543127
-0.6	theta	Non-aligned (transitive)	45	left	frontal	-0.0693617
-0.6	theta	Non-aligned (transitive)	45	left	central	0.0826278
-0.6	theta	Non-aligned (transitive)	45	left	posterior	0.0783449
-0.6	theta	Non-aligned (transitive)	45	mid	frontal	-0.940212
-0.6	theta	Non-aligned (transitive)	45	mid	central	-0.618219
-0.6	theta	Non-aligned (transitive)	45	mid	posterior	0.581887
-0.6	theta	Non-aligned (transitive)	45	right	frontal	-0.43728
-0.6	theta	Non-aligned (transitive)	45	right	central	-0.27997
-0.6	theta	Non-aligned (transitive)	45	right	posterior	0.0647705
-0.6	theta	Non-aligned (transitive)	47	left	frontal	-0.806417
-0.6	theta	Non-aligned (transitive)	47	left	central	-1.08641
-0.6	theta	Non-aligned (transitive)	47	left	posterior	-1.07322
-0.6	theta	Non-aligned (transitive)	47	mid	frontal	-0.451549
-0.6	theta	Non-aligned (transitive)	47	mid	central	-0.0161104
-0.6	theta	Non-aligned (transitive)	47	mid	posterior	-1.35466
-0.6	theta	Non-aligned (transitive)	47	right	frontal	-0.331594
-0.6	theta	Non-aligned (transitive)	47	right	central	-0.879463
-0.6	theta	Non-aligned (transitive)	47	right	posterior	-0.933974
-0.6	theta	Non-aligned (transitive)	49	left	frontal	-0.687355
-0.6	theta	Non-aligned (transitive)	49	left	central	-0.21668
-0.6	theta	Non-aligned (transitive)	49	left	posterior	-0.208467
-0.6	theta	Non-aligned (transitive)	49	mid	frontal	-0.418839
-0.6	theta	Non-aligned (transitive)	49	mid	central	0.0130469
-0.6	theta	Non-aligned (transitive)	49	mid	posterior	0.0746681
-0.6	theta	Non-aligned (transitive)	49	right	frontal	-0.854511
-0.6	theta	Non-aligned (transitive)	49	right	central	-0.156202
-0.6	theta	Non-aligned (transitive)	49	right	posterior	0.180598
-0.6	theta	Non-aligned (transitive)	5	left	frontal	-0.108696
-0.6	theta	Non-aligned (transitive)	5	left	central	0.126895
-0.6	theta	Non-aligned (transitive)	5	left	posterior	-0.336655
-0.6	theta	Non-aligned (transitive)	5	mid	frontal	-0.747906
-0.6	theta	Non-aligned (transitive)	5	mid	central	-0.496998
-0.6	theta	Non-aligned (transitive)	5	mid	posterior	-0.285368
-0.6	theta	Non-aligned (transitive)	5	right	frontal	-0.744989
-0.6	theta	Non-aligned (transitive)	5	right	central	-0.939302
-0.6	theta	Non-aligned (transitive)	5	right	posterior	-0.217928
-0.6	theta	Non-aligned (transitive)	7	left	frontal	-0.376168
-0.6	theta	Non-aligned (transitive)	7	left	central	-1.00509
-0.6	theta	Non-aligned (transitive)	7	left	posterior	-0.944918
-0.6	theta	Non-aligned (transitive)	7	mid	frontal	-0.470543
-0.6	theta	Non-aligned (transitive)	7	mid	central	-0.777067
-0.6	theta	Non-aligned (transitive)	7	mid	posterior	-0.00788077
-0.6	theta	Non-aligned (transitive)	7	right	frontal	-0.944441
-0.6	theta	Non-aligned (transitive)	7	right	central	-0.967149
-0.6	theta	Non-aligned (transitive)	7	right	posterior	-0.201232
-0.6	theta	Non-aligned (transitive)	8	left	frontal	-0.58569
-0.6	theta	Non-aligned (transitive)	8	left	central	-1.70986
-0.6	theta	Non-aligned (transitive)	8	left	posterior	-1.07545
-0.6	theta	Non-aligned (transitive)	8	mid	frontal	-2.32514
-0.6	theta	Non-aligned (transitive)	8	mid	central	-0.102753
-0.6	theta	Non-aligned (transitive)	8	mid	posterior	0.260016
-0.6	theta	Non-aligned (transitive)	8	right	frontal	-2.24189
-0.6	theta	Non-aligned (transitive)	8	right	central	0.20419
-0.6	theta	Non-aligned (transitive)	8	right	posterior	-0.330553
-0.6	theta	Non-aligned (transitive)	9	left	frontal	-0.627126
-0.6	theta	Non-aligned (transitive)	9	left	central	-0.323433
-0.6	theta	Non-aligned (transitive)	9	left	posterior	-0.665263
-0.6	theta	Non-aligned (transitive)	9	mid	frontal	0.424416
-0.6	theta	Non-aligned (transitive)	9	mid	central	-1.61702
-0.6	theta	Non-aligned (transitive)	9	mid	posterior	-0.954812
-0.6	theta	Non-aligned (transitive)	9	right	frontal	-0.200794
-0.6	theta	Non-aligned (transitive)	9	right	central	-1.53267
-0.6	theta	Non-aligned (transitive)	9	right	posterior	-0.712416
-0.6	theta	Aligned (intransitive)	10	left	frontal	-0.117558
-0.6	theta	Aligned (intransitive)	10	left	central	-1.38204
-0.6	theta	Aligned (intransitive)	10	left	posterior	-0.337944
-0.6	theta	Aligned (intransitive)	10	mid	frontal	0.322508
-0.6	theta	Aligned (intransitive)	10	mid	central	-1.15622
-0.6	theta	Aligned (intransitive)	10	mid	posterior	-0.52815
-0.6	theta	Aligned (intransitive)	10	right	frontal	-0.46825
-0.6	theta	Aligned (intransitive)	10	right	central	-1.51889
-0.6	theta	Aligned (intransitive)	10	right	posterior	-0.927514
-0.6	theta	Aligned (intransitive)	12	left	frontal	-0.0906635
-0.6	theta	Aligned (intransitive)	12	left	central	-0.782418
-0.6	theta	Aligned (intransitive)	12	left	posterior	-0.311751
-0.6	theta	Aligned (intransitive)	12	mid	frontal	-0.201516
-0.6	theta	Aligned (intransitive)	12	mid	central	-1.07025
-0.6	theta	Aligned (intransitive)	12	mid	posterior	-0.339085
-0.6	theta	Aligned (intransitive)	12	right	frontal	-0.0806593
-0.6	theta	Aligned (intransitive)	12	right	central	-0.544514
-0.6	theta	Aligned (intransitive)	12	right	posterior	-0.535323
-0.6	theta	Aligned (intransitive)	14	left	frontal	0.418895
-0.6	theta	Aligned (intransitive)	14	left	central	0.302787
-0.6	theta	Aligned (intransitive)	14	left	posterior	0.473607
-0.6	theta	Aligned (intransitive)	14	mid	frontal	0.196901
-0.6	theta	Aligned (intransitive)	14	mid	central	0.22004
-0.6	theta	Aligned (intransitive)	14	mid	posterior	-0.285309
-0.6	theta	Aligned (intransitive)	14	right	frontal	0.211116
-0.6	theta	Aligned (intransitive)	14	right	central	0.442184
-0.6	theta	Aligned (intransitive)	14	right	posterior	0.320644
-0.6	theta	Aligned (intransitive)	16	left	frontal	-0.719075
-0.6	theta	Aligned (intransitive)	16	left	central	-0.933622
-0.6	theta	Aligned (intransitive)	16	left	posterior	-0.828496
-0.6	theta	Aligned (intransitive)	16	mid	frontal	-1.08917
-0.6	theta	Aligned (intransitive)	16	mid	central	-1.37377
-0.6	theta	Aligned (intransitive)	16	mid	posterior	-1.31888
-0.6	theta	Aligned (intransitive)	16	right	frontal	-0.824349
-0.6	theta	Aligned (intransitive)	16	right	central	-0.819233
-0.6	theta	Aligned (intransitive)	16	right	posterior	-1.19701
-0.6	theta	Aligned (intransitive)	18	left	frontal	0.571111
-0.6	theta	Aligned (intransitive)	18	left	central	0.00308751
-0.6	theta	Aligned (intransitive)	18	left	posterior	0.368814
-0.6	theta	Aligned (intransitive)	18	mid	frontal	0.709986
-0.6	theta	Aligned (intransitive)	18	mid	central	0.343557
-0.6	theta	Aligned (intransitive)	18	mid	posterior	0.591567
-0.6	theta	Aligned (intransitive)	18	right	frontal	0.131054
-0.6	theta	Aligned (intransitive)	18	right	central	0.372032
-0.6	theta	Aligned (intransitive)	18	right	posterior	-0.0813149
-0.6	theta	Aligned (intransitive)	2	left	frontal	0.637735
-0.6	theta	Aligned (intransitive)	2	left	central	0.349184
-0.6	theta	Aligned (intransitive)	2	left	posterior	0.0225272
-0.6	theta	Aligned (intransitive)	2	mid	frontal	0.555339
-0.6	theta	Aligned (intransitive)	2	mid	central	-0.246084
-0.6	theta	Aligned (intransitive)	2	mid	posterior	-0.157039
-0.6	theta	Aligned (intransitive)	2	right	frontal	0.192216
-0.6	theta	Aligned (intransitive)	2	right	central	-0.094086
-0.6	theta	Aligned (intransitive)	2	right	posterior	0.037553
-0.6	theta	Aligned (intransitive)	20	left	frontal	0.822497
-0.6	theta	Aligned (intransitive)	20	left	central	-0.47803
-0.6	theta	Aligned (intransitive)	20	left	posterior	-0.593632
-0.6	theta	Aligned (intransitive)	20	mid	frontal	0.47103
-0.6	theta	Aligned (intransitive)	20	mid	central	-0.229392
-0.6	theta	Aligned (intransitive)	20	mid	posterior	-0.449837
-0.6	theta	Aligned (intransitive)	20	right	frontal	-0.591904
-0.6	theta	Aligned (intransitive)	20	right	central	-0.108188
-0.6	theta	Aligned (intransitive)	20	right	posterior	0.325181
-0.6	theta	Aligned (intransitive)	22	left	frontal	-0.265036
-0.6	theta	Aligned (intransitive)	22	left	central	-0.0456357
-0.6	theta	Aligned (intransitive)	22	left	posterior	-0.783168
-0.6	theta	Aligned (intransitive)	22	mid	frontal	0.0351911
-0.6	theta	Aligned (intransitive)	22	mid	central	-0.423016
-0.6	theta	Aligned (intransitive)	22	mid	posterior	-0.805508
-0.6	theta	Aligned (intransitive)	22	right	frontal	-0.285799
-0.6	theta	Aligned (intransitive)	22	right	central	-0.537603
-0.6	theta	Aligned (intransitive)	22	right	posterior	-0.290352
-0.6	theta	Aligned (intransitive)	24	left	frontal	0.29511
-0.6	theta	Aligned (intransitive)	24	left	central	0.214037
-0.6	theta	Aligned (intransitive)	24	left	posterior	0.148941
-0.6	theta	Aligned (intransitive)	24	mid	frontal	0.668588
-0.6	theta	Aligned (intransitive)	24	mid	central	0.498379
-0.6	theta	Aligned (intransitive)	24	mid	posterior	0.605913
-0.6	theta	Aligned (intransitive)	24	right	frontal	0.151528
-0.6	theta	Aligned (intransitive)	24	right	central	0.333536
-0.6	theta	Aligned (intransitive)	24	right	posterior	-0.0142894
-0.6	theta	Aligned (intransitive)	26	left	frontal	0.127214
-0.6	theta	Aligned (intransitive)	26	left	central	-0.310314
-0.6	theta	Aligned (intransitive)	26	left	posterior	-0.109074
-0.6	theta	Aligned (intransitive)	26	mid	frontal	0.251337
-0.6	theta	Aligned (intransitive)	26	mid	central	0.0610295
-0.6	theta	Aligned (intransitive)	26	mid	posterior	0.749927
-0.6	theta	Aligned (intransitive)	26	right	frontal	-0.111038
-0.6	theta	Aligned (intransitive)	26	right	central	0.72029
-0.6	theta	Aligned (intransitive)	26	right	posterior	0.834024
-0.6	theta	Aligned (intransitive)	28	left	frontal	-0.519434
-0.6	theta	Aligned (intransitive)	28	left	central	-0.467885
-0.6	theta	Aligned (intransitive)	28	left	posterior	-0.125833
-0.6	theta	Aligned (intransitive)	28	mid	frontal	-1.01812
-0.6	theta	Aligned (intransitive)	28	mid	central	-0.289661
-0.6	theta	Aligned (intransitive)	28	mid	posterior	-0.178195
-0.6	theta	Aligned (intransitive)	28	right	frontal	-0.616527
-0.6	theta	Aligned (intransitive)	28	right	central	0.0933216
-0.6	theta	Aligned (intransitive)	28	right	posterior	0.640781
-0.6	theta	Aligned (intransitive)	30	left	frontal	-0.238643
-0.6	theta	Aligned (intransitive)	30	left	central	0.125286
-0.6	theta	Aligned (intransitive)	30	left	posterior	-0.0294713
-0.6	theta	Aligned (intransitive)	30	mid	frontal	-0.4075
-0.6	theta	Aligned (intransitive)	30	mid	central	-0.195286
-0.6	theta	Aligned (intransitive)	30	mid	posterior	-0.405525
-0.6	theta	Aligned (intransitive)	30	right	frontal	-0.589573
-0.6	theta	Aligned (intransitive)	30	right	central	-0.648279
-0.6	theta	Aligned (intransitive)	30	right	posterior	-0.056059
-0.6	theta	Aligned (intransitive)	32	left	frontal	0.355636
-0.6	theta	Aligned (intransitive)	32	left	central	0.183846
-0.6	theta	Aligned (intransitive)	32	left	posterior	-0.234489
-0.6	theta	Aligned (intransitive)	32	mid	frontal	-0.35065
-0.6	theta	Aligned (intransitive)	32	mid	central	-0.0848183
-0.6	theta	Aligned (intransitive)	32	mid	posterior	-0.393263
-0.6	theta	Aligned (intransitive)	32	right	frontal	-0.512644
-0.6	theta	Aligned (intransitive)	32	right	central	-0.367415
-0.6	theta	Aligned (intransitive)	32	right	posterior	-0.164268
-0.6	theta	Aligned (intransitive)	34	left	frontal	-0.657867
-0.6	theta	Aligned (intransitive)	34	left	central	-0.717894
-0.6	theta	Aligned (intransitive)	34	left	posterior	0.0338313
-0.6	theta	Aligned (intransitive)	34	mid	frontal	-1.11887
-0.6	theta	Aligned (intransitive)	34	mid	central	-0.523978
-0.6	theta	Aligned (intransitive)	34	mid	posterior	-0.212402
-0.6	theta	Aligned (intransitive)	34	right	frontal	-0.82834
-0.6	theta	Aligned (intransitive)	34	right	central	-0.875534
-0.6	theta	Aligned (intransitive)	34	right	posterior	-0.588005
-0.6	theta	Aligned (intransitive)	36	left	frontal	-0.0605553
-0.6	theta	Aligned (intransitive)	36	left	central	-0.0653666
-0.6	theta	Aligned (intransitive)	36	left	posterior	0.20162
-0.6	theta	Aligned (intransitive)	36	mid	frontal	-0.393187
-0.6	theta	Aligned (intransitive)	36	mid	central	-0.0343638
-0.6	theta	Aligned (intransitive)	36	mid	posterior	-0.283866
-0.6	theta	Aligned (intransitive)	36	right	frontal	-0.154964
-0.6	theta	Aligned (intransitive)	36	right	central	-0.597008
-0.6	theta	Aligned (intransitive)	36	right	posterior	-0.736552
-0.6	theta	Aligned (intransitive)	38	left	frontal	-0.240022
-0.6	theta	Aligned (intransitive)	38	left	central	-0.927579
-0.6	theta	Aligned (intransitive)	38	left	posterior	-0.819447
-0.6	theta	Aligned (intransitive)	38	mid	frontal	-0.0460562
-0.6	theta	Aligned (intransitive)	38	mid	central	-1.37162
-0.6	theta	Aligned (intransitive)	38	mid	posterior	-1.03845
-0.6	theta	Aligned (intransitive)	38	right	frontal	-0.377255
-0.6	theta	Aligned (intransitive)	38	right	central	-0.86749
-0.6	theta	Aligned (intransitive)	38	right	posterior	-1.15111
-0.6	theta	Aligned (intransitive)	4	left	frontal	0.618106
-0.6	theta	Aligned (intransitive)	4	left	central	0.0967611
-0.6	theta	Aligned (intransitive)	4	left	posterior	-0.0735999
-0.6	theta	Aligned (intransitive)	4	mid	frontal	0.176964
-0.6	theta	Aligned (intransitive)	4	mid	central	-0.648386
-0.6	theta	Aligned (intransitive)	4	mid	posterior	-0.651001
-0.6	theta	Aligned (intransitive)	4	right	frontal	0.651117
-0.6	theta	Aligned (intransitive)	4	right	central	-0.11298
-0.6	theta	Aligned (intransitive)	4	right	posterior	-0.133125
-0.6	theta	Aligned (intransitive)	40	left	frontal	0.17611
-0.6	theta	Aligned (intransitive)	40	left	central	-0.281528
-0.6	theta	Aligned (intransitive)	40	left	posterior	-0.445097
-0.6	theta	Aligned (intransitive)	40	mid	frontal	0.374616
-0.6	theta	Aligned (intransitive)	40	mid	central	-0.141312
-0.6	theta	Aligned (intransitive)	40	mid	posterior	0.159229
-0.6	theta	Aligned (intransitive)	40	right	frontal	0.331268
-0.6	theta	Aligned (intransitive)	40	right	central	0.289187
-0.6	theta	Aligned (intransitive)	40	right	posterior	-0.215807
-0.6	theta	Aligned (intransitive)	42	left	frontal	0.0694227
-0.6	theta	Aligned (intransitive)	42	left	central	0.344313
-0.6	theta	Aligned (intransitive)	42	left	posterior	0.319709
-0.6	theta	Aligned (intransitive)	42	mid	frontal	-0.378311
-0.6	theta	Aligned (intransitive)	42	mid	central	0.346368
-0.6	theta	Aligned (intransitive)	42	mid	posterior	0.24049
-0.6	theta	Aligned (intransitive)	42	right	frontal	-0.0512651
-0.6	theta	Aligned (intransitive)	42	right	central	0.0192333
-0.6	theta	Aligned (intransitive)	42	right	posterior	-0.0666609
-0.6	theta	Aligned (intransitive)	44	left	frontal	-0.153517
-0.6	theta	Aligned (intransitive)	44	left	central	-0.139069
-0.6	theta	Aligned (intransitive)	44	left	posterior	-0.240576
-0.6	theta	Aligned (intransitive)	44	mid	frontal	-0.118453
-0.6	theta	Aligned (intransitive)	44	mid	central	-0.0163726
-0.6	theta	Aligned (intransitive)	44	mid	posterior	0.618125
-0.6	theta	Aligned (intransitive)	44	right	frontal	0.154434
-0.6	theta	Aligned (intransitive)	44	right	central	0.575934
-0.6	theta	Aligned (intransitive)	44	right	posterior	0.237486
-0.6	theta	Aligned (intransitive)	46	left	frontal	0.267756
-0.6	theta	Aligned (intransitive)	46	left	central	0.168
-0.6	theta	Aligned (intransitive)	46	left	posterior	0.0819256
-0.6	theta	Aligned (intransitive)	46	mid	frontal	0.214786
-0.6	theta	Aligned (intransitive)	46	mid	central	0.293624
-0.6	theta	Aligned (intransitive)	46	mid	posterior	-0.223264
-0.6	theta	Aligned (intransitive)	46	right	frontal	0.301893
-0.6	theta	Aligned (intransitive)	46	right	central	0.0663935
-0.6	theta	Aligned (intransitive)	46	right	posterior	-0.193664
-0.6	theta	Aligned (intransitive)	48	left	frontal	-0.240397
-0.6	theta	Aligned (intransitive)	48	left	central	0.419233
-0.6	theta	Aligned (intransitive)	48	left	posterior	0.219956
-0.6	theta	Aligned (intransitive)	48	mid	frontal	-0.37239
-0.6	theta	Aligned (intransitive)	48	mid	central	0.125249
-0.6	theta	Aligned (intransitive)	48	mid	posterior	-0.0205878
-0.6	theta	Aligned (intransitive)	48	right	frontal	-0.24239
-0.6	theta	Aligned (intransitive)	48	right	central	0.147309
-0.6	theta	Aligned (intransitive)	48	right	posterior	-0.131758
-0.6	theta	Aligned (intransitive)	50	left	frontal	0.255832
-0.6	theta	Aligned (intransitive)	50	left	central	0.0231193
-0.6	theta	Aligned (intransitive)	50	left	posterior	0.186141
-0.6	theta	Aligned (intransitive)	50	mid	frontal	0.576202
-0.6	theta	Aligned (intransitive)	50	mid	central	-0.514832
-0.6	theta	Aligned (intransitive)	50	mid	posterior	-0.134415
-0.6	theta	Aligned (intransitive)	50	right	frontal	0.520323
-0.6	theta	Aligned (intransitive)	50	right	central	-0.0356153
-0.6	theta	Aligned (intransitive)	50	right	posterior	0.982738
-0.6	theta	Aligned (intransitive)	6	left	frontal	-0.137973
-0.6	theta	Aligned (intransitive)	6	left	central	-0.450707
-0.6	theta	Aligned (intransitive)	6	left	posterior	0.201965
-0.6	theta	Aligned (intransitive)	6	mid	frontal	-0.456341
-0.6	theta	Aligned (intransitive)	6	mid	central	-0.081983
-0.6	theta	Aligned (intransitive)	6	mid	posterior	0.067864
-0.6	theta	Aligned (intransitive)	6	right	frontal	-0.435638
-0.6	theta	Aligned (intransitive)	6	right	central	-0.304949
-0.6	theta	Aligned (intransitive)	6	right	posterior	0.21335
-0.6	theta	Aligned (intransitive)	8	left	frontal	0.543282
-0.6	theta	Aligned (intransitive)	8	left	central	-0.0970746
-0.6	theta	Aligned (intransitive)	8	left	posterior	-0.22205
-0.6	theta	Aligned (intransitive)	8	mid	frontal	0.257055
-0.6	theta	Aligned (intransitive)	8	mid	central	0.0424385
-0.6	theta	Aligned (intransitive)	8	mid	posterior	-0.330833
-0.6	theta	Aligned (intransitive)	8	right	frontal	0.407731
-0.6	theta	Aligned (intransitive)	8	right	central	-0.202063
-0.6	theta	Aligned (intransitive)	8	right	posterior	-0.482501
-0.6	theta	Non-aligned (intransitive)	1	left	frontal	0.0855528
-0.6	theta	Non-aligned (intransitive)	1	left	central	0.573296
-0.6	theta	Non-aligned (intransitive)	1	left	posterior	0.406513
-0.6	theta	Non-aligned (intransitive)	1	mid	frontal	0.187632
-0.6	theta	Non-aligned (intransitive)	1	mid	central	-0.551728
-0.6	theta	Non-aligned (intransitive)	1	mid	posterior	-0.30159
-0.6	theta	Non-aligned (intransitive)	1	right	frontal	-0.300306
-0.6	theta	Non-aligned (intransitive)	1	right	central	-0.570507
-0.6	theta	Non-aligned (intransitive)	1	right	posterior	-0.486247
-0.6	theta	Non-aligned (intransitive)	11	left	frontal	-1.47117
-0.6	theta	Non-aligned (intransitive)	11	left	central	-0.890195
-0.6	theta	Non-aligned (intransitive)	11	left	posterior	-0.467372
-0.6	theta	Non-aligned (intransitive)	11	mid	frontal	-1.47978
-0.6	theta	Non-aligned (intransitive)	11	mid	central	-0.880136
-0.6	theta	Non-aligned (intransitive)	11	mid	posterior	-0.837076
-0.6	theta	Non-aligned (intransitive)	11	right	frontal	-1.21111
-0.6	theta	Non-aligned (intransitive)	11	right	central	-0.456053
-0.6	theta	Non-aligned (intransitive)	11	right	posterior	-0.240419
-0.6	theta	Non-aligned (intransitive)	13	left	frontal	-0.187939
-0.6	theta	Non-aligned (intransitive)	13	left	central	0.0998784
-0.6	theta	Non-aligned (intransitive)	13	left	posterior	0.07013
-0.6	theta	Non-aligned (intransitive)	13	mid	frontal	-0.0476649
-0.6	theta	Non-aligned (intransitive)	13	mid	central	0.131087
-0.6	theta	Non-aligned (intransitive)	13	mid	posterior	0.053772
-0.6	theta	Non-aligned (intransitive)	13	right	frontal	-0.221841
-0.6	theta	Non-aligned (intransitive)	13	right	central	-0.155393
-0.6	theta	Non-aligned (intransitive)	13	right	posterior	0.0675256
-0.6	theta	Non-aligned (intransitive)	15	left	frontal	0.369388
-0.6	theta	Non-aligned (intransitive)	15	left	central	0.444817
-0.6	theta	Non-aligned (intransitive)	15	left	posterior	-0.33343
-0.6	theta	Non-aligned (intransitive)	15	mid	frontal	0.435675
-0.6	theta	Non-aligned (intransitive)	15	mid	central	0.612242
-0.6	theta	Non-aligned (intransitive)	15	mid	posterior	-0.247482
-0.6	theta	Non-aligned (intransitive)	15	right	frontal	0.612798
-0.6	theta	Non-aligned (intransitive)	15	right	central	0.248247
-0.6	theta	Non-aligned (intransitive)	15	right	posterior	-0.124788
-0.6	theta	Non-aligned (intransitive)	17	left	frontal	-1.12316
-0.6	theta	Non-aligned (intransitive)	17	left	central	-0.653107
-0.6	theta	Non-aligned (intransitive)	17	left	posterior	-0.233156
-0.6	theta	Non-aligned (intransitive)	17	mid	frontal	-1.59139
-0.6	theta	Non-aligned (intransitive)	17	mid	central	-0.269999
-0.6	theta	Non-aligned (intransitive)	17	mid	posterior	-0.433999
-0.6	theta	Non-aligned (intransitive)	17	right	frontal	-0.58939
-0.6	theta	Non-aligned (intransitive)	17	right	central	0.39422
-0.6	theta	Non-aligned (intransitive)	17	right	posterior	-0.415952
-0.6	theta	Non-aligned (intransitive)	19	left	frontal	-0.353989
-0.6	theta	Non-aligned (intransitive)	19	left	central	-0.143073
-0.6	theta	Non-aligned (intransitive)	19	left	posterior	-0.237052
-0.6	theta	Non-aligned (intransitive)	19	mid	frontal	-0.166528
-0.6	theta	Non-aligned (intransitive)	19	mid	central	-0.51226
-0.6	theta	Non-aligned (intransitive)	19	mid	posterior	-0.607657
-0.6	theta	Non-aligned (intransitive)	19	right	frontal	0.243363
-0.6	theta	Non-aligned (intransitive)	19	right	central	-0.378095
-0.6	theta	Non-aligned (intransitive)	19	right	posterior	-0.344652
-0.6	theta	Non-aligned (intransitive)	21	left	frontal	0.116068
-0.6	theta	Non-aligned (intransitive)	21	left	central	0.131996
-0.6	theta	Non-aligned (intransitive)	21	left	posterior	0.229943
-0.6	theta	Non-aligned (intransitive)	21	mid	frontal	0.327925
-0.6	theta	Non-aligned (intransitive)	21	mid	central	0.658122
-0.6	theta	Non-aligned (intransitive)	21	mid	posterior	0.648135
-0.6	theta	Non-aligned (intransitive)	21	right	frontal	0.863486
-0.6	theta	Non-aligned (intransitive)	21	right	central	1.24938
-0.6	theta	Non-aligned (intransitive)	21	right	posterior	0.843189
-0.6	theta	Non-aligned (intransitive)	23	left	frontal	-0.0619781
-0.6	theta	Non-aligned (intransitive)	23	left	central	0.142926
-0.6	theta	Non-aligned (intransitive)	23	left	posterior	0.136701
-0.6	theta	Non-aligned (intransitive)	23	mid	frontal	0.128313
-0.6	theta	Non-aligned (intransitive)	23	mid	central	0.173358
-0.6	theta	Non-aligned (intransitive)	23	mid	posterior	-0.154668
-0.6	theta	Non-aligned (intransitive)	23	right	frontal	0.198167
-0.6	theta	Non-aligned (intransitive)	23	right	central	-0.209914
-0.6	theta	Non-aligned (intransitive)	23	right	posterior	-0.357943
-0.6	theta	Non-aligned (intransitive)	24	left	frontal	2.76541
-0.6	theta	Non-aligned (intransitive)	24	left	central	2.13225
-0.6	theta	Non-aligned (intransitive)	24	left	posterior	4.35747
-0.6	theta	Non-aligned (intransitive)	24	mid	frontal	-0.33486
-0.6	theta	Non-aligned (intransitive)	24	mid	central	-1.56132
-0.6	theta	Non-aligned (intransitive)	24	mid	posterior	2.01827
-0.6	theta	Non-aligned (intransitive)	24	right	frontal	-1.73724
-0.6	theta	Non-aligned (intransitive)	24	right	central	-2.52804
-0.6	theta	Non-aligned (intransitive)	24	right	posterior	-0.588963
-0.6	theta	Non-aligned (intransitive)	25	left	frontal	-0.27366
-0.6	theta	Non-aligned (intransitive)	25	left	central	-0.632975
-0.6	theta	Non-aligned (intransitive)	25	left	posterior	-0.938269
-0.6	theta	Non-aligned (intransitive)	25	mid	frontal	-0.23245
-0.6	theta	Non-aligned (intransitive)	25	mid	central	-0.466125
-0.6	theta	Non-aligned (intransitive)	25	mid	posterior	-0.200555
-0.6	theta	Non-aligned (intransitive)	25	right	frontal	-0.295091
-0.6	theta	Non-aligned (intransitive)	25	right	central	0.758628
-0.6	theta	Non-aligned (intransitive)	25	right	posterior	0.449146
-0.6	theta	Non-aligned (intransitive)	27	left	frontal	0.905269
-0.6	theta	Non-aligned (intransitive)	27	left	central	1.34824
-0.6	theta	Non-aligned (intransitive)	27	left	posterior	1.09499
-0.6	theta	Non-aligned (intransitive)	27	mid	frontal	0.567812
-0.6	theta	Non-aligned (intransitive)	27	mid	central	0.451566
-0.6	theta	Non-aligned (intransitive)	27	mid	posterior	2.03199
-0.6	theta	Non-aligned (intransitive)	27	right	frontal	-0.0551421
-0.6	theta	Non-aligned (intransitive)	27	right	central	0.0653786
-0.6	theta	Non-aligned (intransitive)	27	right	posterior	1.52462
-0.6	theta	Non-aligned (intransitive)	29	left	frontal	0.697074
-0.6	theta	Non-aligned (intransitive)	29	left	central	0.722134
-0.6	theta	Non-aligned (intransitive)	29	left	posterior	0.764109
-0.6	theta	Non-aligned (intransitive)	29	mid	frontal	0.703013
-0.6	theta	Non-aligned (intransitive)	29	mid	central	1.03136
-0.6	theta	Non-aligned (intransitive)	29	mid	posterior	0.768326
-0.6	theta	Non-aligned (intransitive)	29	right	frontal	1.09378
-0.6	theta	Non-aligned (intransitive)	29	right	central	1.33193
-0.6	theta	Non-aligned (intransitive)	29	right	posterior	1.50946
-0.6	theta	Non-aligned (intransitive)	3	left	frontal	-0.618399
-0.6	theta	Non-aligned (intransitive)	3	left	central	-0.110409
-0.6	theta	Non-aligned (intransitive)	3	left	posterior	0.617813
-0.6	theta	Non-aligned (intransitive)	3	mid	frontal	-0.488962
-0.6	theta	Non-aligned (intransitive)	3	mid	central	-0.571567
-0.6	theta	Non-aligned (intransitive)	3	mid	posterior	0.192939
-0.6	theta	Non-aligned (intransitive)	3	right	frontal	-0.434098
-0.6	theta	Non-aligned (intransitive)	3	right	central	-0.294362
-0.6	theta	Non-aligned (intransitive)	3	right	posterior	-0.14136
-0.6	theta	Non-aligned (intransitive)	31	left	frontal	-0.0951154
-0.6	theta	Non-aligned (intransitive)	31	left	central	0.96161
-0.6	theta	Non-aligned (intransitive)	31	left	posterior	1.76217
-0.6	theta	Non-aligned (intransitive)	31	mid	frontal	0.990815
-0.6	theta	Non-aligned (intransitive)	31	mid	central	0.153267
-0.6	theta	Non-aligned (intransitive)	31	mid	posterior	1.02431
-0.6	theta	Non-aligned (intransitive)	31	right	frontal	0.807715
-0.6	theta	Non-aligned (intransitive)	31	right	central	1.30175
-0.6	theta	Non-aligned (intransitive)	31	right	posterior	1.16824
-0.6	theta	Non-aligned (intransitive)	32	left	frontal	1.89382
-0.6	theta	Non-aligned (intransitive)	32	left	central	-2.20878
-0.6	theta	Non-aligned (intransitive)	32	left	posterior	-4.59584
-0.6	theta	Non-aligned (intransitive)	32	mid	frontal	0.0812056
-0.6	theta	Non-aligned (intransitive)	32	mid	central	-5.79162
-0.6	theta	Non-aligned (intransitive)	32	mid	posterior	-2.39826
-0.6	theta	Non-aligned (intransitive)	32	right	frontal	-5.4915
-0.6	theta	Non-aligned (intransitive)	32	right	central	-10.682
-0.6	theta	Non-aligned (intransitive)	32	right	posterior	-0.164456
-0.6	theta	Non-aligned (intransitive)	33	left	frontal	-0.504212
-0.6	theta	Non-aligned (intransitive)	33	left	central	0.101769
-0.6	theta	Non-aligned (intransitive)	33	left	posterior	-0.250592
-0.6	theta	Non-aligned (intransitive)	33	mid	frontal	-0.15403
-0.6	theta	Non-aligned (intransitive)	33	mid	central	-0.236016
-0.6	theta	Non-aligned (intransitive)	33	mid	posterior	-0.629047
-0.6	theta	Non-aligned (intransitive)	33	right	frontal	0.0543534
-0.6	theta	Non-aligned (intransitive)	33	right	central	-0.667391
-0.6	theta	Non-aligned (intransitive)	33	right	posterior	-0.822878
-0.6	theta	Non-aligned (intransitive)	35	left	frontal	0.647514
-0.6	theta	Non-aligned (intransitive)	35	left	central	0.0990116
-0.6	theta	Non-aligned (intransitive)	35	left	posterior	-0.69779
-0.6	theta	Non-aligned (intransitive)	35	mid	frontal	0.628062
-0.6	theta	Non-aligned (intransitive)	35	mid	central	0.249932
-0.6	theta	Non-aligned (intransitive)	35	mid	posterior	-0.678208
-0.6	theta	Non-aligned (intransitive)	35	right	frontal	0.282096
-0.6	theta	Non-aligned (intransitive)	35	right	central	0.00288419
-0.6	theta	Non-aligned (intransitive)	35	right	posterior	-0.059291
-0.6	theta	Non-aligned (intransitive)	37	left	frontal	0.682346
-0.6	theta	Non-aligned (intransitive)	37	left	central	0.373016
-0.6	theta	Non-aligned (intransitive)	37	left	posterior	0.298334
-0.6	theta	Non-aligned (intransitive)	37	mid	frontal	0.617192
-0.6	theta	Non-aligned (intransitive)	37	mid	central	0.655958
-0.6	theta	Non-aligned (intransitive)	37	mid	posterior	1.17145
-0.6	theta	Non-aligned (intransitive)	37	right	frontal	0.873883
-0.6	theta	Non-aligned (intransitive)	37	right	central	0.789716
-0.6	theta	Non-aligned (intransitive)	37	right	posterior	1.13233
-0.6	theta	Non-aligned (intransitive)	39	left	frontal	0.128902
-0.6	theta	Non-aligned (intransitive)	39	left	central	0.213793
-0.6	theta	Non-aligned (intransitive)	39	left	posterior	0.412989
-0.6	theta	Non-aligned (intransitive)	39	mid	frontal	0.0124995
-0.6	theta	Non-aligned (intransitive)	39	mid	central	-0.184423
-0.6	theta	Non-aligned (intransitive)	39	mid	posterior	0.622118
-0.6	theta	Non-aligned (intransitive)	39	right	frontal	-0.465071
-0.6	theta	Non-aligned (intransitive)	39	right	central	0.00697496
-0.6	theta	Non-aligned (intransitive)	39	right	posterior	0.260684
-0.6	theta	Non-aligned (intransitive)	41	left	frontal	0.613879
-0.6	theta	Non-aligned (intransitive)	41	left	central	-0.345789
-0.6	theta	Non-aligned (intransitive)	41	left	posterior	-0.341632
-0.6	theta	Non-aligned (intransitive)	41	mid	frontal	0.212345
-0.6	theta	Non-aligned (intransitive)	41	mid	central	-0.460035
-0.6	theta	Non-aligned (intransitive)	41	mid	posterior	-0.438042
-0.6	theta	Non-aligned (intransitive)	41	right	frontal	0.60302
-0.6	theta	Non-aligned (intransitive)	41	right	central	0.256832
-0.6	theta	Non-aligned (intransitive)	41	right	posterior	0.187989
-0.6	theta	Non-aligned (intransitive)	43	left	frontal	-0.491072
-0.6	theta	Non-aligned (intransitive)	43	left	central	-0.0383539
-0.6	theta	Non-aligned (intransitive)	43	left	posterior	-0.293143
-0.6	theta	Non-aligned (intransitive)	43	mid	frontal	-0.411182
-0.6	theta	Non-aligned (intransitive)	43	mid	central	-0.626285
-0.6	theta	Non-aligned (intransitive)	43	mid	posterior	-0.665037
-0.6	theta	Non-aligned (intransitive)	43	right	frontal	-0.28581
-0.6	theta	Non-aligned (intransitive)	43	right	central	-0.277878
-0.6	theta	Non-aligned (intransitive)	43	right	posterior	-0.22983
-0.6	theta	Non-aligned (intransitive)	45	left	frontal	0.974084
-0.6	theta	Non-aligned (intransitive)	45	left	central	0.779109
-0.6	theta	Non-aligned (intransitive)	45	left	posterior	0.399648
-0.6	theta	Non-aligned (intransitive)	45	mid	frontal	1.05004
-0.6	theta	Non-aligned (intransitive)	45	mid	central	0.803448
-0.6	theta	Non-aligned (intransitive)	45	mid	posterior	0.760082
-0.6	theta	Non-aligned (intransitive)	45	right	frontal	0.691687
-0.6	theta	Non-aligned (intransitive)	45	right	central	0.743731
-0.6	theta	Non-aligned (intransitive)	45	right	posterior	0.685499
-0.6	theta	Non-aligned (intransitive)	47	left	frontal	-0.0933573
-0.6	theta	Non-aligned (intransitive)	47	left	central	-0.337514
-0.6	theta	Non-aligned (intransitive)	47	left	posterior	-0.272852
-0.6	theta	Non-aligned (intransitive)	47	mid	frontal	-0.669023
-0.6	theta	Non-aligned (intransitive)	47	mid	central	-0.154803
-0.6	theta	Non-aligned (intransitive)	47	mid	posterior	-0.841032
-0.6	theta	Non-aligned (intransitive)	47	right	frontal	-0.288741
-0.6	theta	Non-aligned (intransitive)	47	right	central	0.665468
-0.6	theta	Non-aligned (intransitive)	47	right	posterior	-0.0283395
-0.6	theta	Non-aligned (intransitive)	49	left	frontal	-0.338301
-0.6	theta	Non-aligned (intransitive)	49	left	central	-0.362813
-0.6	theta	Non-aligned (intransitive)	49	left	posterior	-0.0895248
-0.6	theta	Non-aligned (intransitive)	49	mid	frontal	-0.917946
-0.6	theta	Non-aligned (intransitive)	49	mid	central	-0.692665
-0.6	theta	Non-aligned (intransitive)	49	mid	posterior	-0.303142
-0.6	theta	Non-aligned (intransitive)	49	right	frontal	-0.794868
-0.6	theta	Non-aligned (intransitive)	49	right	central	-0.8034
-0.6	theta	Non-aligned (intransitive)	49	right	posterior	-0.25608
-0.6	theta	Non-aligned (intransitive)	5	left	frontal	-0.18113
-0.6	theta	Non-aligned (intransitive)	5	left	central	-1.00283
-0.6	theta	Non-aligned (intransitive)	5	left	posterior	-0.875554
-0.6	theta	Non-aligned (intransitive)	5	mid	frontal	0.0952379
-0.6	theta	Non-aligned (intransitive)	5	mid	central	-0.457481
-0.6	theta	Non-aligned (intransitive)	5	mid	posterior	-0.923499
-0.6	theta	Non-aligned (intransitive)	5	right	frontal	0.222765
-0.6	theta	Non-aligned (intransitive)	5	right	central	0.376068
-0.6	theta	Non-aligned (intransitive)	5	right	posterior	0.894554
-0.6	theta	Non-aligned (intransitive)	50	left	frontal	6.35549
-0.6	theta	Non-aligned (intransitive)	50	left	central	3.89934
-0.6	theta	Non-aligned (intransitive)	50	left	posterior	2.42575
-0.6	theta	Non-aligned (intransitive)	50	mid	frontal	4.31499
-0.6	theta	Non-aligned (intransitive)	50	mid	central	2.90664
-0.6	theta	Non-aligned (intransitive)	50	mid	posterior	0
-0.6	theta	Non-aligned (intransitive)	50	right	frontal	0.0322442
-0.6	theta	Non-aligned (intransitive)	50	right	central	-1.75277
-0.6	theta	Non-aligned (intransitive)	50	right	posterior	-5.82015
-0.6	theta	Non-aligned (intransitive)	7	left	frontal	0.100927
-0.6	theta	Non-aligned (intransitive)	7	left	central	0.169524
-0.6	theta	Non-aligned (intransitive)	7	left	posterior	0.161979
-0.6	theta	Non-aligned (intransitive)	7	mid	frontal	-0.297901
-0.6	theta	Non-aligned (intransitive)	7	mid	central	-0.209785
-0.6	theta	Non-aligned (intransitive)	7	mid	posterior	-0.62872
-0.6	theta	Non-aligned (intransitive)	7	right	frontal	-0.527181
-0.6	theta	Non-aligned (intransitive)	7	right	central	-0.214272
-0.6	theta	Non-aligned (intransitive)	7	right	posterior	-0.476817
-0.6	theta	Non-aligned (intransitive)	9	left	frontal	-0.611994
-0.6	theta	Non-aligned (intransitive)	9	left	central	-0.626589
-0.6	theta	Non-aligned (intransitive)	9	left	posterior	-0.258316
-0.6	theta	Non-aligned (intransitive)	9	mid	frontal	-0.168701
-0.6	theta	Non-aligned (intransitive)	9	mid	central	-0.768167
-0.6	theta	Non-aligned (intransitive)	9	mid	posterior	-0.847145
-0.6	theta	Non-aligned (intransitive)	9	right	frontal	-0.58846
-0.6	theta	Non-aligned (intransitive)	9	right	central	-1.44255
-0.6	theta	Non-aligned (intransitive)	9	right	posterior	-0.810682
-0.5	theta	Aligned (transitive)	10	left	frontal	-0.019261
-0.5	theta	Aligned (transitive)	10	left	central	-0.00820186
-0.5	theta	Aligned (transitive)	10	left	posterior	0.1409
-0.5	theta	Aligned (transitive)	10	mid	frontal	0.173869
-0.5	theta	Aligned (transitive)	10	mid	central	-0.719896
-0.5	theta	Aligned (transitive)	10	mid	posterior	-0.224458
-0.5	theta	Aligned (transitive)	10	right	frontal	-0.460398
-0.5	theta	Aligned (transitive)	10	right	central	-0.237831
-0.5	theta	Aligned (transitive)	10	right	posterior	0.522388
-0.5	theta	Aligned (transitive)	12	left	frontal	-0.477861
-0.5	theta	Aligned (transitive)	12	left	central	-0.163541
-0.5	theta	Aligned (transitive)	12	left	posterior	-0.106939
-0.5	theta	Aligned (transitive)	12	mid	frontal	0.22154
-0.5	theta	Aligned (transitive)	12	mid	central	-0.125543
-0.5	theta	Aligned (transitive)	12	mid	posterior	-0.115233
-0.5	theta	Aligned (transitive)	12	right	frontal	0.271441
-0.5	theta	Aligned (transitive)	12	right	central	0.391102
-0.5	theta	Aligned (transitive)	12	right	posterior	-0.157158
-0.5	theta	Aligned (transitive)	14	left	frontal	-0.557512
-0.5	theta	Aligned (transitive)	14	left	central	-0.565069
-0.5	theta	Aligned (transitive)	14	left	posterior	-0.598981
-0.5	theta	Aligned (transitive)	14	mid	frontal	-0.268287
-0.5	theta	Aligned (transitive)	14	mid	central	-0.682641
-0.5	theta	Aligned (transitive)	14	mid	posterior	-0.584197
-0.5	theta	Aligned (transitive)	14	right	frontal	-0.406597
-0.5	theta	Aligned (transitive)	14	right	central	-0.370355
-0.5	theta	Aligned (transitive)	14	right	posterior	-0.405265
-0.5	theta	Aligned (transitive)	16	left	frontal	-1.25599
-0.5	theta	Aligned (transitive)	16	left	central	-0.775743
-0.5	theta	Aligned (transitive)	16	left	posterior	-0.587754
-0.5	theta	Aligned (transitive)	16	mid	frontal	-0.899444
-0.5	theta	Aligned (transitive)	16	mid	central	-1.45307
-0.5	theta	Aligned (transitive)	16	mid	posterior	-1.39974
-0.5	theta	Aligned (transitive)	16	right	frontal	-0.310483
-0.5	theta	Aligned (transitive)	16	right	central	-0.498586
-0.5	theta	Aligned (transitive)	16	right	posterior	-1.12458
-0.5	theta	Aligned (transitive)	18	left	frontal	-0.399672
-0.5	theta	Aligned (transitive)	18	left	central	0.00975226
-0.5	theta	Aligned (transitive)	18	left	posterior	0.24027
-0.5	theta	Aligned (transitive)	18	mid	frontal	-0.246003
-0.5	theta	Aligned (transitive)	18	mid	central	-0.259032
-0.5	theta	Aligned (transitive)	18	mid	posterior	0.493109
-0.5	theta	Aligned (transitive)	18	right	frontal	0.0963621
-0.5	theta	Aligned (transitive)	18	right	central	0.274287
-0.5	theta	Aligned (transitive)	18	right	posterior	0.468056
-0.5	theta	Aligned (transitive)	2	left	frontal	-0.938177
-0.5	theta	Aligned (transitive)	2	left	central	-1.09827
-0.5	theta	Aligned (transitive)	2	left	posterior	-0.857988
-0.5	theta	Aligned (transitive)	2	mid	frontal	-1.22396
-0.5	theta	Aligned (transitive)	2	mid	central	-1.29581
-0.5	theta	Aligned (transitive)	2	mid	posterior	-0.981251
-0.5	theta	Aligned (transitive)	2	right	frontal	-1.07242
-0.5	theta	Aligned (transitive)	2	right	central	-0.93595
-0.5	theta	Aligned (transitive)	2	right	posterior	-0.55316
-0.5	theta	Aligned (transitive)	20	left	frontal	-0.704519
-0.5	theta	Aligned (transitive)	20	left	central	0.106735
-0.5	theta	Aligned (transitive)	20	left	posterior	0.312439
-0.5	theta	Aligned (transitive)	20	mid	frontal	-0.863705
-0.5	theta	Aligned (transitive)	20	mid	central	1.13827
-0.5	theta	Aligned (transitive)	20	mid	posterior	1.89758
-0.5	theta	Aligned (transitive)	20	right	frontal	-0.0756318
-0.5	theta	Aligned (transitive)	20	right	central	1.39005
-0.5	theta	Aligned (transitive)	20	right	posterior	1.36658
-0.5	theta	Aligned (transitive)	22	left	frontal	-0.493851
-0.5	theta	Aligned (transitive)	22	left	central	-0.193644
-0.5	theta	Aligned (transitive)	22	left	posterior	-0.492439
-0.5	theta	Aligned (transitive)	22	mid	frontal	0.0271837
-0.5	theta	Aligned (transitive)	22	mid	central	-0.434266
-0.5	theta	Aligned (transitive)	22	mid	posterior	-0.892864
-0.5	theta	Aligned (transitive)	22	right	frontal	-0.302049
-0.5	theta	Aligned (transitive)	22	right	central	-0.833031
-0.5	theta	Aligned (transitive)	22	right	posterior	-0.748595
-0.5	theta	Aligned (transitive)	24	left	frontal	-0.147146
-0.5	theta	Aligned (transitive)	24	left	central	-0.152611
-0.5	theta	Aligned (transitive)	24	left	posterior	-0.791126
-0.5	theta	Aligned (transitive)	24	mid	frontal	0.192586
-0.5	theta	Aligned (transitive)	24	mid	central	0.402285
-0.5	theta	Aligned (transitive)	24	mid	posterior	-0.300009
-0.5	theta	Aligned (transitive)	24	right	frontal	1.30715
-0.5	theta	Aligned (transitive)	24	right	central	1.10371
-0.5	theta	Aligned (transitive)	24	right	posterior	0.405761
-0.5	theta	Aligned (transitive)	26	left	frontal	0.106411
-0.5	theta	Aligned (transitive)	26	left	central	0.0596205
-0.5	theta	Aligned (transitive)	26	left	posterior	-0.0890228
-0.5	theta	Aligned (transitive)	26	mid	frontal	0.115759
-0.5	theta	Aligned (transitive)	26	mid	central	0.123501
-0.5	theta	Aligned (transitive)	26	mid	posterior	-0.291368
-0.5	theta	Aligned (transitive)	26	right	frontal	0.0596245
-0.5	theta	Aligned (transitive)	26	right	central	0.0725373
-0.5	theta	Aligned (transitive)	26	right	posterior	-0.0406076
-0.5	theta	Aligned (transitive)	28	left	frontal	-1.35257
-0.5	theta	Aligned (transitive)	28	left	central	-0.126983
-0.5	theta	Aligned (transitive)	28	left	posterior	0.0144582
-0.5	theta	Aligned (transitive)	28	mid	frontal	-0.788685
-0.5	theta	Aligned (transitive)	28	mid	central	-0.0647537
-0.5	theta	Aligned (transitive)	28	mid	posterior	0.531791
-0.5	theta	Aligned (transitive)	28	right	frontal	-0.166733
-0.5	theta	Aligned (transitive)	28	right	central	0.319412
-0.5	theta	Aligned (transitive)	28	right	posterior	0.408094
-0.5	theta	Aligned (transitive)	30	left	frontal	0.00685969
-0.5	theta	Aligned (transitive)	30	left	central	0.836554
-0.5	theta	Aligned (transitive)	30	left	posterior	0.531069
-0.5	theta	Aligned (transitive)	30	mid	frontal	-0.122695
-0.5	theta	Aligned (transitive)	30	mid	central	0.189014
-0.5	theta	Aligned (transitive)	30	mid	posterior	-0.0684572
-0.5	theta	Aligned (transitive)	30	right	frontal	-0.136474
-0.5	theta	Aligned (transitive)	30	right	central	-0.289573
-0.5	theta	Aligned (transitive)	30	right	posterior	-0.649418
-0.5	theta	Aligned (transitive)	32	left	frontal	-1.31829
-0.5	theta	Aligned (transitive)	32	left	central	-0.335848
-0.5	theta	Aligned (transitive)	32	left	posterior	0.140421
-0.5	theta	Aligned (transitive)	32	mid	frontal	-0.639256
-0.5	theta	Aligned (transitive)	32	mid	central	-0.538796
-0.5	theta	Aligned (transitive)	32	mid	posterior	0.41493
-0.5	theta	Aligned (transitive)	32	right	frontal	0.021726
-0.5	theta	Aligned (transitive)	32	right	central	-0.0354282
-0.5	theta	Aligned (transitive)	32	right	posterior	-0.180543
-0.5	theta	Aligned (transitive)	34	left	frontal	-0.387411
-0.5	theta	Aligned (transitive)	34	left	central	-0.0841827
-0.5	theta	Aligned (transitive)	34	left	posterior	-0.0747848
-0.5	theta	Aligned (transitive)	34	mid	frontal	-0.226592
-0.5	theta	Aligned (transitive)	34	mid	central	-0.377658
-0.5	theta	Aligned (transitive)	34	mid	posterior	-0.681475
-0.5	theta	Aligned (transitive)	34	right	frontal	-0.773094
-0.5	theta	Aligned (transitive)	34	right	central	-0.048997
-0.5	theta	Aligned (transitive)	34	right	posterior	-0.169577
-0.5	theta	Aligned (transitive)	36	left	frontal	-0.167888
-0.5	theta	Aligned (transitive)	36	left	central	-0.75386
-0.5	theta	Aligned (transitive)	36	left	posterior	-0.568926
-0.5	theta	Aligned (transitive)	36	mid	frontal	0.300652
-0.5	theta	Aligned (transitive)	36	mid	central	-0.351222
-0.5	theta	Aligned (transitive)	36	mid	posterior	-0.48902
-0.5	theta	Aligned (transitive)	36	right	frontal	-0.199035
-0.5	theta	Aligned (transitive)	36	right	central	-0.591085
-0.5	theta	Aligned (transitive)	36	right	posterior	-0.882138
-0.5	theta	Aligned (transitive)	38	left	frontal	-0.240552
-0.5	theta	Aligned (transitive)	38	left	central	-0.330561
-0.5	theta	Aligned (transitive)	38	left	posterior	0.149597
-0.5	theta	Aligned (transitive)	38	mid	frontal	-0.188568
-0.5	theta	Aligned (transitive)	38	mid	central	-0.723338
-0.5	theta	Aligned (transitive)	38	mid	posterior	0.00185796
-0.5	theta	Aligned (transitive)	38	right	frontal	-0.536338
-0.5	theta	Aligned (transitive)	38	right	central	-0.209343
-0.5	theta	Aligned (transitive)	38	right	posterior	0.145327
-0.5	theta	Aligned (transitive)	4	left	frontal	-0.101047
-0.5	theta	Aligned (transitive)	4	left	central	-0.232344
-0.5	theta	Aligned (transitive)	4	left	posterior	-0.293216
-0.5	theta	Aligned (transitive)	4	mid	frontal	-0.242152
-0.5	theta	Aligned (transitive)	4	mid	central	-0.337644
-0.5	theta	Aligned (transitive)	4	mid	posterior	-0.158215
-0.5	theta	Aligned (transitive)	4	right	frontal	-0.486454
-0.5	theta	Aligned (transitive)	4	right	central	-0.219797
-0.5	theta	Aligned (transitive)	4	right	posterior	0.0870027
-0.5	theta	Aligned (transitive)	40	left	frontal	-0.0809568
-0.5	theta	Aligned (transitive)	40	left	central	-0.0190189
-0.5	theta	Aligned (transitive)	40	left	posterior	-0.117269
-0.5	theta	Aligned (transitive)	40	mid	frontal	0.00107336
-0.5	theta	Aligned (transitive)	40	mid	central	0.281956
-0.5	theta	Aligned (transitive)	40	mid	posterior	0.147087
-0.5	theta	Aligned (transitive)	40	right	frontal	0.314289
-0.5	theta	Aligned (transitive)	40	right	central	0.657957
-0.5	theta	Aligned (transitive)	40	right	posterior	0.486968
-0.5	theta	Aligned (transitive)	42	left	frontal	-0.127458
-0.5	theta	Aligned (transitive)	42	left	central	-0.598724
-0.5	theta	Aligned (transitive)	42	left	posterior	-0.279522
-0.5	theta	Aligned (transitive)	42	mid	frontal	-0.540661
-0.5	theta	Aligned (transitive)	42	mid	central	-0.319883
-0.5	theta	Aligned (transitive)	42	mid	posterior	-0.402076
-0.5	theta	Aligned (transitive)	42	right	frontal	0.033836
-0.5	theta	Aligned (transitive)	42	right	central	-0.237708
-0.5	theta	Aligned (transitive)	42	right	posterior	-0.279575
-0.5	theta	Aligned (transitive)	44	left	frontal	0.367608
-0.5	theta	Aligned (transitive)	44	left	central	0.208139
-0.5	theta	Aligned (transitive)	44	left	posterior	-0.226643
-0.5	theta	Aligned (transitive)	44	mid	frontal	0.302575
-0.5	theta	Aligned (transitive)	44	mid	central	0.306926
-0.5	theta	Aligned (transitive)	44	mid	posterior	-0.0520332
-0.5	theta	Aligned (transitive)	44	right	frontal	0.284233
-0.5	theta	Aligned (transitive)	44	right	central	0.255468
-0.5	theta	Aligned (transitive)	44	right	posterior	0.295742
-0.5	theta	Aligned (transitive)	46	left	frontal	-0.0962816
-0.5	theta	Aligned (transitive)	46	left	central	-0.0300127
-0.5	theta	Aligned (transitive)	46	left	posterior	-0.0228699
-0.5	theta	Aligned (transitive)	46	mid	frontal	0.355825
-0.5	theta	Aligned (transitive)	46	mid	central	-0.475773
-0.5	theta	Aligned (transitive)	46	mid	posterior	-0.293973
-0.5	theta	Aligned (transitive)	46	right	frontal	0.234418
-0.5	theta	Aligned (transitive)	46	right	central	-0.0873542
-0.5	theta	Aligned (transitive)	46	right	posterior	-0.271747
-0.5	theta	Aligned (transitive)	48	left	frontal	0.43374
-0.5	theta	Aligned (transitive)	48	left	central	0.414038
-0.5	theta	Aligned (transitive)	48	left	posterior	0.341209
-0.5	theta	Aligned (transitive)	48	mid	frontal	0.392822
-0.5	theta	Aligned (transitive)	48	mid	central	0.466012
-0.5	theta	Aligned (transitive)	48	mid	posterior	-0.0151349
-0.5	theta	Aligned (transitive)	48	right	frontal	0.512373
-0.5	theta	Aligned (transitive)	48	right	central	0.462774
-0.5	theta	Aligned (transitive)	48	right	posterior	0.343831
-0.5	theta	Aligned (transitive)	50	left	frontal	-0.438836
-0.5	theta	Aligned (transitive)	50	left	central	-0.679827
-0.5	theta	Aligned (transitive)	50	left	posterior	-0.400379
-0.5	theta	Aligned (transitive)	50	mid	frontal	-0.0351207
-0.5	theta	Aligned (transitive)	50	mid	central	-0.426733
-0.5	theta	Aligned (transitive)	50	mid	posterior	-0.587429
-0.5	theta	Aligned (transitive)	50	right	frontal	-0.057176
-0.5	theta	Aligned (transitive)	50	right	central	-0.394198
-0.5	theta	Aligned (transitive)	50	right	posterior	-0.633536
-0.5	theta	Aligned (transitive)	6	left	frontal	0.174291
-0.5	theta	Aligned (transitive)	6	left	central	-0.157491
-0.5	theta	Aligned (transitive)	6	left	posterior	-0.000767536
-0.5	theta	Aligned (transitive)	6	mid	frontal	-0.139158
-0.5	theta	Aligned (transitive)	6	mid	central	-0.0200936
-0.5	theta	Aligned (transitive)	6	mid	posterior	0.0674255
-0.5	theta	Aligned (transitive)	6	right	frontal	0.152806
-0.5	theta	Aligned (transitive)	6	right	central	0.305405
-0.5	theta	Aligned (transitive)	6	right	posterior	-0.00463922
-0.5	theta	Aligned (transitive)	8	left	frontal	-0.9112
-0.5	theta	Aligned (transitive)	8	left	central	-0.18826
-0.5	theta	Aligned (transitive)	8	left	posterior	-0.0227462
-0.5	theta	Aligned (transitive)	8	mid	frontal	-0.754184
-0.5	theta	Aligned (transitive)	8	mid	central	-0.281588
-0.5	theta	Aligned (transitive)	8	mid	posterior	-0.277408
-0.5	theta	Aligned (transitive)	8	right	frontal	-0.646227
-0.5	theta	Aligned (transitive)	8	right	central	-0.209718
-0.5	theta	Aligned (transitive)	8	right	posterior	-0.283259
-0.5	theta	Non-aligned (transitive)	1	left	frontal	-0.896723
-0.5	theta	Non-aligned (transitive)	1	left	central	-0.644183
-0.5	theta	Non-aligned (transitive)	1	left	posterior	-0.284285
-0.5	theta	Non-aligned (transitive)	1	mid	frontal	-1.41744
-0.5	theta	Non-aligned (transitive)	1	mid	central	-1.2724
-0.5	theta	Non-aligned (transitive)	1	mid	posterior	-0.568618
-0.5	theta	Non-aligned (transitive)	1	right	frontal	-1.52038
-0.5	theta	Non-aligned (transitive)	1	right	central	-0.767768
-0.5	theta	Non-aligned (transitive)	1	right	posterior	-0.617263
-0.5	theta	Non-aligned (transitive)	11	left	frontal	-0.116854
-0.5	theta	Non-aligned (transitive)	11	left	central	0.540392
-0.5	theta	Non-aligned (transitive)	11	left	posterior	1.04832
-0.5	theta	Non-aligned (transitive)	11	mid	frontal	-0.770743
-0.5	theta	Non-aligned (transitive)	11	mid	central	-0.234366
-0.5	theta	Non-aligned (transitive)	11	mid	posterior	0.504166
-0.5	theta	Non-aligned (transitive)	11	right	frontal	-0.369049
-0.5	theta	Non-aligned (transitive)	11	right	central	-0.26938
-0.5	theta	Non-aligned (transitive)	11	right	posterior	0.0924957
-0.5	theta	Non-aligned (transitive)	13	left	frontal	-0.503566
-0.5	theta	Non-aligned (transitive)	13	left	central	-0.0334606
-0.5	theta	Non-aligned (transitive)	13	left	posterior	0.683259
-0.5	theta	Non-aligned (transitive)	13	mid	frontal	-0.0649264
-0.5	theta	Non-aligned (transitive)	13	mid	central	-0.33013
-0.5	theta	Non-aligned (transitive)	13	mid	posterior	0.642807
-0.5	theta	Non-aligned (transitive)	13	right	frontal	-0.332783
-0.5	theta	Non-aligned (transitive)	13	right	central	-0.233196
-0.5	theta	Non-aligned (transitive)	13	right	posterior	0.456634
-0.5	theta	Non-aligned (transitive)	15	left	frontal	-0.408635
-0.5	theta	Non-aligned (transitive)	15	left	central	-0.694424
-0.5	theta	Non-aligned (transitive)	15	left	posterior	-0.46717
-0.5	theta	Non-aligned (transitive)	15	mid	frontal	-0.934834
-0.5	theta	Non-aligned (transitive)	15	mid	central	-0.6573
-0.5	theta	Non-aligned (transitive)	15	mid	posterior	-0.401118
-0.5	theta	Non-aligned (transitive)	15	right	frontal	-1.0472
-0.5	theta	Non-aligned (transitive)	15	right	central	-0.382492
-0.5	theta	Non-aligned (transitive)	15	right	posterior	-0.397036
-0.5	theta	Non-aligned (transitive)	17	left	frontal	0.215226
-0.5	theta	Non-aligned (transitive)	17	left	central	0.238224
-0.5	theta	Non-aligned (transitive)	17	left	posterior	0.200853
-0.5	theta	Non-aligned (transitive)	17	mid	frontal	0.0850982
-0.5	theta	Non-aligned (transitive)	17	mid	central	0.501229
-0.5	theta	Non-aligned (transitive)	17	mid	posterior	0.0464613
-0.5	theta	Non-aligned (transitive)	17	right	frontal	0.289859
-0.5	theta	Non-aligned (transitive)	17	right	central	0.345383
-0.5	theta	Non-aligned (transitive)	17	right	posterior	0.310333
-0.5	theta	Non-aligned (transitive)	19	left	frontal	-0.884433
-0.5	theta	Non-aligned (transitive)	19	left	central	-0.507364
-0.5	theta	Non-aligned (transitive)	19	left	posterior	-0.00782248
-0.5	theta	Non-aligned (transitive)	19	mid	frontal	-0.889695
-0.5	theta	Non-aligned (transitive)	19	mid	central	-1.01521
-0.5	theta	Non-aligned (transitive)	19	mid	posterior	-0.362507
-0.5	theta	Non-aligned (transitive)	19	right	frontal	-0.694247
-0.5	theta	Non-aligned (transitive)	19	right	central	-0.925011
-0.5	theta	Non-aligned (transitive)	19	right	posterior	-0.301994
-0.5	theta	Non-aligned (transitive)	21	left	frontal	-0.0413337
-0.5	theta	Non-aligned (transitive)	21	left	central	-0.0416483
-0.5	theta	Non-aligned (transitive)	21	left	posterior	0.255829
-0.5	theta	Non-aligned (transitive)	21	mid	frontal	0.501556
-0.5	theta	Non-aligned (transitive)	21	mid	central	-0.25511
-0.5	theta	Non-aligned (transitive)	21	mid	posterior	-0.484788
-0.5	theta	Non-aligned (transitive)	21	right	frontal	-0.202195
-0.5	theta	Non-aligned (transitive)	21	right	central	-0.162329
-0.5	theta	Non-aligned (transitive)	21	right	posterior	0.0196573
-0.5	theta	Non-aligned (transitive)	23	left	frontal	-0.477141
-0.5	theta	Non-aligned (transitive)	23	left	central	0.391995
-0.5	theta	Non-aligned (transitive)	23	left	posterior	0.247691
-0.5	theta	Non-aligned (transitive)	23	mid	frontal	-0.446178
-0.5	theta	Non-aligned (transitive)	23	mid	central	-0.598489
-0.5	theta	Non-aligned (transitive)	23	mid	posterior	0.00958722
-0.5	theta	Non-aligned (transitive)	23	right	frontal	-0.456004
-0.5	theta	Non-aligned (transitive)	23	right	central	-0.236429
-0.5	theta	Non-aligned (transitive)	23	right	posterior	-0.352074
-0.5	theta	Non-aligned (transitive)	24	left	frontal	3.02857
-0.5	theta	Non-aligned (transitive)	24	left	central	2.28308
-0.5	theta	Non-aligned (transitive)	24	left	posterior	-0.898833
-0.5	theta	Non-aligned (transitive)	24	mid	frontal	-0.115265
-0.5	theta	Non-aligned (transitive)	24	mid	central	1.49617
-0.5	theta	Non-aligned (transitive)	24	mid	posterior	-3.68805
-0.5	theta	Non-aligned (transitive)	24	right	frontal	-0.238756
-0.5	theta	Non-aligned (transitive)	24	right	central	-0.693695
-0.5	theta	Non-aligned (transitive)	24	right	posterior	-2.49495
-0.5	theta	Non-aligned (transitive)	25	left	frontal	0.0454038
-0.5	theta	Non-aligned (transitive)	25	left	central	0.311579
-0.5	theta	Non-aligned (transitive)	25	left	posterior	-0.117089
-0.5	theta	Non-aligned (transitive)	25	mid	frontal	-0.683023
-0.5	theta	Non-aligned (transitive)	25	mid	central	-0.411594
-0.5	theta	Non-aligned (transitive)	25	mid	posterior	-0.0878232
-0.5	theta	Non-aligned (transitive)	25	right	frontal	-0.653073
-0.5	theta	Non-aligned (transitive)	25	right	central	-0.127773
-0.5	theta	Non-aligned (transitive)	25	right	posterior	-0.275688
-0.5	theta	Non-aligned (transitive)	27	left	frontal	-0.321127
-0.5	theta	Non-aligned (transitive)	27	left	central	0.47089
-0.5	theta	Non-aligned (transitive)	27	left	posterior	1.09212
-0.5	theta	Non-aligned (transitive)	27	mid	frontal	-0.293276
-0.5	theta	Non-aligned (transitive)	27	mid	central	0.868741
-0.5	theta	Non-aligned (transitive)	27	mid	posterior	0.867792
-0.5	theta	Non-aligned (transitive)	27	right	frontal	0.54811
-0.5	theta	Non-aligned (transitive)	27	right	central	0.968313
-0.5	theta	Non-aligned (transitive)	27	right	posterior	0.539862
-0.5	theta	Non-aligned (transitive)	29	left	frontal	-0.173364
-0.5	theta	Non-aligned (transitive)	29	left	central	-0.466988
-0.5	theta	Non-aligned (transitive)	29	left	posterior	-0.08849
-0.5	theta	Non-aligned (transitive)	29	mid	frontal	-0.742971
-0.5	theta	Non-aligned (transitive)	29	mid	central	-0.341748
-0.5	theta	Non-aligned (transitive)	29	mid	posterior	-0.487832
-0.5	theta	Non-aligned (transitive)	29	right	frontal	-0.341357
-0.5	theta	Non-aligned (transitive)	29	right	central	0.126618
-0.5	theta	Non-aligned (transitive)	29	right	posterior	-0.316805
-0.5	theta	Non-aligned (transitive)	3	left	frontal	-0.379343
-0.5	theta	Non-aligned (transitive)	3	left	central	-0.134967
-0.5	theta	Non-aligned (transitive)	3	left	posterior	0.157445
-0.5	theta	Non-aligned (transitive)	3	mid	frontal	-0.437846
-0.5	theta	Non-aligned (transitive)	3	mid	central	-0.13511
-0.5	theta	Non-aligned (transitive)	3	mid	posterior	-0.0594109
-0.5	theta	Non-aligned (transitive)	3	right	frontal	-0.0944808
-0.5	theta	Non-aligned (transitive)	3	right	central	0.105438
-0.5	theta	Non-aligned (transitive)	3	right	posterior	0.0958089
-0.5	theta	Non-aligned (transitive)	31	left	frontal	-0.288649
-0.5	theta	Non-aligned (transitive)	31	left	central	-0.0145795
-0.5	theta	Non-aligned (transitive)	31	left	posterior	0.262628
-0.5	theta	Non-aligned (transitive)	31	mid	frontal	-1.87134
-0.5	theta	Non-aligned (transitive)	31	mid	central	-1.4143
-0.5	theta	Non-aligned (transitive)	31	mid	posterior	-1.43217
-0.5	theta	Non-aligned (transitive)	31	right	frontal	-1.45373
-0.5	theta	Non-aligned (transitive)	31	right	central	-0.718873
-0.5	theta	Non-aligned (transitive)	31	right	posterior	-1.10268
-0.5	theta	Non-aligned (transitive)	33	left	frontal	-1.07755
-0.5	theta	Non-aligned (transitive)	33	left	central	-1.21211
-0.5	theta	Non-aligned (transitive)	33	left	posterior	-0.102027
-0.5	theta	Non-aligned (transitive)	33	mid	frontal	-0.768136
-0.5	theta	Non-aligned (transitive)	33	mid	central	-0.901429
-0.5	theta	Non-aligned (transitive)	33	mid	posterior	0.0235085
-0.5	theta	Non-aligned (transitive)	33	right	frontal	-1.04402
-0.5	theta	Non-aligned (transitive)	33	right	central	-0.544352
-0.5	theta	Non-aligned (transitive)	33	right	posterior	-0.244341
-0.5	theta	Non-aligned (transitive)	35	left	frontal	-0.259491
-0.5	theta	Non-aligned (transitive)	35	left	central	-0.522521
-0.5	theta	Non-aligned (transitive)	35	left	posterior	-0.402477
-0.5	theta	Non-aligned (transitive)	35	mid	frontal	-0.42516
-0.5	theta	Non-aligned (transitive)	35	mid	central	-0.467595
-0.5	theta	Non-aligned (transitive)	35	mid	posterior	-0.575575
-0.5	theta	Non-aligned (transitive)	35	right	frontal	-0.583867
-0.5	theta	Non-aligned (transitive)	35	right	central	-0.763775
-0.5	theta	Non-aligned (transitive)	35	right	posterior	-0.54433
-0.5	theta	Non-aligned (transitive)	37	left	frontal	1.69425
-0.5	theta	Non-aligned (transitive)	37	left	central	1.29066
-0.5	theta	Non-aligned (transitive)	37	left	posterior	0.613371
-0.5	theta	Non-aligned (transitive)	37	mid	frontal	0.678414
-0.5	theta	Non-aligned (transitive)	37	mid	central	1.43897
-0.5	theta	Non-aligned (transitive)	37	mid	posterior	1.11419
-0.5	theta	Non-aligned (transitive)	37	right	frontal	0.765457
-0.5	theta	Non-aligned (transitive)	37	right	central	1.27008
-0.5	theta	Non-aligned (transitive)	37	right	posterior	0.779219
-0.5	theta	Non-aligned (transitive)	39	left	frontal	-0.290849
-0.5	theta	Non-aligned (transitive)	39	left	central	0.00733702
-0.5	theta	Non-aligned (transitive)	39	left	posterior	-0.227214
-0.5	theta	Non-aligned (transitive)	39	mid	frontal	-0.12693
-0.5	theta	Non-aligned (transitive)	39	mid	central	-0.170792
-0.5	theta	Non-aligned (transitive)	39	mid	posterior	-0.128322
-0.5	theta	Non-aligned (transitive)	39	right	frontal	0.0624076
-0.5	theta	Non-aligned (transitive)	39	right	central	-0.160749
-0.5	theta	Non-aligned (transitive)	39	right	posterior	0.0268216
-0.5	theta	Non-aligned (transitive)	4	left	frontal	-0.517224
-0.5	theta	Non-aligned (transitive)	4	left	central	-0.192853
-0.5	theta	Non-aligned (transitive)	4	left	posterior	-0.90107
-0.5	theta	Non-aligned (transitive)	4	mid	frontal	-1.20954
-0.5	theta	Non-aligned (transitive)	4	mid	central	0.622139
-0.5	theta	Non-aligned (transitive)	4	mid	posterior	-2.06113
-0.5	theta	Non-aligned (transitive)	4	right	frontal	0.56724
-0.5	theta	Non-aligned (transitive)	4	right	central	-0.659374
-0.5	theta	Non-aligned (transitive)	4	right	posterior	0.108521
-0.5	theta	Non-aligned (transitive)	41	left	frontal	-1.20536
-0.5	theta	Non-aligned (transitive)	41	left	central	-0.249825
-0.5	theta	Non-aligned (transitive)	41	left	posterior	-0.261642
-0.5	theta	Non-aligned (transitive)	41	mid	frontal	-0.379955
-0.5	theta	Non-aligned (transitive)	41	mid	central	-0.587684
-0.5	theta	Non-aligned (transitive)	41	mid	posterior	-0.245476
-0.5	theta	Non-aligned (transitive)	41	right	frontal	-0.363625
-0.5	theta	Non-aligned (transitive)	41	right	central	0.130019
-0.5	theta	Non-aligned (transitive)	41	right	posterior	0.175489
-0.5	theta	Non-aligned (transitive)	43	left	frontal	-0.757447
-0.5	theta	Non-aligned (transitive)	43	left	central	-0.919432
-0.5	theta	Non-aligned (transitive)	43	left	posterior	-0.514136
-0.5	theta	Non-aligned (transitive)	43	mid	frontal	-0.873447
-0.5	theta	Non-aligned (transitive)	43	mid	central	-0.629013
-0.5	theta	Non-aligned (transitive)	43	mid	posterior	0.131395
-0.5	theta	Non-aligned (transitive)	43	right	frontal	-0.708719
-0.5	theta	Non-aligned (transitive)	43	right	central	-0.376312
-0.5	theta	Non-aligned (transitive)	43	right	posterior	0.0404114
-0.5	theta	Non-aligned (transitive)	45	left	frontal	0.0673458
-0.5	theta	Non-aligned (transitive)	45	left	central	0.0206512
-0.5	theta	Non-aligned (transitive)	45	left	posterior	0.319229
-0.5	theta	Non-aligned (transitive)	45	mid	frontal	-0.404444
-0.5	theta	Non-aligned (transitive)	45	mid	central	-0.668625
-0.5	theta	Non-aligned (transitive)	45	mid	posterior	0.512008
-0.5	theta	Non-aligned (transitive)	45	right	frontal	0.0545044
-0.5	theta	Non-aligned (transitive)	45	right	central	-0.204482
-0.5	theta	Non-aligned (transitive)	45	right	posterior	0.0293155
-0.5	theta	Non-aligned (transitive)	47	left	frontal	-0.939481
-0.5	theta	Non-aligned (transitive)	47	left	central	-0.606148
-0.5	theta	Non-aligned (transitive)	47	left	posterior	-0.451538
-0.5	theta	Non-aligned (transitive)	47	mid	frontal	-0.0892862
-0.5	theta	Non-aligned (transitive)	47	mid	central	-0.747366
-0.5	theta	Non-aligned (transitive)	47	mid	posterior	-0.96169
-0.5	theta	Non-aligned (transitive)	47	right	frontal	0.202772
-0.5	theta	Non-aligned (transitive)	47	right	central	-0.147356
-0.5	theta	Non-aligned (transitive)	47	right	posterior	-0.480197
-0.5	theta	Non-aligned (transitive)	49	left	frontal	-0.575098
-0.5	theta	Non-aligned (transitive)	49	left	central	-0.180757
-0.5	theta	Non-aligned (transitive)	49	left	posterior	-0.269522
-0.5	theta	Non-aligned (transitive)	49	mid	frontal	-0.373373
-0.5	theta	Non-aligned (transitive)	49	mid	central	-0.0897972
-0.5	theta	Non-aligned (transitive)	49	mid	posterior	0.397676
-0.5	theta	Non-aligned (transitive)	49	right	frontal	-0.372035
-0.5	theta	Non-aligned (transitive)	49	right	central	-0.0476875
-0.5	theta	Non-aligned (transitive)	49	right	posterior	0.47873
-0.5	theta	Non-aligned (transitive)	5	left	frontal	0.41037
-0.5	theta	Non-aligned (transitive)	5	left	central	-0.00919955
-0.5	theta	Non-aligned (transitive)	5	left	posterior	-0.860174
-0.5	theta	Non-aligned (transitive)	5	mid	frontal	0.478748
-0.5	theta	Non-aligned (transitive)	5	mid	central	-0.17415
-0.5	theta	Non-aligned (transitive)	5	mid	posterior	-0.522226
-0.5	theta	Non-aligned (transitive)	5	right	frontal	0.309025
-0.5	theta	Non-aligned (transitive)	5	right	central	-0.167447
-0.5	theta	Non-aligned (transitive)	5	right	posterior	-0.277681
-0.5	theta	Non-aligned (transitive)	7	left	frontal	-0.760103
-0.5	theta	Non-aligned (transitive)	7	left	central	-0.546765
-0.5	theta	Non-aligned (transitive)	7	left	posterior	0.27793
-0.5	theta	Non-aligned (transitive)	7	mid	frontal	-0.39962
-0.5	theta	Non-aligned (transitive)	7	mid	central	-0.280994
-0.5	theta	Non-aligned (transitive)	7	mid	posterior	0.0638917
-0.5	theta	Non-aligned (transitive)	7	right	frontal	-0.251522
-0.5	theta	Non-aligned (transitive)	7	right	central	0.101701
-0.5	theta	Non-aligned (transitive)	7	right	posterior	-0.100629
-0.5	theta	Non-aligned (transitive)	8	left	frontal	-0.126128
-0.5	theta	Non-aligned (transitive)	8	left	central	-0.355992
-0.5	theta	Non-aligned (transitive)	8	left	posterior	-0.0769173
-0.5	theta	Non-aligned (transitive)	8	mid	frontal	-1.19088
-0.5	theta	Non-aligned (transitive)	8	mid	central	0.0119062
-0.5	theta	Non-aligned (transitive)	8	mid	posterior	-0.331078
-0.5	theta	Non-aligned (transitive)	8	right	frontal	-1.22933
-0.5	theta	Non-aligned (transitive)	8	right	central	-0.19768
-0.5	theta	Non-aligned (transitive)	8	right	posterior	0.153841
-0.5	theta	Non-aligned (transitive)	9	left	frontal	-0.890873
-0.5	theta	Non-aligned (transitive)	9	left	central	-0.427863
-0.5	theta	Non-aligned (transitive)	9	left	posterior	-0.311382
-0.5	theta	Non-aligned (transitive)	9	mid	frontal	-0.365244
-0.5	theta	Non-aligned (transitive)	9	mid	central	-0.90293
-0.5	theta	Non-aligned (transitive)	9	mid	posterior	-0.516583
-0.5	theta	Non-aligned (transitive)	9	right	frontal	-0.558866
-0.5	theta	Non-aligned (transitive)	9	right	central	-0.969538
-0.5	theta	Non-aligned (transitive)	9	right	posterior	-0.502346
-0.5	theta	Aligned (intransitive)	10	left	frontal	-0.348596
-0.5	theta	Aligned (intransitive)	10	left	central	-1.57878
-0.5	theta	Aligned (intransitive)	10	left	posterior	-1.08414
-0.5	theta	Aligned (intransitive)	10	mid	frontal	-0.136447
-0.5	theta	Aligned (intransitive)	10	mid	central	-1.36772
-0.5	theta	Aligned (intransitive)	10	mid	posterior	-1.39335
-0.5	theta	Aligned (intransitive)	10	right	frontal	-0.380352
-0.5	theta	Aligned (intransitive)	10	right	central	-0.934201
-0.5	theta	Aligned (intransitive)	10	right	posterior	-0.18748
-0.5	theta	Aligned (intransitive)	12	left	frontal	-0.348244
-0.5	theta	Aligned (intransitive)	12	left	central	-0.221211
-0.5	theta	Aligned (intransitive)	12	left	posterior	0.0491728
-0.5	theta	Aligned (intransitive)	12	mid	frontal	-0.303483
-0.5	theta	Aligned (intransitive)	12	mid	central	-0.255444
-0.5	theta	Aligned (intransitive)	12	mid	posterior	-0.191518
-0.5	theta	Aligned (intransitive)	12	right	frontal	-0.0390781
-0.5	theta	Aligned (intransitive)	12	right	central	-0.103413
-0.5	theta	Aligned (intransitive)	12	right	posterior	-0.375827
-0.5	theta	Aligned (intransitive)	14	left	frontal	0.390806
-0.5	theta	Aligned (intransitive)	14	left	central	0.350154
-0.5	theta	Aligned (intransitive)	14	left	posterior	0.121861
-0.5	theta	Aligned (intransitive)	14	mid	frontal	0.40884
-0.5	theta	Aligned (intransitive)	14	mid	central	0.449599
-0.5	theta	Aligned (intransitive)	14	mid	posterior	-0.0334605
-0.5	theta	Aligned (intransitive)	14	right	frontal	0.607712
-0.5	theta	Aligned (intransitive)	14	right	central	0.697682
-0.5	theta	Aligned (intransitive)	14	right	posterior	0.336069
-0.5	theta	Aligned (intransitive)	16	left	frontal	-1.11397
-0.5	theta	Aligned (intransitive)	16	left	central	-0.975037
-0.5	theta	Aligned (intransitive)	16	left	posterior	-0.781017
-0.5	theta	Aligned (intransitive)	16	mid	frontal	-0.836817
-0.5	theta	Aligned (intransitive)	16	mid	central	-0.605661
-0.5	theta	Aligned (intransitive)	16	mid	posterior	-1.30711
-0.5	theta	Aligned (intransitive)	16	right	frontal	-1.09095
-0.5	theta	Aligned (intransitive)	16	right	central	-1.04347
-0.5	theta	Aligned (intransitive)	16	right	posterior	-1.5684
-0.5	theta	Aligned (intransitive)	18	left	frontal	0.265026
-0.5	theta	Aligned (intransitive)	18	left	central	0.174361
-0.5	theta	Aligned (intransitive)	18	left	posterior	-0.120759
-0.5	theta	Aligned (intransitive)	18	mid	frontal	-0.155596
-0.5	theta	Aligned (intransitive)	18	mid	central	-0.0318953
-0.5	theta	Aligned (intransitive)	18	mid	posterior	0.260488
-0.5	theta	Aligned (intransitive)	18	right	frontal	-0.238817
-0.5	theta	Aligned (intransitive)	18	right	central	-0.127447
-0.5	theta	Aligned (intransitive)	18	right	posterior	0.127607
-0.5	theta	Aligned (intransitive)	2	left	frontal	-0.174613
-0.5	theta	Aligned (intransitive)	2	left	central	0.123234
-0.5	theta	Aligned (intransitive)	2	left	posterior	0.179833
-0.5	theta	Aligned (intransitive)	2	mid	frontal	-0.0262869
-0.5	theta	Aligned (intransitive)	2	mid	central	-0.421175
-0.5	theta	Aligned (intransitive)	2	mid	posterior	-0.0727057
-0.5	theta	Aligned (intransitive)	2	right	frontal	-0.182035
-0.5	theta	Aligned (intransitive)	2	right	central	-0.208787
-0.5	theta	Aligned (intransitive)	2	right	posterior	-0.00512172
-0.5	theta	Aligned (intransitive)	20	left	frontal	0.325571
-0.5	theta	Aligned (intransitive)	20	left	central	0.255081
-0.5	theta	Aligned (intransitive)	20	left	posterior	-0.695393
-0.5	theta	Aligned (intransitive)	20	mid	frontal	-0.153528
-0.5	theta	Aligned (intransitive)	20	mid	central	0.0718575
-0.5	theta	Aligned (intransitive)	20	mid	posterior	-0.684381
-0.5	theta	Aligned (intransitive)	20	right	frontal	-0.143007
-0.5	theta	Aligned (intransitive)	20	right	central	0.419945
-0.5	theta	Aligned (intransitive)	20	right	posterior	0.421948
-0.5	theta	Aligned (intransitive)	22	left	frontal	-0.190171
-0.5	theta	Aligned (intransitive)	22	left	central	0.40571
-0.5	theta	Aligned (intransitive)	22	left	posterior	0.135449
-0.5	theta	Aligned (intransitive)	22	mid	frontal	-0.356296
-0.5	theta	Aligned (intransitive)	22	mid	central	-0.106238
-0.5	theta	Aligned (intransitive)	22	mid	posterior	0.187733
-0.5	theta	Aligned (intransitive)	22	right	frontal	-0.678019
-0.5	theta	Aligned (intransitive)	22	right	central	-0.49518
-0.5	theta	Aligned (intransitive)	22	right	posterior	-0.192103
-0.5	theta	Aligned (intransitive)	24	left	frontal	0.112351
-0.5	theta	Aligned (intransitive)	24	left	central	0.268234
-0.5	theta	Aligned (intransitive)	24	left	posterior	0.443153
-0.5	theta	Aligned (intransitive)	24	mid	frontal	-0.398413
-0.5	theta	Aligned (intransitive)	24	mid	central	0.106044
-0.5	theta	Aligned (intransitive)	24	mid	posterior	0.457083
-0.5	theta	Aligned (intransitive)	24	right	frontal	-0.646073
-0.5	theta	Aligned (intransitive)	24	right	central	-0.179475
-0.5	theta	Aligned (intransitive)	24	right	posterior	-0.187425
-0.5	theta	Aligned (intransitive)	26	left	frontal	0.220938
-0.5	theta	Aligned (intransitive)	26	left	central	0.217265
-0.5	theta	Aligned (intransitive)	26	left	posterior	-0.0686859
-0.5	theta	Aligned (intransitive)	26	mid	frontal	0.487433
-0.5	theta	Aligned (intransitive)	26	mid	central	0.381903
-0.5	theta	Aligned (intransitive)	26	mid	posterior	0.122249
-0.5	theta	Aligned (intransitive)	26	right	frontal	0.414164
-0.5	theta	Aligned (intransitive)	26	right	central	0.563811
-0.5	theta	Aligned (intransitive)	26	right	posterior	0.211929
-0.5	theta	Aligned (intransitive)	28	left	frontal	-0.521083
-0.5	theta	Aligned (intransitive)	28	left	central	-0.239322
-0.5	theta	Aligned (intransitive)	28	left	posterior	-0.187797
-0.5	theta	Aligned (intransitive)	28	mid	frontal	-0.5949
-0.5	theta	Aligned (intransitive)	28	mid	central	-0.519522
-0.5	theta	Aligned (intransitive)	28	mid	posterior	-0.316705
-0.5	theta	Aligned (intransitive)	28	right	frontal	-0.431424
-0.5	theta	Aligned (intransitive)	28	right	central	-0.131149
-0.5	theta	Aligned (intransitive)	28	right	posterior	0.136832
-0.5	theta	Aligned (intransitive)	30	left	frontal	-0.111696
-0.5	theta	Aligned (intransitive)	30	left	central	0.238923
-0.5	theta	Aligned (intransitive)	30	left	posterior	0.0679774
-0.5	theta	Aligned (intransitive)	30	mid	frontal	-0.638318
-0.5	theta	Aligned (intransitive)	30	mid	central	-0.411784
-0.5	theta	Aligned (intransitive)	30	mid	posterior	-0.434884
-0.5	theta	Aligned (intransitive)	30	right	frontal	-0.531335
-0.5	theta	Aligned (intransitive)	30	right	central	-0.353898
-0.5	theta	Aligned (intransitive)	30	right	posterior	-0.298841
-0.5	theta	Aligned (intransitive)	32	left	frontal	0.0720285
-0.5	theta	Aligned (intransitive)	32	left	central	-0.0830722
-0.5	theta	Aligned (intransitive)	32	left	posterior	-0.118279
-0.5	theta	Aligned (intransitive)	32	mid	frontal	-0.23286
-0.5	theta	Aligned (intransitive)	32	mid	central	-0.530706
-0.5	theta	Aligned (intransitive)	32	mid	posterior	0.352209
-0.5	theta	Aligned (intransitive)	32	right	frontal	-0.137813
-0.5	theta	Aligned (intransitive)	32	right	central	0.106533
-0.5	theta	Aligned (intransitive)	32	right	posterior	0.19623
-0.5	theta	Aligned (intransitive)	34	left	frontal	-1.25015
-0.5	theta	Aligned (intransitive)	34	left	central	-0.511218
-0.5	theta	Aligned (intransitive)	34	left	posterior	0.774674
-0.5	theta	Aligned (intransitive)	34	mid	frontal	-1.52538
-0.5	theta	Aligned (intransitive)	34	mid	central	-1.03754
-0.5	theta	Aligned (intransitive)	34	mid	posterior	0.222616
-0.5	theta	Aligned (intransitive)	34	right	frontal	-1.03916
-0.5	theta	Aligned (intransitive)	34	right	central	-1.02363
-0.5	theta	Aligned (intransitive)	34	right	posterior	-0.305257
-0.5	theta	Aligned (intransitive)	36	left	frontal	0.0040911
-0.5	theta	Aligned (intransitive)	36	left	central	0.108437
-0.5	theta	Aligned (intransitive)	36	left	posterior	0.0366072
-0.5	theta	Aligned (intransitive)	36	mid	frontal	-0.232952
-0.5	theta	Aligned (intransitive)	36	mid	central	0.0766789
-0.5	theta	Aligned (intransitive)	36	mid	posterior	-0.233843
-0.5	theta	Aligned (intransitive)	36	right	frontal	-0.128051
-0.5	theta	Aligned (intransitive)	36	right	central	-0.684346
-0.5	theta	Aligned (intransitive)	36	right	posterior	-0.724768
-0.5	theta	Aligned (intransitive)	38	left	frontal	0.10227
-0.5	theta	Aligned (intransitive)	38	left	central	0.0489335
-0.5	theta	Aligned (intransitive)	38	left	posterior	0.25197
-0.5	theta	Aligned (intransitive)	38	mid	frontal	-0.143022
-0.5	theta	Aligned (intransitive)	38	mid	central	-0.417673
-0.5	theta	Aligned (intransitive)	38	mid	posterior	0.139869
-0.5	theta	Aligned (intransitive)	38	right	frontal	0.0842907
-0.5	theta	Aligned (intransitive)	38	right	central	0.0168577
-0.5	theta	Aligned (intransitive)	38	right	posterior	-0.209894
-0.5	theta	Aligned (intransitive)	4	left	frontal	0.38591
-0.5	theta	Aligned (intransitive)	4	left	central	0.574071
-0.5	theta	Aligned (intransitive)	4	left	posterior	0.672333
-0.5	theta	Aligned (intransitive)	4	mid	frontal	-0.266553
-0.5	theta	Aligned (intransitive)	4	mid	central	0.0808088
-0.5	theta	Aligned (intransitive)	4	mid	posterior	0.370275
-0.5	theta	Aligned (intransitive)	4	right	frontal	-0.0555545
-0.5	theta	Aligned (intransitive)	4	right	central	0.0174699
-0.5	theta	Aligned (intransitive)	4	right	posterior	0.346581
-0.5	theta	Aligned (intransitive)	40	left	frontal	0.247889
-0.5	theta	Aligned (intransitive)	40	left	central	0.164629
-0.5	theta	Aligned (intransitive)	40	left	posterior	0.0539873
-0.5	theta	Aligned (intransitive)	40	mid	frontal	0.473346
-0.5	theta	Aligned (intransitive)	40	mid	central	0.285159
-0.5	theta	Aligned (intransitive)	40	mid	posterior	-0.136921
-0.5	theta	Aligned (intransitive)	40	right	frontal	0.385286
-0.5	theta	Aligned (intransitive)	40	right	central	0.339394
-0.5	theta	Aligned (intransitive)	40	right	posterior	-0.347483
-0.5	theta	Aligned (intransitive)	42	left	frontal	-0.404164
-0.5	theta	Aligned (intransitive)	42	left	central	-0.215736
-0.5	theta	Aligned (intransitive)	42	left	posterior	-0.286438
-0.5	theta	Aligned (intransitive)	42	mid	frontal	-0.791449
-0.5	theta	Aligned (intransitive)	42	mid	central	-0.13394
-0.5	theta	Aligned (intransitive)	42	mid	posterior	-0.48741
-0.5	theta	Aligned (intransitive)	42	right	frontal	-0.370194
-0.5	theta	Aligned (intransitive)	42	right	central	-0.0916268
-0.5	theta	Aligned (intransitive)	42	right	posterior	-0.0209436
-0.5	theta	Aligned (intransitive)	44	left	frontal	-0.249486
-0.5	theta	Aligned (intransitive)	44	left	central	-0.382115
-0.5	theta	Aligned (intransitive)	44	left	posterior	-0.182327
-0.5	theta	Aligned (intransitive)	44	mid	frontal	-0.112395
-0.5	theta	Aligned (intransitive)	44	mid	central	-0.267496
-0.5	theta	Aligned (intransitive)	44	mid	posterior	0.108512
-0.5	theta	Aligned (intransitive)	44	right	frontal	-0.0772036
-0.5	theta	Aligned (intransitive)	44	right	central	0.0350869
-0.5	theta	Aligned (intransitive)	44	right	posterior	-0.0996735
-0.5	theta	Aligned (intransitive)	46	left	frontal	0.15287
-0.5	theta	Aligned (intransitive)	46	left	central	0.0533183
-0.5	theta	Aligned (intransitive)	46	left	posterior	-0.126282
-0.5	theta	Aligned (intransitive)	46	mid	frontal	-0.122119
-0.5	theta	Aligned (intransitive)	46	mid	central	0.110508
-0.5	theta	Aligned (intransitive)	46	mid	posterior	-0.0784961
-0.5	theta	Aligned (intransitive)	46	right	frontal	-0.080457
-0.5	theta	Aligned (intransitive)	46	right	central	-0.189364
-0.5	theta	Aligned (intransitive)	46	right	posterior	-0.232995
-0.5	theta	Aligned (intransitive)	48	left	frontal	-0.360763
-0.5	theta	Aligned (intransitive)	48	left	central	0.167039
-0.5	theta	Aligned (intransitive)	48	left	posterior	0.109494
-0.5	theta	Aligned (intransitive)	48	mid	frontal	-0.569368
-0.5	theta	Aligned (intransitive)	48	mid	central	-0.0392347
-0.5	theta	Aligned (intransitive)	48	mid	posterior	-0.0860168
-0.5	theta	Aligned (intransitive)	48	right	frontal	-0.207648
-0.5	theta	Aligned (intransitive)	48	right	central	-0.0033646
-0.5	theta	Aligned (intransitive)	48	right	posterior	-0.104145
-0.5	theta	Aligned (intransitive)	50	left	frontal	-0.214558
-0.5	theta	Aligned (intransitive)	50	left	central	-0.237575
-0.5	theta	Aligned (intransitive)	50	left	posterior	-0.0944298
-0.5	theta	Aligned (intransitive)	50	mid	frontal	-0.188737
-0.5	theta	Aligned (intransitive)	50	mid	central	-0.685711
-0.5	theta	Aligned (intransitive)	50	mid	posterior	-0.277728
-0.5	theta	Aligned (intransitive)	50	right	frontal	-0.514291
-0.5	theta	Aligned (intransitive)	50	right	central	-0.119445
-0.5	theta	Aligned (intransitive)	50	right	posterior	-0.139832
-0.5	theta	Aligned (intransitive)	6	left	frontal	0.0428801
-0.5	theta	Aligned (intransitive)	6	left	central	-0.0163124
-0.5	theta	Aligned (intransitive)	6	left	posterior	0.188642
-0.5	theta	Aligned (intransitive)	6	mid	frontal	-0.292509
-0.5	theta	Aligned (intransitive)	6	mid	central	0.209911
-0.5	theta	Aligned (intransitive)	6	mid	posterior	0.476203
-0.5	theta	Aligned (intransitive)	6	right	frontal	-0.0518747
-0.5	theta	Aligned (intransitive)	6	right	central	0.25171
-0.5	theta	Aligned (intransitive)	6	right	posterior	0.0680227
-0.5	theta	Aligned (intransitive)	8	left	frontal	-0.216175
-0.5	theta	Aligned (intransitive)	8	left	central	-0.118814
-0.5	theta	Aligned (intransitive)	8	left	posterior	-0.488485
-0.5	theta	Aligned (intransitive)	8	mid	frontal	-0.22311
-0.5	theta	Aligned (intransitive)	8	mid	central	-0.142868
-0.5	theta	Aligned (intransitive)	8	mid	posterior	0.05128
-0.5	theta	Aligned (intransitive)	8	right	frontal	-0.296426
-0.5	theta	Aligned (intransitive)	8	right	central	-0.210971
-0.5	theta	Aligned (intransitive)	8	right	posterior	-0.09577
-0.5	theta	Non-aligned (intransitive)	1	left	frontal	0.0419335
-0.5	theta	Non-aligned (intransitive)	1	left	central	0.508405
-0.5	theta	Non-aligned (intransitive)	1	left	posterior	0.358073
-0.5	theta	Non-aligned (intransitive)	1	mid	frontal	-0.0295232
-0.5	theta	Non-aligned (intransitive)	1	mid	central	-0.0393791
-0.5	theta	Non-aligned (intransitive)	1	mid	posterior	0.382205
-0.5	theta	Non-aligned (intransitive)	1	right	frontal	-0.301737
-0.5	theta	Non-aligned (intransitive)	1	right	central	-0.390034
-0.5	theta	Non-aligned (intransitive)	1	right	posterior	-0.361655
-0.5	theta	Non-aligned (intransitive)	11	left	frontal	-0.492857
-0.5	theta	Non-aligned (intransitive)	11	left	central	-0.343273
-0.5	theta	Non-aligned (intransitive)	11	left	posterior	0.20347
-0.5	theta	Non-aligned (intransitive)	11	mid	frontal	-1.11567
-0.5	theta	Non-aligned (intransitive)	11	mid	central	-0.584649
-0.5	theta	Non-aligned (intransitive)	11	mid	posterior	-0.21814
-0.5	theta	Non-aligned (intransitive)	11	right	frontal	-1.04008
-0.5	theta	Non-aligned (intransitive)	11	right	central	-0.580944
-0.5	theta	Non-aligned (intransitive)	11	right	posterior	-0.115083
-0.5	theta	Non-aligned (intransitive)	13	left	frontal	0.330605
-0.5	theta	Non-aligned (intransitive)	13	left	central	1.01887
-0.5	theta	Non-aligned (intransitive)	13	left	posterior	0.627299
-0.5	theta	Non-aligned (intransitive)	13	mid	frontal	0.414035
-0.5	theta	Non-aligned (intransitive)	13	mid	central	0.696544
-0.5	theta	Non-aligned (intransitive)	13	mid	posterior	0.48265
-0.5	theta	Non-aligned (intransitive)	13	right	frontal	0.428062
-0.5	theta	Non-aligned (intransitive)	13	right	central	0.36206
-0.5	theta	Non-aligned (intransitive)	13	right	posterior	0.491788
-0.5	theta	Non-aligned (intransitive)	15	left	frontal	0.184015
-0.5	theta	Non-aligned (intransitive)	15	left	central	0.388461
-0.5	theta	Non-aligned (intransitive)	15	left	posterior	0.038663
-0.5	theta	Non-aligned (intransitive)	15	mid	frontal	-0.212013
-0.5	theta	Non-aligned (intransitive)	15	mid	central	0.403562
-0.5	theta	Non-aligned (intransitive)	15	mid	posterior	-0.102564
-0.5	theta	Non-aligned (intransitive)	15	right	frontal	0.0521811
-0.5	theta	Non-aligned (intransitive)	15	right	central	0.171146
-0.5	theta	Non-aligned (intransitive)	15	right	posterior	-0.29696
-0.5	theta	Non-aligned (intransitive)	17	left	frontal	-0.201654
-0.5	theta	Non-aligned (intransitive)	17	left	central	-0.450436
-0.5	theta	Non-aligned (intransitive)	17	left	posterior	-0.290802
-0.5	theta	Non-aligned (intransitive)	17	mid	frontal	-0.541978
-0.5	theta	Non-aligned (intransitive)	17	mid	central	-0.537805
-0.5	theta	Non-aligned (intransitive)	17	mid	posterior	-1.09426
-0.5	theta	Non-aligned (intransitive)	17	right	frontal	-0.416812
-0.5	theta	Non-aligned (intransitive)	17	right	central	-0.541031
-0.5	theta	Non-aligned (intransitive)	17	right	posterior	-0.521823
-0.5	theta	Non-aligned (intransitive)	19	left	frontal	0.0856867
-0.5	theta	Non-aligned (intransitive)	19	left	central	0.136354
-0.5	theta	Non-aligned (intransitive)	19	left	posterior	0.0825196
-0.5	theta	Non-aligned (intransitive)	19	mid	frontal	0.0560944
-0.5	theta	Non-aligned (intransitive)	19	mid	central	0.0975483
-0.5	theta	Non-aligned (intransitive)	19	mid	posterior	0.147721
-0.5	theta	Non-aligned (intransitive)	19	right	frontal	0.149264
-0.5	theta	Non-aligned (intransitive)	19	right	central	0.133257
-0.5	theta	Non-aligned (intransitive)	19	right	posterior	0.160769
-0.5	theta	Non-aligned (intransitive)	21	left	frontal	-0.561853
-0.5	theta	Non-aligned (intransitive)	21	left	central	-0.197345
-0.5	theta	Non-aligned (intransitive)	21	left	posterior	-0.0639037
-0.5	theta	Non-aligned (intransitive)	21	mid	frontal	-0.191873
-0.5	theta	Non-aligned (intransitive)	21	mid	central	0.359294
-0.5	theta	Non-aligned (intransitive)	21	mid	posterior	-0.0034527
-0.5	theta	Non-aligned (intransitive)	21	right	frontal	0.285567
-0.5	theta	Non-aligned (intransitive)	21	right	central	0.626894
-0.5	theta	Non-aligned (intransitive)	21	right	posterior	0.191259
-0.5	theta	Non-aligned (intransitive)	23	left	frontal	0.397777
-0.5	theta	Non-aligned (intransitive)	23	left	central	0.368242
-0.5	theta	Non-aligned (intransitive)	23	left	posterior	0.237845
-0.5	theta	Non-aligned (intransitive)	23	mid	frontal	0.382347
-0.5	theta	Non-aligned (intransitive)	23	mid	central	0.616334
-0.5	theta	Non-aligned (intransitive)	23	mid	posterior	-0.390359
-0.5	theta	Non-aligned (intransitive)	23	right	frontal	0.0666619
-0.5	theta	Non-aligned (intransitive)	23	right	central	0.116905
-0.5	theta	Non-aligned (intransitive)	23	right	posterior	-0.351129
-0.5	theta	Non-aligned (intransitive)	24	left	frontal	-1.02138
-0.5	theta	Non-aligned (intransitive)	24	left	central	-1.43261
-0.5	theta	Non-aligned (intransitive)	24	left	posterior	1.19421
-0.5	theta	Non-aligned (intransitive)	24	mid	frontal	-3.55921
-0.5	theta	Non-aligned (intransitive)	24	mid	central	-2.58929
-0.5	theta	Non-aligned (intransitive)	24	mid	posterior	0.763481
-0.5	theta	Non-aligned (intransitive)	24	right	frontal	-1.44684
-0.5	theta	Non-aligned (intransitive)	24	right	central	0.178533
-0.5	theta	Non-aligned (intransitive)	24	right	posterior	-0.823225
-0.5	theta	Non-aligned (intransitive)	25	left	frontal	0.269728
-0.5	theta	Non-aligned (intransitive)	25	left	central	-0.181166
-0.5	theta	Non-aligned (intransitive)	25	left	posterior	-0.504118
-0.5	theta	Non-aligned (intransitive)	25	mid	frontal	-0.208089
-0.5	theta	Non-aligned (intransitive)	25	mid	central	-0.273186
-0.5	theta	Non-aligned (intransitive)	25	mid	posterior	-0.130563
-0.5	theta	Non-aligned (intransitive)	25	right	frontal	-0.226933
-0.5	theta	Non-aligned (intransitive)	25	right	central	0.340239
-0.5	theta	Non-aligned (intransitive)	25	right	posterior	-0.272233
-0.5	theta	Non-aligned (intransitive)	27	left	frontal	0.322362
-0.5	theta	Non-aligned (intransitive)	27	left	central	0.424803
-0.5	theta	Non-aligned (intransitive)	27	left	posterior	0.872068
-0.5	theta	Non-aligned (intransitive)	27	mid	frontal	-0.0196589
-0.5	theta	Non-aligned (intransitive)	27	mid	central	0.233185
-0.5	theta	Non-aligned (intransitive)	27	mid	posterior	0.920542
-0.5	theta	Non-aligned (intransitive)	27	right	frontal	-0.0129776
-0.5	theta	Non-aligned (intransitive)	27	right	central	0.731757
-0.5	theta	Non-aligned (intransitive)	27	right	posterior	1.10634
-0.5	theta	Non-aligned (intransitive)	29	left	frontal	0.223529
-0.5	theta	Non-aligned (intransitive)	29	left	central	0.0114305
-0.5	theta	Non-aligned (intransitive)	29	left	posterior	-0.000938166
-0.5	theta	Non-aligned (intransitive)	29	mid	frontal	0.67509
-0.5	theta	Non-aligned (intransitive)	29	mid	central	0.517029
-0.5	theta	Non-aligned (intransitive)	29	mid	posterior	0.205357
-0.5	theta	Non-aligned (intransitive)	29	right	frontal	0.534931
-0.5	theta	Non-aligned (intransitive)	29	right	central	0.648634
-0.5	theta	Non-aligned (intransitive)	29	right	posterior	0.481735
-0.5	theta	Non-aligned (intransitive)	3	left	frontal	-0.822537
-0.5	theta	Non-aligned (intransitive)	3	left	central	-0.391229
-0.5	theta	Non-aligned (intransitive)	3	left	posterior	0.225151
-0.5	theta	Non-aligned (intransitive)	3	mid	frontal	-0.786834
-0.5	theta	Non-aligned (intransitive)	3	mid	central	-0.548022
-0.5	theta	Non-aligned (intransitive)	3	mid	posterior	-0.32257
-0.5	theta	Non-aligned (intransitive)	3	right	frontal	-0.398519
-0.5	theta	Non-aligned (intransitive)	3	right	central	-0.419397
-0.5	theta	Non-aligned (intransitive)	3	right	posterior	-0.153619
-0.5	theta	Non-aligned (intransitive)	31	left	frontal	0.00545329
-0.5	theta	Non-aligned (intransitive)	31	left	central	-0.360532
-0.5	theta	Non-aligned (intransitive)	31	left	posterior	0.0823061
-0.5	theta	Non-aligned (intransitive)	31	mid	frontal	0.826816
-0.5	theta	Non-aligned (intransitive)	31	mid	central	0.413504
-0.5	theta	Non-aligned (intransitive)	31	mid	posterior	0.665798
-0.5	theta	Non-aligned (intransitive)	31	right	frontal	1.19871
-0.5	theta	Non-aligned (intransitive)	31	right	central	0.716462
-0.5	theta	Non-aligned (intransitive)	31	right	posterior	0.163261
-0.5	theta	Non-aligned (intransitive)	32	left	frontal	-4.57911
-0.5	theta	Non-aligned (intransitive)	32	left	central	-6.29095
-0.5	theta	Non-aligned (intransitive)	32	left	posterior	-4.56154
-0.5	theta	Non-aligned (intransitive)	32	mid	frontal	-4.78862
-0.5	theta	Non-aligned (intransitive)	32	mid	central	-7.16245
-0.5	theta	Non-aligned (intransitive)	32	mid	posterior	-3.46775
-0.5	theta	Non-aligned (intransitive)	32	right	frontal	-4.1536
-0.5	theta	Non-aligned (intransitive)	32	right	central	-8.54516
-0.5	theta	Non-aligned (intransitive)	32	right	posterior	-1.89088
-0.5	theta	Non-aligned (intransitive)	33	left	frontal	-0.712413
-0.5	theta	Non-aligned (intransitive)	33	left	central	-0.31287
-0.5	theta	Non-aligned (intransitive)	33	left	posterior	0.00618058
-0.5	theta	Non-aligned (intransitive)	33	mid	frontal	-0.136199
-0.5	theta	Non-aligned (intransitive)	33	mid	central	-0.651076
-0.5	theta	Non-aligned (intransitive)	33	mid	posterior	-0.137661
-0.5	theta	Non-aligned (intransitive)	33	right	frontal	-0.258923
-0.5	theta	Non-aligned (intransitive)	33	right	central	-0.40717
-0.5	theta	Non-aligned (intransitive)	33	right	posterior	-0.220215
-0.5	theta	Non-aligned (intransitive)	35	left	frontal	0.289791
-0.5	theta	Non-aligned (intransitive)	35	left	central	-0.0554162
-0.5	theta	Non-aligned (intransitive)	35	left	posterior	-0.518837
-0.5	theta	Non-aligned (intransitive)	35	mid	frontal	0.00177778
-0.5	theta	Non-aligned (intransitive)	35	mid	central	-0.232748
-0.5	theta	Non-aligned (intransitive)	35	mid	posterior	-0.726076
-0.5	theta	Non-aligned (intransitive)	35	right	frontal	-0.257917
-0.5	theta	Non-aligned (intransitive)	35	right	central	-0.49365
-0.5	theta	Non-aligned (intransitive)	35	right	posterior	-0.341236
-0.5	theta	Non-aligned (intransitive)	37	left	frontal	0.102716
-0.5	theta	Non-aligned (intransitive)	37	left	central	0.242664
-0.5	theta	Non-aligned (intransitive)	37	left	posterior	0.360163
-0.5	theta	Non-aligned (intransitive)	37	mid	frontal	0.204991
-0.5	theta	Non-aligned (intransitive)	37	mid	central	0.153823
-0.5	theta	Non-aligned (intransitive)	37	mid	posterior	0.254251
-0.5	theta	Non-aligned (intransitive)	37	right	frontal	-0.12236
-0.5	theta	Non-aligned (intransitive)	37	right	central	-0.0411411
-0.5	theta	Non-aligned (intransitive)	37	right	posterior	-0.152078
-0.5	theta	Non-aligned (intransitive)	39	left	frontal	-0.283265
-0.5	theta	Non-aligned (intransitive)	39	left	central	0.147119
-0.5	theta	Non-aligned (intransitive)	39	left	posterior	0.334419
-0.5	theta	Non-aligned (intransitive)	39	mid	frontal	-0.554122
-0.5	theta	Non-aligned (intransitive)	39	mid	central	-0.207065
-0.5	theta	Non-aligned (intransitive)	39	mid	posterior	0.374937
-0.5	theta	Non-aligned (intransitive)	39	right	frontal	-0.363659
-0.5	theta	Non-aligned (intransitive)	39	right	central	-0.175317
-0.5	theta	Non-aligned (intransitive)	39	right	posterior	-0.0157951
-0.5	theta	Non-aligned (intransitive)	41	left	frontal	0.198621
-0.5	theta	Non-aligned (intransitive)	41	left	central	0.28508
-0.5	theta	Non-aligned (intransitive)	41	left	posterior	-0.136078
-0.5	theta	Non-aligned (intransitive)	41	mid	frontal	0.333907
-0.5	theta	Non-aligned (intransitive)	41	mid	central	0.490733
-0.5	theta	Non-aligned (intransitive)	41	mid	posterior	0.0399909
-0.5	theta	Non-aligned (intransitive)	41	right	frontal	0.575021
-0.5	theta	Non-aligned (intransitive)	41	right	central	0.316067
-0.5	theta	Non-aligned (intransitive)	41	right	posterior	0.432391
-0.5	theta	Non-aligned (intransitive)	43	left	frontal	0.157414
-0.5	theta	Non-aligned (intransitive)	43	left	central	0.249187
-0.5	theta	Non-aligned (intransitive)	43	left	posterior	0.0861296
-0.5	theta	Non-aligned (intransitive)	43	mid	frontal	-0.331532
-0.5	theta	Non-aligned (intransitive)	43	mid	central	-0.183902
-0.5	theta	Non-aligned (intransitive)	43	mid	posterior	-0.263946
-0.5	theta	Non-aligned (intransitive)	43	right	frontal	-0.212391
-0.5	theta	Non-aligned (intransitive)	43	right	central	0.128665
-0.5	theta	Non-aligned (intransitive)	43	right	posterior	-0.169648
-0.5	theta	Non-aligned (intransitive)	45	left	frontal	-0.130278
-0.5	theta	Non-aligned (intransitive)	45	left	central	-0.0195769
-0.5	theta	Non-aligned (intransitive)	45	left	posterior	0.239592
-0.5	theta	Non-aligned (intransitive)	45	mid	frontal	-0.34572
-0.5	theta	Non-aligned (intransitive)	45	mid	central	0.34772
-0.5	theta	Non-aligned (intransitive)	45	mid	posterior	0.567153
-0.5	theta	Non-aligned (intransitive)	45	right	frontal	-0.00581972
-0.5	theta	Non-aligned (intransitive)	45	right	central	0.364283
-0.5	theta	Non-aligned (intransitive)	45	right	posterior	0.48089
-0.5	theta	Non-aligned (intransitive)	47	left	frontal	-0.369053
-0.5	theta	Non-aligned (intransitive)	47	left	central	0.0262829
-0.5	theta	Non-aligned (intransitive)	47	left	posterior	0.596229
-0.5	theta	Non-aligned (intransitive)	47	mid	frontal	-0.888114
-0.5	theta	Non-aligned (intransitive)	47	mid	central	-0.277906
-0.5	theta	Non-aligned (intransitive)	47	mid	posterior	0.239994
-0.5	theta	Non-aligned (intransitive)	47	right	frontal	-0.53489
-0.5	theta	Non-aligned (intransitive)	47	right	central	0.384867
-0.5	theta	Non-aligned (intransitive)	47	right	posterior	0.526113
-0.5	theta	Non-aligned (intransitive)	49	left	frontal	-0.064204
-0.5	theta	Non-aligned (intransitive)	49	left	central	-0.324208
-0.5	theta	Non-aligned (intransitive)	49	left	posterior	-0.194339
-0.5	theta	Non-aligned (intransitive)	49	mid	frontal	-0.0122704
-0.5	theta	Non-aligned (intransitive)	49	mid	central	-0.0979186
-0.5	theta	Non-aligned (intransitive)	49	mid	posterior	-0.264128
-0.5	theta	Non-aligned (intransitive)	49	right	frontal	0.15446
-0.5	theta	Non-aligned (intransitive)	49	right	central	0.237455
-0.5	theta	Non-aligned (intransitive)	49	right	posterior	0.167405
-0.5	theta	Non-aligned (intransitive)	5	left	frontal	0.218628
-0.5	theta	Non-aligned (intransitive)	5	left	central	0.399053
-0.5	theta	Non-aligned (intransitive)	5	left	posterior	0.375683
-0.5	theta	Non-aligned (intransitive)	5	mid	frontal	-0.435522
-0.5	theta	Non-aligned (intransitive)	5	mid	central	0.0658639
-0.5	theta	Non-aligned (intransitive)	5	mid	posterior	0.351454
-0.5	theta	Non-aligned (intransitive)	5	right	frontal	-0.0671459
-0.5	theta	Non-aligned (intransitive)	5	right	central	0.306056
-0.5	theta	Non-aligned (intransitive)	5	right	posterior	0.367875
-0.5	theta	Non-aligned (intransitive)	50	left	frontal	6.44478
-0.5	theta	Non-aligned (intransitive)	50	left	central	2.45774
-0.5	theta	Non-aligned (intransitive)	50	left	posterior	2.54986
-0.5	theta	Non-aligned (intransitive)	50	mid	frontal	3.00876
-0.5	theta	Non-aligned (intransitive)	50	mid	central	0.253888
-0.5	theta	Non-aligned (intransitive)	50	mid	posterior	-1.52702
-0.5	theta	Non-aligned (intransitive)	50	right	frontal	-2.75771
-0.5	theta	Non-aligned (intransitive)	50	right	central	-0.272511
-0.5	theta	Non-aligned (intransitive)	50	right	posterior	-5.09865
-0.5	theta	Non-aligned (intransitive)	7	left	frontal	-0.308071
-0.5	theta	Non-aligned (intransitive)	7	left	central	-0.278377
-0.5	theta	Non-aligned (intransitive)	7	left	posterior	-0.0151982
-0.5	theta	Non-aligned (intransitive)	7	mid	frontal	-0.476583
-0.5	theta	Non-aligned (intransitive)	7	mid	central	0.0278938
-0.5	theta	Non-aligned (intransitive)	7	mid	posterior	-0.227171
-0.5	theta	Non-aligned (intransitive)	7	right	frontal	-0.408336
-0.5	theta	Non-aligned (intransitive)	7	right	central	0.00451323
-0.5	theta	Non-aligned (intransitive)	7	right	posterior	-0.248433
-0.5	theta	Non-aligned (intransitive)	9	left	frontal	-0.30679
-0.5	theta	Non-aligned (intransitive)	9	left	central	-0.275252
-0.5	theta	Non-aligned (intransitive)	9	left	posterior	-0.436431
-0.5	theta	Non-aligned (intransitive)	9	mid	frontal	0.280816
-0.5	theta	Non-aligned (intransitive)	9	mid	central	-0.267393
-0.5	theta	Non-aligned (intransitive)	9	mid	posterior	-0.658604
-0.5	theta	Non-aligned (intransitive)	9	right	frontal	-0.134946
-0.5	theta	Non-aligned (intransitive)	9	right	central	-0.664472
-0.5	theta	Non-aligned (intransitive)	9	right	posterior	-0.810685
-0.4	theta	Aligned (transitive)	10	left	frontal	-0.191763
-0.4	theta	Aligned (transitive)	10	left	central	0.141336
-0.4	theta	Aligned (transitive)	10	left	posterior	0.05233
-0.4	theta	Aligned (transitive)	10	mid	frontal	-0.481883
-0.4	theta	Aligned (transitive)	10	mid	central	-0.0487399
-0.4	theta	Aligned (transitive)	10	mid	posterior	0.143491
-0.4	theta	Aligned (transitive)	10	right	frontal	-0.25451
-0.4	theta	Aligned (transitive)	10	right	central	0.0341452
-0.4	theta	Aligned (transitive)	10	right	posterior	1.00065
-0.4	theta	Aligned (transitive)	12	left	frontal	-0.447726
-0.4	theta	Aligned (transitive)	12	left	central	-0.704327
-0.4	theta	Aligned (transitive)	12	left	posterior	-0.244443
-0.4	theta	Aligned (transitive)	12	mid	frontal	-0.481658
-0.4	theta	Aligned (transitive)	12	mid	central	-0.288139
-0.4	theta	Aligned (transitive)	12	mid	posterior	-0.326721
-0.4	theta	Aligned (transitive)	12	right	frontal	-0.0949282
-0.4	theta	Aligned (transitive)	12	right	central	0.104317
-0.4	theta	Aligned (transitive)	12	right	posterior	-0.119528
-0.4	theta	Aligned (transitive)	14	left	frontal	-0.38575
-0.4	theta	Aligned (transitive)	14	left	central	-0.306978
-0.4	theta	Aligned (transitive)	14	left	posterior	-0.325696
-0.4	theta	Aligned (transitive)	14	mid	frontal	-0.52811
-0.4	theta	Aligned (transitive)	14	mid	central	-0.772426
-0.4	theta	Aligned (transitive)	14	mid	posterior	-0.563259
-0.4	theta	Aligned (transitive)	14	right	frontal	-0.225415
-0.4	theta	Aligned (transitive)	14	right	central	-0.474371
-0.4	theta	Aligned (transitive)	14	right	posterior	-0.270291
-0.4	theta	Aligned (transitive)	16	left	frontal	-0.355523
-0.4	theta	Aligned (transitive)	16	left	central	-0.400107
-0.4	theta	Aligned (transitive)	16	left	posterior	-0.340736
-0.4	theta	Aligned (transitive)	16	mid	frontal	0.0255014
-0.4	theta	Aligned (transitive)	16	mid	central	-0.313036
-0.4	theta	Aligned (transitive)	16	mid	posterior	-0.405107
-0.4	theta	Aligned (transitive)	16	right	frontal	-0.206922
-0.4	theta	Aligned (transitive)	16	right	central	-0.325277
-0.4	theta	Aligned (transitive)	16	right	posterior	-0.461418
-0.4	theta	Aligned (transitive)	18	left	frontal	-0.434706
-0.4	theta	Aligned (transitive)	18	left	central	-0.345694
-0.4	theta	Aligned (transitive)	18	left	posterior	-0.181511
-0.4	theta	Aligned (transitive)	18	mid	frontal	-0.618775
-0.4	theta	Aligned (transitive)	18	mid	central	-0.51288
-0.4	theta	Aligned (transitive)	18	mid	posterior	-0.17409
-0.4	theta	Aligned (transitive)	18	right	frontal	-0.378451
-0.4	theta	Aligned (transitive)	18	right	central	-0.362837
-0.4	theta	Aligned (transitive)	18	right	posterior	-0.0633925
-0.4	theta	Aligned (transitive)	2	left	frontal	-0.759453
-0.4	theta	Aligned (transitive)	2	left	central	-0.615435
-0.4	theta	Aligned (transitive)	2	left	posterior	-0.546273
-0.4	theta	Aligned (transitive)	2	mid	frontal	-0.608319
-0.4	theta	Aligned (transitive)	2	mid	central	-0.795696
-0.4	theta	Aligned (transitive)	2	mid	posterior	-0.401756
-0.4	theta	Aligned (transitive)	2	right	frontal	-0.304563
-0.4	theta	Aligned (transitive)	2	right	central	-0.70171
-0.4	theta	Aligned (transitive)	2	right	posterior	-0.472259
-0.4	theta	Aligned (transitive)	20	left	frontal	1.39843
-0.4	theta	Aligned (transitive)	20	left	central	1.82093
-0.4	theta	Aligned (transitive)	20	left	posterior	0.750171
-0.4	theta	Aligned (transitive)	20	mid	frontal	1.157
-0.4	theta	Aligned (transitive)	20	mid	central	2.31472
-0.4	theta	Aligned (transitive)	20	mid	posterior	1.58001
-0.4	theta	Aligned (transitive)	20	right	frontal	0.648823
-0.4	theta	Aligned (transitive)	20	right	central	2.38493
-0.4	theta	Aligned (transitive)	20	right	posterior	2.46292
-0.4	theta	Aligned (transitive)	22	left	frontal	-0.54929
-0.4	theta	Aligned (transitive)	22	left	central	-0.535366
-0.4	theta	Aligned (transitive)	22	left	posterior	-0.304978
-0.4	theta	Aligned (transitive)	22	mid	frontal	-0.572228
-0.4	theta	Aligned (transitive)	22	mid	central	-0.201833
-0.4	theta	Aligned (transitive)	22	mid	posterior	0.121167
-0.4	theta	Aligned (transitive)	22	right	frontal	-0.760037
-0.4	theta	Aligned (transitive)	22	right	central	-0.660367
-0.4	theta	Aligned (transitive)	22	right	posterior	-0.172075
-0.4	theta	Aligned (transitive)	24	left	frontal	-0.490298
-0.4	theta	Aligned (transitive)	24	left	central	-0.186159
-0.4	theta	Aligned (transitive)	24	left	posterior	-0.415176
-0.4	theta	Aligned (transitive)	24	mid	frontal	-0.296293
-0.4	theta	Aligned (transitive)	24	mid	central	-0.652014
-0.4	theta	Aligned (transitive)	24	mid	posterior	-0.515377
-0.4	theta	Aligned (transitive)	24	right	frontal	-0.759499
-0.4	theta	Aligned (transitive)	24	right	central	-0.363561
-0.4	theta	Aligned (transitive)	24	right	posterior	0.458594
-0.4	theta	Aligned (transitive)	26	left	frontal	-0.0836527
-0.4	theta	Aligned (transitive)	26	left	central	0.104583
-0.4	theta	Aligned (transitive)	26	left	posterior	-0.294599
-0.4	theta	Aligned (transitive)	26	mid	frontal	-0.0583605
-0.4	theta	Aligned (transitive)	26	mid	central	0.206912
-0.4	theta	Aligned (transitive)	26	mid	posterior	-0.245939
-0.4	theta	Aligned (transitive)	26	right	frontal	0.128425
-0.4	theta	Aligned (transitive)	26	right	central	0.102515
-0.4	theta	Aligned (transitive)	26	right	posterior	0.000502853
[truncated: 14,220 more rows]

## Sheet: Fig 2C
Fig 3C: Fitted mean values (and standard errors) from regression trees, theta band activity (terminal nodes are numbered from left to right)
time	sentence.type	value.mean	value.SE	TerminalNode	ROI
0	imperfective_intransitive	-0.000109248	0.0414461	1	LF, LC, MF, MC, RF
0	imperfective_transitive	0.0896037	0.0462161	1	LF, LC, MF, MC, RF
0.1	imperfective_intransitive	0.650266	0.0473402	1	LF, LC, MF, MC, RF
0.1	imperfective_transitive	0.794664	0.0518734	1	LF, LC, MF, MC, RF
0.2	imperfective_intransitive	1.05961	0.0505776	1	LF, LC, MF, MC, RF
0.2	imperfective_transitive	1.16519	0.0542529	1	LF, LC, MF, MC, RF
0.3	imperfective_intransitive	1.17744	0.0495481	1	LF, LC, MF, MC, RF
0.3	imperfective_transitive	1.20694	0.053155	1	LF, LC, MF, MC, RF
0.4	imperfective_intransitive	0.836684	0.0480672	1	LF, LC, MF, MC, RF
0.4	imperfective_transitive	0.870141	0.0519276	1	LF, LC, MF, MC, RF
0.5	imperfective_intransitive	0.466115	0.0476465	1	LF, LC, MF, MC, RF
0.5	imperfective_transitive	0.602898	0.0515967	1	LF, LC, MF, MC, RF
0.6	imperfective_intransitive	0.390172	0.0479504	1	LF, LC, MF, MC, RF
0.6	imperfective_transitive	0.533711	0.0527361	1	LF, LC, MF, MC, RF
0.7	imperfective_intransitive	0.387177	0.0493287	1	LF, LC, MF, MC, RF
0.7	imperfective_transitive	0.559231	0.054413	1	LF, LC, MF, MC, RF
0.8	imperfective_intransitive	0.259041	0.0490402	1	LF, LC, MF, MC, RF
0.8	imperfective_transitive	0.453534	0.0526616	1	LF, LC, MF, MC, RF
0	perfective_intransitive	0.105518	0.0467174	2+3	LF, LC, MF, MC, RF
0	perfective_transitive	-0.0406278	0.0503774	2+3	LF, LC, MF, MC, RF
0.1	perfective_intransitive	0.542006	0.0519021	2+3	LF, LC, MF, MC, RF
0.1	perfective_transitive	0.397818	0.055381	2+3	LF, LC, MF, MC, RF
0.2	perfective_intransitive	0.868782	0.0539416	2+3	LF, LC, MF, MC, RF
0.2	perfective_transitive	0.728994	0.0594939	2+3	LF, LC, MF, MC, RF
0.3	perfective_intransitive	0.91038	0.0545286	2+3	LF, LC, MF, MC, RF
0.3	perfective_transitive	0.80435	0.0588428	2+3	LF, LC, MF, MC, RF
0.4	perfective_intransitive	0.760582	0.0533638	2+3	LF, LC, MF, MC, RF
0.4	perfective_transitive	0.438368	0.0593398	2+3	LF, LC, MF, MC, RF
0.5	perfective_intransitive	0.480351	0.0519128	2+3	LF, LC, MF, MC, RF
0.5	perfective_transitive	0.219491	0.0601114	2+3	LF, LC, MF, MC, RF
0.6	perfective_intransitive	0.280142	0.0513002	2+3	LF, LC, MF, MC, RF
0.6	perfective_transitive	-0.0183375	0.0593238	2+3	LF, LC, MF, MC, RF
0.7	perfective_intransitive	0.0636508	0.051888	2+3	LF, LC, MF, MC, RF
0.7	perfective_transitive	-0.191048	0.0578915	2+3	LF, LC, MF, MC, RF
0.8	perfective_intransitive	0.0901806	0.0501996	2+3	LF, LC, MF, MC, RF
0.8	perfective_transitive	-0.103247	0.0580576	2+3	LF, LC, MF, MC, RF
0	imperfective_intransitive	0.046027	0.0425736	4+5	LP, MP, RC, RP
0	imperfective_transitive	0.361363	0.0463078	4+5	LP, MP, RC, RP
0.1	imperfective_intransitive	1.07532	0.0497198	4+5	LP, MP, RC, RP
0.1	imperfective_transitive	1.34698	0.0530097	4+5	LP, MP, RC, RP
0.2	imperfective_intransitive	1.66398	0.0546222	4+5	LP, MP, RC, RP
0.2	imperfective_transitive	1.90906	0.0579614	4+5	LP, MP, RC, RP
0.3	imperfective_intransitive	1.7469	0.0547936	4+5	LP, MP, RC, RP
0.3	imperfective_transitive	1.92585	0.0598342	4+5	LP, MP, RC, RP
0.4	imperfective_intransitive	1.22294	0.0530568	4+5	LP, MP, RC, RP
0.4	imperfective_transitive	1.38568	0.0565354	4+5	LP, MP, RC, RP
0.5	imperfective_intransitive	0.686417	0.0516286	4+5	LP, MP, RC, RP
0.5	imperfective_transitive	0.87805	0.0548145	4+5	LP, MP, RC, RP
0.6	imperfective_intransitive	0.485187	0.0512392	4+5	LP, MP, RC, RP
0.6	imperfective_transitive	0.746563	0.0560753	4+5	LP, MP, RC, RP
0.7	imperfective_intransitive	0.550063	0.0525	4+5	LP, MP, RC, RP
0.7	imperfective_transitive	0.768609	0.0568356	4+5	LP, MP, RC, RP
0.8	imperfective_intransitive	0.496075	0.0530925	4+5	LP, MP, RC, RP
0.8	imperfective_transitive	0.482223	0.0558834	4+5	LP, MP, RC, RP
0	perfective_intransitive	0.434303	0.0480416	6+7	LP, MP, RC, RP
0	perfective_transitive	0.285651	0.0518204	6+7	LP, MP, RC, RP
0.1	perfective_intransitive	1.29514	0.0559227	6+7	LP, MP, RC, RP
0.1	perfective_transitive	1.09044	0.0611327	6+7	LP, MP, RC, RP
0.2	perfective_intransitive	1.80604	0.0604674	6+7	LP, MP, RC, RP
0.2	perfective_transitive	1.68465	0.0683108	6+7	LP, MP, RC, RP
0.3	perfective_intransitive	1.75858	0.0605204	6+7	LP, MP, RC, RP
0.3	perfective_transitive	1.70258	0.0678356	6+7	LP, MP, RC, RP
0.4	perfective_intransitive	1.17284	0.0577571	6+7	LP, MP, RC, RP
0.4	perfective_transitive	1.11047	0.0665444	6+7	LP, MP, RC, RP
0.5	perfective_intransitive	0.684111	0.0560063	6+7	LP, MP, RC, RP
0.5	perfective_transitive	0.681708	0.0663467	6+7	LP, MP, RC, RP
0.6	perfective_intransitive	0.482334	0.0549603	6+7	LP, MP, RC, RP
0.6	perfective_transitive	0.483421	0.0627339	6+7	LP, MP, RC, RP
0.7	perfective_intransitive	0.335738	0.0541308	6+7	LP, MP, RC, RP
0.7	perfective_transitive	0.349544	0.0616281	6+7	LP, MP, RC, RP
0.8	perfective_intransitive	0.244887	0.0532884	6+7	LP, MP, RC, RP
0.8	perfective_transitive	0.333645	0.0624384	6+7	LP, MP, RC, RP

## Sheet: Fig 2D
Fig 2D: t values for topoplots for theta ES
time (ms)	electrode	t
0	E1	-0.1084
0	E2	0.2475
0	E3	0.255
0	E4	0.3236
0	E5	-0.6876
0	E6	-0.3392
0	E7	-0.3732
0	E9	-0.613
0	E10	-0.7746
0	E11	0.2385
0	E12	-0.1167
0	E13	0.1519
0	E15	-0.2339
0	E16	-0.6147
0	E18	-0.5358
0	E19	0.0019
0	E20	0.4137
0	E22	-0.4024
0	E23	-0.0636
0	E24	-0.0539
0	E26	1.9565
0	E27	1.5184
0	E28	0.7456
0	E29	-0.0398
0	E30	-0.035
0	E31	-0.525
0	E32	2.0667
0	E33	2.0658
0	E34	1.2503
0	E35	0.1158
0	E36	-0.5978
0	E37	-0.7315
0	E38	0.0888
0	E39	0.7036
0	E40	1.0433
0	E41	0.0388
0	E42	-0.7901
0	E43	1.1023
0	E44	0.5824
0	E45	1.1859
0	E46	0.5248
0	E47	0.0398
0	E48	1.3829
0	E49	0.4368
0	E50	0.4099
0	E51	0.3289
0	E52	-0.4629
0	E53	-0.8131
0	E54	-1.7885
0	E55	-0.8652
0	E56	0.8282
0	E58	0.3004
0	E59	-2.1715
0	E60	-1.2773
0	E61	-1.5797
0	E62	-1.8562
0	E63	0.3567
0	E64	1.9187
0	E65	-0.3848
0	E66	-1.1553
0	E67	-2.5404
0	E68	1.854
0	E69	-0.2054
0	E70	-0.7457
0	E71	-2.2083
0	E72	-2.6101
0	E73	1.6835
0	E74	-0.3845
0	E75	-1.9549
0	E76	-2.1271
0	E77	-2.6013
0	E78	-1.755
0	E79	-1.5452
0	E80	-1.1734
0	E81	-0.6267
0	E82	-1.1449
0	E83	-2.9246
0	E84	-3.0642
0	E85	-2.2052
0	E86	-0.9935
0	E87	-0.2375
0	E88	-0.5889
0	E89	-0.6522
0	E90	-1.6616
0	E91	-1.7997
0	E92	-0.848
0	E93	0.8576
0	E94	0.2865
0	E95	-1.9664
0	E96	-0.9031
0	E97	-0.5533
0	E98	1.378
0	E99	0.801
0	E101	0.1883
0	E102	0.1267
0	E103	1.0851
0	E104	0.5603
0	E105	-0.1752
0	E106	-0.7176
0	E107	0.6142
0	E108	1.0871
0	E109	0.1364
0	E110	-0.1619
0	E111	-0.813
0	E112	-0.0661
0	E113	-0.4178
0	E114	0.5177
0	E115	0.2318
0	E116	0.1615
0	E117	-0.568
0	E118	-0.9213
0	E119	0.3851
0	E120	-0.2274
0	E121	-1.2829
0	E122	-0.0038
0	E123	0.1361
0	E124	-0.4978
0	Cz	-0.5843
100	E1	1.7974
100	E2	2.7765
100	E3	1.8725
100	E4	1.5275
100	E5	0.6124
100	E6	0.755
100	E7	0.3441
100	E9	0.544
100	E10	1.4513
100	E11	1.5634
100	E12	0.8344
100	E13	0.7166
100	E15	0.6751
100	E16	1.1902
100	E18	1.1786
100	E19	0.656
100	E20	1.1077
100	E22	1.8861
100	E23	0.6088
100	E24	1.0623
100	E26	3.614
100	E27	2.8086
100	E28	2.122
100	E29	0.9142
100	E30	0.2419
100	E31	-0.445
100	E32	6.5427
100	E33	4.5863
100	E34	2.2976
100	E35	0.2366
100	E36	0.2657
100	E37	-0.3923
100	E38	3.3027
100	E39	2.2994
100	E40	0.5463
100	E41	0.6578
100	E42	0.3889
100	E43	3.7757
100	E44	3.5593
100	E45	1.7277
100	E46	1.7591
100	E47	1.1638
100	E48	2.7448
100	E49	1.7177
100	E50	0.3804
100	E51	1.0311
100	E52	-0.1217
100	E53	0.6435
100	E54	-0.646
100	E55	0.2705
100	E56	0.6329
100	E58	-0.4387
100	E59	-1.7811
100	E60	-0.9373
100	E61	-0.3272
100	E62	-1.1122
100	E63	0.7
100	E64	1.5777
100	E65	-0.6474
100	E66	-0.7504
100	E67	-2.7194
100	E68	2.067
100	E69	-0.5495
100	E70	-1.1075
100	E71	-1.9363
100	E72	-1.9128
100	E73	1.013
100	E74	-0.3839
100	E75	-2.4113
100	E76	-2.1468
100	E77	-2.2029
100	E78	-0.5577
100	E79	0.844
100	E80	0.454
100	E81	0.0661
100	E82	-0.3142
100	E83	-1.7563
100	E84	-2.7586
100	E85	-0.5856
100	E86	0.455
100	E87	1.2101
100	E88	0.3177
100	E89	0.3298
100	E90	-0.7139
100	E91	-0.8902
100	E92	0.7123
100	E93	1.8786
100	E94	1.3159
100	E95	0.9896
100	E96	-0.201
100	E97	0.8345
100	E98	2.2227
100	E99	0.9362
100	E101	1.6212
100	E102	1.2554
100	E103	1.5844
100	E104	1.8035
100	E105	0.9446
100	E106	0.0787
100	E107	1.2768
100	E108	1.5474
100	E109	0.1916
100	E110	0.6103
100	E111	0.8634
100	E112	0.5107
100	E113	1.7914
100	E114	2.801
100	E115	1.35
100	E116	1.377
100	E117	1.472
100	E118	1.3747
100	E119	1.4813
100	E120	1.9304
100	E121	0.5875
100	E122	2.0685
100	E123	1.962
100	E124	1.5545
100	Cz	0.0296
200	E1	2.2906
200	E2	4.4544
200	E3	2.5741
200	E4	2.2046
200	E5	2.0535
200	E6	2.7159
200	E7	2.2447
200	E9	2.0636
200	E10	2.3472
200	E11	2.1581
200	E12	1.8946
200	E13	2.3997
200	E15	2.5698
200	E16	2.3549
200	E18	2.2794
200	E19	1.4809
200	E20	2.3688
200	E22	3.4688
200	E23	1.9146
200	E24	2.5681
200	E26	4.9592
200	E27	3.2218
200	E28	2.8938
200	E29	2.1496
200	E30	2.3273
200	E31	1.5933
200	E32	7.3388
200	E33	5.065
200	E34	2.4928
200	E35	1.7242
200	E36	2.3116
200	E37	1.1007
200	E38	4.9909
200	E39	3.2959
200	E40	1.3744
200	E41	1.2097
200	E42	2.3438
200	E43	5.1875
200	E44	4.9006
200	E45	2.6304
200	E46	3.1039
200	E47	1.793
200	E48	3.7718
200	E49	2.4294
200	E50	1.6835
200	E51	1.5972
200	E52	1.2502
200	E53	1.9998
200	E54	2.0658
200	E55	2.8793
200	E56	0.1809
200	E58	-0.7632
200	E59	-0.7477
200	E60	0.5366
200	E61	0.4328
200	E62	0.5592
200	E63	0.7063
200	E64	-0.6044
200	E65	-0.7302
200	E66	0.5783
200	E67	-1.1136
200	E68	0.4307
200	E69	-1.1887
200	E70	-1.7741
200	E71	-0.6679
200	E72	-0.6313
200	E73	0.7614
200	E74	-0.6989
200	E75	-2.2441
200	E76	-1.5439
200	E77	-0.0593
200	E78	1.5352
200	E79	2.9477
200	E80	3.1333
200	E81	-1.1454
200	E82	0.1432
200	E83	-0.7535
200	E84	-1.1314
200	E85	1.7473
200	E86	3.1448
200	E87	3.2469
200	E88	0.6061
200	E89	0.9387
200	E90	1.3848
200	E91	0.7238
200	E92	2.1458
200	E93	3.6703
200	E94	0.418
200	E95	2.6511
200	E96	2.4756
200	E97	1.965
200	E98	3.7976
200	E99	2.0921
200	E101	3.4927
200	E102	2.5804
200	E103	3.065
200	E104	3.0467
200	E105	3.1294
200	E106	2.1801
200	E107	2.4353
200	E108	1.3389
200	E109	0.8492
200	E110	1.5138
200	E111	2.6121
200	E112	2.9583
200	E113	0.9556
200	E114	2.9437
200	E115	1.277
200	E116	1.5732
200	E117	2.5185
200	E118	3.0908
200	E119	0.2951
200	E120	2.7491
200	E121	1.0167
200	E122	2.7372
200	E123	2.1861
200	E124	2.7248
200	Cz	2.3269
300	E1	2.3398
300	E2	3.4916
300	E3	2.0857
300	E4	2.313
300	E5	2.0812
300	E6	3.0334
300	E7	1.3061
300	E9	1.4225
300	E10	1.7246
300	E11	2.105
300	E12	2.2556
300	E13	1.7965
300	E15	2.2263
300	E16	1.7462
300	E18	1.7338
300	E19	1.8172
300	E20	2.3543
300	E22	2.323
300	E23	1.0143
300	E24	1.6937
300	E26	4.0789
300	E27	1.7614
300	E28	2.3012
300	E29	1.6656
300	E30	1.9672
300	E31	1.2863
300	E32	4.8831
300	E33	3.0894
300	E34	2.1888
300	E35	1.1959
300	E36	1.4945
300	E37	0.549
300	E38	3.7335
300	E39	2.8198
300	E40	1.1592
300	E41	1.2895
300	E42	2.1556
300	E43	3.8671
300	E44	4.0195
300	E45	2.2528
300	E46	2.4137
300	E47	1.8077
300	E48	3.4924
300	E49	2.711
300	E50	2.0147
300	E51	3.4845
300	E52	2.1289
300	E53	1.8375
300	E54	1.6765
300	E55	2.7646
300	E56	0.4673
300	E58	0.9289
300	E59	1.2479
300	E60	1.3032
300	E61	0.3944
300	E62	0.7724
300	E63	0.8237
300	E64	0.4265
300	E65	1.3061
300	E66	2.9928
300	E67	-0.0133
300	E68	0.6994
300	E69	-0.2307
300	E70	0.4213
300	E71	-0.0732
300	E72	0.2603
300	E73	0.7141
300	E74	-0.8039
300	E75	-1.1172
300	E76	-1.1388
300	E77	0.0002
300	E78	1.8428
300	E79	2.7936
300	E80	2.2604
300	E81	0.0398
300	E82	0.6415
300	E83	-0.5332
300	E84	-1.2419
300	E85	1.5522
300	E86	2.409
300	E87	2.7878
300	E88	0.3012
300	E89	0.964
300	E90	-0.3156
300	E91	0.1189
300	E92	1.5444
300	E93	3.7648
300	E94	0.4956
300	E95	1.468
300	E96	1.7361
300	E97	1.324
300	E98	3.7291
300	E99	3.3125
300	E101	2.3756
300	E102	2.3984
300	E103	2.6834
300	E104	2.3803
300	E105	2.7459
300	E106	1.7256
300	E107	3.4763
300	E108	2.0833
300	E109	1.2118
300	E110	1.6391
300	E111	2.3366
300	E112	2.8121
300	E113	1.0324
300	E114	2.0179
300	E115	0.5287
300	E116	0.465
300	E117	1.7801
300	E118	2.9861
300	E119	-0.0953
300	E120	3.0634
300	E121	0.6022
300	E122	2.775
300	E123	1.72
300	E124	2.2319
300	Cz	1.9409
400	E1	1.517
400	E2	1.4903
400	E3	1.2669
400	E4	0.9824
400	E5	0.4701
400	E6	1.4546
400	E7	-0.3172
400	E9	0.6822
400	E10	1.1005
400	E11	1.5931
400	E12	0.8845
400	E13	0.0208
400	E15	2.1321
400	E16	0.862
400	E18	0.9954
400	E19	1.0128
400	E20	0.5289
400	E22	0.9983
400	E23	-0.1338
400	E24	0.0086
400	E26	0.0397
400	E27	0.006
400	E28	-0.3033
400	E29	-0.2796
400	E30	0.3952
400	E31	-0.3297
400	E32	1.7192
400	E33	-0.2719
400	E34	-0.0555
400	E35	-1.0342
400	E36	-0.3202
400	E37	-0.8246
400	E38	2.3766
400	E39	-0.561
400	E40	-0.7888
400	E41	-0.0021
400	E42	0.1702
400	E43	1.4102
400	E44	1.5178
400	E45	0.5648
400	E46	0.4539
400	E47	0.668
400	E48	1.9371
400	E49	1.2694
400	E50	0.7123
400	E51	2.2942
400	E52	0.58
400	E53	-0.4727
400	E54	0.246
400	E55	1.0185
400	E56	-0.3476
400	E58	1.1129
400	E59	1.8503
400	E60	0.6876
400	E61	-0.211
400	E62	-0.3384
400	E63	-0.1182
400	E64	1.2837
400	E65	1.8374
400	E66	2.7898
400	E67	0.0686
400	E68	0.5243
400	E69	-0.3491
400	E70	1.5238
400	E71	-0.2764
400	E72	0.2318
400	E73	1.4748
400	E74	0.5302
400	E75	-0.6618
400	E76	-1.6954
400	E77	-0.6089
400	E78	-0.3246
400	E79	1.1007
400	E80	0.6423
400	E81	1.3095
400	E82	1.8055
400	E83	-1.6286
400	E84	-2.5693
400	E85	-0.4079
400	E86	0.1031
400	E87	0.6198
400	E88	0.2895
400	E89	1.2518
400	E90	-3.0628
400	E91	-1.7424
400	E92	-0.5559
400	E93	1.1958
400	E94	0.6224
400	E95	-0.2305
400	E96	-1.6113
400	E97	-1.0138
400	E98	1.3081
400	E99	2.9771
400	E101	0.8657
400	E102	0.8901
400	E103	1.2546
400	E104	0.5228
400	E105	0.7776
400	E106	0.4096
400	E107	2.3775
400	E108	0.9066
400	E109	0.3575
400	E110	0.4772
400	E111	0.5086
400	E112	0.9316
400	E113	-0.4974
400	E114	0.5947
400	E115	-0.2663
400	E116	-0.6317
400	E117	0.4337
400	E118	1.365
400	E119	-1.0474
400	E120	0.6446
400	E121	-0.7
400	E122	1.5636
400	E123	0.9714
400	E124	1.3199
400	Cz	-0.3063
500	E1	0.2012
500	E2	0.6943
500	E3	0.2639
500	E4	0.7091
500	E5	0.1244
500	E6	1.1899
500	E7	0.4264
500	E9	0.2292
500	E10	0.8876
500	E11	0.8709
500	E12	0.5799
500	E13	0.3456
500	E15	1.0243
500	E16	-0.2539
500	E18	-0.2979
500	E19	-0.0286
500	E20	0.4615
500	E22	0.0788
500	E23	-0.2388
500	E24	0.192
500	E26	-0.853
500	E27	-0.0902
500	E28	-0.2386
500	E29	-0.1682
500	E30	0.5639
500	E31	0.1487
500	E32	0.2635
500	E33	-0.5614
500	E34	-0.6892
500	E35	-0.1114
500	E36	0.4163
500	E37	0.2827
500	E38	1.1409
500	E39	-0.3483
500	E40	-0.3346
500	E41	0.6505
500	E42	0.4264
500	E43	1.0549
500	E44	-0.5719
500	E45	0.1225
500	E46	0.4384
500	E47	0.9127
500	E48	1.5103
500	E49	2.1237
500	E50	0.3594
500	E51	2.4885
500	E52	1.5139
500	E53	0.3506
500	E54	0.3546
500	E55	0.7108
500	E56	0.7327
500	E58	1.2701
500	E59	2.5957
500	E60	1.3784
500	E61	0.9781
500	E62	-0.0275
500	E63	-1.4719
500	E64	-0.0037
500	E65	2.5309
500	E66	3.0551
500	E67	0.9225
500	E68	0.3789
500	E69	-0.2971
500	E70	0.774
500	E71	0.0329
500	E72	-0.3942
500	E73	1.8894
500	E74	0.6007
500	E75	-0.5456
500	E76	-1.3477
500	E77	-0.9171
500	E78	-0.5194
500	E79	0.8205
500	E80	0.6663
500	E81	1.552
500	E82	1.788
500	E83	-2.4437
500	E84	-3.371
500	E85	-1.2383
500	E86	-0.0943
500	E87	0.7453
500	E88	0.7726
500	E89	0.3462
500	E90	-3.6902
500	E91	-1.6836
500	E92	-0.6319
500	E93	1.0267
500	E94	1.6868
500	E95	-1.4022
500	E96	-2.6398
500	E97	-1.6566
500	E98	0.5501
500	E99	2.452
500	E101	-1.1659
500	E102	-0.4608
500	E103	1.0381
500	E104	0.7289
500	E105	0.9557
500	E106	0.0343
500	E107	1.826
500	E108	0.3031
500	E109	-1.143
500	E110	0.3925
500	E111	0.7745
500	E112	0.719
500	E113	0.47
500	E114	-0.0741
500	E115	-0.2448
500	E116	-1.2523
500	E117	-0.0212
500	E118	0.3021
500	E119	-0.891
500	E120	0.2571
500	E121	-1.1918
500	E122	0.5002
500	E123	0.206
500	E124	0.4945
500	Cz	0.1903
600	E1	0.98
600	E2	1.5562
600	E3	1.4331
600	E4	1.8031
600	E5	0.7445
600	E6	1.0272
600	E7	1.0977
600	E9	1.3065
600	E10	2.0228
600	E11	1.2498
600	E12	0.4296
600	E13	0.3485
600	E15	1.8206
600	E16	1.1119
600	E18	0.7311
600	E19	0.7511
600	E20	0.2314
600	E22	1.4564
600	E23	1.481
600	E24	1.3536
600	E26	0.8841
600	E27	1.8655
600	E28	1.006
600	E29	0.7301
600	E30	0.8678
600	E31	0.8046
600	E32	0.5191
600	E33	0.8024
600	E34	0.7591
600	E35	0.6836
600	E36	0.7432
600	E37	1.5341
600	E38	1.68
600	E39	1.0144
600	E40	0.6783
600	E41	0.9088
600	E42	1.5699
600	E43	1.4277
600	E44	0.4797
600	E45	0.4666
600	E46	0.5858
600	E47	1.8548
600	E48	1.6272
600	E49	1.6683
600	E50	0.739
600	E51	2.3464
600	E52	1.7823
600	E53	1.3258
600	E54	1.2208
600	E55	1.2034
600	E56	0.592
600	E58	2.3298
600	E59	2.9456
600	E60	1.5502
600	E61	1.3326
600	E62	0.2127
600	E63	-0.602
600	E64	0.31
600	E65	1.8808
600	E66	2.2949
600	E67	0.5824
600	E68	2.0314
600	E69	0.9643
600	E70	0.6335
600	E71	0.4404
600	E72	0.1565
600	E73	2.6829
600	E74	2.3814
600	E75	0.642
600	E76	-0.4672
600	E77	0.3644
600	E78	0.1841
600	E79	0.4031
600	E80	0.8585
600	E81	2.4339
600	E82	3.0297
600	E83	-1.1218
600	E84	-1.954
600	E85	0.1658
600	E86	0.1592
600	E87	0.1731
600	E88	1.1776
600	E89	0.9787
600	E90	-2.0414
600	E91	0.0675
600	E92	0.0235
600	E93	1.7463
600	E94	2.634
600	E95	0.5045
600	E96	-1.4346
600	E97	0.3256
600	E98	1.6022
600	E99	3.0394
600	E101	0.2652
600	E102	0.4902
600	E103	1.8368
600	E104	1.3334
600	E105	1.1521
600	E106	1.2884
600	E107	3.3606
600	E108	1.0286
600	E109	-0.1241
600	E110	0.9128
600	E111	1.1074
600	E112	1.7757
600	E113	1.9498
600	E114	1.3267
600	E115	0.1764
600	E116	0.1736
600	E117	0.8319
600	E118	1.2086
600	E119	0.5926
600	E120	2.1655
600	E121	0.5731
600	E122	0.9045
600	E123	1.2992
600	E124	1.7101
600	Cz	0.407
700	E1	2.2647
700	E2	2.2002
700	E3	2.2583
700	E4	2.1668
700	E5	0.9244
700	E6	0.9673
700	E7	1.0801
700	E9	2.0221
700	E10	2.4108
700	E11	2.0014
700	E12	0.6949
700	E13	0.2258
700	E15	2.8062
700	E16	1.862
700	E18	1.4754
700	E19	1.9163
700	E20	1.1994
700	E22	2.4403
700	E23	2.63
700	E24	1.4132
700	E26	2.4315
700	E27	2.5566
700	E28	0.607
700	E29	1.0188
700	E30	0.084
700	E31	0.2106
700	E32	1.5638
700	E33	2.4224
700	E34	0.796
700	E35	-0.0022
700	E36	0.2351
700	E37	0.423
700	E38	2.5561
700	E39	0.951
700	E40	1.0217
700	E41	-0.0317
700	E42	0.4852
700	E43	1.23
700	E44	1.8438
700	E45	1.1339
700	E46	-0.1328
700	E47	0.4786
700	E48	1.1999
700	E49	1.7543
700	E50	0.5196
700	E51	0.3003
700	E52	0.3345
700	E53	0.4275
700	E54	0.6665
700	E55	1.3378
700	E56	1.7644
700	E58	1.5843
700	E59	1.0731
700	E60	0.9244
700	E61	0.2542
700	E62	0.2424
700	E63	1.1238
700	E64	1.2193
700	E65	0.8776
700	E66	1.7017
700	E67	1.0527
700	E68	2.5099
700	E69	1.6367
700	E70	1.3084
700	E71	0.6281
700	E72	0.8556
700	E73	2.8687
700	E74	3.1038
700	E75	0.8985
700	E76	0.32
700	E77	0.9955
700	E78	0.779
700	E79	0.2906
700	E80	0.8429
700	E81	2.3086
700	E82	4.0004
700	E83	-0.3203
700	E84	-0.1645
700	E85	1.478
700	E86	1.5532
700	E87	0.9753
700	E88	1.6829
700	E89	1.8027
700	E90	-1.0494
700	E91	1.3178
700	E92	1.222
700	E93	2.5851
700	E94	3.3284
700	E95	2.0694
700	E96	-0.9654
700	E97	0.8001
700	E98	2.0853
700	E99	3.3421
700	E101	0.3151
700	E102	1.2515
700	E103	2.7296
700	E104	1.2697
700	E105	1.5645
700	E106	0.797
700	E107	3.758
700	E108	1.6334
700	E109	1.0818
700	E110	1.0366
700	E111	1.7775
700	E112	1.6897
700	E113	2.7936
700	E114	2.5072
700	E115	1.3607
700	E116	0.6313
700	E117	1.7317
700	E118	1.798
700	E119	1.1191
700	E120	3.4796
700	E121	1.9432
700	E122	1.4371
700	E123	1.4434
700	E124	2.2006
700	Cz	0.36
800	E1	2.1708
800	E2	2.7097
800	E3	2.3191
800	E4	1.9259
800	E5	0.8399
800	E6	0.7189
800	E7	0.3028
800	E9	1.9267
800	E10	2.5804
800	E11	1.7965
800	E12	1.2075
800	E13	0.0841
800	E15	3.2834
800	E16	1.8978
800	E18	1.8462
800	E19	1.4077
800	E20	1.2754
800	E22	2.7047
800	E23	2.48
800	E24	1.2622
800	E26	2.5892
800	E27	2.7098
800	E28	0.6487
800	E29	0.5942
800	E30	-0.5061
800	E31	-0.1277
800	E32	2.1501
800	E33	2.9141
800	E34	0.6111
800	E35	0.0083
800	E36	0.2553
800	E37	-0.5913
800	E38	2.3833
800	E39	0.4537
800	E40	0.0823
800	E41	-0.5797
800	E42	-0.0987
800	E43	1.4748
800	E44	1.099
800	E45	0.7775
800	E46	-0.0074
800	E47	0.3203
800	E48	0.929
800	E49	1.051
800	E50	0.4614
800	E51	-0.1506
800	E52	-0.1343
800	E53	-0.1612
800	E54	0.0953
800	E55	0.5832
800	E56	1.5232
800	E58	1.0586
800	E59	1.1217
800	E60	0.5511
800	E61	-1.0534
800	E62	-0.1114
800	E63	1.2267
800	E64	1.6671
800	E65	-0.1729
800	E66	1.115
800	E67	0.4704
800	E68	3.1445
800	E69	0.9147
800	E70	1.1633
800	E71	0.7003
800	E72	0.4574
800	E73	3.8128
800	E74	2.8392
800	E75	1.0236
800	E76	0.4376
800	E77	0.7992
800	E78	0.0439
800	E79	0.4509
800	E80	0.8072
800	E81	3.348
800	E82	4.1423
800	E83	0.6979
800	E84	0.4149
800	E85	1.4515
800	E86	0.791
800	E87	1.2574
800	E88	2.2056
800	E89	1.8907
800	E90	0.563
800	E91	0.7311
800	E92	0.6968
800	E93	1.7761
800	E94	3.7314
800	E95	2.9847
800	E96	-0.0484
800	E97	0.3748
800	E98	1.208
800	E99	3.5657
800	E101	0.4196
800	E102	-0.4332
800	E103	1.9516
800	E104	1.1081
800	E105	1.6439
800	E106	1.0447
800	E107	3.2437
800	E108	1.6414
800	E109	0.8089
800	E110	0.806
800	E111	1.514
800	E112	1.3556
800	E113	1.7997
800	E114	2.8285
800	E115	1.9139
800	E116	0.8418
800	E117	1.9236
800	E118	1.7689
800	E119	0.8538
800	E120	2.8626
800	E121	2.2728
800	E122	0.9005
800	E123	1.481
800	E124	1.6066
800	Cz	-0.159

## Sheet: Fig 3B
Fig 3B: By-participant means for alpha band activity
time	FreqBand_individual	sentence.type	Subject	x	y	dB_change.mean
-0.6	alpha	Aligned (transitive)	10	left	frontal	-0.37608
-0.6	alpha	Aligned (transitive)	10	left	central	-0.297633
-0.6	alpha	Aligned (transitive)	10	left	posterior	0.353561
-0.6	alpha	Aligned (transitive)	10	mid	frontal	0.234389
-0.6	alpha	Aligned (transitive)	10	mid	central	-0.462625
-0.6	alpha	Aligned (transitive)	10	mid	posterior	0.0418472
-0.6	alpha	Aligned (transitive)	10	right	frontal	-0.696766
-0.6	alpha	Aligned (transitive)	10	right	central	-1.19604
-0.6	alpha	Aligned (transitive)	10	right	posterior	0.434387
-0.6	alpha	Aligned (transitive)	12	left	frontal	-0.120823
-0.6	alpha	Aligned (transitive)	12	left	central	-0.101867
-0.6	alpha	Aligned (transitive)	12	left	posterior	-0.200694
-0.6	alpha	Aligned (transitive)	12	mid	frontal	0.177524
-0.6	alpha	Aligned (transitive)	12	mid	central	-0.311209
-0.6	alpha	Aligned (transitive)	12	mid	posterior	-0.680562
-0.6	alpha	Aligned (transitive)	12	right	frontal	0.299779
-0.6	alpha	Aligned (transitive)	12	right	central	-0.146541
-0.6	alpha	Aligned (transitive)	12	right	posterior	-0.146014
-0.6	alpha	Aligned (transitive)	14	left	frontal	-0.280904
-0.6	alpha	Aligned (transitive)	14	left	central	-0.321506
-0.6	alpha	Aligned (transitive)	14	left	posterior	-0.378949
-0.6	alpha	Aligned (transitive)	14	mid	frontal	-0.433521
-0.6	alpha	Aligned (transitive)	14	mid	central	-0.473644
-0.6	alpha	Aligned (transitive)	14	mid	posterior	-0.943757
-0.6	alpha	Aligned (transitive)	14	right	frontal	-0.462556
-0.6	alpha	Aligned (transitive)	14	right	central	-0.431749
-0.6	alpha	Aligned (transitive)	14	right	posterior	-0.392296
-0.6	alpha	Aligned (transitive)	16	left	frontal	-0.521494
-0.6	alpha	Aligned (transitive)	16	left	central	-0.383236
-0.6	alpha	Aligned (transitive)	16	left	posterior	-0.809807
-0.6	alpha	Aligned (transitive)	16	mid	frontal	-1.02783
-0.6	alpha	Aligned (transitive)	16	mid	central	-0.239648
-0.6	alpha	Aligned (transitive)	16	mid	posterior	-1.05145
-0.6	alpha	Aligned (transitive)	16	right	frontal	-0.411849
-0.6	alpha	Aligned (transitive)	16	right	central	-0.56517
-0.6	alpha	Aligned (transitive)	16	right	posterior	-1.0609
-0.6	alpha	Aligned (transitive)	18	left	frontal	-0.195832
-0.6	alpha	Aligned (transitive)	18	left	central	0.398271
-0.6	alpha	Aligned (transitive)	18	left	posterior	0.19597
-0.6	alpha	Aligned (transitive)	18	mid	frontal	-0.491161
-0.6	alpha	Aligned (transitive)	18	mid	central	-0.033454
-0.6	alpha	Aligned (transitive)	18	mid	posterior	0.146425
-0.6	alpha	Aligned (transitive)	18	right	frontal	-0.46956
-0.6	alpha	Aligned (transitive)	18	right	central	0.243899
-0.6	alpha	Aligned (transitive)	18	right	posterior	0.481164
-0.6	alpha	Aligned (transitive)	2	left	frontal	0.181759
-0.6	alpha	Aligned (transitive)	2	left	central	-0.481401
-0.6	alpha	Aligned (transitive)	2	left	posterior	-0.210918
-0.6	alpha	Aligned (transitive)	2	mid	frontal	-0.201579
-0.6	alpha	Aligned (transitive)	2	mid	central	-0.107809
-0.6	alpha	Aligned (transitive)	2	mid	posterior	0.600425
-0.6	alpha	Aligned (transitive)	2	right	frontal	-0.442998
-0.6	alpha	Aligned (transitive)	2	right	central	0.120928
-0.6	alpha	Aligned (transitive)	2	right	posterior	1.18598
-0.6	alpha	Aligned (transitive)	20	left	frontal	1.24878
-0.6	alpha	Aligned (transitive)	20	left	central	0.728913
-0.6	alpha	Aligned (transitive)	20	left	posterior	0.696404
-0.6	alpha	Aligned (transitive)	20	mid	frontal	-0.387605
-0.6	alpha	Aligned (transitive)	20	mid	central	-0.637677
-0.6	alpha	Aligned (transitive)	20	mid	posterior	-0.635413
-0.6	alpha	Aligned (transitive)	20	right	frontal	-0.295217
-0.6	alpha	Aligned (transitive)	20	right	central	-0.549222
-0.6	alpha	Aligned (transitive)	20	right	posterior	-0.897276
-0.6	alpha	Aligned (transitive)	22	left	frontal	-0.191353
-0.6	alpha	Aligned (transitive)	22	left	central	-0.0698327
-0.6	alpha	Aligned (transitive)	22	left	posterior	0.528152
-0.6	alpha	Aligned (transitive)	22	mid	frontal	-0.19239
-0.6	alpha	Aligned (transitive)	22	mid	central	-0.287153
-0.6	alpha	Aligned (transitive)	22	mid	posterior	-0.369929
-0.6	alpha	Aligned (transitive)	22	right	frontal	0.043845
-0.6	alpha	Aligned (transitive)	22	right	central	0.0590842
-0.6	alpha	Aligned (transitive)	22	right	posterior	0.259705
-0.6	alpha	Aligned (transitive)	24	left	frontal	-0.39634
-0.6	alpha	Aligned (transitive)	24	left	central	-0.255199
-0.6	alpha	Aligned (transitive)	24	left	posterior	0.199035
-0.6	alpha	Aligned (transitive)	24	mid	frontal	-0.0247319
-0.6	alpha	Aligned (transitive)	24	mid	central	-0.306693
-0.6	alpha	Aligned (transitive)	24	mid	posterior	0.241332
-0.6	alpha	Aligned (transitive)	24	right	frontal	0.0447334
-0.6	alpha	Aligned (transitive)	24	right	central	-0.511384
-0.6	alpha	Aligned (transitive)	24	right	posterior	-0.260035
-0.6	alpha	Aligned (transitive)	26	left	frontal	-0.311166
-0.6	alpha	Aligned (transitive)	26	left	central	-0.0700595
-0.6	alpha	Aligned (transitive)	26	left	posterior	-0.518703
-0.6	alpha	Aligned (transitive)	26	mid	frontal	-0.43211
-0.6	alpha	Aligned (transitive)	26	mid	central	0.0270204
-0.6	alpha	Aligned (transitive)	26	mid	posterior	-0.350191
-0.6	alpha	Aligned (transitive)	26	right	frontal	-0.300369
-0.6	alpha	Aligned (transitive)	26	right	central	-0.220281
-0.6	alpha	Aligned (transitive)	26	right	posterior	-0.470166
-0.6	alpha	Aligned (transitive)	28	left	frontal	-1.19021
-0.6	alpha	Aligned (transitive)	28	left	central	-0.84565
-0.6	alpha	Aligned (transitive)	28	left	posterior	-0.431564
-0.6	alpha	Aligned (transitive)	28	mid	frontal	-0.877068
-0.6	alpha	Aligned (transitive)	28	mid	central	-0.419047
-0.6	alpha	Aligned (transitive)	28	mid	posterior	-0.478341
-0.6	alpha	Aligned (transitive)	28	right	frontal	-1.09245
-0.6	alpha	Aligned (transitive)	28	right	central	-1.01655
-0.6	alpha	Aligned (transitive)	28	right	posterior	-0.881751
-0.6	alpha	Aligned (transitive)	30	left	frontal	0.260892
-0.6	alpha	Aligned (transitive)	30	left	central	-0.0684576
-0.6	alpha	Aligned (transitive)	30	left	posterior	0.112598
-0.6	alpha	Aligned (transitive)	30	mid	frontal	0.265547
-0.6	alpha	Aligned (transitive)	30	mid	central	-0.184111
-0.6	alpha	Aligned (transitive)	30	mid	posterior	-0.0280972
-0.6	alpha	Aligned (transitive)	30	right	frontal	0.295094
-0.6	alpha	Aligned (transitive)	30	right	central	0.538956
-0.6	alpha	Aligned (transitive)	30	right	posterior	0.745607
-0.6	alpha	Aligned (transitive)	32	left	frontal	-0.896836
-0.6	alpha	Aligned (transitive)	32	left	central	-1.28703
-0.6	alpha	Aligned (transitive)	32	left	posterior	-0.683719
-0.6	alpha	Aligned (transitive)	32	mid	frontal	-0.433335
-0.6	alpha	Aligned (transitive)	32	mid	central	-0.644564
-0.6	alpha	Aligned (transitive)	32	mid	posterior	-0.30673
-0.6	alpha	Aligned (transitive)	32	right	frontal	-0.291738
-0.6	alpha	Aligned (transitive)	32	right	central	0.19438
-0.6	alpha	Aligned (transitive)	32	right	posterior	0.128681
-0.6	alpha	Aligned (transitive)	34	left	frontal	-0.0176027
-0.6	alpha	Aligned (transitive)	34	left	central	-0.0759317
-0.6	alpha	Aligned (transitive)	34	left	posterior	0.0742752
-0.6	alpha	Aligned (transitive)	34	mid	frontal	-0.187687
-0.6	alpha	Aligned (transitive)	34	mid	central	-0.189948
-0.6	alpha	Aligned (transitive)	34	mid	posterior	0.484864
-0.6	alpha	Aligned (transitive)	34	right	frontal	-0.295369
-0.6	alpha	Aligned (transitive)	34	right	central	-0.113284
-0.6	alpha	Aligned (transitive)	34	right	posterior	-0.0160586
-0.6	alpha	Aligned (transitive)	36	left	frontal	-0.850463
-0.6	alpha	Aligned (transitive)	36	left	central	-0.951629
-0.6	alpha	Aligned (transitive)	36	left	posterior	-0.846082
-0.6	alpha	Aligned (transitive)	36	mid	frontal	-0.922604
-0.6	alpha	Aligned (transitive)	36	mid	central	-0.660809
-0.6	alpha	Aligned (transitive)	36	mid	posterior	-0.941044
-0.6	alpha	Aligned (transitive)	36	right	frontal	-0.211995
-0.6	alpha	Aligned (transitive)	36	right	central	-0.764033
-0.6	alpha	Aligned (transitive)	36	right	posterior	-1.41082
-0.6	alpha	Aligned (transitive)	38	left	frontal	0.474367
-0.6	alpha	Aligned (transitive)	38	left	central	0.140377
-0.6	alpha	Aligned (transitive)	38	left	posterior	-0.0924196
-0.6	alpha	Aligned (transitive)	38	mid	frontal	-0.250802
-0.6	alpha	Aligned (transitive)	38	mid	central	-0.162115
-0.6	alpha	Aligned (transitive)	38	mid	posterior	-0.136277
-0.6	alpha	Aligned (transitive)	38	right	frontal	-0.035114
-0.6	alpha	Aligned (transitive)	38	right	central	-0.00213812
-0.6	alpha	Aligned (transitive)	38	right	posterior	-0.276757
-0.6	alpha	Aligned (transitive)	4	left	frontal	0.303792
-0.6	alpha	Aligned (transitive)	4	left	central	-0.918356
-0.6	alpha	Aligned (transitive)	4	left	posterior	-0.901657
-0.6	alpha	Aligned (transitive)	4	mid	frontal	0.163916
-0.6	alpha	Aligned (transitive)	4	mid	central	-0.596387
-0.6	alpha	Aligned (transitive)	4	mid	posterior	-0.561409
-0.6	alpha	Aligned (transitive)	4	right	frontal	0.372921
-0.6	alpha	Aligned (transitive)	4	right	central	-0.174735
-0.6	alpha	Aligned (transitive)	4	right	posterior	-0.0901435
-0.6	alpha	Aligned (transitive)	40	left	frontal	0.0767453
-0.6	alpha	Aligned (transitive)	40	left	central	-0.619222
-0.6	alpha	Aligned (transitive)	40	left	posterior	-0.847456
-0.6	alpha	Aligned (transitive)	40	mid	frontal	-0.232512
-0.6	alpha	Aligned (transitive)	40	mid	central	-0.564223
-0.6	alpha	Aligned (transitive)	40	mid	posterior	-0.667004
-0.6	alpha	Aligned (transitive)	40	right	frontal	0.0529139
-0.6	alpha	Aligned (transitive)	40	right	central	0.221552
-0.6	alpha	Aligned (transitive)	40	right	posterior	-0.0174251
-0.6	alpha	Aligned (transitive)	42	left	frontal	-0.320923
-0.6	alpha	Aligned (transitive)	42	left	central	-0.0741202
-0.6	alpha	Aligned (transitive)	42	left	posterior	0.0256943
-0.6	alpha	Aligned (transitive)	42	mid	frontal	-1.02978
-0.6	alpha	Aligned (transitive)	42	mid	central	-0.0648627
-0.6	alpha	Aligned (transitive)	42	mid	posterior	-0.0209209
-0.6	alpha	Aligned (transitive)	42	right	frontal	-0.630975
-0.6	alpha	Aligned (transitive)	42	right	central	-0.638172
-0.6	alpha	Aligned (transitive)	42	right	posterior	-0.165102
-0.6	alpha	Aligned (transitive)	44	left	frontal	-0.669915
-0.6	alpha	Aligned (transitive)	44	left	central	-0.611293
-0.6	alpha	Aligned (transitive)	44	left	posterior	0.194341
-0.6	alpha	Aligned (transitive)	44	mid	frontal	-0.0835064
-0.6	alpha	Aligned (transitive)	44	mid	central	-0.270738
-0.6	alpha	Aligned (transitive)	44	mid	posterior	-0.0414444
-0.6	alpha	Aligned (transitive)	44	right	frontal	-0.188599
-0.6	alpha	Aligned (transitive)	44	right	central	-0.154853
-0.6	alpha	Aligned (transitive)	44	right	posterior	-0.252617
-0.6	alpha	Aligned (transitive)	46	left	frontal	-0.665474
-0.6	alpha	Aligned (transitive)	46	left	central	0.0270226
-0.6	alpha	Aligned (transitive)	46	left	posterior	0.1839
-0.6	alpha	Aligned (transitive)	46	mid	frontal	-0.655412
-0.6	alpha	Aligned (transitive)	46	mid	central	-0.343654
-0.6	alpha	Aligned (transitive)	46	mid	posterior	-0.0338647
-0.6	alpha	Aligned (transitive)	46	right	frontal	-0.450787
-0.6	alpha	Aligned (transitive)	46	right	central	-0.322314
-0.6	alpha	Aligned (transitive)	46	right	posterior	-0.0688646
-0.6	alpha	Aligned (transitive)	48	left	frontal	-0.514911
-0.6	alpha	Aligned (transitive)	48	left	central	-0.0629006
-0.6	alpha	Aligned (transitive)	48	left	posterior	-0.0034982
-0.6	alpha	Aligned (transitive)	48	mid	frontal	-0.353936
-0.6	alpha	Aligned (transitive)	48	mid	central	-0.435542
-0.6	alpha	Aligned (transitive)	48	mid	posterior	0.135343
-0.6	alpha	Aligned (transitive)	48	right	frontal	-0.252061
-0.6	alpha	Aligned (transitive)	48	right	central	0.0948439
-0.6	alpha	Aligned (transitive)	48	right	posterior	0.345182
-0.6	alpha	Aligned (transitive)	50	left	frontal	0.451319
-0.6	alpha	Aligned (transitive)	50	left	central	-0.0248578
-0.6	alpha	Aligned (transitive)	50	left	posterior	0.315957
-0.6	alpha	Aligned (transitive)	50	mid	frontal	-0.35659
-0.6	alpha	Aligned (transitive)	50	mid	central	0.284448
-0.6	alpha	Aligned (transitive)	50	mid	posterior	0.195375
-0.6	alpha	Aligned (transitive)	50	right	frontal	-0.0727297
-0.6	alpha	Aligned (transitive)	50	right	central	-0.247447
-0.6	alpha	Aligned (transitive)	50	right	posterior	-0.154157
-0.6	alpha	Aligned (transitive)	6	left	frontal	-0.0778828
-0.6	alpha	Aligned (transitive)	6	left	central	0.00541313
-0.6	alpha	Aligned (transitive)	6	left	posterior	0.551333
-0.6	alpha	Aligned (transitive)	6	mid	frontal	-0.188574
-0.6	alpha	Aligned (transitive)	6	mid	central	-0.636784
-0.6	alpha	Aligned (transitive)	6	mid	posterior	-0.759314
-0.6	alpha	Aligned (transitive)	6	right	frontal	-0.680631
-0.6	alpha	Aligned (transitive)	6	right	central	-0.962675
-0.6	alpha	Aligned (transitive)	6	right	posterior	-0.492723
-0.6	alpha	Aligned (transitive)	8	left	frontal	-0.335868
-0.6	alpha	Aligned (transitive)	8	left	central	0.173772
-0.6	alpha	Aligned (transitive)	8	left	posterior	0.926153
-0.6	alpha	Aligned (transitive)	8	mid	frontal	-0.196556
-0.6	alpha	Aligned (transitive)	8	mid	central	-0.108822
-0.6	alpha	Aligned (transitive)	8	mid	posterior	0.509532
-0.6	alpha	Aligned (transitive)	8	right	frontal	0.43702
-0.6	alpha	Aligned (transitive)	8	right	central	-0.42941
-0.6	alpha	Aligned (transitive)	8	right	posterior	0.0720925
-0.6	alpha	Non-aligned (transitive)	1	left	frontal	0.0632438
-0.6	alpha	Non-aligned (transitive)	1	left	central	0.168075
-0.6	alpha	Non-aligned (transitive)	1	left	posterior	0.344904
-0.6	alpha	Non-aligned (transitive)	1	mid	frontal	-0.370771
-0.6	alpha	Non-aligned (transitive)	1	mid	central	-0.144698
-0.6	alpha	Non-aligned (transitive)	1	mid	posterior	0.216072
-0.6	alpha	Non-aligned (transitive)	1	right	frontal	-0.579567
-0.6	alpha	Non-aligned (transitive)	1	right	central	-0.855969
-0.6	alpha	Non-aligned (transitive)	1	right	posterior	-0.665134
-0.6	alpha	Non-aligned (transitive)	11	left	frontal	-0.653454
-0.6	alpha	Non-aligned (transitive)	11	left	central	-1.25454
-0.6	alpha	Non-aligned (transitive)	11	left	posterior	-0.936384
-0.6	alpha	Non-aligned (transitive)	11	mid	frontal	-0.255887
-0.6	alpha	Non-aligned (transitive)	11	mid	central	-1.16864
-0.6	alpha	Non-aligned (transitive)	11	mid	posterior	-1.09315
-0.6	alpha	Non-aligned (transitive)	11	right	frontal	-0.688706
-0.6	alpha	Non-aligned (transitive)	11	right	central	-0.963597
-0.6	alpha	Non-aligned (transitive)	11	right	posterior	-0.795684
-0.6	alpha	Non-aligned (transitive)	13	left	frontal	-0.187505
-0.6	alpha	Non-aligned (transitive)	13	left	central	-0.104709
-0.6	alpha	Non-aligned (transitive)	13	left	posterior	0.138411
-0.6	alpha	Non-aligned (transitive)	13	mid	frontal	-0.15197
-0.6	alpha	Non-aligned (transitive)	13	mid	central	0.499595
-0.6	alpha	Non-aligned (transitive)	13	mid	posterior	0.498645
-0.6	alpha	Non-aligned (transitive)	13	right	frontal	0.0955511
-0.6	alpha	Non-aligned (transitive)	13	right	central	-0.359967
-0.6	alpha	Non-aligned (transitive)	13	right	posterior	-0.00556645
-0.6	alpha	Non-aligned (transitive)	15	left	frontal	0.075006
-0.6	alpha	Non-aligned (transitive)	15	left	central	-0.0223114
-0.6	alpha	Non-aligned (transitive)	15	left	posterior	-0.252741
-0.6	alpha	Non-aligned (transitive)	15	mid	frontal	0.259719
-0.6	alpha	Non-aligned (transitive)	15	mid	central	0.332345
-0.6	alpha	Non-aligned (transitive)	15	mid	posterior	0.10117
-0.6	alpha	Non-aligned (transitive)	15	right	frontal	0.650257
-0.6	alpha	Non-aligned (transitive)	15	right	central	-0.399808
-0.6	alpha	Non-aligned (transitive)	15	right	posterior	-0.305814
-0.6	alpha	Non-aligned (transitive)	17	left	frontal	-0.294061
-0.6	alpha	Non-aligned (transitive)	17	left	central	0.299431
-0.6	alpha	Non-aligned (transitive)	17	left	posterior	0.0341146
-0.6	alpha	Non-aligned (transitive)	17	mid	frontal	-0.442112
-0.6	alpha	Non-aligned (transitive)	17	mid	central	0.0975678
-0.6	alpha	Non-aligned (transitive)	17	mid	posterior	-0.799612
-0.6	alpha	Non-aligned (transitive)	17	right	frontal	-0.250816
-0.6	alpha	Non-aligned (transitive)	17	right	central	0.388996
-0.6	alpha	Non-aligned (transitive)	17	right	posterior	-0.0721381
-0.6	alpha	Non-aligned (transitive)	19	left	frontal	-0.0134369
-0.6	alpha	Non-aligned (transitive)	19	left	central	0.108667
-0.6	alpha	Non-aligned (transitive)	19	left	posterior	0.534328
-0.6	alpha	Non-aligned (transitive)	19	mid	frontal	-0.548891
-0.6	alpha	Non-aligned (transitive)	19	mid	central	-0.849997
-0.6	alpha	Non-aligned (transitive)	19	mid	posterior	-0.152208
-0.6	alpha	Non-aligned (transitive)	19	right	frontal	-0.560885
-0.6	alpha	Non-aligned (transitive)	19	right	central	-0.759287
-0.6	alpha	Non-aligned (transitive)	19	right	posterior	-0.832175
-0.6	alpha	Non-aligned (transitive)	21	left	frontal	-0.234184
-0.6	alpha	Non-aligned (transitive)	21	left	central	0.255459
-0.6	alpha	Non-aligned (transitive)	21	left	posterior	-0.430438
-0.6	alpha	Non-aligned (transitive)	21	mid	frontal	-0.18521
-0.6	alpha	Non-aligned (transitive)	21	mid	central	0.509315
-0.6	alpha	Non-aligned (transitive)	21	mid	posterior	0.371474
-0.6	alpha	Non-aligned (transitive)	21	right	frontal	-0.146968
-0.6	alpha	Non-aligned (transitive)	21	right	central	0.311857
-0.6	alpha	Non-aligned (transitive)	21	right	posterior	0.0361834
-0.6	alpha	Non-aligned (transitive)	23	left	frontal	0.471393
-0.6	alpha	Non-aligned (transitive)	23	left	central	0.294027
-0.6	alpha	Non-aligned (transitive)	23	left	posterior	-0.27903
-0.6	alpha	Non-aligned (transitive)	23	mid	frontal	0.109837
-0.6	alpha	Non-aligned (transitive)	23	mid	central	0.260489
-0.6	alpha	Non-aligned (transitive)	23	mid	posterior	0.279611
-0.6	alpha	Non-aligned (transitive)	23	right	frontal	0.493142
-0.6	alpha	Non-aligned (transitive)	23	right	central	0.25411
-0.6	alpha	Non-aligned (transitive)	23	right	posterior	0.588954
-0.6	alpha	Non-aligned (transitive)	24	left	frontal	-0.636581
-0.6	alpha	Non-aligned (transitive)	24	left	central	1.19074
-0.6	alpha	Non-aligned (transitive)	24	left	posterior	0.428389
-0.6	alpha	Non-aligned (transitive)	24	mid	frontal	-1.93138
-0.6	alpha	Non-aligned (transitive)	24	mid	central	0.362766
-0.6	alpha	Non-aligned (transitive)	24	mid	posterior	1.80346
-0.6	alpha	Non-aligned (transitive)	24	right	frontal	-0.234763
-0.6	alpha	Non-aligned (transitive)	24	right	central	1.74619
-0.6	alpha	Non-aligned (transitive)	24	right	posterior	0.936874
-0.6	alpha	Non-aligned (transitive)	25	left	frontal	-0.310321
-0.6	alpha	Non-aligned (transitive)	25	left	central	-0.183832
-0.6	alpha	Non-aligned (transitive)	25	left	posterior	-0.629228
-0.6	alpha	Non-aligned (transitive)	25	mid	frontal	-0.725802
-0.6	alpha	Non-aligned (transitive)	25	mid	central	-0.248977
-0.6	alpha	Non-aligned (transitive)	25	mid	posterior	0.138332
-0.6	alpha	Non-aligned (transitive)	25	right	frontal	-0.381317
-0.6	alpha	Non-aligned (transitive)	25	right	central	0.151417
-0.6	alpha	Non-aligned (transitive)	25	right	posterior	-0.149674
-0.6	alpha	Non-aligned (transitive)	27	left	frontal	0.473709
-0.6	alpha	Non-aligned (transitive)	27	left	central	0.856297
-0.6	alpha	Non-aligned (transitive)	27	left	posterior	2.41027
-0.6	alpha	Non-aligned (transitive)	27	mid	frontal	0.5262
-0.6	alpha	Non-aligned (transitive)	27	mid	central	1.32725
-0.6	alpha	Non-aligned (transitive)	27	mid	posterior	1.93366
-0.6	alpha	Non-aligned (transitive)	27	right	frontal	0.708121
-0.6	alpha	Non-aligned (transitive)	27	right	central	1.30924
-0.6	alpha	Non-aligned (transitive)	27	right	posterior	1.83519
-0.6	alpha	Non-aligned (transitive)	29	left	frontal	0.407478
-0.6	alpha	Non-aligned (transitive)	29	left	central	0.492286
-0.6	alpha	Non-aligned (transitive)	29	left	posterior	-0.159519
-0.6	alpha	Non-aligned (transitive)	29	mid	frontal	0.792217
-0.6	alpha	Non-aligned (transitive)	29	mid	central	0.751391
-0.6	alpha	Non-aligned (transitive)	29	mid	posterior	-0.461157
-0.6	alpha	Non-aligned (transitive)	29	right	frontal	1.08795
-0.6	alpha	Non-aligned (transitive)	29	right	central	1.00768
-0.6	alpha	Non-aligned (transitive)	29	right	posterior	-0.279254
-0.6	alpha	Non-aligned (transitive)	3	left	frontal	-0.302955
-0.6	alpha	Non-aligned (transitive)	3	left	central	-0.447377
-0.6	alpha	Non-aligned (transitive)	3	left	posterior	-0.271099
-0.6	alpha	Non-aligned (transitive)	3	mid	frontal	-0.603793
-0.6	alpha	Non-aligned (transitive)	3	mid	central	-0.491908
-0.6	alpha	Non-aligned (transitive)	3	mid	posterior	0.249015
-0.6	alpha	Non-aligned (transitive)	3	right	frontal	-0.359823
-0.6	alpha	Non-aligned (transitive)	3	right	central	-0.528232
-0.6	alpha	Non-aligned (transitive)	3	right	posterior	0.0793474
-0.6	alpha	Non-aligned (transitive)	31	left	frontal	0.452459
-0.6	alpha	Non-aligned (transitive)	31	left	central	0.540968
-0.6	alpha	Non-aligned (transitive)	31	left	posterior	-0.964935
-0.6	alpha	Non-aligned (transitive)	31	mid	frontal	1.29252
-0.6	alpha	Non-aligned (transitive)	31	mid	central	1.46477
-0.6	alpha	Non-aligned (transitive)	31	mid	posterior	0.127091
-0.6	alpha	Non-aligned (transitive)	31	right	frontal	3.04901
-0.6	alpha	Non-aligned (transitive)	31	right	central	1.98975
-0.6	alpha	Non-aligned (transitive)	31	right	posterior	-0.0254675
-0.6	alpha	Non-aligned (transitive)	33	left	frontal	0.0997664
-0.6	alpha	Non-aligned (transitive)	33	left	central	0.54635
-0.6	alpha	Non-aligned (transitive)	33	left	posterior	0.233623
-0.6	alpha	Non-aligned (transitive)	33	mid	frontal	-0.125539
-0.6	alpha	Non-aligned (transitive)	33	mid	central	0.550126
-0.6	alpha	Non-aligned (transitive)	33	mid	posterior	0.452213
-0.6	alpha	Non-aligned (transitive)	33	right	frontal	-0.349666
-0.6	alpha	Non-aligned (transitive)	33	right	central	-0.0649009
-0.6	alpha	Non-aligned (transitive)	33	right	posterior	0.0488634
-0.6	alpha	Non-aligned (transitive)	35	left	frontal	-0.257423
-0.6	alpha	Non-aligned (transitive)	35	left	central	-0.381043
-0.6	alpha	Non-aligned (transitive)	35	left	posterior	-0.124031
-0.6	alpha	Non-aligned (transitive)	35	mid	frontal	-0.405545
-0.6	alpha	Non-aligned (transitive)	35	mid	central	-0.445254
-0.6	alpha	Non-aligned (transitive)	35	mid	posterior	-0.000291323
-0.6	alpha	Non-aligned (transitive)	35	right	frontal	-0.474267
-0.6	alpha	Non-aligned (transitive)	35	right	central	-0.556508
-0.6	alpha	Non-aligned (transitive)	35	right	posterior	-0.263392
-0.6	alpha	Non-aligned (transitive)	37	left	frontal	1.22224
-0.6	alpha	Non-aligned (transitive)	37	left	central	1.18321
-0.6	alpha	Non-aligned (transitive)	37	left	posterior	1.304
-0.6	alpha	Non-aligned (transitive)	37	mid	frontal	1.30244
-0.6	alpha	Non-aligned (transitive)	37	mid	central	1.86138
-0.6	alpha	Non-aligned (transitive)	37	mid	posterior	1.30111
-0.6	alpha	Non-aligned (transitive)	37	right	frontal	1.42141
-0.6	alpha	Non-aligned (transitive)	37	right	central	2.37347
-0.6	alpha	Non-aligned (transitive)	37	right	posterior	2.33965
-0.6	alpha	Non-aligned (transitive)	39	left	frontal	0.159134
-0.6	alpha	Non-aligned (transitive)	39	left	central	0.244042
-0.6	alpha	Non-aligned (transitive)	39	left	posterior	0.0981988
-0.6	alpha	Non-aligned (transitive)	39	mid	frontal	-0.0523457
-0.6	alpha	Non-aligned (transitive)	39	mid	central	0.526746
-0.6	alpha	Non-aligned (transitive)	39	mid	posterior	0.246782
-0.6	alpha	Non-aligned (transitive)	39	right	frontal	0.158611
-0.6	alpha	Non-aligned (transitive)	39	right	central	0.543571
-0.6	alpha	Non-aligned (transitive)	39	right	posterior	0.286455
-0.6	alpha	Non-aligned (transitive)	4	left	frontal	2.64126
-0.6	alpha	Non-aligned (transitive)	4	left	central	5.83696
-0.6	alpha	Non-aligned (transitive)	4	left	posterior	3.33119
-0.6	alpha	Non-aligned (transitive)	4	mid	frontal	2.69616
-0.6	alpha	Non-aligned (transitive)	4	mid	central	4.2034
-0.6	alpha	Non-aligned (transitive)	4	mid	posterior	1.81009
-0.6	alpha	Non-aligned (transitive)	4	right	frontal	2.38275
-0.6	alpha	Non-aligned (transitive)	4	right	central	4.32989
-0.6	alpha	Non-aligned (transitive)	4	right	posterior	6.13127
-0.6	alpha	Non-aligned (transitive)	41	left	frontal	-0.283137
-0.6	alpha	Non-aligned (transitive)	41	left	central	-0.194331
-0.6	alpha	Non-aligned (transitive)	41	left	posterior	0.771711
-0.6	alpha	Non-aligned (transitive)	41	mid	frontal	-0.869259
-0.6	alpha	Non-aligned (transitive)	41	mid	central	-0.273414
-0.6	alpha	Non-aligned (transitive)	41	mid	posterior	-0.167003
-0.6	alpha	Non-aligned (transitive)	41	right	frontal	-0.645832
-0.6	alpha	Non-aligned (transitive)	41	right	central	0.197637
-0.6	alpha	Non-aligned (transitive)	41	right	posterior	-0.0265481
-0.6	alpha	Non-aligned (transitive)	43	left	frontal	-0.255218
-0.6	alpha	Non-aligned (transitive)	43	left	central	-0.189875
-0.6	alpha	Non-aligned (transitive)	43	left	posterior	-0.196574
-0.6	alpha	Non-aligned (transitive)	43	mid	frontal	0.292569
-0.6	alpha	Non-aligned (transitive)	43	mid	central	0.232684
-0.6	alpha	Non-aligned (transitive)	43	mid	posterior	0.024433
-0.6	alpha	Non-aligned (transitive)	43	right	frontal	0.516352
-0.6	alpha	Non-aligned (transitive)	43	right	central	0.154843
-0.6	alpha	Non-aligned (transitive)	43	right	posterior	0.178898
-0.6	alpha	Non-aligned (transitive)	45	left	frontal	-0.337966
-0.6	alpha	Non-aligned (transitive)	45	left	central	-0.233883
-0.6	alpha	Non-aligned (transitive)	45	left	posterior	0.388556
-0.6	alpha	Non-aligned (transitive)	45	mid	frontal	-0.0324484
-0.6	alpha	Non-aligned (transitive)	45	mid	central	-0.367512
-0.6	alpha	Non-aligned (transitive)	45	mid	posterior	0.597936
-0.6	alpha	Non-aligned (transitive)	45	right	frontal	-0.131702
-0.6	alpha	Non-aligned (transitive)	45	right	central	-0.406807
-0.6	alpha	Non-aligned (transitive)	45	right	posterior	-0.154886
-0.6	alpha	Non-aligned (transitive)	47	left	frontal	-1.67969
-0.6	alpha	Non-aligned (transitive)	47	left	central	-1.71868
-0.6	alpha	Non-aligned (transitive)	47	left	posterior	-2.09739
-0.6	alpha	Non-aligned (transitive)	47	mid	frontal	-2.28469
-0.6	alpha	Non-aligned (transitive)	47	mid	central	-2.3636
-0.6	alpha	Non-aligned (transitive)	47	mid	posterior	-2.53266
-0.6	alpha	Non-aligned (transitive)	47	right	frontal	-1.56019
-0.6	alpha	Non-aligned (transitive)	47	right	central	-0.819981
-0.6	alpha	Non-aligned (transitive)	47	right	posterior	-1.40301
-0.6	alpha	Non-aligned (transitive)	49	left	frontal	0.355581
-0.6	alpha	Non-aligned (transitive)	49	left	central	0.358389
-0.6	alpha	Non-aligned (transitive)	49	left	posterior	0.151336
-0.6	alpha	Non-aligned (transitive)	49	mid	frontal	0.214844
-0.6	alpha	Non-aligned (transitive)	49	mid	central	0.50911
-0.6	alpha	Non-aligned (transitive)	49	mid	posterior	0.397584
-0.6	alpha	Non-aligned (transitive)	49	right	frontal	0.489833
-0.6	alpha	Non-aligned (transitive)	49	right	central	0.35301
-0.6	alpha	Non-aligned (transitive)	49	right	posterior	-0.0185714
-0.6	alpha	Non-aligned (transitive)	5	left	frontal	0.255238
-0.6	alpha	Non-aligned (transitive)	5	left	central	-0.0446076
-0.6	alpha	Non-aligned (transitive)	5	left	posterior	0.16075
-0.6	alpha	Non-aligned (transitive)	5	mid	frontal	-0.465874
-0.6	alpha	Non-aligned (transitive)	5	mid	central	-0.715329
-0.6	alpha	Non-aligned (transitive)	5	mid	posterior	0.181487
-0.6	alpha	Non-aligned (transitive)	5	right	frontal	-0.790794
-0.6	alpha	Non-aligned (transitive)	5	right	central	-0.849478
-0.6	alpha	Non-aligned (transitive)	5	right	posterior	-0.21648
-0.6	alpha	Non-aligned (transitive)	7	left	frontal	-0.0739224
-0.6	alpha	Non-aligned (transitive)	7	left	central	-0.102556
-0.6	alpha	Non-aligned (transitive)	7	left	posterior	-0.810666
-0.6	alpha	Non-aligned (transitive)	7	mid	frontal	0.275586
-0.6	alpha	Non-aligned (transitive)	7	mid	central	-0.547576
-0.6	alpha	Non-aligned (transitive)	7	mid	posterior	-0.339133
-0.6	alpha	Non-aligned (transitive)	7	right	frontal	0.284981
-0.6	alpha	Non-aligned (transitive)	7	right	central	-0.922044
-0.6	alpha	Non-aligned (transitive)	7	right	posterior	0.0626777
-0.6	alpha	Non-aligned (transitive)	8	left	frontal	-1.069
-0.6	alpha	Non-aligned (transitive)	8	left	central	-0.595736
-0.6	alpha	Non-aligned (transitive)	8	left	posterior	-1.15312
-0.6	alpha	Non-aligned (transitive)	8	mid	frontal	-0.94414
-0.6	alpha	Non-aligned (transitive)	8	mid	central	-0.147237
-0.6	alpha	Non-aligned (transitive)	8	mid	posterior	-0.461876
-0.6	alpha	Non-aligned (transitive)	8	right	frontal	-0.794855
-0.6	alpha	Non-aligned (transitive)	8	right	central	-0.0805431
-0.6	alpha	Non-aligned (transitive)	8	right	posterior	-0.812309
-0.6	alpha	Non-aligned (transitive)	9	left	frontal	-1.08055
-0.6	alpha	Non-aligned (transitive)	9	left	central	-0.606158
-0.6	alpha	Non-aligned (transitive)	9	left	posterior	0.0759294
-0.6	alpha	Non-aligned (transitive)	9	mid	frontal	0.286456
-0.6	alpha	Non-aligned (transitive)	9	mid	central	-1.071
-0.6	alpha	Non-aligned (transitive)	9	mid	posterior	0.166135
-0.6	alpha	Non-aligned (transitive)	9	right	frontal	0.714876
-0.6	alpha	Non-aligned (transitive)	9	right	central	-0.0135817
-0.6	alpha	Non-aligned (transitive)	9	right	posterior	0.357872
-0.6	alpha	Aligned (intransitive)	10	left	frontal	-1.02764
-0.6	alpha	Aligned (intransitive)	10	left	central	-0.906711
-0.6	alpha	Aligned (intransitive)	10	left	posterior	-0.33532
-0.6	alpha	Aligned (intransitive)	10	mid	frontal	-0.751712
-0.6	alpha	Aligned (intransitive)	10	mid	central	-0.723624
-0.6	alpha	Aligned (intransitive)	10	mid	posterior	-0.582487
-0.6	alpha	Aligned (intransitive)	10	right	frontal	-0.813939
-0.6	alpha	Aligned (intransitive)	10	right	central	-1.27191
-0.6	alpha	Aligned (intransitive)	10	right	posterior	-0.485247
-0.6	alpha	Aligned (intransitive)	12	left	frontal	0.28128
-0.6	alpha	Aligned (intransitive)	12	left	central	0.29149
-0.6	alpha	Aligned (intransitive)	12	left	posterior	0.618661
-0.6	alpha	Aligned (intransitive)	12	mid	frontal	-0.213762
-0.6	alpha	Aligned (intransitive)	12	mid	central	0.0328562
-0.6	alpha	Aligned (intransitive)	12	mid	posterior	0.266692
-0.6	alpha	Aligned (intransitive)	12	right	frontal	-0.343102
-0.6	alpha	Aligned (intransitive)	12	right	central	0.0121926
-0.6	alpha	Aligned (intransitive)	12	right	posterior	-0.129173
-0.6	alpha	Aligned (intransitive)	14	left	frontal	0.234116
-0.6	alpha	Aligned (intransitive)	14	left	central	0.44738
-0.6	alpha	Aligned (intransitive)	14	left	posterior	0.686077
-0.6	alpha	Aligned (intransitive)	14	mid	frontal	0.327431
-0.6	alpha	Aligned (intransitive)	14	mid	central	0.502655
-0.6	alpha	Aligned (intransitive)	14	mid	posterior	0.299562
-0.6	alpha	Aligned (intransitive)	14	right	frontal	0.58247
-0.6	alpha	Aligned (intransitive)	14	right	central	0.93654
-0.6	alpha	Aligned (intransitive)	14	right	posterior	0.521504
-0.6	alpha	Aligned (intransitive)	16	left	frontal	-0.633893
-0.6	alpha	Aligned (intransitive)	16	left	central	-1.09701
-0.6	alpha	Aligned (intransitive)	16	left	posterior	-0.476785
-0.6	alpha	Aligned (intransitive)	16	mid	frontal	-0.622849
-0.6	alpha	Aligned (intransitive)	16	mid	central	-0.468172
-0.6	alpha	Aligned (intransitive)	16	mid	posterior	-1.09763
-0.6	alpha	Aligned (intransitive)	16	right	frontal	-0.798441
-0.6	alpha	Aligned (intransitive)	16	right	central	-0.865826
-0.6	alpha	Aligned (intransitive)	16	right	posterior	-0.949925
-0.6	alpha	Aligned (intransitive)	18	left	frontal	0.290632
-0.6	alpha	Aligned (intransitive)	18	left	central	0.175684
-0.6	alpha	Aligned (intransitive)	18	left	posterior	0.61716
-0.6	alpha	Aligned (intransitive)	18	mid	frontal	-0.409065
-0.6	alpha	Aligned (intransitive)	18	mid	central	0.799041
-0.6	alpha	Aligned (intransitive)	18	mid	posterior	1.301
-0.6	alpha	Aligned (intransitive)	18	right	frontal	-0.0684354
-0.6	alpha	Aligned (intransitive)	18	right	central	0.297015
-0.6	alpha	Aligned (intransitive)	18	right	posterior	0.725836
-0.6	alpha	Aligned (intransitive)	2	left	frontal	0.338224
-0.6	alpha	Aligned (intransitive)	2	left	central	0.166964
-0.6	alpha	Aligned (intransitive)	2	left	posterior	-0.0430473
-0.6	alpha	Aligned (intransitive)	2	mid	frontal	-0.241434
-0.6	alpha	Aligned (intransitive)	2	mid	central	-0.529719
-0.6	alpha	Aligned (intransitive)	2	mid	posterior	0.107942
-0.6	alpha	Aligned (intransitive)	2	right	frontal	-0.152007
-0.6	alpha	Aligned (intransitive)	2	right	central	-0.572635
-0.6	alpha	Aligned (intransitive)	2	right	posterior	0.384083
-0.6	alpha	Aligned (intransitive)	20	left	frontal	0.516927
-0.6	alpha	Aligned (intransitive)	20	left	central	-0.467137
-0.6	alpha	Aligned (intransitive)	20	left	posterior	-0.118728
-0.6	alpha	Aligned (intransitive)	20	mid	frontal	-0.481515
-0.6	alpha	Aligned (intransitive)	20	mid	central	-0.3422
-0.6	alpha	Aligned (intransitive)	20	mid	posterior	0.611635
-0.6	alpha	Aligned (intransitive)	20	right	frontal	-1.0413
-0.6	alpha	Aligned (intransitive)	20	right	central	-0.856167
-0.6	alpha	Aligned (intransitive)	20	right	posterior	-0.175815
-0.6	alpha	Aligned (intransitive)	22	left	frontal	-0.84801
-0.6	alpha	Aligned (intransitive)	22	left	central	-0.135865
-0.6	alpha	Aligned (intransitive)	22	left	posterior	0.231089
-0.6	alpha	Aligned (intransitive)	22	mid	frontal	-0.765358
-0.6	alpha	Aligned (intransitive)	22	mid	central	-0.538585
-0.6	alpha	Aligned (intransitive)	22	mid	posterior	-0.28524
-0.6	alpha	Aligned (intransitive)	22	right	frontal	-0.612325
-0.6	alpha	Aligned (intransitive)	22	right	central	-0.53329
-0.6	alpha	Aligned (intransitive)	22	right	posterior	-0.117107
-0.6	alpha	Aligned (intransitive)	24	left	frontal	0.217804
-0.6	alpha	Aligned (intransitive)	24	left	central	-0.552838
-0.6	alpha	Aligned (intransitive)	24	left	posterior	-0.584
-0.6	alpha	Aligned (intransitive)	24	mid	frontal	0.971527
-0.6	alpha	Aligned (intransitive)	24	mid	central	-0.40246
-0.6	alpha	Aligned (intransitive)	24	mid	posterior	-0.0316245
-0.6	alpha	Aligned (intransitive)	24	right	frontal	-0.289913
-0.6	alpha	Aligned (intransitive)	24	right	central	-1.42802
-0.6	alpha	Aligned (intransitive)	24	right	posterior	-0.207959
-0.6	alpha	Aligned (intransitive)	26	left	frontal	-0.583156
-0.6	alpha	Aligned (intransitive)	26	left	central	-0.829155
-0.6	alpha	Aligned (intransitive)	26	left	posterior	0.327263
-0.6	alpha	Aligned (intransitive)	26	mid	frontal	-1.13697
-0.6	alpha	Aligned (intransitive)	26	mid	central	-0.967296
-0.6	alpha	Aligned (intransitive)	26	mid	posterior	0.221943
-0.6	alpha	Aligned (intransitive)	26	right	frontal	-0.874191
-0.6	alpha	Aligned (intransitive)	26	right	central	-0.772438
-0.6	alpha	Aligned (intransitive)	26	right	posterior	-0.482292
-0.6	alpha	Aligned (intransitive)	28	left	frontal	0.306229
-0.6	alpha	Aligned (intransitive)	28	left	central	0.779677
-0.6	alpha	Aligned (intransitive)	28	left	posterior	0.630824
-0.6	alpha	Aligned (intransitive)	28	mid	frontal	-0.211837
-0.6	alpha	Aligned (intransitive)	28	mid	central	0.109162
-0.6	alpha	Aligned (intransitive)	28	mid	posterior	0.0971282
-0.6	alpha	Aligned (intransitive)	28	right	frontal	0.0257163
-0.6	alpha	Aligned (intransitive)	28	right	central	0.809089
-0.6	alpha	Aligned (intransitive)	28	right	posterior	0.278991
-0.6	alpha	Aligned (intransitive)	30	left	frontal	-1.07879
-0.6	alpha	Aligned (intransitive)	30	left	central	-0.767998
-0.6	alpha	Aligned (intransitive)	30	left	posterior	-0.568368
-0.6	alpha	Aligned (intransitive)	30	mid	frontal	-1.07459
-0.6	alpha	Aligned (intransitive)	30	mid	central	-0.603271
-0.6	alpha	Aligned (intransitive)	30	mid	posterior	-0.222594
-0.6	alpha	Aligned (intransitive)	30	right	frontal	-0.598782
-0.6	alpha	Aligned (intransitive)	30	right	central	-0.0899888
-0.6	alpha	Aligned (intransitive)	30	right	posterior	0.00315438
-0.6	alpha	Aligned (intransitive)	32	left	frontal	0.235971
-0.6	alpha	Aligned (intransitive)	32	left	central	-0.412442
-0.6	alpha	Aligned (intransitive)	32	left	posterior	-0.67318
-0.6	alpha	Aligned (intransitive)	32	mid	frontal	-0.0979285
-0.6	alpha	Aligned (intransitive)	32	mid	central	-0.484152
-0.6	alpha	Aligned (intransitive)	32	mid	posterior	-0.345108
-0.6	alpha	Aligned (intransitive)	32	right	frontal	-0.847451
-0.6	alpha	Aligned (intransitive)	32	right	central	-0.447044
-0.6	alpha	Aligned (intransitive)	32	right	posterior	-0.854473
-0.6	alpha	Aligned (intransitive)	34	left	frontal	0.576772
-0.6	alpha	Aligned (intransitive)	34	left	central	0.75124
-0.6	alpha	Aligned (intransitive)	34	left	posterior	-0.168849
-0.6	alpha	Aligned (intransitive)	34	mid	frontal	-0.107636
-0.6	alpha	Aligned (intransitive)	34	mid	central	0.179931
-0.6	alpha	Aligned (intransitive)	34	mid	posterior	0.611868
-0.6	alpha	Aligned (intransitive)	34	right	frontal	-0.327167
-0.6	alpha	Aligned (intransitive)	34	right	central	-0.513824
-0.6	alpha	Aligned (intransitive)	34	right	posterior	-0.484775
-0.6	alpha	Aligned (intransitive)	36	left	frontal	-0.238857
-0.6	alpha	Aligned (intransitive)	36	left	central	-0.929667
-0.6	alpha	Aligned (intransitive)	36	left	posterior	-1.09117
-0.6	alpha	Aligned (intransitive)	36	mid	frontal	-0.343846
-0.6	alpha	Aligned (intransitive)	36	mid	central	-0.834279
-0.6	alpha	Aligned (intransitive)	36	mid	posterior	-0.768116
-0.6	alpha	Aligned (intransitive)	36	right	frontal	-0.380641
-0.6	alpha	Aligned (intransitive)	36	right	central	-0.856153
-0.6	alpha	Aligned (intransitive)	36	right	posterior	-1.1557
-0.6	alpha	Aligned (intransitive)	38	left	frontal	-0.249075
-0.6	alpha	Aligned (intransitive)	38	left	central	-0.640876
-0.6	alpha	Aligned (intransitive)	38	left	posterior	-0.545048
-0.6	alpha	Aligned (intransitive)	38	mid	frontal	0.110386
-0.6	alpha	Aligned (intransitive)	38	mid	central	-0.46693
-0.6	alpha	Aligned (intransitive)	38	mid	posterior	-0.489239
-0.6	alpha	Aligned (intransitive)	38	right	frontal	-0.0792485
-0.6	alpha	Aligned (intransitive)	38	right	central	-0.60811
-0.6	alpha	Aligned (intransitive)	38	right	posterior	-0.446968
-0.6	alpha	Aligned (intransitive)	4	left	frontal	0.710946
-0.6	alpha	Aligned (intransitive)	4	left	central	0.68707
-0.6	alpha	Aligned (intransitive)	4	left	posterior	0.921826
-0.6	alpha	Aligned (intransitive)	4	mid	frontal	-0.493137
-0.6	alpha	Aligned (intransitive)	4	mid	central	-0.153969
-0.6	alpha	Aligned (intransitive)	4	mid	posterior	0.0258549
-0.6	alpha	Aligned (intransitive)	4	right	frontal	-0.286621
-0.6	alpha	Aligned (intransitive)	4	right	central	0.321934
-0.6	alpha	Aligned (intransitive)	4	right	posterior	0.124738
-0.6	alpha	Aligned (intransitive)	40	left	frontal	-0.196001
-0.6	alpha	Aligned (intransitive)	40	left	central	-0.606299
-0.6	alpha	Aligned (intransitive)	40	left	posterior	-0.544021
-0.6	alpha	Aligned (intransitive)	40	mid	frontal	-0.273253
-0.6	alpha	Aligned (intransitive)	40	mid	central	-0.589342
-0.6	alpha	Aligned (intransitive)	40	mid	posterior	-0.603018
-0.6	alpha	Aligned (intransitive)	40	right	frontal	-0.516442
-0.6	alpha	Aligned (intransitive)	40	right	central	-1.07963
-0.6	alpha	Aligned (intransitive)	40	right	posterior	-1.09824
-0.6	alpha	Aligned (intransitive)	42	left	frontal	0.29205
-0.6	alpha	Aligned (intransitive)	42	left	central	-0.0534793
-0.6	alpha	Aligned (intransitive)	42	left	posterior	-0.126528
-0.6	alpha	Aligned (intransitive)	42	mid	frontal	-0.303989
-0.6	alpha	Aligned (intransitive)	42	mid	central	-0.0541506
-0.6	alpha	Aligned (intransitive)	42	mid	posterior	-0.132268
-0.6	alpha	Aligned (intransitive)	42	right	frontal	0.114115
-0.6	alpha	Aligned (intransitive)	42	right	central	-0.20077
-0.6	alpha	Aligned (intransitive)	42	right	posterior	-0.518744
-0.6	alpha	Aligned (intransitive)	44	left	frontal	0.0352656
-0.6	alpha	Aligned (intransitive)	44	left	central	0.146557
-0.6	alpha	Aligned (intransitive)	44	left	posterior	0.199333
-0.6	alpha	Aligned (intransitive)	44	mid	frontal	-0.164725
-0.6	alpha	Aligned (intransitive)	44	mid	central	-0.130355
-0.6	alpha	Aligned (intransitive)	44	mid	posterior	0.122312
-0.6	alpha	Aligned (intransitive)	44	right	frontal	-0.529016
-0.6	alpha	Aligned (intransitive)	44	right	central	-0.0241297
-0.6	alpha	Aligned (intransitive)	44	right	posterior	0.242574
-0.6	alpha	Aligned (intransitive)	46	left	frontal	0.618952
-0.6	alpha	Aligned (intransitive)	46	left	central	0.140017
-0.6	alpha	Aligned (intransitive)	46	left	posterior	-0.1452
-0.6	alpha	Aligned (intransitive)	46	mid	frontal	0.346837
-0.6	alpha	Aligned (intransitive)	46	mid	central	0.305779
-0.6	alpha	Aligned (intransitive)	46	mid	posterior	0.0946752
-0.6	alpha	Aligned (intransitive)	46	right	frontal	0.00814265
-0.6	alpha	Aligned (intransitive)	46	right	central	-0.195765
-0.6	alpha	Aligned (intransitive)	46	right	posterior	-0.0476065
-0.6	alpha	Aligned (intransitive)	48	left	frontal	-0.105222
-0.6	alpha	Aligned (intransitive)	48	left	central	-0.0550698
-0.6	alpha	Aligned (intransitive)	48	left	posterior	0.342136
-0.6	alpha	Aligned (intransitive)	48	mid	frontal	-0.0828166
-0.6	alpha	Aligned (intransitive)	48	mid	central	0.379914
-0.6	alpha	Aligned (intransitive)	48	mid	posterior	0.126607
-0.6	alpha	Aligned (intransitive)	48	right	frontal	-0.122833
-0.6	alpha	Aligned (intransitive)	48	right	central	0.327805
-0.6	alpha	Aligned (intransitive)	48	right	posterior	0.246039
-0.6	alpha	Aligned (intransitive)	50	left	frontal	-0.214081
-0.6	alpha	Aligned (intransitive)	50	left	central	-0.430403
-0.6	alpha	Aligned (intransitive)	50	left	posterior	-0.0619149
-0.6	alpha	Aligned (intransitive)	50	mid	frontal	0.245203
-0.6	alpha	Aligned (intransitive)	50	mid	central	0.037197
-0.6	alpha	Aligned (intransitive)	50	mid	posterior	0.378049
-0.6	alpha	Aligned (intransitive)	50	right	frontal	0.0405388
-0.6	alpha	Aligned (intransitive)	50	right	central	0.110976
-0.6	alpha	Aligned (intransitive)	50	right	posterior	0.751001
-0.6	alpha	Aligned (intransitive)	6	left	frontal	-0.33231
-0.6	alpha	Aligned (intransitive)	6	left	central	0.246065
-0.6	alpha	Aligned (intransitive)	6	left	posterior	0.869089
-0.6	alpha	Aligned (intransitive)	6	mid	frontal	-0.761946
-0.6	alpha	Aligned (intransitive)	6	mid	central	-0.519213
-0.6	alpha	Aligned (intransitive)	6	mid	posterior	-0.353657
-0.6	alpha	Aligned (intransitive)	6	right	frontal	-0.949449
-0.6	alpha	Aligned (intransitive)	6	right	central	-1.57693
-0.6	alpha	Aligned (intransitive)	6	right	posterior	-1.54139
-0.6	alpha	Aligned (intransitive)	8	left	frontal	0.0246015
-0.6	alpha	Aligned (intransitive)	8	left	central	0.474552
-0.6	alpha	Aligned (intransitive)	8	left	posterior	0.397408
-0.6	alpha	Aligned (intransitive)	8	mid	frontal	0.236985
-0.6	alpha	Aligned (intransitive)	8	mid	central	0.380168
-0.6	alpha	Aligned (intransitive)	8	mid	posterior	0.286585
-0.6	alpha	Aligned (intransitive)	8	right	frontal	0.368005
-0.6	alpha	Aligned (intransitive)	8	right	central	0.0599862
-0.6	alpha	Aligned (intransitive)	8	right	posterior	0.324744
-0.6	alpha	Non-aligned (intransitive)	1	left	frontal	0.187496
-0.6	alpha	Non-aligned (intransitive)	1	left	central	0.119075
-0.6	alpha	Non-aligned (intransitive)	1	left	posterior	0.383259
-0.6	alpha	Non-aligned (intransitive)	1	mid	frontal	0.0473084
-0.6	alpha	Non-aligned (intransitive)	1	mid	central	-0.659344
-0.6	alpha	Non-aligned (intransitive)	1	mid	posterior	-0.141929
-0.6	alpha	Non-aligned (intransitive)	1	right	frontal	-0.129382
-0.6	alpha	Non-aligned (intransitive)	1	right	central	-0.363777
-0.6	alpha	Non-aligned (intransitive)	1	right	posterior	-0.0786884
-0.6	alpha	Non-aligned (intransitive)	11	left	frontal	-1.23952
-0.6	alpha	Non-aligned (intransitive)	11	left	central	-0.985485
-0.6	alpha	Non-aligned (intransitive)	11	left	posterior	-0.614695
-0.6	alpha	Non-aligned (intransitive)	11	mid	frontal	-1.82004
-0.6	alpha	Non-aligned (intransitive)	11	mid	central	-1.49382
-0.6	alpha	Non-aligned (intransitive)	11	mid	posterior	-1.05877
-0.6	alpha	Non-aligned (intransitive)	11	right	frontal	-1.53048
-0.6	alpha	Non-aligned (intransitive)	11	right	central	-0.920451
-0.6	alpha	Non-aligned (intransitive)	11	right	posterior	-0.643287
-0.6	alpha	Non-aligned (intransitive)	13	left	frontal	-0.688607
-0.6	alpha	Non-aligned (intransitive)	13	left	central	-0.394125
-0.6	alpha	Non-aligned (intransitive)	13	left	posterior	0.101028
-0.6	alpha	Non-aligned (intransitive)	13	mid	frontal	-1.03934
-0.6	alpha	Non-aligned (intransitive)	13	mid	central	-0.472268
-0.6	alpha	Non-aligned (intransitive)	13	mid	posterior	0.527021
-0.6	alpha	Non-aligned (intransitive)	13	right	frontal	-0.52208
-0.6	alpha	Non-aligned (intransitive)	13	right	central	-0.16326
-0.6	alpha	Non-aligned (intransitive)	13	right	posterior	0.0356113
-0.6	alpha	Non-aligned (intransitive)	15	left	frontal	-0.909026
-0.6	alpha	Non-aligned (intransitive)	15	left	central	-0.208805
-0.6	alpha	Non-aligned (intransitive)	15	left	posterior	-1.18676
-0.6	alpha	Non-aligned (intransitive)	15	mid	frontal	-0.557059
-0.6	alpha	Non-aligned (intransitive)	15	mid	central	-0.239611
-0.6	alpha	Non-aligned (intransitive)	15	mid	posterior	-0.927472
-0.6	alpha	Non-aligned (intransitive)	15	right	frontal	-0.10636
-0.6	alpha	Non-aligned (intransitive)	15	right	central	-0.437541
-0.6	alpha	Non-aligned (intransitive)	15	right	posterior	-1.24104
-0.6	alpha	Non-aligned (intransitive)	17	left	frontal	0.0168247
-0.6	alpha	Non-aligned (intransitive)	17	left	central	0.134103
-0.6	alpha	Non-aligned (intransitive)	17	left	posterior	1.79554
-0.6	alpha	Non-aligned (intransitive)	17	mid	frontal	-0.232035
-0.6	alpha	Non-aligned (intransitive)	17	mid	central	0.272358
-0.6	alpha	Non-aligned (intransitive)	17	mid	posterior	1.20187
-0.6	alpha	Non-aligned (intransitive)	17	right	frontal	-0.653715
-0.6	alpha	Non-aligned (intransitive)	17	right	central	0.411192
-0.6	alpha	Non-aligned (intransitive)	17	right	posterior	0.62585
-0.6	alpha	Non-aligned (intransitive)	19	left	frontal	0.438283
-0.6	alpha	Non-aligned (intransitive)	19	left	central	0.327271
-0.6	alpha	Non-aligned (intransitive)	19	left	posterior	0.483994
-0.6	alpha	Non-aligned (intransitive)	19	mid	frontal	0.423489
-0.6	alpha	Non-aligned (intransitive)	19	mid	central	0.4498
-0.6	alpha	Non-aligned (intransitive)	19	mid	posterior	0.36505
-0.6	alpha	Non-aligned (intransitive)	19	right	frontal	0.0531353
-0.6	alpha	Non-aligned (intransitive)	19	right	central	-0.190637
-0.6	alpha	Non-aligned (intransitive)	19	right	posterior	0.02384
-0.6	alpha	Non-aligned (intransitive)	21	left	frontal	0.0541601
-0.6	alpha	Non-aligned (intransitive)	21	left	central	-0.351259
-0.6	alpha	Non-aligned (intransitive)	21	left	posterior	0.00853598
-0.6	alpha	Non-aligned (intransitive)	21	mid	frontal	-0.143013
-0.6	alpha	Non-aligned (intransitive)	21	mid	central	-0.279182
-0.6	alpha	Non-aligned (intransitive)	21	mid	posterior	0.0227594
-0.6	alpha	Non-aligned (intransitive)	21	right	frontal	0.344153
-0.6	alpha	Non-aligned (intransitive)	21	right	central	0.16819
-0.6	alpha	Non-aligned (intransitive)	21	right	posterior	0.188457
-0.6	alpha	Non-aligned (intransitive)	23	left	frontal	0.135028
-0.6	alpha	Non-aligned (intransitive)	23	left	central	0.114091
-0.6	alpha	Non-aligned (intransitive)	23	left	posterior	-1.11691
-0.6	alpha	Non-aligned (intransitive)	23	mid	frontal	-0.177661
-0.6	alpha	Non-aligned (intransitive)	23	mid	central	-0.179356
-0.6	alpha	Non-aligned (intransitive)	23	mid	posterior	-0.608231
-0.6	alpha	Non-aligned (intransitive)	23	right	frontal	0.780479
-0.6	alpha	Non-aligned (intransitive)	23	right	central	0.702334
-0.6	alpha	Non-aligned (intransitive)	23	right	posterior	0.254174
-0.6	alpha	Non-aligned (intransitive)	24	left	frontal	-0.976559
-0.6	alpha	Non-aligned (intransitive)	24	left	central	-0.2024
-0.6	alpha	Non-aligned (intransitive)	24	left	posterior	-0.422004
-0.6	alpha	Non-aligned (intransitive)	24	mid	frontal	-3.1786
-0.6	alpha	Non-aligned (intransitive)	24	mid	central	-4.80314
-0.6	alpha	Non-aligned (intransitive)	24	mid	posterior	-0.761771
-0.6	alpha	Non-aligned (intransitive)	24	right	frontal	-1.76059
-0.6	alpha	Non-aligned (intransitive)	24	right	central	1.38826
-0.6	alpha	Non-aligned (intransitive)	24	right	posterior	1.801
-0.6	alpha	Non-aligned (intransitive)	25	left	frontal	0.166546
-0.6	alpha	Non-aligned (intransitive)	25	left	central	-0.0464159
-0.6	alpha	Non-aligned (intransitive)	25	left	posterior	-0.410787
-0.6	alpha	Non-aligned (intransitive)	25	mid	frontal	-0.114467
-0.6	alpha	Non-aligned (intransitive)	25	mid	central	0.645641
-0.6	alpha	Non-aligned (intransitive)	25	mid	posterior	0.146647
-0.6	alpha	Non-aligned (intransitive)	25	right	frontal	0.318814
-0.6	alpha	Non-aligned (intransitive)	25	right	central	0.17893
-0.6	alpha	Non-aligned (intransitive)	25	right	posterior	0.0975673
-0.6	alpha	Non-aligned (intransitive)	27	left	frontal	0.511332
-0.6	alpha	Non-aligned (intransitive)	27	left	central	0.643274
-0.6	alpha	Non-aligned (intransitive)	27	left	posterior	1.13074
-0.6	alpha	Non-aligned (intransitive)	27	mid	frontal	-0.550653
-0.6	alpha	Non-aligned (intransitive)	27	mid	central	0.421287
-0.6	alpha	Non-aligned (intransitive)	27	mid	posterior	1.90749
-0.6	alpha	Non-aligned (intransitive)	27	right	frontal	0.24066
-0.6	alpha	Non-aligned (intransitive)	27	right	central	0.327986
-0.6	alpha	Non-aligned (intransitive)	27	right	posterior	1.36206
-0.6	alpha	Non-aligned (intransitive)	29	left	frontal	-0.0549432
-0.6	alpha	Non-aligned (intransitive)	29	left	central	0.266906
-0.6	alpha	Non-aligned (intransitive)	29	left	posterior	0.385599
-0.6	alpha	Non-aligned (intransitive)	29	mid	frontal	-0.160062
-0.6	alpha	Non-aligned (intransitive)	29	mid	central	0.140123
-0.6	alpha	Non-aligned (intransitive)	29	mid	posterior	0.0957013
-0.6	alpha	Non-aligned (intransitive)	29	right	frontal	0.668548
-0.6	alpha	Non-aligned (intransitive)	29	right	central	0.156668
-0.6	alpha	Non-aligned (intransitive)	29	right	posterior	-0.0121263
-0.6	alpha	Non-aligned (intransitive)	3	left	frontal	-0.772425
-0.6	alpha	Non-aligned (intransitive)	3	left	central	-0.398322
-0.6	alpha	Non-aligned (intransitive)	3	left	posterior	-0.022421
-0.6	alpha	Non-aligned (intransitive)	3	mid	frontal	0.137281
-0.6	alpha	Non-aligned (intransitive)	3	mid	central	0.0604715
-0.6	alpha	Non-aligned (intransitive)	3	mid	posterior	0.37855
-0.6	alpha	Non-aligned (intransitive)	3	right	frontal	0.509947
-0.6	alpha	Non-aligned (intransitive)	3	right	central	0.523193
-0.6	alpha	Non-aligned (intransitive)	3	right	posterior	0.380935
-0.6	alpha	Non-aligned (intransitive)	31	left	frontal	1.4434
-0.6	alpha	Non-aligned (intransitive)	31	left	central	0.747928
-0.6	alpha	Non-aligned (intransitive)	31	left	posterior	1.32895
-0.6	alpha	Non-aligned (intransitive)	31	mid	frontal	-0.0242387
-0.6	alpha	Non-aligned (intransitive)	31	mid	central	0.490673
-0.6	alpha	Non-aligned (intransitive)	31	mid	posterior	0.721031
-0.6	alpha	Non-aligned (intransitive)	31	right	frontal	0.733166
-0.6	alpha	Non-aligned (intransitive)	31	right	central	2.17296
-0.6	alpha	Non-aligned (intransitive)	31	right	posterior	0.426712
-0.6	alpha	Non-aligned (intransitive)	32	left	frontal	-3.39552
-0.6	alpha	Non-aligned (intransitive)	32	left	central	-1.273
-0.6	alpha	Non-aligned (intransitive)	32	left	posterior	1.4545
-0.6	alpha	Non-aligned (intransitive)	32	mid	frontal	-3.9361
-0.6	alpha	Non-aligned (intransitive)	32	mid	central	-1.94286
-0.6	alpha	Non-aligned (intransitive)	32	mid	posterior	-0.327988
-0.6	alpha	Non-aligned (intransitive)	32	right	frontal	-3.93477
-0.6	alpha	Non-aligned (intransitive)	32	right	central	-6.41312
-0.6	alpha	Non-aligned (intransitive)	32	right	posterior	-0.0245383
-0.6	alpha	Non-aligned (intransitive)	33	left	frontal	0.116283
-0.6	alpha	Non-aligned (intransitive)	33	left	central	0.412234
-0.6	alpha	Non-aligned (intransitive)	33	left	posterior	-0.0664574
-0.6	alpha	Non-aligned (intransitive)	33	mid	frontal	0.232023
-0.6	alpha	Non-aligned (intransitive)	33	mid	central	0.174824
-0.6	alpha	Non-aligned (intransitive)	33	mid	posterior	-0.922837
-0.6	alpha	Non-aligned (intransitive)	33	right	frontal	0.538739
-0.6	alpha	Non-aligned (intransitive)	33	right	central	-0.342941
-0.6	alpha	Non-aligned (intransitive)	33	right	posterior	-1.19299
-0.6	alpha	Non-aligned (intransitive)	35	left	frontal	0.254243
-0.6	alpha	Non-aligned (intransitive)	35	left	central	-0.0165988
-0.6	alpha	Non-aligned (intransitive)	35	left	posterior	-0.0593769
-0.6	alpha	Non-aligned (intransitive)	35	mid	frontal	0.499676
-0.6	alpha	Non-aligned (intransitive)	35	mid	central	0.204791
-0.6	alpha	Non-aligned (intransitive)	35	mid	posterior	-0.309702
-0.6	alpha	Non-aligned (intransitive)	35	right	frontal	-0.141555
-0.6	alpha	Non-aligned (intransitive)	35	right	central	-0.0827931
-0.6	alpha	Non-aligned (intransitive)	35	right	posterior	0.0338037
-0.6	alpha	Non-aligned (intransitive)	37	left	frontal	1.43087
-0.6	alpha	Non-aligned (intransitive)	37	left	central	1.64483
-0.6	alpha	Non-aligned (intransitive)	37	left	posterior	1.93449
-0.6	alpha	Non-aligned (intransitive)	37	mid	frontal	1.18557
-0.6	alpha	Non-aligned (intransitive)	37	mid	central	1.60302
-0.6	alpha	Non-aligned (intransitive)	37	mid	posterior	1.57778
-0.6	alpha	Non-aligned (intransitive)	37	right	frontal	1.34936
-0.6	alpha	Non-aligned (intransitive)	37	right	central	2.08748
-0.6	alpha	Non-aligned (intransitive)	37	right	posterior	2.63571
-0.6	alpha	Non-aligned (intransitive)	39	left	frontal	0.052397
-0.6	alpha	Non-aligned (intransitive)	39	left	central	-0.277896
-0.6	alpha	Non-aligned (intransitive)	39	left	posterior	0.00335682
-0.6	alpha	Non-aligned (intransitive)	39	mid	frontal	0.0219885
-0.6	alpha	Non-aligned (intransitive)	39	mid	central	0.355217
-0.6	alpha	Non-aligned (intransitive)	39	mid	posterior	0.528937
-0.6	alpha	Non-aligned (intransitive)	39	right	frontal	0.0920253
-0.6	alpha	Non-aligned (intransitive)	39	right	central	0.185543
-0.6	alpha	Non-aligned (intransitive)	39	right	posterior	0.484241
-0.6	alpha	Non-aligned (intransitive)	41	left	frontal	0.649677
-0.6	alpha	Non-aligned (intransitive)	41	left	central	0.308877
-0.6	alpha	Non-aligned (intransitive)	41	left	posterior	0.594341
-0.6	alpha	Non-aligned (intransitive)	41	mid	frontal	0.27934
-0.6	alpha	Non-aligned (intransitive)	41	mid	central	0.123938
-0.6	alpha	Non-aligned (intransitive)	41	mid	posterior	-0.0225484
-0.6	alpha	Non-aligned (intransitive)	41	right	frontal	0.304098
-0.6	alpha	Non-aligned (intransitive)	41	right	central	0.629606
-0.6	alpha	Non-aligned (intransitive)	41	right	posterior	0.387852
-0.6	alpha	Non-aligned (intransitive)	43	left	frontal	0.535371
-0.6	alpha	Non-aligned (intransitive)	43	left	central	0.572252
-0.6	alpha	Non-aligned (intransitive)	43	left	posterior	0.12837
-0.6	alpha	Non-aligned (intransitive)	43	mid	frontal	-0.171072
-0.6	alpha	Non-aligned (intransitive)	43	mid	central	0.302176
-0.6	alpha	Non-aligned (intransitive)	43	mid	posterior	-0.148917
-0.6	alpha	Non-aligned (intransitive)	43	right	frontal	-0.00858635
-0.6	alpha	Non-aligned (intransitive)	43	right	central	0.314789
-0.6	alpha	Non-aligned (intransitive)	43	right	posterior	0.324054
-0.6	alpha	Non-aligned (intransitive)	45	left	frontal	0.419335
-0.6	alpha	Non-aligned (intransitive)	45	left	central	0.022431
-0.6	alpha	Non-aligned (intransitive)	45	left	posterior	-0.668373
-0.6	alpha	Non-aligned (intransitive)	45	mid	frontal	0.407573
-0.6	alpha	Non-aligned (intransitive)	45	mid	central	-0.055262
-0.6	alpha	Non-aligned (intransitive)	45	mid	posterior	-0.536153
-0.6	alpha	Non-aligned (intransitive)	45	right	frontal	0.883391
-0.6	alpha	Non-aligned (intransitive)	45	right	central	0.433274
-0.6	alpha	Non-aligned (intransitive)	45	right	posterior	-0.304641
-0.6	alpha	Non-aligned (intransitive)	47	left	frontal	0.10353
-0.6	alpha	Non-aligned (intransitive)	47	left	central	0.156388
-0.6	alpha	Non-aligned (intransitive)	47	left	posterior	-0.846671
-0.6	alpha	Non-aligned (intransitive)	47	mid	frontal	-0.362936
-0.6	alpha	Non-aligned (intransitive)	47	mid	central	-0.183816
-0.6	alpha	Non-aligned (intransitive)	47	mid	posterior	-0.6621
-0.6	alpha	Non-aligned (intransitive)	47	right	frontal	-0.397212
-0.6	alpha	Non-aligned (intransitive)	47	right	central	-0.0914971
-0.6	alpha	Non-aligned (intransitive)	47	right	posterior	-0.473309
-0.6	alpha	Non-aligned (intransitive)	49	left	frontal	0.411861
-0.6	alpha	Non-aligned (intransitive)	49	left	central	-0.0494744
-0.6	alpha	Non-aligned (intransitive)	49	left	posterior	0.186486
-0.6	alpha	Non-aligned (intransitive)	49	mid	frontal	-0.529433
-0.6	alpha	Non-aligned (intransitive)	49	mid	central	-0.651632
-0.6	alpha	Non-aligned (intransitive)	49	mid	posterior	-0.549177
-0.6	alpha	Non-aligned (intransitive)	49	right	frontal	-0.644653
-0.6	alpha	Non-aligned (intransitive)	49	right	central	-0.65202
-0.6	alpha	Non-aligned (intransitive)	49	right	posterior	-0.51988
-0.6	alpha	Non-aligned (intransitive)	5	left	frontal	0.733142
-0.6	alpha	Non-aligned (intransitive)	5	left	central	0.0632334
-0.6	alpha	Non-aligned (intransitive)	5	left	posterior	-0.526785
-0.6	alpha	Non-aligned (intransitive)	5	mid	frontal	0.26441
-0.6	alpha	Non-aligned (intransitive)	5	mid	central	0.423396
-0.6	alpha	Non-aligned (intransitive)	5	mid	posterior	0.0848684
-0.6	alpha	Non-aligned (intransitive)	5	right	frontal	0.205992
-0.6	alpha	Non-aligned (intransitive)	5	right	central	-0.429002
-0.6	alpha	Non-aligned (intransitive)	5	right	posterior	-0.319096
-0.6	alpha	Non-aligned (intransitive)	50	left	frontal	-0.135677
-0.6	alpha	Non-aligned (intransitive)	50	left	central	-0.792061
-0.6	alpha	Non-aligned (intransitive)	50	left	posterior	0.0622196
-0.6	alpha	Non-aligned (intransitive)	50	mid	frontal	2.56569
-0.6	alpha	Non-aligned (intransitive)	50	mid	central	-2.09278
-0.6	alpha	Non-aligned (intransitive)	50	mid	posterior	-3.43436
-0.6	alpha	Non-aligned (intransitive)	50	right	frontal	-0.532593
-0.6	alpha	Non-aligned (intransitive)	50	right	central	-1.81412
-0.6	alpha	Non-aligned (intransitive)	50	right	posterior	-2.70751
-0.6	alpha	Non-aligned (intransitive)	7	left	frontal	-0.0458599
-0.6	alpha	Non-aligned (intransitive)	7	left	central	0.0467872
-0.6	alpha	Non-aligned (intransitive)	7	left	posterior	0.204763
-0.6	alpha	Non-aligned (intransitive)	7	mid	frontal	0.189094
-0.6	alpha	Non-aligned (intransitive)	7	mid	central	-0.0434795
-0.6	alpha	Non-aligned (intransitive)	7	mid	posterior	-0.627766
-0.6	alpha	Non-aligned (intransitive)	7	right	frontal	-0.160955
-0.6	alpha	Non-aligned (intransitive)	7	right	central	-0.0278793
-0.6	alpha	Non-aligned (intransitive)	7	right	posterior	-0.684947
-0.6	alpha	Non-aligned (intransitive)	9	left	frontal	-0.542883
-0.6	alpha	Non-aligned (intransitive)	9	left	central	-0.316123
-0.6	alpha	Non-aligned (intransitive)	9	left	posterior	0.107574
-0.6	alpha	Non-aligned (intransitive)	9	mid	frontal	-0.502833
-0.6	alpha	Non-aligned (intransitive)	9	mid	central	-0.56198
-0.6	alpha	Non-aligned (intransitive)	9	mid	posterior	-0.0471085
-0.6	alpha	Non-aligned (intransitive)	9	right	frontal	0.104203
-0.6	alpha	Non-aligned (intransitive)	9	right	central	-0.405818
-0.6	alpha	Non-aligned (intransitive)	9	right	posterior	0.125705
-0.5	alpha	Aligned (transitive)	10	left	frontal	-0.70344
-0.5	alpha	Aligned (transitive)	10	left	central	-0.0187131
-0.5	alpha	Aligned (transitive)	10	left	posterior	-0.259026
-0.5	alpha	Aligned (transitive)	10	mid	frontal	-1.03313
-0.5	alpha	Aligned (transitive)	10	mid	central	-0.509397
-0.5	alpha	Aligned (transitive)	10	mid	posterior	-0.627526
-0.5	alpha	Aligned (transitive)	10	right	frontal	-1.19905
-0.5	alpha	Aligned (transitive)	10	right	central	-0.863733
-0.5	alpha	Aligned (transitive)	10	right	posterior	-0.608994
-0.5	alpha	Aligned (transitive)	12	left	frontal	-0.217146
-0.5	alpha	Aligned (transitive)	12	left	central	-0.0364854
-0.5	alpha	Aligned (transitive)	12	left	posterior	-0.195054
-0.5	alpha	Aligned (transitive)	12	mid	frontal	0.0691723
-0.5	alpha	Aligned (transitive)	12	mid	central	0.00645579
-0.5	alpha	Aligned (transitive)	12	mid	posterior	-0.142032
-0.5	alpha	Aligned (transitive)	12	right	frontal	0.241179
-0.5	alpha	Aligned (transitive)	12	right	central	-0.154634
-0.5	alpha	Aligned (transitive)	12	right	posterior	0.0338246
-0.5	alpha	Aligned (transitive)	14	left	frontal	-0.05342
-0.5	alpha	Aligned (transitive)	14	left	central	-0.252414
-0.5	alpha	Aligned (transitive)	14	left	posterior	-0.350281
-0.5	alpha	Aligned (transitive)	14	mid	frontal	-0.269172
-0.5	alpha	Aligned (transitive)	14	mid	central	-0.740632
-0.5	alpha	Aligned (transitive)	14	mid	posterior	-0.643135
-0.5	alpha	Aligned (transitive)	14	right	frontal	-0.525695
-0.5	alpha	Aligned (transitive)	14	right	central	-0.693012
-0.5	alpha	Aligned (transitive)	14	right	posterior	-0.572997
-0.5	alpha	Aligned (transitive)	16	left	frontal	-0.890265
-0.5	alpha	Aligned (transitive)	16	left	central	-0.709283
-0.5	alpha	Aligned (transitive)	16	left	posterior	-0.26705
-0.5	alpha	Aligned (transitive)	16	mid	frontal	-0.960921
-0.5	alpha	Aligned (transitive)	16	mid	central	-0.833624
-0.5	alpha	Aligned (transitive)	16	mid	posterior	-0.78834
-0.5	alpha	Aligned (transitive)	16	right	frontal	-0.720463
-0.5	alpha	Aligned (transitive)	16	right	central	-0.603806
-0.5	alpha	Aligned (transitive)	16	right	posterior	-0.528794
-0.5	alpha	Aligned (transitive)	18	left	frontal	-0.187849
-0.5	alpha	Aligned (transitive)	18	left	central	0.237471
-0.5	alpha	Aligned (transitive)	18	left	posterior	0.779309
-0.5	alpha	Aligned (transitive)	18	mid	frontal	-0.974318
-0.5	alpha	Aligned (transitive)	18	mid	central	-0.515061
-0.5	alpha	Aligned (transitive)	18	mid	posterior	0.476302
-0.5	alpha	Aligned (transitive)	18	right	frontal	-0.622995
-0.5	alpha	Aligned (transitive)	18	right	central	-0.0465541
-0.5	alpha	Aligned (transitive)	18	right	posterior	0.844365
-0.5	alpha	Aligned (transitive)	2	left	frontal	-0.871689
-0.5	alpha	Aligned (transitive)	2	left	central	-0.482049
-0.5	alpha	Aligned (transitive)	2	left	posterior	-0.342834
-0.5	alpha	Aligned (transitive)	2	mid	frontal	-0.971193
-0.5	alpha	Aligned (transitive)	2	mid	central	-0.530055
-0.5	alpha	Aligned (transitive)	2	mid	posterior	-0.1419
-0.5	alpha	Aligned (transitive)	2	right	frontal	-0.373647
-0.5	alpha	Aligned (transitive)	2	right	central	-0.339712
-0.5	alpha	Aligned (transitive)	2	right	posterior	-0.247685
-0.5	alpha	Aligned (transitive)	20	left	frontal	-0.51421
-0.5	alpha	Aligned (transitive)	20	left	central	1.01124
-0.5	alpha	Aligned (transitive)	20	left	posterior	1.37347
-0.5	alpha	Aligned (transitive)	20	mid	frontal	-0.0707416
-0.5	alpha	Aligned (transitive)	20	mid	central	0.335871
-0.5	alpha	Aligned (transitive)	20	mid	posterior	2.65663
-0.5	alpha	Aligned (transitive)	20	right	frontal	0.251816
-0.5	alpha	Aligned (transitive)	20	right	central	0.901179
-0.5	alpha	Aligned (transitive)	20	right	posterior	-0.198679
-0.5	alpha	Aligned (transitive)	22	left	frontal	-0.117711
-0.5	alpha	Aligned (transitive)	22	left	central	-0.0272651
-0.5	alpha	Aligned (transitive)	22	left	posterior	-0.297672
-0.5	alpha	Aligned (transitive)	22	mid	frontal	0.00382064
-0.5	alpha	Aligned (transitive)	22	mid	central	-0.180238
-0.5	alpha	Aligned (transitive)	22	mid	posterior	-0.995489
-0.5	alpha	Aligned (transitive)	22	right	frontal	0.00449552
-0.5	alpha	Aligned (transitive)	22	right	central	-0.383826
-0.5	alpha	Aligned (transitive)	22	right	posterior	-0.617971
-0.5	alpha	Aligned (transitive)	24	left	frontal	-0.0471748
-0.5	alpha	Aligned (transitive)	24	left	central	0.300809
-0.5	alpha	Aligned (transitive)	24	left	posterior	0.0774769
-0.5	alpha	Aligned (transitive)	24	mid	frontal	-0.150292
-0.5	alpha	Aligned (transitive)	24	mid	central	-0.0556777
-0.5	alpha	Aligned (transitive)	24	mid	posterior	-0.0542388
-0.5	alpha	Aligned (transitive)	24	right	frontal	0.136954
-0.5	alpha	Aligned (transitive)	24	right	central	0.153992
-0.5	alpha	Aligned (transitive)	24	right	posterior	0.306565
-0.5	alpha	Aligned (transitive)	26	left	frontal	-0.132546
-0.5	alpha	Aligned (transitive)	26	left	central	0.427971
-0.5	alpha	Aligned (transitive)	26	left	posterior	0.492123
-0.5	alpha	Aligned (transitive)	26	mid	frontal	-0.752925
-0.5	alpha	Aligned (transitive)	26	mid	central	-0.263252
-0.5	alpha	Aligned (transitive)	26	mid	posterior	0.530052
-0.5	alpha	Aligned (transitive)	26	right	frontal	-0.350267
-0.5	alpha	Aligned (transitive)	26	right	central	0.550552
-0.5	alpha	Aligned (transitive)	26	right	posterior	0.309808
-0.5	alpha	Aligned (transitive)	28	left	frontal	-0.731402
-0.5	alpha	Aligned (transitive)	28	left	central	-0.544001
-0.5	alpha	Aligned (transitive)	28	left	posterior	-0.122192
-0.5	alpha	Aligned (transitive)	28	mid	frontal	-0.627396
-0.5	alpha	Aligned (transitive)	28	mid	central	-0.664886
-0.5	alpha	Aligned (transitive)	28	mid	posterior	-0.25828
-0.5	alpha	Aligned (transitive)	28	right	frontal	-1.09143
-0.5	alpha	Aligned (transitive)	28	right	central	-0.998063
-0.5	alpha	Aligned (transitive)	28	right	posterior	-0.403557
-0.5	alpha	Aligned (transitive)	30	left	frontal	-0.53818
-0.5	alpha	Aligned (transitive)	30	left	central	-0.288489
-0.5	alpha	Aligned (transitive)	30	left	posterior	-0.665588
-0.5	alpha	Aligned (transitive)	30	mid	frontal	-0.61034
-0.5	alpha	Aligned (transitive)	30	mid	central	-0.350764
-0.5	alpha	Aligned (transitive)	30	mid	posterior	-0.657655
-0.5	alpha	Aligned (transitive)	30	right	frontal	-0.0277803
-0.5	alpha	Aligned (transitive)	30	right	central	-0.354563
-0.5	alpha	Aligned (transitive)	30	right	posterior	-0.0690991
-0.5	alpha	Aligned (transitive)	32	left	frontal	-0.0485005
-0.5	alpha	Aligned (transitive)	32	left	central	-0.0774098
-0.5	alpha	Aligned (transitive)	32	left	posterior	0.161468
-0.5	alpha	Aligned (transitive)	32	mid	frontal	-0.0512419
-0.5	alpha	Aligned (transitive)	32	mid	central	-0.220533
-0.5	alpha	Aligned (transitive)	32	mid	posterior	0.554767
-0.5	alpha	Aligned (transitive)	32	right	frontal	0.316401
-0.5	alpha	Aligned (transitive)	32	right	central	0.360993
-0.5	alpha	Aligned (transitive)	32	right	posterior	0.0138581
-0.5	alpha	Aligned (transitive)	34	left	frontal	0.262343
-0.5	alpha	Aligned (transitive)	34	left	central	0.0631167
-0.5	alpha	Aligned (transitive)	34	left	posterior	0.251052
-0.5	alpha	Aligned (transitive)	34	mid	frontal	0.511291
-0.5	alpha	Aligned (transitive)	34	mid	central	0.160813
-0.5	alpha	Aligned (transitive)	34	mid	posterior	-0.317286
-0.5	alpha	Aligned (transitive)	34	right	frontal	0.341351
-0.5	alpha	Aligned (transitive)	34	right	central	0.44611
-0.5	alpha	Aligned (transitive)	34	right	posterior	-0.0918993
-0.5	alpha	Aligned (transitive)	36	left	frontal	0.0424106
-0.5	alpha	Aligned (transitive)	36	left	central	-0.47345
-0.5	alpha	Aligned (transitive)	36	left	posterior	-0.466018
-0.5	alpha	Aligned (transitive)	36	mid	frontal	-0.0460834
-0.5	alpha	Aligned (transitive)	36	mid	central	-0.28147
-0.5	alpha	Aligned (transitive)	36	mid	posterior	-0.658447
-0.5	alpha	Aligned (transitive)	36	right	frontal	0.045507
-0.5	alpha	Aligned (transitive)	36	right	central	-0.0382979
-0.5	alpha	Aligned (transitive)	36	right	posterior	-0.39557
-0.5	alpha	Aligned (transitive)	38	left	frontal	-0.170232
-0.5	alpha	Aligned (transitive)	38	left	central	-0.370105
-0.5	alpha	Aligned (transitive)	38	left	posterior	-0.310646
-0.5	alpha	Aligned (transitive)	38	mid	frontal	0.0161773
-0.5	alpha	Aligned (transitive)	38	mid	central	0.0194215
-0.5	alpha	Aligned (transitive)	38	mid	posterior	0.0208399
-0.5	alpha	Aligned (transitive)	38	right	frontal	-0.0385375
-0.5	alpha	Aligned (transitive)	38	right	central	0.230557
-0.5	alpha	Aligned (transitive)	38	right	posterior	-0.0568966
-0.5	alpha	Aligned (transitive)	4	left	frontal	1.12063
-0.5	alpha	Aligned (transitive)	4	left	central	-0.243709
-0.5	alpha	Aligned (transitive)	4	left	posterior	-0.611329
-0.5	alpha	Aligned (transitive)	4	mid	frontal	0.785254
-0.5	alpha	Aligned (transitive)	4	mid	central	-0.0610609
-0.5	alpha	Aligned (transitive)	4	mid	posterior	-0.663221
-0.5	alpha	Aligned (transitive)	4	right	frontal	0.0853228
-0.5	alpha	Aligned (transitive)	4	right	central	-0.15244
-0.5	alpha	Aligned (transitive)	4	right	posterior	-0.634739
-0.5	alpha	Aligned (transitive)	40	left	frontal	-0.248831
-0.5	alpha	Aligned (transitive)	40	left	central	-0.602531
-0.5	alpha	Aligned (transitive)	40	left	posterior	-0.133844
-0.5	alpha	Aligned (transitive)	40	mid	frontal	-0.398283
-0.5	alpha	Aligned (transitive)	40	mid	central	-0.627508
-0.5	alpha	Aligned (transitive)	40	mid	posterior	-0.275765
-0.5	alpha	Aligned (transitive)	40	right	frontal	0.531831
-0.5	alpha	Aligned (transitive)	40	right	central	0.434259
-0.5	alpha	Aligned (transitive)	40	right	posterior	0.282892
-0.5	alpha	Aligned (transitive)	42	left	frontal	0.0611516
-0.5	alpha	Aligned (transitive)	42	left	central	0.199498
-0.5	alpha	Aligned (transitive)	42	left	posterior	0.0561712
-0.5	alpha	Aligned (transitive)	42	mid	frontal	-0.324401
-0.5	alpha	Aligned (transitive)	42	mid	central	-0.27022
-0.5	alpha	Aligned (transitive)	42	mid	posterior	0.0256585
-0.5	alpha	Aligned (transitive)	42	right	frontal	-0.158875
-0.5	alpha	Aligned (transitive)	42	right	central	-0.251985
-0.5	alpha	Aligned (transitive)	42	right	posterior	-0.377592
-0.5	alpha	Aligned (transitive)	44	left	frontal	0.022619
-0.5	alpha	Aligned (transitive)	44	left	central	-0.417361
-0.5	alpha	Aligned (transitive)	44	left	posterior	-0.399037
-0.5	alpha	Aligned (transitive)	44	mid	frontal	-0.136785
-0.5	alpha	Aligned (transitive)	44	mid	central	-0.0984363
-0.5	alpha	Aligned (transitive)	44	mid	posterior	-0.301281
-0.5	alpha	Aligned (transitive)	44	right	frontal	-0.289994
-0.5	alpha	Aligned (transitive)	44	right	central	-0.432318
-0.5	alpha	Aligned (transitive)	44	right	posterior	0.00536681
-0.5	alpha	Aligned (transitive)	46	left	frontal	-0.1187
-0.5	alpha	Aligned (transitive)	46	left	central	0.185034
-0.5	alpha	Aligned (transitive)	46	left	posterior	0.610109
-0.5	alpha	Aligned (transitive)	46	mid	frontal	-0.0997545
-0.5	alpha	Aligned (transitive)	46	mid	central	0.127385
-0.5	alpha	Aligned (transitive)	46	mid	posterior	0.43894
-0.5	alpha	Aligned (transitive)	46	right	frontal	-0.109257
-0.5	alpha	Aligned (transitive)	46	right	central	-0.213461
-0.5	alpha	Aligned (transitive)	46	right	posterior	0.391562
-0.5	alpha	Aligned (transitive)	48	left	frontal	-0.671985
-0.5	alpha	Aligned (transitive)	48	left	central	-0.746063
-0.5	alpha	Aligned (transitive)	48	left	posterior	-0.374451
-0.5	alpha	Aligned (transitive)	48	mid	frontal	-0.993434
-0.5	alpha	Aligned (transitive)	48	mid	central	-1.01914
-0.5	alpha	Aligned (transitive)	48	mid	posterior	-0.386165
-0.5	alpha	Aligned (transitive)	48	right	frontal	-1.01408
-0.5	alpha	Aligned (transitive)	48	right	central	-0.370032
-0.5	alpha	Aligned (transitive)	48	right	posterior	-0.0348012
-0.5	alpha	Aligned (transitive)	50	left	frontal	0.155558
-0.5	alpha	Aligned (transitive)	50	left	central	-0.0551503
-0.5	alpha	Aligned (transitive)	50	left	posterior	0.241334
-0.5	alpha	Aligned (transitive)	50	mid	frontal	0.116012
-0.5	alpha	Aligned (transitive)	50	mid	central	-0.517638
-0.5	alpha	Aligned (transitive)	50	mid	posterior	-0.199299
-0.5	alpha	Aligned (transitive)	50	right	frontal	-0.0288008
-0.5	alpha	Aligned (transitive)	50	right	central	-0.543681
-0.5	alpha	Aligned (transitive)	50	right	posterior	-0.102227
-0.5	alpha	Aligned (transitive)	6	left	frontal	-0.223395
-0.5	alpha	Aligned (transitive)	6	left	central	-0.488547
-0.5	alpha	Aligned (transitive)	6	left	posterior	-0.255969
-0.5	alpha	Aligned (transitive)	6	mid	frontal	0.103903
-0.5	alpha	Aligned (transitive)	6	mid	central	-0.311721
-0.5	alpha	Aligned (transitive)	6	mid	posterior	-0.130146
-0.5	alpha	Aligned (transitive)	6	right	frontal	-0.120603
-0.5	alpha	Aligned (transitive)	6	right	central	-0.0427233
-0.5	alpha	Aligned (transitive)	6	right	posterior	-0.351519
-0.5	alpha	Aligned (transitive)	8	left	frontal	-0.318092
-0.5	alpha	Aligned (transitive)	8	left	central	0.117509
-0.5	alpha	Aligned (transitive)	8	left	posterior	0.313048
-0.5	alpha	Aligned (transitive)	8	mid	frontal	-0.393149
-0.5	alpha	Aligned (transitive)	8	mid	central	0.0551609
-0.5	alpha	Aligned (transitive)	8	mid	posterior	0.229075
-0.5	alpha	Aligned (transitive)	8	right	frontal	-0.212087
-0.5	alpha	Aligned (transitive)	8	right	central	-0.10448
-0.5	alpha	Aligned (transitive)	8	right	posterior	-0.100991
-0.5	alpha	Non-aligned (transitive)	1	left	frontal	-0.546791
-0.5	alpha	Non-aligned (transitive)	1	left	central	-0.168886
-0.5	alpha	Non-aligned (transitive)	1	left	posterior	-0.0319438
-0.5	alpha	Non-aligned (transitive)	1	mid	frontal	-0.872339
-0.5	alpha	Non-aligned (transitive)	1	mid	central	-0.88048
-0.5	alpha	Non-aligned (transitive)	1	mid	posterior	-0.296271
-0.5	alpha	Non-aligned (transitive)	1	right	frontal	-0.811467
-0.5	alpha	Non-aligned (transitive)	1	right	central	-0.720921
-0.5	alpha	Non-aligned (transitive)	1	right	posterior	-0.409097
-0.5	alpha	Non-aligned (transitive)	11	left	frontal	-0.169955
-0.5	alpha	Non-aligned (transitive)	11	left	central	-0.627773
-0.5	alpha	Non-aligned (transitive)	11	left	posterior	-0.199111
-0.5	alpha	Non-aligned (transitive)	11	mid	frontal	-0.694139
-0.5	alpha	Non-aligned (transitive)	11	mid	central	-0.808117
-0.5	alpha	Non-aligned (transitive)	11	mid	posterior	0.220648
-0.5	alpha	Non-aligned (transitive)	11	right	frontal	-0.779858
-0.5	alpha	Non-aligned (transitive)	11	right	central	-0.638588
-0.5	alpha	Non-aligned (transitive)	11	right	posterior	-0.468213
-0.5	alpha	Non-aligned (transitive)	13	left	frontal	-0.0827794
-0.5	alpha	Non-aligned (transitive)	13	left	central	-0.411049
-0.5	alpha	Non-aligned (transitive)	13	left	posterior	-0.161168
-0.5	alpha	Non-aligned (transitive)	13	mid	frontal	-0.192426
-0.5	alpha	Non-aligned (transitive)	13	mid	central	-0.448261
-0.5	alpha	Non-aligned (transitive)	13	mid	posterior	-0.626521
-0.5	alpha	Non-aligned (transitive)	13	right	frontal	-1.00993
-0.5	alpha	Non-aligned (transitive)	13	right	central	-0.858895
-0.5	alpha	Non-aligned (transitive)	13	right	posterior	-0.315453
-0.5	alpha	Non-aligned (transitive)	15	left	frontal	-0.692468
-0.5	alpha	Non-aligned (transitive)	15	left	central	-0.467858
-0.5	alpha	Non-aligned (transitive)	15	left	posterior	-0.355228
-0.5	alpha	Non-aligned (transitive)	15	mid	frontal	-0.563658
-0.5	alpha	Non-aligned (transitive)	15	mid	central	-0.413429
-0.5	alpha	Non-aligned (transitive)	15	mid	posterior	-0.0767625
-0.5	alpha	Non-aligned (transitive)	15	right	frontal	-0.725845
-0.5	alpha	Non-aligned (transitive)	15	right	central	-0.630642
-0.5	alpha	Non-aligned (transitive)	15	right	posterior	-0.0428616
-0.5	alpha	Non-aligned (transitive)	17	left	frontal	0.651064
-0.5	alpha	Non-aligned (transitive)	17	left	central	0.969229
-0.5	alpha	Non-aligned (transitive)	17	left	posterior	1.06913
-0.5	alpha	Non-aligned (transitive)	17	mid	frontal	-0.210826
-0.5	alpha	Non-aligned (transitive)	17	mid	central	0.0863276
-0.5	alpha	Non-aligned (transitive)	17	mid	posterior	0.260254
-0.5	alpha	Non-aligned (transitive)	17	right	frontal	-0.293325
-0.5	alpha	Non-aligned (transitive)	17	right	central	0.154279
-0.5	alpha	Non-aligned (transitive)	17	right	posterior	0.673555
-0.5	alpha	Non-aligned (transitive)	19	left	frontal	0.295757
-0.5	alpha	Non-aligned (transitive)	19	left	central	-0.311598
-0.5	alpha	Non-aligned (transitive)	19	left	posterior	0.401272
-0.5	alpha	Non-aligned (transitive)	19	mid	frontal	-0.00934531
-0.5	alpha	Non-aligned (transitive)	19	mid	central	-0.504949
-0.5	alpha	Non-aligned (transitive)	19	mid	posterior	0.376134
-0.5	alpha	Non-aligned (transitive)	19	right	frontal	-0.129439
-0.5	alpha	Non-aligned (transitive)	19	right	central	-0.122238
-0.5	alpha	Non-aligned (transitive)	19	right	posterior	0.173624
-0.5	alpha	Non-aligned (transitive)	21	left	frontal	0.500969
-0.5	alpha	Non-aligned (transitive)	21	left	central	0.398561
-0.5	alpha	Non-aligned (transitive)	21	left	posterior	-0.697069
-0.5	alpha	Non-aligned (transitive)	21	mid	frontal	0.732571
-0.5	alpha	Non-aligned (transitive)	21	mid	central	-0.122245
-0.5	alpha	Non-aligned (transitive)	21	mid	posterior	-0.933522
-0.5	alpha	Non-aligned (transitive)	21	right	frontal	-0.0352305
-0.5	alpha	Non-aligned (transitive)	21	right	central	-0.439778
-0.5	alpha	Non-aligned (transitive)	21	right	posterior	-0.329693
-0.5	alpha	Non-aligned (transitive)	23	left	frontal	-0.541897
-0.5	alpha	Non-aligned (transitive)	23	left	central	-0.494456
-0.5	alpha	Non-aligned (transitive)	23	left	posterior	-0.309171
-0.5	alpha	Non-aligned (transitive)	23	mid	frontal	-0.0612563
-0.5	alpha	Non-aligned (transitive)	23	mid	central	-0.759495
-0.5	alpha	Non-aligned (transitive)	23	mid	posterior	-0.221851
-0.5	alpha	Non-aligned (transitive)	23	right	frontal	0.235614
-0.5	alpha	Non-aligned (transitive)	23	right	central	-0.715092
-0.5	alpha	Non-aligned (transitive)	23	right	posterior	-0.631666
-0.5	alpha	Non-aligned (transitive)	24	left	frontal	1.73026
-0.5	alpha	Non-aligned (transitive)	24	left	central	1.17993
-0.5	alpha	Non-aligned (transitive)	24	left	posterior	0.348239
-0.5	alpha	Non-aligned (transitive)	24	mid	frontal	-1.21984
-0.5	alpha	Non-aligned (transitive)	24	mid	central	0.333099
-0.5	alpha	Non-aligned (transitive)	24	mid	posterior	0.30413
-0.5	alpha	Non-aligned (transitive)	24	right	frontal	-0.284215
-0.5	alpha	Non-aligned (transitive)	24	right	central	-0.802971
-0.5	alpha	Non-aligned (transitive)	24	right	posterior	0.98513
-0.5	alpha	Non-aligned (transitive)	25	left	frontal	-0.556427
-0.5	alpha	Non-aligned (transitive)	25	left	central	-0.251604
-0.5	alpha	Non-aligned (transitive)	25	left	posterior	0.018845
-0.5	alpha	Non-aligned (transitive)	25	mid	frontal	-0.464936
-0.5	alpha	Non-aligned (transitive)	25	mid	central	-0.152669
-0.5	alpha	Non-aligned (transitive)	25	mid	posterior	0.56185
-0.5	alpha	Non-aligned (transitive)	25	right	frontal	-0.0107641
-0.5	alpha	Non-aligned (transitive)	25	right	central	-0.191188
-0.5	alpha	Non-aligned (transitive)	25	right	posterior	-0.126208
-0.5	alpha	Non-aligned (transitive)	27	left	frontal	-0.277576
-0.5	alpha	Non-aligned (transitive)	27	left	central	0.353365
-0.5	alpha	Non-aligned (transitive)	27	left	posterior	0.759017
-0.5	alpha	Non-aligned (transitive)	27	mid	frontal	-0.234765
-0.5	alpha	Non-aligned (transitive)	27	mid	central	0.886375
-0.5	alpha	Non-aligned (transitive)	27	mid	posterior	-0.0154675
-0.5	alpha	Non-aligned (transitive)	27	right	frontal	0.0439306
-0.5	alpha	Non-aligned (transitive)	27	right	central	0.546119
-0.5	alpha	Non-aligned (transitive)	27	right	posterior	0.0289996
-0.5	alpha	Non-aligned (transitive)	29	left	frontal	0.46697
-0.5	alpha	Non-aligned (transitive)	29	left	central	0.533593
-0.5	alpha	Non-aligned (transitive)	29	left	posterior	-0.374749
-0.5	alpha	Non-aligned (transitive)	29	mid	frontal	0.167912
-0.5	alpha	Non-aligned (transitive)	29	mid	central	0.897315
-0.5	alpha	Non-aligned (transitive)	29	mid	posterior	-0.556257
-0.5	alpha	Non-aligned (transitive)	29	right	frontal	0.143379
-0.5	alpha	Non-aligned (transitive)	29	right	central	0.422069
-0.5	alpha	Non-aligned (transitive)	29	right	posterior	-0.220785
-0.5	alpha	Non-aligned (transitive)	3	left	frontal	-0.211745
-0.5	alpha	Non-aligned (transitive)	3	left	central	-0.567057
-0.5	alpha	Non-aligned (transitive)	3	left	posterior	0.0471962
-0.5	alpha	Non-aligned (transitive)	3	mid	frontal	-0.050202
-0.5	alpha	Non-aligned (transitive)	3	mid	central	-0.176138
-0.5	alpha	Non-aligned (transitive)	3	mid	posterior	-0.163295
-0.5	alpha	Non-aligned (transitive)	3	right	frontal	0.131545
-0.5	alpha	Non-aligned (transitive)	3	right	central	0.193602
-0.5	alpha	Non-aligned (transitive)	3	right	posterior	-0.0183115
-0.5	alpha	Non-aligned (transitive)	31	left	frontal	0.136486
-0.5	alpha	Non-aligned (transitive)	31	left	central	1.88554
-0.5	alpha	Non-aligned (transitive)	31	left	posterior	0.413704
-0.5	alpha	Non-aligned (transitive)	31	mid	frontal	0.881346
-0.5	alpha	Non-aligned (transitive)	31	mid	central	1.33155
-0.5	alpha	Non-aligned (transitive)	31	mid	posterior	0.135884
-0.5	alpha	Non-aligned (transitive)	31	right	frontal	1.23848
-0.5	alpha	Non-aligned (transitive)	31	right	central	1.76672
-0.5	alpha	Non-aligned (transitive)	31	right	posterior	-0.539645
-0.5	alpha	Non-aligned (transitive)	33	left	frontal	0.121192
-0.5	alpha	Non-aligned (transitive)	33	left	central	0.0549227
-0.5	alpha	Non-aligned (transitive)	33	left	posterior	0.177658
-0.5	alpha	Non-aligned (transitive)	33	mid	frontal	-0.522947
-0.5	alpha	Non-aligned (transitive)	33	mid	central	-0.186385
-0.5	alpha	Non-aligned (transitive)	33	mid	posterior	-0.380763
-0.5	alpha	Non-aligned (transitive)	33	right	frontal	-0.772312
-0.5	alpha	Non-aligned (transitive)	33	right	central	-0.275782
-0.5	alpha	Non-aligned (transitive)	33	right	posterior	0.147715
-0.5	alpha	Non-aligned (transitive)	35	left	frontal	0.211264
-0.5	alpha	Non-aligned (transitive)	35	left	central	0.00584818
-0.5	alpha	Non-aligned (transitive)	35	left	posterior	0.250432
-0.5	alpha	Non-aligned (transitive)	35	mid	frontal	-0.0177826
-0.5	alpha	Non-aligned (transitive)	35	mid	central	0.0707889
-0.5	alpha	Non-aligned (transitive)	35	mid	posterior	0.266582
-0.5	alpha	Non-aligned (transitive)	35	right	frontal	-0.0175705
-0.5	alpha	Non-aligned (transitive)	35	right	central	0.125486
-0.5	alpha	Non-aligned (transitive)	35	right	posterior	-0.0863191
-0.5	alpha	Non-aligned (transitive)	37	left	frontal	0.570963
-0.5	alpha	Non-aligned (transitive)	37	left	central	0.16974
-0.5	alpha	Non-aligned (transitive)	37	left	posterior	0.243612
-0.5	alpha	Non-aligned (transitive)	37	mid	frontal	0.30822
-0.5	alpha	Non-aligned (transitive)	37	mid	central	0.729522
-0.5	alpha	Non-aligned (transitive)	37	mid	posterior	0.758628
-0.5	alpha	Non-aligned (transitive)	37	right	frontal	0.164912
-0.5	alpha	Non-aligned (transitive)	37	right	central	0.235815
-0.5	alpha	Non-aligned (transitive)	37	right	posterior	0.162447
-0.5	alpha	Non-aligned (transitive)	39	left	frontal	0.60229
-0.5	alpha	Non-aligned (transitive)	39	left	central	-0.0478921
-0.5	alpha	Non-aligned (transitive)	39	left	posterior	-0.821266
-0.5	alpha	Non-aligned (transitive)	39	mid	frontal	0.0465687
-0.5	alpha	Non-aligned (transitive)	39	mid	central	-0.102639
-0.5	alpha	Non-aligned (transitive)	39	mid	posterior	-0.937124
-0.5	alpha	Non-aligned (transitive)	39	right	frontal	-0.167469
-0.5	alpha	Non-aligned (transitive)	39	right	central	-0.307808
-0.5	alpha	Non-aligned (transitive)	39	right	posterior	-0.712353
-0.5	alpha	Non-aligned (transitive)	4	left	frontal	0.402377
-0.5	alpha	Non-aligned (transitive)	4	left	central	1.25172
-0.5	alpha	Non-aligned (transitive)	4	left	posterior	0.787969
-0.5	alpha	Non-aligned (transitive)	4	mid	frontal	1.89805
-0.5	alpha	Non-aligned (transitive)	4	mid	central	0.166664
-0.5	alpha	Non-aligned (transitive)	4	mid	posterior	-2.4007
-0.5	alpha	Non-aligned (transitive)	4	right	frontal	0.472774
-0.5	alpha	Non-aligned (transitive)	4	right	central	1.09028
-0.5	alpha	Non-aligned (transitive)	4	right	posterior	-1.19078
-0.5	alpha	Non-aligned (transitive)	41	left	frontal	0.719909
-0.5	alpha	Non-aligned (transitive)	41	left	central	0.27543
-0.5	alpha	Non-aligned (transitive)	41	left	posterior	0.189222
-0.5	alpha	Non-aligned (transitive)	41	mid	frontal	0.279204
-0.5	alpha	Non-aligned (transitive)	41	mid	central	0.186474
-0.5	alpha	Non-aligned (transitive)	41	mid	posterior	-0.208469
-0.5	alpha	Non-aligned (transitive)	41	right	frontal	0.0190437
-0.5	alpha	Non-aligned (transitive)	41	right	central	0.300679
-0.5	alpha	Non-aligned (transitive)	41	right	posterior	0.141567
-0.5	alpha	Non-aligned (transitive)	43	left	frontal	-0.859583
-0.5	alpha	Non-aligned (transitive)	43	left	central	-0.675251
-0.5	alpha	Non-aligned (transitive)	43	left	posterior	-0.147258
-0.5	alpha	Non-aligned (transitive)	43	mid	frontal	-1.11788
-0.5	alpha	Non-aligned (transitive)	43	mid	central	-0.456923
-0.5	alpha	Non-aligned (transitive)	43	mid	posterior	-0.029327
-0.5	alpha	Non-aligned (transitive)	43	right	frontal	-0.892211
-0.5	alpha	Non-aligned (transitive)	43	right	central	-0.398751
-0.5	alpha	Non-aligned (transitive)	43	right	posterior	-0.214576
-0.5	alpha	Non-aligned (transitive)	45	left	frontal	-0.213971
-0.5	alpha	Non-aligned (transitive)	45	left	central	-0.139004
-0.5	alpha	Non-aligned (transitive)	45	left	posterior	-0.0642318
-0.5	alpha	Non-aligned (transitive)	45	mid	frontal	-0.532186
-0.5	alpha	Non-aligned (transitive)	45	mid	central	-0.477787
-0.5	alpha	Non-aligned (transitive)	45	mid	posterior	0.29072
-0.5	alpha	Non-aligned (transitive)	45	right	frontal	-0.370996
-0.5	alpha	Non-aligned (transitive)	45	right	central	-0.219218
-0.5	alpha	Non-aligned (transitive)	45	right	posterior	0.296202
-0.5	alpha	Non-aligned (transitive)	47	left	frontal	-1.08946
-0.5	alpha	Non-aligned (transitive)	47	left	central	-0.276791
-0.5	alpha	Non-aligned (transitive)	47	left	posterior	-0.824499
-0.5	alpha	Non-aligned (transitive)	47	mid	frontal	-1.23822
-0.5	alpha	Non-aligned (transitive)	47	mid	central	-0.147134
-0.5	alpha	Non-aligned (transitive)	47	mid	posterior	-0.0666239
-0.5	alpha	Non-aligned (transitive)	47	right	frontal	-0.397318
-0.5	alpha	Non-aligned (transitive)	47	right	central	0.300692
-0.5	alpha	Non-aligned (transitive)	47	right	posterior	-0.161931
-0.5	alpha	Non-aligned (transitive)	49	left	frontal	-0.663566
-0.5	alpha	Non-aligned (transitive)	49	left	central	-1.20193
-0.5	alpha	Non-aligned (transitive)	49	left	posterior	-0.840843
-0.5	alpha	Non-aligned (transitive)	49	mid	frontal	-0.471471
-0.5	alpha	Non-aligned (transitive)	49	mid	central	-0.36287
-0.5	alpha	Non-aligned (transitive)	49	mid	posterior	-0.375654
-0.5	alpha	Non-aligned (transitive)	49	right	frontal	-0.193392
-0.5	alpha	Non-aligned (transitive)	49	right	central	-0.34334
-0.5	alpha	Non-aligned (transitive)	49	right	posterior	-0.432786
-0.5	alpha	Non-aligned (transitive)	5	left	frontal	0.554849
-0.5	alpha	Non-aligned (transitive)	5	left	central	0.70792
-0.5	alpha	Non-aligned (transitive)	5	left	posterior	-0.20993
-0.5	alpha	Non-aligned (transitive)	5	mid	frontal	0.447345
-0.5	alpha	Non-aligned (transitive)	5	mid	central	0.367228
-0.5	alpha	Non-aligned (transitive)	5	mid	posterior	-0.14452
-0.5	alpha	Non-aligned (transitive)	5	right	frontal	0.109823
-0.5	alpha	Non-aligned (transitive)	5	right	central	-0.194454
-0.5	alpha	Non-aligned (transitive)	5	right	posterior	-0.8638
-0.5	alpha	Non-aligned (transitive)	7	left	frontal	-0.748871
-0.5	alpha	Non-aligned (transitive)	7	left	central	-0.0157855
-0.5	alpha	Non-aligned (transitive)	7	left	posterior	-0.254888
-0.5	alpha	Non-aligned (transitive)	7	mid	frontal	-0.629752
-0.5	alpha	Non-aligned (transitive)	7	mid	central	-0.416673
-0.5	alpha	Non-aligned (transitive)	7	mid	posterior	-0.0994505
-0.5	alpha	Non-aligned (transitive)	7	right	frontal	-0.236091
-0.5	alpha	Non-aligned (transitive)	7	right	central	-0.282951
-0.5	alpha	Non-aligned (transitive)	7	right	posterior	-0.291768
-0.5	alpha	Non-aligned (transitive)	8	left	frontal	0.88835
-0.5	alpha	Non-aligned (transitive)	8	left	central	2.13618
-0.5	alpha	Non-aligned (transitive)	8	left	posterior	0.474749
-0.5	alpha	Non-aligned (transitive)	8	mid	frontal	0.967692
-0.5	alpha	Non-aligned (transitive)	8	mid	central	-0.377863
-0.5	alpha	Non-aligned (transitive)	8	mid	posterior	-2.11828
-0.5	alpha	Non-aligned (transitive)	8	right	frontal	1.02617
-0.5	alpha	Non-aligned (transitive)	8	right	central	-0.305466
-0.5	alpha	Non-aligned (transitive)	8	right	posterior	-0.90903
-0.5	alpha	Non-aligned (transitive)	9	left	frontal	-0.95769
-0.5	alpha	Non-aligned (transitive)	9	left	central	-0.261293
-0.5	alpha	Non-aligned (transitive)	9	left	posterior	-0.0719837
-0.5	alpha	Non-aligned (transitive)	9	mid	frontal	-0.38912
-0.5	alpha	Non-aligned (transitive)	9	mid	central	-0.118341
-0.5	alpha	Non-aligned (transitive)	9	mid	posterior	0.131361
-0.5	alpha	Non-aligned (transitive)	9	right	frontal	-0.0442734
-0.5	alpha	Non-aligned (transitive)	9	right	central	0.00693858
-0.5	alpha	Non-aligned (transitive)	9	right	posterior	-0.303271
-0.5	alpha	Aligned (intransitive)	10	left	frontal	-0.841822
-0.5	alpha	Aligned (intransitive)	10	left	central	-0.228127
-0.5	alpha	Aligned (intransitive)	10	left	posterior	0.176585
-0.5	alpha	Aligned (intransitive)	10	mid	frontal	-0.905205
-0.5	alpha	Aligned (intransitive)	10	mid	central	-0.792474
-0.5	alpha	Aligned (intransitive)	10	mid	posterior	-0.0309632
-0.5	alpha	Aligned (intransitive)	10	right	frontal	-0.779032
-0.5	alpha	Aligned (intransitive)	10	right	central	-1.01162
-0.5	alpha	Aligned (intransitive)	10	right	posterior	0.081649
-0.5	alpha	Aligned (intransitive)	12	left	frontal	-0.306933
-0.5	alpha	Aligned (intransitive)	12	left	central	0.124354
-0.5	alpha	Aligned (intransitive)	12	left	posterior	0.26431
-0.5	alpha	Aligned (intransitive)	12	mid	frontal	-0.114607
-0.5	alpha	Aligned (intransitive)	12	mid	central	0.397429
-0.5	alpha	Aligned (intransitive)	12	mid	posterior	0.236925
-0.5	alpha	Aligned (intransitive)	12	right	frontal	0.143101
-0.5	alpha	Aligned (intransitive)	12	right	central	0.265218
-0.5	alpha	Aligned (intransitive)	12	right	posterior	0.46416
-0.5	alpha	Aligned (intransitive)	14	left	frontal	-0.218466
-0.5	alpha	Aligned (intransitive)	14	left	central	-0.163121
-0.5	alpha	Aligned (intransitive)	14	left	posterior	0.428233
-0.5	alpha	Aligned (intransitive)	14	mid	frontal	-0.59063
-0.5	alpha	Aligned (intransitive)	14	mid	central	-0.396521
-0.5	alpha	Aligned (intransitive)	14	mid	posterior	-0.105259
-0.5	alpha	Aligned (intransitive)	14	right	frontal	0.188605
-0.5	alpha	Aligned (intransitive)	14	right	central	-0.0700461
-0.5	alpha	Aligned (intransitive)	14	right	posterior	0.128297
-0.5	alpha	Aligned (intransitive)	16	left	frontal	-0.548738
-0.5	alpha	Aligned (intransitive)	16	left	central	-0.845245
-0.5	alpha	Aligned (intransitive)	16	left	posterior	-0.499495
-0.5	alpha	Aligned (intransitive)	16	mid	frontal	-0.678699
-0.5	alpha	Aligned (intransitive)	16	mid	central	-1.11632
-0.5	alpha	Aligned (intransitive)	16	mid	posterior	-1.21832
-0.5	alpha	Aligned (intransitive)	16	right	frontal	-0.730291
-0.5	alpha	Aligned (intransitive)	16	right	central	-0.991143
-0.5	alpha	Aligned (intransitive)	16	right	posterior	-0.51355
-0.5	alpha	Aligned (intransitive)	18	left	frontal	0.447863
-0.5	alpha	Aligned (intransitive)	18	left	central	0.282202
-0.5	alpha	Aligned (intransitive)	18	left	posterior	0.0304982
-0.5	alpha	Aligned (intransitive)	18	mid	frontal	-0.238578
-0.5	alpha	Aligned (intransitive)	18	mid	central	0.349807
-0.5	alpha	Aligned (intransitive)	18	mid	posterior	0.3052
-0.5	alpha	Aligned (intransitive)	18	right	frontal	0.0260369
-0.5	alpha	Aligned (intransitive)	18	right	central	0.225117
-0.5	alpha	Aligned (intransitive)	18	right	posterior	0.480264
-0.5	alpha	Aligned (intransitive)	2	left	frontal	0.0218629
-0.5	alpha	Aligned (intransitive)	2	left	central	-0.0248082
-0.5	alpha	Aligned (intransitive)	2	left	posterior	0.421945
-0.5	alpha	Aligned (intransitive)	2	mid	frontal	-0.447642
-0.5	alpha	Aligned (intransitive)	2	mid	central	0.175563
-0.5	alpha	Aligned (intransitive)	2	mid	posterior	0.0639063
-0.5	alpha	Aligned (intransitive)	2	right	frontal	0.233105
-0.5	alpha	Aligned (intransitive)	2	right	central	0.469831
-0.5	alpha	Aligned (intransitive)	2	right	posterior	0.495115
-0.5	alpha	Aligned (intransitive)	20	left	frontal	-0.697215
-0.5	alpha	Aligned (intransitive)	20	left	central	-0.333913
-0.5	alpha	Aligned (intransitive)	20	left	posterior	-0.626415
-0.5	alpha	Aligned (intransitive)	20	mid	frontal	-0.763876
-0.5	alpha	Aligned (intransitive)	20	mid	central	-1.72446
-0.5	alpha	Aligned (intransitive)	20	mid	posterior	-0.955129
-0.5	alpha	Aligned (intransitive)	20	right	frontal	-0.610465
-0.5	alpha	Aligned (intransitive)	20	right	central	-1.42655
-0.5	alpha	Aligned (intransitive)	20	right	posterior	-0.501616
-0.5	alpha	Aligned (intransitive)	22	left	frontal	-0.217806
-0.5	alpha	Aligned (intransitive)	22	left	central	-0.102569
-0.5	alpha	Aligned (intransitive)	22	left	posterior	0.268949
-0.5	alpha	Aligned (intransitive)	22	mid	frontal	-0.378547
-0.5	alpha	Aligned (intransitive)	22	mid	central	-0.316392
-0.5	alpha	Aligned (intransitive)	22	mid	posterior	-0.42838
-0.5	alpha	Aligned (intransitive)	22	right	frontal	0.056852
-0.5	alpha	Aligned (intransitive)	22	right	central	-0.537755
-0.5	alpha	Aligned (intransitive)	22	right	posterior	-0.261628
-0.5	alpha	Aligned (intransitive)	24	left	frontal	-1.09053
-0.5	alpha	Aligned (intransitive)	24	left	central	-0.526663
-0.5	alpha	Aligned (intransitive)	24	left	posterior	0.0909605
-0.5	alpha	Aligned (intransitive)	24	mid	frontal	-0.950848
-0.5	alpha	Aligned (intransitive)	24	mid	central	-0.962055
-0.5	alpha	Aligned (intransitive)	24	mid	posterior	-0.248982
-0.5	alpha	Aligned (intransitive)	24	right	frontal	-0.539929
-0.5	alpha	Aligned (intransitive)	24	right	central	-0.372518
-0.5	alpha	Aligned (intransitive)	24	right	posterior	0.0719923
-0.5	alpha	Aligned (intransitive)	26	left	frontal	-0.560351
-0.5	alpha	Aligned (intransitive)	26	left	central	-0.415594
-0.5	alpha	Aligned (intransitive)	26	left	posterior	0.293367
-0.5	alpha	Aligned (intransitive)	26	mid	frontal	-0.841533
-0.5	alpha	Aligned (intransitive)	26	mid	central	-0.494649
-0.5	alpha	Aligned (intransitive)	26	mid	posterior	-0.162571
-0.5	alpha	Aligned (intransitive)	26	right	frontal	-0.166769
-0.5	alpha	Aligned (intransitive)	26	right	central	-0.470932
-0.5	alpha	Aligned (intransitive)	26	right	posterior	-0.477898
-0.5	alpha	Aligned (intransitive)	28	left	frontal	-0.544022
-0.5	alpha	Aligned (intransitive)	28	left	central	-0.0311509
-0.5	alpha	Aligned (intransitive)	28	left	posterior	-0.290302
-0.5	alpha	Aligned (intransitive)	28	mid	frontal	-0.58051
-0.5	alpha	Aligned (intransitive)	28	mid	central	-0.25698
-0.5	alpha	Aligned (intransitive)	28	mid	posterior	-0.473001
-0.5	alpha	Aligned (intransitive)	28	right	frontal	-0.585941
-0.5	alpha	Aligned (intransitive)	28	right	central	-0.254412
-0.5	alpha	Aligned (intransitive)	28	right	posterior	-0.302224
-0.5	alpha	Aligned (intransitive)	30	left	frontal	-0.710495
-0.5	alpha	Aligned (intransitive)	30	left	central	-0.167023
-0.5	alpha	Aligned (intransitive)	30	left	posterior	-0.0402509
-0.5	alpha	Aligned (intransitive)	30	mid	frontal	-0.814615
-0.5	alpha	Aligned (intransitive)	30	mid	central	-0.580552
-0.5	alpha	Aligned (intransitive)	30	mid	posterior	-0.1643
-0.5	alpha	Aligned (intransitive)	30	right	frontal	-0.586186
-0.5	alpha	Aligned (intransitive)	30	right	central	-0.260833
-0.5	alpha	Aligned (intransitive)	30	right	posterior	-0.0762857
-0.5	alpha	Aligned (intransitive)	32	left	frontal	0.274568
-0.5	alpha	Aligned (intransitive)	32	left	central	-0.0944357
-0.5	alpha	Aligned (intransitive)	32	left	posterior	0.209839
-0.5	alpha	Aligned (intransitive)	32	mid	frontal	-0.222078
-0.5	alpha	Aligned (intransitive)	32	mid	central	0.120303
-0.5	alpha	Aligned (intransitive)	32	mid	posterior	0.647399
-0.5	alpha	Aligned (intransitive)	32	right	frontal	-0.132278
-0.5	alpha	Aligned (intransitive)	32	right	central	0.0450722
-0.5	alpha	Aligned (intransitive)	32	right	posterior	-0.011629
-0.5	alpha	Aligned (intransitive)	34	left	frontal	-0.515676
-0.5	alpha	Aligned (intransitive)	34	left	central	-0.0328577
-0.5	alpha	Aligned (intransitive)	34	left	posterior	-0.479203
-0.5	alpha	Aligned (intransitive)	34	mid	frontal	-0.472932
-0.5	alpha	Aligned (intransitive)	34	mid	central	-0.131805
-0.5	alpha	Aligned (intransitive)	34	mid	posterior	-0.0930617
-0.5	alpha	Aligned (intransitive)	34	right	frontal	-0.0987637
-0.5	alpha	Aligned (intransitive)	34	right	central	-0.594008
-0.5	alpha	Aligned (intransitive)	34	right	posterior	0.0185475
-0.5	alpha	Aligned (intransitive)	36	left	frontal	-0.26334
-0.5	alpha	Aligned (intransitive)	36	left	central	-0.710879
-0.5	alpha	Aligned (intransitive)	36	left	posterior	-0.29957
-0.5	alpha	Aligned (intransitive)	36	mid	frontal	-0.30016
-0.5	alpha	Aligned (intransitive)	36	mid	central	-0.332135
-0.5	alpha	Aligned (intransitive)	36	mid	posterior	-0.420912
-0.5	alpha	Aligned (intransitive)	36	right	frontal	0.0820222
-0.5	alpha	Aligned (intransitive)	36	right	central	-0.623141
-0.5	alpha	Aligned (intransitive)	36	right	posterior	-0.852014
-0.5	alpha	Aligned (intransitive)	38	left	frontal	-0.137226
-0.5	alpha	Aligned (intransitive)	38	left	central	-0.530495
-0.5	alpha	Aligned (intransitive)	38	left	posterior	-0.72639
-0.5	alpha	Aligned (intransitive)	38	mid	frontal	0.0382725
-0.5	alpha	Aligned (intransitive)	38	mid	central	-0.0764529
-0.5	alpha	Aligned (intransitive)	38	mid	posterior	-0.655741
-0.5	alpha	Aligned (intransitive)	38	right	frontal	-0.086049
-0.5	alpha	Aligned (intransitive)	38	right	central	-0.505354
-0.5	alpha	Aligned (intransitive)	38	right	posterior	-0.316118
-0.5	alpha	Aligned (intransitive)	4	left	frontal	0.0116649
-0.5	alpha	Aligned (intransitive)	4	left	central	0.301046
-0.5	alpha	Aligned (intransitive)	4	left	posterior	0.0345619
-0.5	alpha	Aligned (intransitive)	4	mid	frontal	-0.00485039
-0.5	alpha	Aligned (intransitive)	4	mid	central	-0.102968
-0.5	alpha	Aligned (intransitive)	4	mid	posterior	0.367147
-0.5	alpha	Aligned (intransitive)	4	right	frontal	-0.144997
-0.5	alpha	Aligned (intransitive)	4	right	central	0.35595
-0.5	alpha	Aligned (intransitive)	4	right	posterior	-0.0946334
-0.5	alpha	Aligned (intransitive)	40	left	frontal	0.319861
-0.5	alpha	Aligned (intransitive)	40	left	central	-0.438179
-0.5	alpha	Aligned (intransitive)	40	left	posterior	-0.328557
-0.5	alpha	Aligned (intransitive)	40	mid	frontal	0.432705
-0.5	alpha	Aligned (intransitive)	40	mid	central	-0.536482
-0.5	alpha	Aligned (intransitive)	40	mid	posterior	-0.61805
-0.5	alpha	Aligned (intransitive)	40	right	frontal	0.291245
-0.5	alpha	Aligned (intransitive)	40	right	central	-0.404651
-0.5	alpha	Aligned (intransitive)	40	right	posterior	-0.342083
-0.5	alpha	Aligned (intransitive)	42	left	frontal	-0.232108
-0.5	alpha	Aligned (intransitive)	42	left	central	0.197076
-0.5	alpha	Aligned (intransitive)	42	left	posterior	0.118159
-0.5	alpha	Aligned (intransitive)	42	mid	frontal	-0.52368
-0.5	alpha	Aligned (intransitive)	42	mid	central	-0.27291
-0.5	alpha	Aligned (intransitive)	42	mid	posterior	0.300025
-0.5	alpha	Aligned (intransitive)	42	right	frontal	-0.265344
-0.5	alpha	Aligned (intransitive)	42	right	central	0.0156103
-0.5	alpha	Aligned (intransitive)	42	right	posterior	0.261959
-0.5	alpha	Aligned (intransitive)	44	left	frontal	-0.244324
-0.5	alpha	Aligned (intransitive)	44	left	central	0.14844
-0.5	alpha	Aligned (intransitive)	44	left	posterior	-0.332252
-0.5	alpha	Aligned (intransitive)	44	mid	frontal	0.13438
-0.5	alpha	Aligned (intransitive)	44	mid	central	0.489585
-0.5	alpha	Aligned (intransitive)	44	mid	posterior	0.106552
-0.5	alpha	Aligned (intransitive)	44	right	frontal	0.216708
-0.5	alpha	Aligned (intransitive)	44	right	central	0.582145
-0.5	alpha	Aligned (intransitive)	44	right	posterior	0.299787
-0.5	alpha	Aligned (intransitive)	46	left	frontal	0.109192
-0.5	alpha	Aligned (intransitive)	46	left	central	0.37816
-0.5	alpha	Aligned (intransitive)	46	left	posterior	0.127414
-0.5	alpha	Aligned (intransitive)	46	mid	frontal	-0.424446
-0.5	alpha	Aligned (intransitive)	46	mid	central	0.0990281
-0.5	alpha	Aligned (intransitive)	46	mid	posterior	0.366535
-0.5	alpha	Aligned (intransitive)	46	right	frontal	-0.0930304
-0.5	alpha	Aligned (intransitive)	46	right	central	0.0334442
-0.5	alpha	Aligned (intransitive)	46	right	posterior	0.400329
-0.5	alpha	Aligned (intransitive)	48	left	frontal	-0.0720347
-0.5	alpha	Aligned (intransitive)	48	left	central	-0.32394
-0.5	alpha	Aligned (intransitive)	48	left	posterior	-0.409232
-0.5	alpha	Aligned (intransitive)	48	mid	frontal	-0.0290296
-0.5	alpha	Aligned (intransitive)	48	mid	central	-0.261357
-0.5	alpha	Aligned (intransitive)	48	mid	posterior	-0.525369
-0.5	alpha	Aligned (intransitive)	48	right	frontal	-0.292195
-0.5	alpha	Aligned (intransitive)	48	right	central	-0.299651
-0.5	alpha	Aligned (intransitive)	48	right	posterior	0.0346778
-0.5	alpha	Aligned (intransitive)	50	left	frontal	-0.208559
-0.5	alpha	Aligned (intransitive)	50	left	central	0.220785
-0.5	alpha	Aligned (intransitive)	50	left	posterior	-0.246756
-0.5	alpha	Aligned (intransitive)	50	mid	frontal	-0.480536
-0.5	alpha	Aligned (intransitive)	50	mid	central	-0.155283
-0.5	alpha	Aligned (intransitive)	50	mid	posterior	-0.0667062
-0.5	alpha	Aligned (intransitive)	50	right	frontal	-0.463769
-0.5	alpha	Aligned (intransitive)	50	right	central	0.0390219
-0.5	alpha	Aligned (intransitive)	50	right	posterior	-0.528535
-0.5	alpha	Aligned (intransitive)	6	left	frontal	-0.235617
-0.5	alpha	Aligned (intransitive)	6	left	central	-0.184737
-0.5	alpha	Aligned (intransitive)	6	left	posterior	0.224859
-0.5	alpha	Aligned (intransitive)	6	mid	frontal	-0.357046
-0.5	alpha	Aligned (intransitive)	6	mid	central	-0.467144
-0.5	alpha	Aligned (intransitive)	6	mid	posterior	-0.388761
-0.5	alpha	Aligned (intransitive)	6	right	frontal	-0.4578
-0.5	alpha	Aligned (intransitive)	6	right	central	-0.853196
-0.5	alpha	Aligned (intransitive)	6	right	posterior	-1.02331
-0.5	alpha	Aligned (intransitive)	8	left	frontal	-0.278022
-0.5	alpha	Aligned (intransitive)	8	left	central	0.159142
-0.5	alpha	Aligned (intransitive)	8	left	posterior	-0.232968
-0.5	alpha	Aligned (intransitive)	8	mid	frontal	-0.238313
-0.5	alpha	Aligned (intransitive)	8	mid	central	0.167925
-0.5	alpha	Aligned (intransitive)	8	mid	posterior	-0.115863
-0.5	alpha	Aligned (intransitive)	8	right	frontal	-0.115969
-0.5	alpha	Aligned (intransitive)	8	right	central	0.0762229
-0.5	alpha	Aligned (intransitive)	8	right	posterior	-0.058237
-0.5	alpha	Non-aligned (intransitive)	1	left	frontal	-0.260197
-0.5	alpha	Non-aligned (intransitive)	1	left	central	0.0949226
-0.5	alpha	Non-aligned (intransitive)	1	left	posterior	0.00563608
-0.5	alpha	Non-aligned (intransitive)	1	mid	frontal	-0.132611
-0.5	alpha	Non-aligned (intransitive)	1	mid	central	-0.151178
-0.5	alpha	Non-aligned (intransitive)	1	mid	posterior	-0.384081
-0.5	alpha	Non-aligned (intransitive)	1	right	frontal	0.100519
-0.5	alpha	Non-aligned (intransitive)	1	right	central	-0.187297
-0.5	alpha	Non-aligned (intransitive)	1	right	posterior	-0.219048
-0.5	alpha	Non-aligned (intransitive)	11	left	frontal	-0.0251011
-0.5	alpha	Non-aligned (intransitive)	11	left	central	0.109457
-0.5	alpha	Non-aligned (intransitive)	11	left	posterior	0.0581636
-0.5	alpha	Non-aligned (intransitive)	11	mid	frontal	-0.786749
-0.5	alpha	Non-aligned (intransitive)	11	mid	central	-0.345173
-0.5	alpha	Non-aligned (intransitive)	11	mid	posterior	-0.227992
-0.5	alpha	Non-aligned (intransitive)	11	right	frontal	-0.689433
-0.5	alpha	Non-aligned (intransitive)	11	right	central	-0.515909
-0.5	alpha	Non-aligned (intransitive)	11	right	posterior	-0.325157
-0.5	alpha	Non-aligned (intransitive)	13	left	frontal	-0.0771646
-0.5	alpha	Non-aligned (intransitive)	13	left	central	0.14202
-0.5	alpha	Non-aligned (intransitive)	13	left	posterior	0.0949394
-0.5	alpha	Non-aligned (intransitive)	13	mid	frontal	-0.266519
-0.5	alpha	Non-aligned (intransitive)	13	mid	central	-0.0081049
-0.5	alpha	Non-aligned (intransitive)	13	mid	posterior	0.540381
-0.5	alpha	Non-aligned (intransitive)	13	right	frontal	-0.00983462
-0.5	alpha	Non-aligned (intransitive)	13	right	central	0.00470061
-0.5	alpha	Non-aligned (intransitive)	13	right	posterior	0.199058
-0.5	alpha	Non-aligned (intransitive)	15	left	frontal	-0.0328657
-0.5	alpha	Non-aligned (intransitive)	15	left	central	0.360957
-0.5	alpha	Non-aligned (intransitive)	15	left	posterior	-0.0866267
-0.5	alpha	Non-aligned (intransitive)	15	mid	frontal	-0.1789
-0.5	alpha	Non-aligned (intransitive)	15	mid	central	-0.278963
-0.5	alpha	Non-aligned (intransitive)	15	mid	posterior	-0.34307
-0.5	alpha	Non-aligned (intransitive)	15	right	frontal	-0.0861531
-0.5	alpha	Non-aligned (intransitive)	15	right	central	-0.0105949
-0.5	alpha	Non-aligned (intransitive)	15	right	posterior	-0.975198
-0.5	alpha	Non-aligned (intransitive)	17	left	frontal	0.349889
-0.5	alpha	Non-aligned (intransitive)	17	left	central	-0.081772
-0.5	alpha	Non-aligned (intransitive)	17	left	posterior	0.786606
-0.5	alpha	Non-aligned (intransitive)	17	mid	frontal	-0.135803
-0.5	alpha	Non-aligned (intransitive)	17	mid	central	-0.00186886
-0.5	alpha	Non-aligned (intransitive)	17	mid	posterior	0.904502
-0.5	alpha	Non-aligned (intransitive)	17	right	frontal	-0.388581
-0.5	alpha	Non-aligned (intransitive)	17	right	central	0.240187
-0.5	alpha	Non-aligned (intransitive)	17	right	posterior	1.465
-0.5	alpha	Non-aligned (intransitive)	19	left	frontal	0.517496
-0.5	alpha	Non-aligned (intransitive)	19	left	central	0.277911
-0.5	alpha	Non-aligned (intransitive)	19	left	posterior	0.0123891
-0.5	alpha	Non-aligned (intransitive)	19	mid	frontal	0.315731
-0.5	alpha	Non-aligned (intransitive)	19	mid	central	0.47223
-0.5	alpha	Non-aligned (intransitive)	19	mid	posterior	-0.108851
-0.5	alpha	Non-aligned (intransitive)	19	right	frontal	0.393081
-0.5	alpha	Non-aligned (intransitive)	19	right	central	0.138991
-0.5	alpha	Non-aligned (intransitive)	19	right	posterior	0.156508
-0.5	alpha	Non-aligned (intransitive)	21	left	frontal	0.030582
-0.5	alpha	Non-aligned (intransitive)	21	left	central	0.325621
-0.5	alpha	Non-aligned (intransitive)	21	left	posterior	0.429216
-0.5	alpha	Non-aligned (intransitive)	21	mid	frontal	0.220633
-0.5	alpha	Non-aligned (intransitive)	21	mid	central	0.226491
-0.5	alpha	Non-aligned (intransitive)	21	mid	posterior	0.336255
-0.5	alpha	Non-aligned (intransitive)	21	right	frontal	0.228615
-0.5	alpha	Non-aligned (intransitive)	21	right	central	0.396126
-0.5	alpha	Non-aligned (intransitive)	21	right	posterior	0.236535
-0.5	alpha	Non-aligned (intransitive)	23	left	frontal	0.0754188
-0.5	alpha	Non-aligned (intransitive)	23	left	central	0.806201
-0.5	alpha	Non-aligned (intransitive)	23	left	posterior	0.564484
-0.5	alpha	Non-aligned (intransitive)	23	mid	frontal	-0.772033
-0.5	alpha	Non-aligned (intransitive)	23	mid	central	0.408888
-0.5	alpha	Non-aligned (intransitive)	23	mid	posterior	0.0836769
-0.5	alpha	Non-aligned (intransitive)	23	right	frontal	-0.191089
-0.5	alpha	Non-aligned (intransitive)	23	right	central	0.401045
-0.5	alpha	Non-aligned (intransitive)	23	right	posterior	-0.0980865
-0.5	alpha	Non-aligned (intransitive)	24	left	frontal	-0.99463
-0.5	alpha	Non-aligned (intransitive)	24	left	central	0.0131692
-0.5	alpha	Non-aligned (intransitive)	24	left	posterior	-0.474409
-0.5	alpha	Non-aligned (intransitive)	24	mid	frontal	-3.56279
-0.5	alpha	Non-aligned (intransitive)	24	mid	central	-1.23918
-0.5	alpha	Non-aligned (intransitive)	24	mid	posterior	0.372782
-0.5	alpha	Non-aligned (intransitive)	24	right	frontal	-2.22206
-0.5	alpha	Non-aligned (intransitive)	24	right	central	-1.3759
-0.5	alpha	Non-aligned (intransitive)	24	right	posterior	-0.171915
-0.5	alpha	Non-aligned (intransitive)	25	left	frontal	-1.00055
-0.5	alpha	Non-aligned (intransitive)	25	left	central	-0.47272
-0.5	alpha	Non-aligned (intransitive)	25	left	posterior	-0.304998
-0.5	alpha	Non-aligned (intransitive)	25	mid	frontal	-1.32581
-0.5	alpha	Non-aligned (intransitive)	25	mid	central	-1.56237
-0.5	alpha	Non-aligned (intransitive)	25	mid	posterior	0.140027
-0.5	alpha	Non-aligned (intransitive)	25	right	frontal	-1.08376
-0.5	alpha	Non-aligned (intransitive)	25	right	central	-0.594251
-0.5	alpha	Non-aligned (intransitive)	25	right	posterior	-0.273791
-0.5	alpha	Non-aligned (intransitive)	27	left	frontal	0.292743
-0.5	alpha	Non-aligned (intransitive)	27	left	central	0.1673
-0.5	alpha	Non-aligned (intransitive)	27	left	posterior	1.41681
-0.5	alpha	Non-aligned (intransitive)	27	mid	frontal	0.202082
-0.5	alpha	Non-aligned (intransitive)	27	mid	central	0.727497
-0.5	alpha	Non-aligned (intransitive)	27	mid	posterior	1.59268
-0.5	alpha	Non-aligned (intransitive)	27	right	frontal	0.314707
-0.5	alpha	Non-aligned (intransitive)	27	right	central	0.498728
-0.5	alpha	Non-aligned (intransitive)	27	right	posterior	1.5443
-0.5	alpha	Non-aligned (intransitive)	29	left	frontal	-1.10653
-0.5	alpha	Non-aligned (intransitive)	29	left	central	-0.595089
-0.5	alpha	Non-aligned (intransitive)	29	left	posterior	0.218088
-0.5	alpha	Non-aligned (intransitive)	29	mid	frontal	-0.506437
-0.5	alpha	Non-aligned (intransitive)	29	mid	central	-0.810494
-0.5	alpha	Non-aligned (intransitive)	29	mid	posterior	0.483647
-0.5	alpha	Non-aligned (intransitive)	29	right	frontal	0.193077
-0.5	alpha	Non-aligned (intransitive)	29	right	central	0.167865
-0.5	alpha	Non-aligned (intransitive)	29	right	posterior	0.444987
-0.5	alpha	Non-aligned (intransitive)	3	left	frontal	-0.112871
-0.5	alpha	Non-aligned (intransitive)	3	left	central	-0.275787
-0.5	alpha	Non-aligned (intransitive)	3	left	posterior	-0.0953205
-0.5	alpha	Non-aligned (intransitive)	3	mid	frontal	-0.144068
-0.5	alpha	Non-aligned (intransitive)	3	mid	central	-0.0605488
-0.5	alpha	Non-aligned (intransitive)	3	mid	posterior	-0.336672
-0.5	alpha	Non-aligned (intransitive)	3	right	frontal	0.0309392
-0.5	alpha	Non-aligned (intransitive)	3	right	central	-0.374447
-0.5	alpha	Non-aligned (intransitive)	3	right	posterior	-0.166603
-0.5	alpha	Non-aligned (intransitive)	31	left	frontal	-0.37901
-0.5	alpha	Non-aligned (intransitive)	31	left	central	-0.320323
-0.5	alpha	Non-aligned (intransitive)	31	left	posterior	0.232313
-0.5	alpha	Non-aligned (intransitive)	31	mid	frontal	-0.0497998
-0.5	alpha	Non-aligned (intransitive)	31	mid	central	0.0943997
-0.5	alpha	Non-aligned (intransitive)	31	mid	posterior	0.4322
-0.5	alpha	Non-aligned (intransitive)	31	right	frontal	0.441184
-0.5	alpha	Non-aligned (intransitive)	31	right	central	0.789044
-0.5	alpha	Non-aligned (intransitive)	31	right	posterior	0.351338
-0.5	alpha	Non-aligned (intransitive)	32	left	frontal	-6.40015
-0.5	alpha	Non-aligned (intransitive)	32	left	central	-3.2374
-0.5	alpha	Non-aligned (intransitive)	32	left	posterior	-1.29976
-0.5	alpha	Non-aligned (intransitive)	32	mid	frontal	-0.550127
-0.5	alpha	Non-aligned (intransitive)	32	mid	central	-1.03553
-0.5	alpha	Non-aligned (intransitive)	32	mid	posterior	-1.31581
-0.5	alpha	Non-aligned (intransitive)	32	right	frontal	2.0236
-0.5	alpha	Non-aligned (intransitive)	32	right	central	-0.153212
-0.5	alpha	Non-aligned (intransitive)	32	right	posterior	1.23626
-0.5	alpha	Non-aligned (intransitive)	33	left	frontal	-0.00969382
-0.5	alpha	Non-aligned (intransitive)	33	left	central	0.245713
-0.5	alpha	Non-aligned (intransitive)	33	left	posterior	0.357826
-0.5	alpha	Non-aligned (intransitive)	33	mid	frontal	0.13494
-0.5	alpha	Non-aligned (intransitive)	33	mid	central	0.0372922
-0.5	alpha	Non-aligned (intransitive)	33	mid	posterior	-0.0183025
-0.5	alpha	Non-aligned (intransitive)	33	right	frontal	-0.200329
-0.5	alpha	Non-aligned (intransitive)	33	right	central	-0.151362
-0.5	alpha	Non-aligned (intransitive)	33	right	posterior	-0.308105
-0.5	alpha	Non-aligned (intransitive)	35	left	frontal	-0.471599
-0.5	alpha	Non-aligned (intransitive)	35	left	central	-0.777514
-0.5	alpha	Non-aligned (intransitive)	35	left	posterior	-0.988344
-0.5	alpha	Non-aligned (intransitive)	35	mid	frontal	-0.588325
-0.5	alpha	Non-aligned (intransitive)	35	mid	central	-0.713113
-0.5	alpha	Non-aligned (intransitive)	35	mid	posterior	-1.07908
-0.5	alpha	Non-aligned (intransitive)	35	right	frontal	-0.505129
-0.5	alpha	Non-aligned (intransitive)	35	right	central	-0.598856
-0.5	alpha	Non-aligned (intransitive)	35	right	posterior	-0.318605
-0.5	alpha	Non-aligned (intransitive)	37	left	frontal	0.135689
-0.5	alpha	Non-aligned (intransitive)	37	left	central	0.334982
-0.5	alpha	Non-aligned (intransitive)	37	left	posterior	-0.138348
-0.5	alpha	Non-aligned (intransitive)	37	mid	frontal	0.114177
-0.5	alpha	Non-aligned (intransitive)	37	mid	central	0.517917
-0.5	alpha	Non-aligned (intransitive)	37	mid	posterior	1.01327
-0.5	alpha	Non-aligned (intransitive)	37	right	frontal	0.278264
-0.5	alpha	Non-aligned (intransitive)	37	right	central	0.466089
-0.5	alpha	Non-aligned (intransitive)	37	right	posterior	0.499788
-0.5	alpha	Non-aligned (intransitive)	39	left	frontal	-0.355601
-0.5	alpha	Non-aligned (intransitive)	39	left	central	-0.0857101
-0.5	alpha	Non-aligned (intransitive)	39	left	posterior	-0.152748
-0.5	alpha	Non-aligned (intransitive)	39	mid	frontal	-0.707538
-0.5	alpha	Non-aligned (intransitive)	39	mid	central	-0.27312
-0.5	alpha	Non-aligned (intransitive)	39	mid	posterior	0.175663
-0.5	alpha	Non-aligned (intransitive)	39	right	frontal	-0.538768
-0.5	alpha	Non-aligned (intransitive)	39	right	central	-0.0355926
-0.5	alpha	Non-aligned (intransitive)	39	right	posterior	0.257481
-0.5	alpha	Non-aligned (intransitive)	41	left	frontal	0.000855315
-0.5	alpha	Non-aligned (intransitive)	41	left	central	-0.182189
-0.5	alpha	Non-aligned (intransitive)	41	left	posterior	-0.776718
-0.5	alpha	Non-aligned (intransitive)	41	mid	frontal	-0.150523
-0.5	alpha	Non-aligned (intransitive)	41	mid	central	-0.339364
-0.5	alpha	Non-aligned (intransitive)	41	mid	posterior	-0.763829
-0.5	alpha	Non-aligned (intransitive)	41	right	frontal	-0.0449472
-0.5	alpha	Non-aligned (intransitive)	41	right	central	-0.0831464
-0.5	alpha	Non-aligned (intransitive)	41	right	posterior	-0.661972
-0.5	alpha	Non-aligned (intransitive)	43	left	frontal	-0.122565
-0.5	alpha	Non-aligned (intransitive)	43	left	central	-0.107496
-0.5	alpha	Non-aligned (intransitive)	43	left	posterior	-0.0639953
-0.5	alpha	Non-aligned (intransitive)	43	mid	frontal	-0.594033
-0.5	alpha	Non-aligned (intransitive)	43	mid	central	-0.577095
-0.5	alpha	Non-aligned (intransitive)	43	mid	posterior	-0.326802
-0.5	alpha	Non-aligned (intransitive)	43	right	frontal	-0.164967
-0.5	alpha	Non-aligned (intransitive)	43	right	central	-0.218492
-0.5	alpha	Non-aligned (intransitive)	43	right	posterior	-0.0634986
-0.5	alpha	Non-aligned (intransitive)	45	left	frontal	0.208018
-0.5	alpha	Non-aligned (intransitive)	45	left	central	-0.0472251
-0.5	alpha	Non-aligned (intransitive)	45	left	posterior	0.221603
-0.5	alpha	Non-aligned (intransitive)	45	mid	frontal	0.165009
-0.5	alpha	Non-aligned (intransitive)	45	mid	central	0.113598
-0.5	alpha	Non-aligned (intransitive)	45	mid	posterior	0.160751
-0.5	alpha	Non-aligned (intransitive)	45	right	frontal	0.256527
-0.5	alpha	Non-aligned (intransitive)	45	right	central	0.647113
-0.5	alpha	Non-aligned (intransitive)	45	right	posterior	0.338247
-0.5	alpha	Non-aligned (intransitive)	47	left	frontal	-0.207906
-0.5	alpha	Non-aligned (intransitive)	47	left	central	-0.36395
-0.5	alpha	Non-aligned (intransitive)	47	left	posterior	-0.469471
-0.5	alpha	Non-aligned (intransitive)	47	mid	frontal	0.120438
-0.5	alpha	Non-aligned (intransitive)	47	mid	central	-0.339521
-0.5	alpha	Non-aligned (intransitive)	47	mid	posterior	-0.645584
-0.5	alpha	Non-aligned (intransitive)	47	right	frontal	-0.180029
-0.5	alpha	Non-aligned (intransitive)	47	right	central	0.0741153
-0.5	alpha	Non-aligned (intransitive)	47	right	posterior	0.399756
-0.5	alpha	Non-aligned (intransitive)	49	left	frontal	-0.0951271
-0.5	alpha	Non-aligned (intransitive)	49	left	central	-0.0499554
-0.5	alpha	Non-aligned (intransitive)	49	left	posterior	-0.10733
-0.5	alpha	Non-aligned (intransitive)	49	mid	frontal	-0.530744
-0.5	alpha	Non-aligned (intransitive)	49	mid	central	-0.213199
-0.5	alpha	Non-aligned (intransitive)	49	mid	posterior	-0.0759885
-0.5	alpha	Non-aligned (intransitive)	49	right	frontal	-0.500662
-0.5	alpha	Non-aligned (intransitive)	49	right	central	-0.196356
-0.5	alpha	Non-aligned (intransitive)	49	right	posterior	-0.115217
-0.5	alpha	Non-aligned (intransitive)	5	left	frontal	0.117681
-0.5	alpha	Non-aligned (intransitive)	5	left	central	0.240966
-0.5	alpha	Non-aligned (intransitive)	5	left	posterior	0.352934
-0.5	alpha	Non-aligned (intransitive)	5	mid	frontal	-0.150387
-0.5	alpha	Non-aligned (intransitive)	5	mid	central	-0.249862
-0.5	alpha	Non-aligned (intransitive)	5	mid	posterior	0.884775
-0.5	alpha	Non-aligned (intransitive)	5	right	frontal	0.100414
-0.5	alpha	Non-aligned (intransitive)	5	right	central	-0.509726
-0.5	alpha	Non-aligned (intransitive)	5	right	posterior	-0.280837
-0.5	alpha	Non-aligned (intransitive)	50	left	frontal	2.87873
-0.5	alpha	Non-aligned (intransitive)	50	left	central	4.07992
-0.5	alpha	Non-aligned (intransitive)	50	left	posterior	3.88839
-0.5	alpha	Non-aligned (intransitive)	50	mid	frontal	4.40726
-0.5	alpha	Non-aligned (intransitive)	50	mid	central	1.0799
-0.5	alpha	Non-aligned (intransitive)	50	mid	posterior	3.37935
-0.5	alpha	Non-aligned (intransitive)	50	right	frontal	3.06133
-0.5	alpha	Non-aligned (intransitive)	50	right	central	4.99116
-0.5	alpha	Non-aligned (intransitive)	50	right	posterior	-0.875163
-0.5	alpha	Non-aligned (intransitive)	7	left	frontal	-0.478364
-0.5	alpha	Non-aligned (intransitive)	7	left	central	-0.171685
-0.5	alpha	Non-aligned (intransitive)	7	left	posterior	-0.0230846
-0.5	alpha	Non-aligned (intransitive)	7	mid	frontal	-0.632374
-0.5	alpha	Non-aligned (intransitive)	7	mid	central	-0.279079
-0.5	alpha	Non-aligned (intransitive)	7	mid	posterior	-0.357879
-0.5	alpha	Non-aligned (intransitive)	7	right	frontal	-0.381075
-0.5	alpha	Non-aligned (intransitive)	7	right	central	-0.0430817
-0.5	alpha	Non-aligned (intransitive)	7	right	posterior	-0.0482342
-0.5	alpha	Non-aligned (intransitive)	9	left	frontal	-0.402965
-0.5	alpha	Non-aligned (intransitive)	9	left	central	0.387401
-0.5	alpha	Non-aligned (intransitive)	9	left	posterior	0.536318
-0.5	alpha	Non-aligned (intransitive)	9	mid	frontal	0.111945
-0.5	alpha	Non-aligned (intransitive)	9	mid	central	-0.0965403
-0.5	alpha	Non-aligned (intransitive)	9	mid	posterior	0.235563
-0.5	alpha	Non-aligned (intransitive)	9	right	frontal	0.310251
-0.5	alpha	Non-aligned (intransitive)	9	right	central	0.627707
-0.5	alpha	Non-aligned (intransitive)	9	right	posterior	0.311831
-0.4	alpha	Aligned (transitive)	10	left	frontal	-0.0389311
-0.4	alpha	Aligned (transitive)	10	left	central	-0.0764336
-0.4	alpha	Aligned (transitive)	10	left	posterior	0.468149
-0.4	alpha	Aligned (transitive)	10	mid	frontal	0.108664
-0.4	alpha	Aligned (transitive)	10	mid	central	0.170941
-0.4	alpha	Aligned (transitive)	10	mid	posterior	0.602773
-0.4	alpha	Aligned (transitive)	10	right	frontal	0.0632552
-0.4	alpha	Aligned (transitive)	10	right	central	-0.262002
-0.4	alpha	Aligned (transitive)	10	right	posterior	0.404819
-0.4	alpha	Aligned (transitive)	12	left	frontal	-0.00885533
-0.4	alpha	Aligned (transitive)	12	left	central	0.113285
-0.4	alpha	Aligned (transitive)	12	left	posterior	0.342923
-0.4	alpha	Aligned (transitive)	12	mid	frontal	-0.61353
-0.4	alpha	Aligned (transitive)	12	mid	central	-0.240619
-0.4	alpha	Aligned (transitive)	12	mid	posterior	0.540914
-0.4	alpha	Aligned (transitive)	12	right	frontal	-0.968621
-0.4	alpha	Aligned (transitive)	12	right	central	0.00449811
-0.4	alpha	Aligned (transitive)	12	right	posterior	0.208331
-0.4	alpha	Aligned (transitive)	14	left	frontal	-0.622431
-0.4	alpha	Aligned (transitive)	14	left	central	-0.212218
-0.4	alpha	Aligned (transitive)	14	left	posterior	-0.19066
-0.4	alpha	Aligned (transitive)	14	mid	frontal	-1.01669
-0.4	alpha	Aligned (transitive)	14	mid	central	-0.632694
-0.4	alpha	Aligned (transitive)	14	mid	posterior	-0.405018
-0.4	alpha	Aligned (transitive)	14	right	frontal	-0.445237
-0.4	alpha	Aligned (transitive)	14	right	central	-0.160128
-0.4	alpha	Aligned (transitive)	14	right	posterior	-0.156461
-0.4	alpha	Aligned (transitive)	16	left	frontal	-0.927212
-0.4	alpha	Aligned (transitive)	16	left	central	-0.822596
-0.4	alpha	Aligned (transitive)	16	left	posterior	-0.574263
-0.4	alpha	Aligned (transitive)	16	mid	frontal	-1.32447
-0.4	alpha	Aligned (transitive)	16	mid	central	-1.1442
-0.4	alpha	Aligned (transitive)	16	mid	posterior	-0.655527
-0.4	alpha	Aligned (transitive)	16	right	frontal	-0.514548
-0.4	alpha	Aligned (transitive)	16	right	central	-0.794178
-0.4	alpha	Aligned (transitive)	16	right	posterior	-0.416916
-0.4	alpha	Aligned (transitive)	18	left	frontal	0.115797
-0.4	alpha	Aligned (transitive)	18	left	central	-0.293488
-0.4	alpha	Aligned (transitive)	18	left	posterior	-0.649475
-0.4	alpha	Aligned (transitive)	18	mid	frontal	-0.192379
-0.4	alpha	Aligned (transitive)	18	mid	central	-0.503448
-0.4	alpha	Aligned (transitive)	18	mid	posterior	-0.993419
-0.4	alpha	Aligned (transitive)	18	right	frontal	-0.417378
-0.4	alpha	Aligned (transitive)	18	right	central	-0.756625
-0.4	alpha	Aligned (transitive)	18	right	posterior	-0.620986
-0.4	alpha	Aligned (transitive)	2	left	frontal	0.194685
-0.4	alpha	Aligned (transitive)	2	left	central	-0.0711469
-0.4	alpha	Aligned (transitive)	2	left	posterior	0.0501197
-0.4	alpha	Aligned (transitive)	2	mid	frontal	-0.451657
-0.4	alpha	Aligned (transitive)	2	mid	central	-0.350406
-0.4	alpha	Aligned (transitive)	2	mid	posterior	-0.76467
-0.4	alpha	Aligned (transitive)	2	right	frontal	-0.0670078
-0.4	alpha	Aligned (transitive)	2	right	central	-0.496972
-0.4	alpha	Aligned (transitive)	2	right	posterior	-0.749521
-0.4	alpha	Aligned (transitive)	20	left	frontal	0.0566727
-0.4	alpha	Aligned (transitive)	20	left	central	-0.45979
-0.4	alpha	Aligned (transitive)	20	left	posterior	-1.31241
-0.4	alpha	Aligned (transitive)	20	mid	frontal	0.548275
-0.4	alpha	Aligned (transitive)	20	mid	central	0.0808175
-0.4	alpha	Aligned (transitive)	20	mid	posterior	0.558193
-0.4	alpha	Aligned (transitive)	20	right	frontal	-0.285313
-0.4	alpha	Aligned (transitive)	20	right	central	0.59266
-0.4	alpha	Aligned (transitive)	20	right	posterior	-0.204775
-0.4	alpha	Aligned (transitive)	22	left	frontal	-0.713704
-0.4	alpha	Aligned (transitive)	22	left	central	-0.410115
-0.4	alpha	Aligned (transitive)	22	left	posterior	-0.0289022
-0.4	alpha	Aligned (transitive)	22	mid	frontal	-0.765626
-0.4	alpha	Aligned (transitive)	22	mid	central	-0.298384
-0.4	alpha	Aligned (transitive)	22	mid	posterior	-0.268953
-0.4	alpha	Aligned (transitive)	22	right	frontal	-0.408863
-0.4	alpha	Aligned (transitive)	22	right	central	-0.157533
-0.4	alpha	Aligned (transitive)	22	right	posterior	-0.18371
-0.4	alpha	Aligned (transitive)	24	left	frontal	-0.666837
-0.4	alpha	Aligned (transitive)	24	left	central	-0.151085
-0.4	alpha	Aligned (transitive)	24	left	posterior	-0.674501
-0.4	alpha	Aligned (transitive)	24	mid	frontal	-0.280899
-0.4	alpha	Aligned (transitive)	24	mid	central	-0.0132275
-0.4	alpha	Aligned (transitive)	24	mid	posterior	-0.200753
-0.4	alpha	Aligned (transitive)	24	right	frontal	-0.185093
-0.4	alpha	Aligned (transitive)	24	right	central	0.0742292
-0.4	alpha	Aligned (transitive)	24	right	posterior	0.716932
-0.4	alpha	Aligned (transitive)	26	left	frontal	-0.590324
-0.4	alpha	Aligned (transitive)	26	left	central	-0.271869
-0.4	alpha	Aligned (transitive)	26	left	posterior	0.0508667
-0.4	alpha	Aligned (transitive)	26	mid	frontal	-0.585487
-0.4	alpha	Aligned (transitive)	26	mid	central	-0.275347
-0.4	alpha	Aligned (transitive)	26	mid	posterior	0.0974463
-0.4	alpha	Aligned (transitive)	26	right	frontal	-0.227878
-0.4	alpha	Aligned (transitive)	26	right	central	0.192323
-0.4	alpha	Aligned (transitive)	26	right	posterior	0.150637
[truncated: 14,220 more rows]

## Sheet: Fig 3C
Fig 3C: Fitted mean values (and standard errors) from regression trees, alpha band activity (terminal nodes are numbered from left to right)
time	sentence.type	value.mean	value.SE	TerminalNode	ROI
0	imperfective_intransitive	-0.215559	0.0369864	1	LF, MF, RF
0	imperfective_transitive	-0.192477	0.0418229	1	LF, MF, RF
0	perfective_intransitive	-0.153109	0.0406386	1	LF, MF, RF
0.1	imperfective_intransitive	0.299558	0.0404242	1	LF, MF, RF
0.1	imperfective_transitive	0.274725	0.0461265	1	LF, MF, RF
0.1	perfective_intransitive	0.149066	0.0458785	1	LF, MF, RF
0.2	imperfective_intransitive	0.287499	0.0429417	1	LF, MF, RF
0.2	imperfective_transitive	0.300586	0.0463188	1	LF, MF, RF
0.2	perfective_intransitive	0.283826	0.0470167	1	LF, MF, RF
0.3	imperfective_intransitive	0.200343	0.0449931	1	LF, MF, RF
0.3	imperfective_transitive	0.209031	0.047933	1	LF, MF, RF
0.3	perfective_intransitive	0.208487	0.0486338	1	LF, MF, RF
0.4	imperfective_intransitive	-0.386554	0.0460809	1	LF, MF, RF
0.4	imperfective_transitive	-0.363809	0.0499734	1	LF, MF, RF
0.4	perfective_intransitive	-0.252454	0.0491921	1	LF, MF, RF
0.5	imperfective_intransitive	-0.636205	0.0476278	1	LF, MF, RF
0.5	imperfective_transitive	-0.75068	0.0505899	1	LF, MF, RF
0.5	perfective_intransitive	-0.429138	0.0481721	1	LF, MF, RF
0.6	imperfective_intransitive	-0.641827	0.0480254	1	LF, MF, RF
0.6	imperfective_transitive	-0.791648	0.0506136	1	LF, MF, RF
0.6	perfective_intransitive	-0.499549	0.0470446	1	LF, MF, RF
0.7	imperfective_intransitive	-0.588591	0.0471954	1	LF, MF, RF
0.7	imperfective_transitive	-0.684118	0.052628	1	LF, MF, RF
0.7	perfective_intransitive	-0.469464	0.045765	1	LF, MF, RF
0.8	imperfective_intransitive	-0.494268	0.0478651	1	LF, MF, RF
0.8	imperfective_transitive	-0.598329	0.0536776	1	LF, MF, RF
0.8	perfective_intransitive	-0.478706	0.0471521	1	LF, MF, RF
0	perfective_transitive	-0.388111	0.0438887	2	LF, MF, RF
0.1	perfective_transitive	0.1186	0.0498694	2	LF, MF, RF
0.2	perfective_transitive	0.295726	0.0529363	2	LF, MF, RF
0.3	perfective_transitive	0.288544	0.0540777	2	LF, MF, RF
0.4	perfective_transitive	-0.231939	0.0523876	2	LF, MF, RF
0.5	perfective_transitive	-0.448396	0.0526286	2	LF, MF, RF
0.6	perfective_transitive	-0.327186	0.0527304	2	LF, MF, RF
0.7	perfective_transitive	-0.172569	0.052003	2	LF, MF, RF
0.8	perfective_transitive	-0.38795	0.0513442	2	LF, MF, RF
0	imperfective_intransitive	-0.149509	0.0371073	3	LC, MC, RC
0	imperfective_transitive	-0.202304	0.0415309	3	LC, MC, RC
0	perfective_intransitive	-0.0963587	0.0399799	3	LC, MC, RC
0.1	imperfective_intransitive	0.370362	0.039666	3	LC, MC, RC
0.1	imperfective_transitive	0.375379	0.0459135	3	LC, MC, RC
0.1	perfective_intransitive	0.327795	0.0454082	3	LC, MC, RC
0.2	imperfective_intransitive	0.306334	0.0421919	3	LC, MC, RC
0.2	imperfective_transitive	0.41376	0.0468559	3	LC, MC, RC
0.2	perfective_intransitive	0.406281	0.0478105	3	LC, MC, RC
0.3	imperfective_intransitive	0.257636	0.0462322	3	LC, MC, RC
0.3	imperfective_transitive	0.39204	0.0504773	3	LC, MC, RC
0.3	perfective_intransitive	0.26199	0.0499267	3	LC, MC, RC
0.4	imperfective_intransitive	-0.500036	0.0458218	3	LC, MC, RC
0.4	imperfective_transitive	-0.328335	0.0505919	3	LC, MC, RC
0.4	perfective_intransitive	-0.342505	0.0494105	3	LC, MC, RC
0.5	imperfective_intransitive	-0.965859	0.0474267	3	LC, MC, RC
0.5	imperfective_transitive	-0.93738	0.0521956	3	LC, MC, RC
0.5	perfective_intransitive	-0.582847	0.0506929	3	LC, MC, RC
0.6	imperfective_intransitive	-0.896529	0.0489863	3	LC, MC, RC
0.6	imperfective_transitive	-0.931578	0.0533312	3	LC, MC, RC
0.6	perfective_intransitive	-0.708344	0.0497024	3	LC, MC, RC
0.7	imperfective_intransitive	-0.87285	0.0489546	3	LC, MC, RC
0.7	imperfective_transitive	-0.92636	0.0541597	3	LC, MC, RC
0.7	perfective_intransitive	-0.778645	0.0477397	3	LC, MC, RC
0.8	imperfective_intransitive	-0.851702	0.050151	3	LC, MC, RC
0.8	imperfective_transitive	-0.95433	0.0542075	3	LC, MC, RC
0.8	perfective_intransitive	-0.854811	0.0483844	3	LC, MC, RC
0	imperfective_intransitive	-0.216567	0.0375477	4+5	LP, MP, RP
0	imperfective_transitive	-0.228826	0.0405565	4+5	LP, MP, RP
0	perfective_intransitive	-0.14598	0.0393842	4+5	LP, MP, RP
0.1	imperfective_intransitive	0.467023	0.0406943	4+5	LP, MP, RP
0.1	imperfective_transitive	0.600337	0.0455907	4+5	LP, MP, RP
0.1	perfective_intransitive	0.450948	0.0445954	4+5	LP, MP, RP
0.2	imperfective_intransitive	0.523199	0.0429675	4+5	LP, MP, RP
0.2	imperfective_transitive	0.734665	0.0481904	4+5	LP, MP, RP
0.2	perfective_intransitive	0.691794	0.0492203	4+5	LP, MP, RP
0.3	imperfective_intransitive	0.447125	0.0490717	4+5	LP, MP, RP
0.3	imperfective_transitive	0.60599	0.0530112	4+5	LP, MP, RP
0.3	perfective_intransitive	0.450164	0.0503527	4+5	LP, MP, RP
0.4	imperfective_intransitive	-0.253456	0.0495217	4+5	LP, MP, RP
0.4	imperfective_transitive	-0.204754	0.0541097	4+5	LP, MP, RP
0.4	perfective_intransitive	-0.113583	0.0498774	4+5	LP, MP, RP
0.5	imperfective_intransitive	-0.982369	0.0488213	4+5	LP, MP, RP
0.5	imperfective_transitive	-1.03075	0.0537308	4+5	LP, MP, RP
0.5	perfective_intransitive	-0.723195	0.0509353	4+5	LP, MP, RP
0.6	imperfective_intransitive	-1.02105	0.050389	4+5	LP, MP, RP
0.6	imperfective_transitive	-0.920248	0.0548722	4+5	LP, MP, RP
0.6	perfective_intransitive	-0.895352	0.0497975	4+5	LP, MP, RP
0.7	imperfective_intransitive	-1.13918	0.0489525	4+5	LP, MP, RP
0.7	imperfective_transitive	-0.887486	0.0535613	4+5	LP, MP, RP
0.7	perfective_intransitive	-0.972112	0.0490043	4+5	LP, MP, RP
0.8	imperfective_intransitive	-1.16254	0.0515598	4+5	LP, MP, RP
0.8	imperfective_transitive	-0.875039	0.0556901	4+5	LP, MP, RP
0.8	perfective_intransitive	-1.09665	0.0496195	4+5	LP, MP, RP
0	perfective_transitive	-0.181986	0.0310666	6	LC, MC, RC, LP, MP, RP
0.1	perfective_transitive	0.371261	0.0344747	6	LC, MC, RC, LP, MP, RP
0.2	perfective_transitive	0.622696	0.03893	6	LC, MC, RC, LP, MP, RP
0.3	perfective_transitive	0.471847	0.0392355	6	LC, MC, RC, LP, MP, RP
0.4	perfective_transitive	-0.118232	0.0384223	6	LC, MC, RC, LP, MP, RP
0.5	perfective_transitive	-0.481436	0.0390766	6	LC, MC, RC, LP, MP, RP
0.6	perfective_transitive	-0.491441	0.0385583	6	LC, MC, RC, LP, MP, RP
0.7	perfective_transitive	-0.528187	0.0381598	6	LC, MC, RC, LP, MP, RP
0.8	perfective_transitive	-0.619057	0.03774	6	LC, MC, RC, LP, MP, RP

## Sheet: Fig 3D
Fig 3D: t values for topoplots for alpha ERD
time (ms)	electrode	t
0	E1	2.1321
0	E2	1.7304
0	E3	0.9229
0	E4	1.0406
0	E5	1.6402
0	E6	1.3702
0	E7	2.1116
0	E9	1.5492
0	E10	1.5246
0	E11	1.7028
0	E12	2.2478
0	E13	1.6942
0	E15	1.6128
0	E16	1.5957
0	E18	1.5115
0	E19	1.7512
0	E20	1.8097
0	E22	2.0165
0	E23	1.1238
0	E24	1.9424
0	E26	2.7188
0	E27	1.9765
0	E28	1.8849
0	E29	2.43
0	E30	1.9277
0	E31	2.0029
0	E32	3.3569
0	E33	2.624
0	E34	3.6835
0	E35	2.2541
0	E36	1.7275
0	E37	1.6962
0	E38	2.8917
0	E39	2.2612
0	E40	1.9588
0	E41	2.7085
0	E42	0.7863
0	E43	3.1467
0	E44	2.9619
0	E45	1.7562
0	E46	1.3011
0	E47	1.4346
0	E48	2.592
0	E49	2.2901
0	E50	0.5468
0	E51	1.6455
0	E52	0.562
0	E53	0.7695
0	E54	1.0869
0	E55	1.4327
0	E56	0.6904
0	E58	-0.2281
0	E59	0.2684
0	E60	0.7667
0	E61	0.7742
0	E62	0.2774
0	E63	1.5387
0	E64	1.1338
0	E65	0.0308
0	E66	-0.9033
0	E67	-0.6506
0	E68	2.4564
0	E69	1.2517
0	E70	0.6116
0	E71	-0.1909
0	E72	0.0189
0	E73	2.6112
0	E74	1.5428
0	E75	0.5912
0	E76	-0.5573
0	E77	-0.6243
0	E78	0.6722
0	E79	1.2231
0	E80	1.8046
0	E81	1.9834
0	E82	1.325
0	E83	0.0979
0	E84	-0.3809
0	E85	-0.1106
0	E86	1.0125
0	E87	1.1355
0	E88	1.6643
0	E89	-0.1896
0	E90	0.1874
0	E91	0.2702
0	E92	0.9219
0	E93	1.0807
0	E94	0.2362
0	E95	0.4329
0	E96	1.1741
0	E97	1.1608
0	E98	1.438
0	E99	0.3742
0	E101	0.5187
0	E102	0.8708
0	E103	0.8893
0	E104	0.8636
0	E105	1.492
0	E106	1.794
0	E107	0.4534
0	E108	-0.7621
0	E109	0.4511
0	E110	1.4551
0	E111	1.0648
0	E112	1.3618
0	E113	1.4726
0	E114	0.2636
0	E115	0.2963
0	E116	0.4693
0	E117	0.6833
0	E118	1.1986
0	E119	0.158
0	E120	0.5937
0	E121	0.8457
0	E122	1.4207
0	E123	0.2345
0	E124	0.6076
0	Cz	1.2272
100	E1	0.5748
100	E2	0.6656
100	E3	0.8286
100	E4	0.5446
100	E5	0.6265
100	E6	0.3641
100	E7	0.7124
100	E9	0.8425
100	E10	0.0583
100	E11	0.4078
100	E12	0.3592
100	E13	0.5438
100	E15	-0.0808
100	E16	0.3784
100	E18	0.3811
100	E19	0.4897
100	E20	0.4652
100	E22	-0.1238
100	E23	0.4182
100	E24	0.8272
100	E26	0.8272
100	E27	0.3705
100	E28	0.4035
100	E29	-0.4863
100	E30	0.0537
100	E31	-0.5008
100	E32	1.8532
100	E33	1.2814
100	E34	0.9849
100	E35	0.6924
100	E36	-0.4104
100	E37	-0.5793
100	E38	1.1121
100	E39	0.0824
100	E40	0.6367
100	E41	-0.1623
100	E42	-0.5296
100	E43	0.8695
100	E44	0.9765
100	E45	0.5426
100	E46	-0.1211
100	E47	-0.5357
100	E48	-0.1869
100	E49	0.1224
100	E50	0.893
100	E51	-0.1868
100	E52	-0.7825
100	E53	-0.6889
100	E54	-1.2337
100	E55	-0.6883
100	E56	0.4452
100	E58	0.0617
100	E59	-0.6729
100	E60	-1.2596
100	E61	-1.3567
100	E62	-1.8733
100	E63	1.9112
100	E64	2.0445
100	E65	0.72
100	E66	-0.6481
100	E67	-2.4566
100	E68	1.65
100	E69	0.7424
100	E70	0.6895
100	E71	-1.6892
100	E72	-1.6672
100	E73	1.4773
100	E74	0.8049
100	E75	-1.2124
100	E76	-2.4035
100	E77	-2.3434
100	E78	-1.5997
100	E79	-0.7353
100	E80	-0.7802
100	E81	1.226
100	E82	1.6917
100	E83	-0.4898
100	E84	-0.9606
100	E85	-0.3925
100	E86	-1.0277
100	E87	-0.7534
100	E88	0.1972
100	E89	1.2307
100	E90	-0.1081
100	E91	0.6254
100	E92	-0.0087
100	E93	0.0951
100	E94	0.1096
100	E95	0.6834
100	E96	1.2025
100	E97	0.0274
100	E98	0.1326
100	E99	-1.5477
100	E101	2.0515
100	E102	0.154
100	E103	-0.5076
100	E104	-0.6352
100	E105	-0.3991
100	E106	0.4026
100	E107	-0.1841
100	E108	0.4348
100	E109	-0.5515
100	E110	-0.2443
100	E111	-0.2879
100	E112	-0.2223
100	E113	-0.7255
100	E114	0.9425
100	E115	0.77
100	E116	0.0472
100	E117	0.0214
100	E118	1.177
100	E119	-0.1304
100	E120	1.2026
100	E121	0.6874
100	E122	2.1631
100	E123	0.2047
100	E124	0.4838
100	Cz	-0.2552
200	E1	0.2227
200	E2	0.5352
200	E3	-0.3804
200	E4	-0.3889
200	E5	0.25
200	E6	0.4443
200	E7	0.2443
200	E9	-0.0847
200	E10	0.3219
200	E11	-0.086
200	E12	0.4501
200	E13	0.5693
200	E15	-0.5274
200	E16	-0.5634
200	E18	-0.8079
200	E19	0.3113
200	E20	0.331
200	E22	0.126
200	E23	-0.5105
200	E24	1.0401
200	E26	1.4176
200	E27	0.5372
200	E28	1.0288
200	E29	0.397
200	E30	0.7642
200	E31	0.5192
200	E32	1.9382
200	E33	2.0246
200	E34	1.2097
200	E35	1.4302
200	E36	0.7349
200	E37	1.0679
200	E38	0.8871
200	E39	1.1707
200	E40	0.7071
200	E41	0.8445
200	E42	1.5823
200	E43	0.4498
200	E44	1.8044
200	E45	1.0203
200	E46	1.9771
200	E47	1.4084
200	E48	0.4632
200	E49	-0.1803
200	E50	0.7248
200	E51	1.6629
200	E52	0.9
200	E53	0.5247
200	E54	0.0219
200	E55	-0.2561
200	E56	-1.1674
200	E58	1.3015
200	E59	1.0048
200	E60	0.4166
200	E61	-0.6714
200	E62	-0.9078
200	E63	1.0299
200	E64	-0.6213
200	E65	1.064
200	E66	0.2694
200	E67	-1.3423
200	E68	-0.8127
200	E69	-0.0442
200	E70	-0.1989
200	E71	-1.0976
200	E72	-1.0876
200	E73	0.0305
200	E74	0.0862
200	E75	-1.2623
200	E76	-1.69
200	E77	-0.4356
200	E78	0.0955
200	E79	-0.0147
200	E80	0.0655
200	E81	1.2818
200	E82	0.1187
200	E83	-0.6638
200	E84	0.2017
200	E85	0.6706
200	E86	-0.2356
200	E87	-0.2042
200	E88	0.5047
200	E89	0.371
200	E90	-0.3486
200	E91	0.3246
200	E92	0.6129
200	E93	0.4134
200	E94	-0.1958
200	E95	0.3193
200	E96	1.0435
200	E97	0.4813
200	E98	1.0777
200	E99	-0.1643
200	E101	1.5198
200	E102	-0.0231
200	E103	-0.2387
200	E104	-0.706
200	E105	-0.5357
200	E106	0.2726
200	E107	-1.4849
200	E108	-1.0963
200	E109	-1.3325
200	E110	-1.1581
200	E111	-0.6273
200	E112	0.1602
200	E113	0.2639
200	E114	1.5152
200	E115	1.1032
200	E116	-1.1014
200	E117	-1.054
200	E118	0.3635
200	E119	-0.0423
200	E120	1.3018
200	E121	-0.2908
200	E122	0.9203
200	E123	-0.7758
200	E124	-0.5215
200	Cz	-0.1104
300	E1	0.2247
300	E2	-1.0828
300	E3	-0.2844
300	E4	-0.6895
300	E5	-0.3193
300	E6	-0.9414
300	E7	-0.1464
300	E9	-0.4723
300	E10	-0.3444
300	E11	-0.3061
300	E12	-0.6688
300	E13	-0.0814
300	E15	0.2697
300	E16	-0.233
300	E18	-0.659
300	E19	-0.788
300	E20	-0.1032
300	E22	0.1291
300	E23	-0.953
300	E24	0.007
300	E26	-0.0772
300	E27	0.2626
300	E28	-0.1093
300	E29	-0.5251
300	E30	-0.3651
300	E31	-0.2153
300	E32	2.3359
300	E33	0.4791
300	E34	0.5222
300	E35	-0.984
300	E36	-0.7465
300	E37	-0.3637
300	E38	2.1037
300	E39	0.1236
300	E40	-0.3791
300	E41	-0.6536
300	E42	-0.7097
300	E43	1.0826
300	E44	1.3923
300	E45	-0.6278
300	E46	-0.17
300	E47	-0.6476
300	E48	0.8578
300	E49	0.2789
300	E50	1.2838
300	E51	0.5779
300	E52	-0.1954
300	E53	-0.6932
300	E54	-0.7009
300	E55	-0.2392
300	E56	0.9064
300	E58	-0.2566
300	E59	1.0451
300	E60	0.0466
300	E61	-0.9175
300	E62	-1.6519
300	E63	1.3695
300	E64	0.1694
300	E65	0.8463
300	E66	0.7344
300	E67	-1.2661
300	E68	0.6634
300	E69	1.1604
300	E70	-0.9588
300	E71	-0.4592
300	E72	-0.6447
300	E73	0.8502
300	E74	0.2745
300	E75	-1.2439
300	E76	-1.1946
300	E77	-0.5735
300	E78	0.1569
300	E79	0.1396
300	E80	-0.8529
300	E81	-0.3769
300	E82	0.3268
300	E83	-0.6396
300	E84	-1.073
300	E85	-0.0004
300	E86	-0.277
300	E87	-0.3233
300	E88	-1.5054
300	E89	-0.1509
300	E90	-2.0649
300	E91	-0.4416
300	E92	-0.0091
300	E93	0.7232
300	E94	-1.0071
300	E95	-1.3593
300	E96	-0.1587
300	E97	-0.3077
300	E98	0.3533
300	E99	0.703
300	E101	0.4587
300	E102	0.8699
300	E103	-0.0749
300	E104	-0.0336
300	E105	-0.544
300	E106	-0.6486
300	E107	0.8116
300	E108	0.063
300	E109	-0.1282
300	E110	0.2888
300	E111	-0.5353
300	E112	-0.5353
300	E113	-0.0439
300	E114	-0.2658
300	E115	0.242
300	E116	-0.1388
300	E117	0.2056
300	E118	0.01
300	E119	0.1098
300	E120	-0.0283
300	E121	-0.4014
300	E122	1.6546
300	E123	-0.2344
300	E124	-0.243
300	Cz	-0.4911
400	E1	-0.1984
400	E2	-0.6608
400	E3	0.5036
400	E4	0.0369
400	E5	-0.1637
400	E6	-0.7172
400	E7	-1.8611
400	E9	-0.1949
400	E10	0.4824
400	E11	0.6685
400	E12	-0.2898
400	E13	-0.7294
400	E15	0.7317
400	E16	0.997
400	E18	0.437
400	E19	-0.1833
400	E20	-0.0685
400	E22	-0.3684
400	E23	-0.0474
400	E24	0.3741
400	E26	0.9735
400	E27	0.8055
400	E28	0.7724
400	E29	-0.2762
400	E30	-1.1586
400	E31	-1.7266
400	E32	1.3079
400	E33	-0.5059
400	E34	0.9343
400	E35	0.2414
400	E36	-0.5937
400	E37	-0.6259
400	E38	-1.2146
400	E39	0.4839
400	E40	0.5434
400	E41	-0.403
400	E42	-0.0907
400	E43	-0.8113
400	E44	-0.4513
400	E45	0.4145
400	E46	0.1324
400	E47	-0.6311
400	E48	-1.0869
400	E49	-2.4845
400	E50	-0.727
400	E51	-0.7857
400	E52	-0.5806
400	E53	-0.7861
400	E54	-1.4873
400	E55	-2.5575
400	E56	0.6078
400	E58	-2.4474
400	E59	-0.4615
400	E60	-0.7522
400	E61	-0.9686
400	E62	-2.2171
400	E63	-0.592
400	E64	-1.2121
400	E65	-2.309
400	E66	-1.7247
400	E67	-1.6438
400	E68	-0.3285
400	E69	-1.1564
400	E70	-2.605
400	E71	-2.5575
400	E72	-1.6696
400	E73	0.592
400	E74	-0.9689
400	E75	-2.7703
400	E76	-3.2578
400	E77	-2.7442
400	E78	-3.0304
400	E79	-2.0802
400	E80	-2.6336
400	E81	1.4887
400	E82	-0.8896
400	E83	-3.7164
400	E84	-3.7774
400	E85	-2.7905
400	E86	-2.9435
400	E87	-2.4321
400	E88	-0.4242
400	E89	-2.3713
400	E90	-4.936
400	E91	-2.8885
400	E92	-1.8503
400	E93	-1.6588
400	E94	-1.648
400	E95	-1.9747
400	E96	-3.6745
400	E97	-2.0463
400	E98	-1.2476
400	E99	-1.4257
400	E101	-0.7689
400	E102	-1.2391
400	E103	-1.4597
400	E104	-1.3727
400	E105	-1.8823
400	E106	-1.982
400	E107	-0.2421
400	E108	-0.1326
400	E109	-0.8821
400	E110	-1.2266
400	E111	-1.5147
400	E112	-1.1406
400	E113	-0.8159
400	E114	0.3449
400	E115	0.3979
400	E116	-1.2119
400	E117	-1.0029
400	E118	-0.4874
400	E119	-2.0232
400	E120	-0.5289
400	E121	-0.7327
400	E122	-0.15
400	E123	-0.6771
400	E124	-0.2128
400	Cz	-2.4956
500	E1	-0.3758
500	E2	-0.3481
500	E3	0.2278
500	E4	0.0047
500	E5	-0.2801
500	E6	-0.2402
500	E7	-1.0019
500	E9	-0.1255
500	E10	0.4679
500	E11	0.0395
500	E12	-0.8026
500	E13	-0.7495
500	E15	-0.08
500	E16	-0.8297
500	E18	-1.0273
500	E19	-0.4815
500	E20	-0.3626
500	E22	0.6007
500	E23	-0.5217
500	E24	-0.6993
500	E26	0.7912
500	E27	-0.2325
500	E28	-0.4374
500	E29	-1.0567
500	E30	-1.1897
500	E31	-1.0649
500	E32	0.2534
500	E33	0.2168
500	E34	-0.2774
500	E35	-0.4383
500	E36	-2.1093
500	E37	-1.1398
500	E38	-1.7938
500	E39	-0.3409
500	E40	-0.1594
500	E41	-1.3848
500	E42	-0.8569
500	E43	-0.869
500	E44	-1.6737
500	E45	-0.3481
500	E46	-0.4725
500	E47	-1.3858
500	E48	-1.6578
500	E49	-2.139
500	E50	-0.7039
500	E51	-1.1204
500	E52	-1.1751
500	E53	-1.2428
500	E54	-1.1671
500	E55	-2.3869
500	E56	-0.7362
500	E58	-1.0131
500	E59	-0.6533
500	E60	-1.3266
500	E61	-1.4677
500	E62	-2.7754
500	E63	-0.727
500	E64	-0.5438
500	E65	-1.0755
500	E66	-1.55
500	E67	-2.8391
500	E68	-0.8303
500	E69	0.1899
500	E70	-2.5499
500	E71	-3.1574
500	E72	-3.049
500	E73	0.6161
500	E74	-0.6046
500	E75	-2.8049
500	E76	-4.4997
500	E77	-3.4826
500	E78	-2.7105
500	E79	-2.6166
500	E80	-2.6085
500	E81	1.5678
500	E82	1.3299
500	E83	-2.9807
500	E84	-3.7328
500	E85	-2.5502
500	E86	-2.3654
500	E87	-3.1762
500	E88	-0.5045
500	E89	-1.0522
500	E90	-4.3965
500	E91	-2.5224
500	E92	-2.1897
500	E93	-1.9174
500	E94	-0.7937
500	E95	-1.7563
500	E96	-3.2407
500	E97	-1.7357
500	E98	-1.3898
500	E99	-2.079
500	E101	-1.3055
500	E102	-1.2638
500	E103	-1.4915
500	E104	-1.9933
500	E105	-1.7137
500	E106	-0.9588
500	E107	-0.3737
500	E108	-2.5277
500	E109	-1.6714
500	E110	-1.9514
500	E111	-2.2204
500	E112	-0.9572
500	E113	-0.3439
500	E114	-0.6039
500	E115	-0.7207
500	E116	-2.0905
500	E117	-1.4386
500	E118	-0.9669
500	E119	-1.2199
500	E120	-1.1261
500	E121	-0.3843
500	E122	-0.1536
500	E123	-1.0242
500	E124	-0.1715
500	Cz	-1.5851
600	E1	-1.8868
600	E2	-2.7412
600	E3	-1.9493
600	E4	-3.7493
600	E5	-3.321
600	E6	-2.6237
600	E7	-2.1538
600	E9	-2.4227
600	E10	-2.9422
600	E11	-2.9587
600	E12	-3.4
600	E13	-1.9215
600	E15	-3.1287
600	E16	-3.442
600	E18	-3.159
600	E19	-1.8314
600	E20	-2.3236
600	E22	-2.182
600	E23	-2.0989
600	E24	-1.8396
600	E26	-1.1265
600	E27	-1.3195
600	E28	-1.7439
600	E29	-2.1105
600	E30	-1.9811
600	E31	-2.5808
600	E32	-1.3987
600	E33	-1.1545
600	E34	-1.2822
600	E35	-2.4225
600	E36	-2.3561
600	E37	-1.2795
600	E38	-1.5888
600	E39	-1.2367
600	E40	-1.2925
600	E41	-1.6616
600	E42	-0.653
600	E43	-0.8534
600	E44	-0.6899
600	E45	0.12
600	E46	-0.9391
600	E47	-2.0274
600	E48	-2.4865
600	E49	-2.0404
600	E50	-1.4963
600	E51	-1.229
600	E52	-1.2148
600	E53	-1.0681
600	E54	-1.3577
600	E55	-2.357
600	E56	-0.5209
600	E58	-1.7101
600	E59	-1.023
600	E60	-2.0174
600	E61	-1.2458
600	E62	-1.5349
600	E63	-1.3052
600	E64	-1.4487
600	E65	-2.4336
600	E66	-1.9669
600	E67	-2.096
600	E68	-0.896
600	E69	-0.8315
600	E70	-2.4887
600	E71	-2.8519
600	E72	-1.9726
600	E73	-0.0453
600	E74	-0.7526
600	E75	-2.195
600	E76	-3.2515
600	E77	-2.6691
600	E78	-1.9608
600	E79	-2.5916
600	E80	-2.9391
600	E81	0.4848
600	E82	-0.5935
600	E83	-3.8851
600	E84	-4.0463
600	E85	-3.4555
600	E86	-2.7366
600	E87	-3.7945
600	E88	-0.0759
600	E89	-1.6617
600	E90	-5.7579
600	E91	-3.9664
600	E92	-4.0294
600	E93	-3.1253
600	E94	-0.2396
600	E95	-1.6294
600	E96	-3.789
600	E97	-3.0538
600	E98	-3.5024
600	E99	-0.7073
600	E101	-1.2973
600	E102	-2.5682
600	E103	-3.3784
600	E104	-3.3555
600	E105	-3.444
600	E106	-2.7018
600	E107	-0.9679
600	E108	-1.4244
600	E109	-3.4075
600	E110	-2.907
600	E111	-4.1315
600	E112	-3.2756
600	E113	-0.2726
600	E114	-0.4278
600	E115	-0.4987
600	E116	-3.316
600	E117	-4.0732
600	E118	-3.581
600	E119	-1.2415
600	E120	-1.2882
600	E121	-0.4315
600	E122	-1.5573
600	E123	-3.1985
600	E124	-2.7805
600	Cz	-2.3314
700	E1	0.3103
700	E2	-0.8995
700	E3	-1.6225
700	E4	-1.9821
700	E5	-1.7192
700	E6	-1.6856
700	E7	-1.8018
700	E9	-2.3786
700	E10	-2.0831
700	E11	-1.436
700	E12	-1.9569
700	E13	-1.5141
700	E15	-1.932
700	E16	-2.2742
700	E18	-1.6047
700	E19	-1.6013
700	E20	-1.4849
700	E22	-1.1753
700	E23	-2.1143
700	E24	-2.0002
700	E26	-0.859
700	E27	-1.6945
700	E28	-2.1237
700	E29	-1.6903
700	E30	-1.8264
700	E31	-2.392
700	E32	-1.2178
700	E33	-1.2979
700	E34	-2.1263
700	E35	-1.4682
700	E36	-1.9265
700	E37	-0.9467
700	E38	-1.4092
700	E39	-0.3328
700	E40	-1.4537
700	E41	-1.2562
700	E42	-1.6407
700	E43	-0.6801
700	E44	0.3578
700	E45	0.2084
700	E46	-1.5353
700	E47	-1.9345
700	E48	-0.6502
700	E49	-0.971
700	E50	-1.9588
700	E51	-2.263
700	E52	-1.6346
700	E53	-2.0961
700	E54	-1.9757
700	E55	-2.6927
700	E56	0.1795
700	E58	-1.6751
700	E59	-1.4708
700	E60	-1.9046
700	E61	-1.3042
700	E62	-1.7088
700	E63	-0.2884
700	E64	-1.3836
700	E65	-2.043
700	E66	-2.1354
700	E67	-1.7916
700	E68	1.2728
700	E69	-0.4264
700	E70	-2.4483
700	E71	-2.168
700	E72	-1.8123
700	E73	1.2807
700	E74	-0.0873
700	E75	-2.1813
700	E76	-2.9007
700	E77	-2.1783
700	E78	-1.2783
700	E79	-2.4036
700	E80	-1.9113
700	E81	0.9858
700	E82	0.064
700	E83	-3.4666
700	E84	-2.3559
700	E85	-1.0341
700	E86	-1.5359
700	E87	-2.3481
700	E88	-0.533
700	E89	-1.9629
700	E90	-4.0242
700	E91	-1.6532
700	E92	-1.8125
700	E93	-1.0981
700	E94	-0.2737
700	E95	-3.0301
700	E96	-3.36
700	E97	-1.8869
700	E98	-1.7182
700	E99	-0.5256
700	E101	-0.736
700	E102	-0.4848
700	E103	-0.7794
700	E104	-2.0865
700	E105	-1.9107
700	E106	-2.2437
700	E107	-0.9058
700	E108	-0.6339
700	E109	-1.5261
700	E110	-1.3744
700	E111	-2.0607
700	E112	-2.436
700	E113	-0.6762
700	E114	-1.3024
700	E115	0.1057
700	E116	-1.1427
700	E117	-1.6188
700	E118	-1.1665
700	E119	-1.0062
700	E120	-1.4968
700	E121	-0.9503
700	E122	-0.2139
700	E123	-1.5597
700	E124	-1.8842
700	Cz	-2.8337
800	E1	-1.0104
800	E2	-0.1341
800	E3	-0.1383
800	E4	-0.3315
800	E5	-0.5456
800	E6	-1.2732
800	E7	-0.6704
800	E9	-0.5187
800	E10	0.1236
800	E11	-0.0554
800	E12	-1.0172
800	E13	-1.1546
800	E15	-0.7341
800	E16	-0.6698
800	E18	-1.0448
800	E19	-0.8002
800	E20	-0.9755
800	E22	-0.3839
800	E23	-0.9836
800	E24	-0.8015
800	E26	-0.5194
800	E27	-0.8257
800	E28	-1.3314
800	E29	-1.6977
800	E30	-1.1825
800	E31	-1.1086
800	E32	-0.0036
800	E33	-1.0228
800	E34	-1.1588
800	E35	-0.8176
800	E36	-0.8353
800	E37	-0.8105
800	E38	-1.8495
800	E39	-0.7373
800	E40	-1.5182
800	E41	-0.8346
800	E42	-0.7142
800	E43	0.173
800	E44	-0.208
800	E45	-0.4232
800	E46	-1.2723
800	E47	-1.4552
800	E48	-1.5781
800	E49	-1.3519
800	E50	-0.6789
800	E51	-1.3714
800	E52	-2.0295
800	E53	-1.3666
800	E54	-1.0837
800	E55	-1.3884
800	E56	0.0103
800	E58	-2.5369
800	E59	-1.5569
800	E60	-1.9519
800	E61	-1.9641
800	E62	-1.8511
800	E63	1.1532
800	E64	-1.9551
800	E65	-3.3369
800	E66	-2.5767
800	E67	-1.9743
800	E68	0.6271
800	E69	-0.8653
800	E70	-2.9848
800	E71	-2.1231
800	E72	-1.351
800	E73	0.3793
800	E74	-0.6905
800	E75	-2.3704
800	E76	-2.9839
800	E77	-1.8891
800	E78	-1.4806
800	E79	-1.3863
800	E80	-1.4909
800	E81	1.2688
800	E82	-0.1817
800	E83	-3.027
800	E84	-2.8341
800	E85	-1.5805
800	E86	-2.0699
800	E87	-2.5186
800	E88	-0.6532
800	E89	-1.144
800	E90	-3.4046
800	E91	-2.1325
800	E92	-2.0328
800	E93	-1.9576
800	E94	-1.6168
800	E95	-1.3053
800	E96	-2.6071
800	E97	-2.1573
800	E98	-1.8153
800	E99	-0.6185
800	E101	-0.1604
800	E102	-1.8342
800	E103	-2.2182
800	E104	-2.2953
800	E105	-1.3875
800	E106	-1.4731
800	E107	-2.1096
800	E108	-1.3625
800	E109	-2.2688
800	E110	-2.1384
800	E111	-1.7317
800	E112	-1.5605
800	E113	-1.8479
800	E114	-1.2067
800	E115	-1.0712
800	E116	-1.3227
800	E117	-1.1589
800	E118	-0.1199
800	E119	-1.9024
800	E120	-1.9974
800	E121	-2.4976
800	E122	-0.5071
800	E123	-0.4817
800	E124	-0.048
800	Cz	-1.1122

## Sheet: Fig S1A
Fig S1A: Partial scores from working memory tasks
Subject	OSpan_PartialScore	OSpan_AbsoluteScore	SymSpan_PartialScore	SymSpan_AbsoluteScore
1	50	50	16	8
2	50	50	27	23
3	47	41	31	20
4	50	50	27	23
5	48	43	22	15
6	46	30	21	14
7	39	9	15	8
8	49	43	17	9
9	39	30	20	15
10	47	44	24	23
11	48	43	25	17
12	50	50	11	7
13	47	38	24	18
14	50	50	22	15
15	44	38	19	14
16	50	50	22	13
17	46	37	20	15
18	50	50	22	18
19	41	33	22	14
20	42	26	19	9
21	48	37	24	20
22	37	24	26	19
23	39	33	9	5
24	47	43	24	18
25	42	41	20	11
26	48	43	23	11
27	42	26	23	10
28	40	31	23	20
29	50	50	21	14
30	44	32	17	14
31	49	43	26	25
32	36	27	21	15
33	48	36	24	19
34	41	31	25	20
35	45	36	27	24
36	46	39	25	14
37	27	19	26	23
38	48	43	27	23
39	47	43	21	6
40	47	39	17	8
41	39	29	20	12
42	42	20	25	25
43	45	38	27	23
44	50	50	15	8
45	40	31	22	19
46	43	30	19	8
47	48	43	17	14
48	48	43	22	19
49	44	34	23	19
50	45	37	19	11

## Sheet: Fig S1B
Fig S1B: By-participant data from Flanker task
Participant	RT_mean	RT_SD	RT_congruent_mean	RT_congruent_median	ACC_congruent	RT_incongruent_mean	RT_incongruent_median	ACC_incongruent	RT_CongruencyEffect	ACC_CongruencyEffect	IE_congruent	IE_incongruent	IE_Effect	ExperimentGroup
1	469.42	73.0276	452.939	447	1	506.184	502	0.979592	53.2449	-0.0204082	447	512.458	65.4583	Non-aligned condition
10	437.56	67.3771	419.06	419	1	484.18	489.5	0.86	65.12	-0.14	419	569.186	150.186	Aligned condition
11	363.667	40.3131	353.06	355.5	1	377.447	381	0.829787	24.3868	-0.170213	355.5	459.154	103.654	Non-aligned condition
12	609.333	169.649	533.3	523.5	1	694.62	660	0.02	161.32	-0.98	523.5	33000	32476.5	Aligned condition
13	510.82	194.852	431.204	416	0.836735	559.729	554.5	0.0208333	128.525	-0.815901	497.171	26616	26118.8	Non-aligned condition
14	570.66	157.949	556.38	507	0.98	571.681	570	1	15.3009	0.02	517.347	570	52.6531	Aligned condition
15	485.627	98.3953	450.12	434.5	1	517.208	505.5	0.979167	67.0883	-0.0208333	434.5	516.255	81.7553	Non-aligned condition
16	477.287	64.8255	445.04	444.5	1	523.208	519.5	0.979167	78.1683	-0.0208333	444.5	530.553	86.0532	Aligned condition
17	583.653	129.583	582.2	558.5	1	610.167	602	1	27.9667	0	558.5	602	43.5	Non-aligned condition
18	437.887	67.9905	422.02	414	1	459.438	454	0.979167	37.4175	-0.0208333	414	463.66	49.6596	Aligned condition
19	526.953	81.5508	515.551	504	1	547.02	518	1	31.4694	0	504	518	14	Non-aligned condition
2	383.087	206.476	381.16	433	0.78	383.88	457	0.68	2.72	-0.1	555.128	672.059	116.931	Aligned condition
20	417.74	68.8717	410.857	411	0.979592	456.72	450.5	0.9	45.8629	-0.0795918	419.562	500.556	80.9931	Aligned condition
21	542.927	130.543	520.52	487	1	566.306	554	0.979592	45.7861	-0.0204082	487	565.542	78.5417	Non-aligned condition
22	399.213	56.8859	371.72	363.5	1	449.84	444	1	78.12	0	363.5	444	80.5	Aligned condition
23	449.167	105.863	412.14	406.5	1	490.609	458	0.913043	78.4687	-0.0869565	406.5	501.619	95.119	Non-aligned condition
24	536.867	87.242	521.54	504	1	588.306	572	0.959184	66.7661	-0.0408163	504	596.34	92.3404	Aligned condition
25	487.053	119.054	441.673	433	1	552.714	538	0.959184	111.041	-0.0408163	433	560.894	127.894	Non-aligned condition
26	499.567	79.2727	482.76	473.5	1	513.06	490.5	0.98	30.3	-0.02	473.5	500.51	27.0102	Aligned condition
27	415.7	151.664	348.8	385.5	0.86	503.44	520	0.92	154.64	0.06	448.256	565.217	116.962	Non-aligned condition
28	416.507	57.9632	397.5	385.5	1	457.5	459.5	0.92	60	-0.08	385.5	499.457	113.957	Aligned condition
29	554.367	188.286	520.128	495	0.978723	555.92	536	0.96	35.7923	-0.0187234	505.761	558.333	52.5725	Non-aligned condition
3	392.44	81.0765	371.18	362.5	1	428.771	433	0.833333	57.5908	-0.166667	362.5	519.6	157.1	Non-aligned condition
30	474.267	114.838	458.52	441	1	483.021	474	0.958333	24.5008	-0.0416667	441	494.609	53.6087	Aligned condition
31	500.413	111.088	470.918	451	1	542	523	0.914894	71.0816	-0.0851064	451	571.651	120.651	Non-aligned condition
32	482.66	90.232	450.14	438.5	1	523.646	521.5	0.958333	73.5058	-0.0416667	438.5	544.174	105.674	Aligned condition
33	428.567	70.8118	403.3	388.5	1	461.857	464	0.938776	58.5571	-0.0612245	388.5	494.261	105.761	Non-aligned condition
34	444.333	63.0196	422.72	420.5	1	486.51	493	0.938776	63.7902	-0.0612245	420.5	525.152	104.652	Aligned condition
35	376.32	63.9556	360.02	361.5	0.92	394.776	398	0.163265	34.7555	-0.756735	392.935	2437.75	2044.82	Non-aligned condition
36	408.013	87.6525	384.08	365.5	1	453.347	439	0.897959	69.2669	-0.102041	365.5	488.886	123.386	Aligned condition
37	502.973	76.6777	471.184	462	1	547.429	553	0.959184	76.2449	-0.0408163	462	576.532	114.532	Non-aligned condition
38	587.373	110.421	581.939	571	1	629.776	609	1	47.8367	0	571	609	38	Aligned condition
39	493.387	90.8732	479.122	463	0.979592	522.571	527	0.979592	43.449	0	472.646	537.979	65.3333	Non-aligned condition
4	390.12	56.7871	374.56	367.5	1	412.49	404	0.938776	37.9298	-0.0612245	367.5	430.348	62.8478	Aligned condition
40	438.6	78.0924	421.62	415	0.98	475.043	465	0.978723	53.4226	-0.0012766	423.469	475.109	51.6393	Aligned condition
41	494.353	132.992	456.146	451.5	0.979167	539.42	521.5	0.98	83.2742	0.000833333	461.106	532.143	71.0365	Non-aligned condition
42	515.287	87.3764	500.64	479	1	549.082	535	0.979592	48.4416	-0.0204082	479	546.146	67.1458	Aligned condition
43	436.7	65.3214	419.18	406	1	469.78	466.5	0.92	50.6	-0.08	406	507.065	101.065	Non-aligned condition
44	436.247	63.2259	412.46	409.5	1	483.5	486.5	0.916667	71.04	-0.0833333	409.5	530.727	121.227	Aligned condition
45	533.953	88.7534	507.06	496.5	1	561.041	552	0.979592	53.9808	-0.0204082	496.5	563.5	67	Non-aligned condition
46	673.973	280.622	557.04	561	0.92	867.6	914.5	0.06	310.56	-0.86	609.783	15241.7	14631.9	Aligned condition
47	478.56	85.8006	465.94	458	1	509.24	505	1	43.3	0	458	505	47	Non-aligned condition
48	576.313	173.958	469.204	462	0	727.917	733.5	0.875	258.713	0.875	Inf	838.286	-Inf	Aligned condition
49	434.293	85.5361	424.6	407.5	0.96	437.408	438	0.77551	12.8082	-0.18449	424.479	564.789	140.31	Non-aligned condition
5	425.24	81.5462	384.735	383	1	486.76	491.5	0.98	102.025	-0.02	383	501.531	118.531	Non-aligned condition
50	640.493	210.818	587.021	536	0.979167	698.75	685.5	1	111.729	0.0208333	547.404	685.5	138.096	Aligned condition
6	485.74	104.571	432.62	424.5	1	562.56	550.5	0.94	129.94	-0.06	424.5	585.638	161.138	Aligned condition
7	532.313	124.452	495.88	470.5	1	608.204	586	1	112.324	0	470.5	586	115.5	Non-aligned condition
8	378.993	68.9958	371.1	354	0	396.681	385	0.0638298	25.5809	0.0638298	Inf	6031.67	-Inf	Aligned condition
9	452.5	69.9111	428.42	421	1	494.25	487	1	65.83	0	421	487	66	Non-aligned condition

## Sheet: Fig S2
Fig S2: Speech onset latencies (in seconds)
StimulusPicture	Subject	transitivity_sentence	sentence.type	speechonset
angle-sailor-octopus	4	Transitive (two participants)	Aligned (transitive)	5.51727
angle-sailor-octopus	21	Transitive (two participants)	Non-aligned (transitive)	3.34052
angle-sailor-octopus	30	Transitive (two participants)	Aligned (transitive)	1.65546
angle-sailor-octopus	15	Transitive (two participants)	Non-aligned (transitive)	2.07483
angle-sailor-octopus	40	Transitive (two participants)	Aligned (transitive)	4.12941
angle-sailor-octopus	38	Transitive (two participants)	Aligned (transitive)	3.69539
angle-sailor-octopus	3	Transitive (two participants)	Non-aligned (transitive)	3.61004
angle-sailor-octopus	27	Transitive (two participants)	Non-aligned (transitive)	2.52025
angle-sailor-octopus	17	Transitive (two participants)	Non-aligned (transitive)	1.97131
angle-sailor-octopus	36	Transitive (two participants)	Aligned (transitive)	2.93011
angle-sailor-octopus	6	Transitive (two participants)	Aligned (transitive)	2.22194
angle-sailor-octopus	8	Transitive (two participants)	Aligned (transitive)	2.86884
angle-sailor-octopus	11	Transitive (two participants)	Non-aligned (transitive)	3.33601
angle-sailor-octopus	48	Transitive (two participants)	Aligned (transitive)	4.16118
angle-sailor-octopus	49	Transitive (two participants)	Non-aligned (transitive)	2.42499
angle-sailor-octopus	20	Transitive (two participants)	Aligned (transitive)	1.08517
angle-sailor-octopus	22	Transitive (two participants)	Aligned (transitive)	4.49941
angle-sailor-octopus	16	Transitive (two participants)	Aligned (transitive)	2.8943
angle-sailor-octopus	24	Transitive (two participants)	Aligned (transitive)	1.90826
angle-sailor-octopus	44	Transitive (two participants)	Aligned (transitive)	2.4075
angle-sailor-octopus	13	Transitive (two participants)	Non-aligned (transitive)	3.15501
angle-sailor-octopus	10	Transitive (two participants)	Aligned (transitive)	1.712
angle-sailor-octopus	2	Transitive (two participants)	Aligned (transitive)	2.51717
angle-sailor-octopus	35	Transitive (two participants)	Non-aligned (transitive)	2.36029
angle-sailor-octopus	23	Transitive (two participants)	Non-aligned (transitive)	1.55493
angle-sailor-octopus	29	Transitive (two participants)	Non-aligned (transitive)	2.94584
angle-sailor-octopus	45	Transitive (two participants)	Non-aligned (transitive)	5.58554
angle-sailor-octopus	12	Transitive (two participants)	Aligned (transitive)	4.53263
angle-sailor-octopus	39	Transitive (two participants)	Non-aligned (transitive)	3.89481
angle-sailor-octopus	5	Transitive (two participants)	Non-aligned (transitive)	4.50914
angle-sailor-octopus	1	Transitive (two participants)	Non-aligned (transitive)	2.42983
angle-sailor-octopus	33	Transitive (two participants)	Non-aligned (transitive)	1.87402
angle-sailor-octopus	43	Transitive (two participants)	Non-aligned (transitive)	4.96389
angle-sailor-octopus	50	Transitive (two participants)	Aligned (transitive)	2.90723
angle-sailor-octopus	19	Transitive (two participants)	Non-aligned (transitive)	2.86678
angle-sailor-octopus	18	Transitive (two participants)	Aligned (transitive)	1.75118
arrest-jailguard-prisoner	48	Transitive (two participants)	Aligned (transitive)	3.22449
arrest-jailguard-prisoner	41	Transitive (two participants)	Non-aligned (transitive)	3.39168
arrest-jailguard-prisoner	2	Transitive (two participants)	Aligned (transitive)	2.93396
arrest-jailguard-prisoner	50	Transitive (two participants)	Aligned (transitive)	2.35884
arrest-jailguard-prisoner	25	Transitive (two participants)	Non-aligned (transitive)	2.32724
arrest-jailguard-prisoner	36	Transitive (two participants)	Aligned (transitive)	2.78815
arrest-jailguard-prisoner	46	Transitive (two participants)	Aligned (transitive)	4.74189
arrest-jailguard-prisoner	42	Transitive (two participants)	Aligned (transitive)	2.38945
arrest-jailguard-prisoner	20	Transitive (two participants)	Aligned (transitive)	1.07789
arrest-jailguard-prisoner	16	Transitive (two participants)	Aligned (transitive)	1.99286
arrest-jailguard-prisoner	30	Transitive (two participants)	Aligned (transitive)	2.86509
arrest-jailguard-prisoner	32	Transitive (two participants)	Aligned (transitive)	4.3819
arrest-jailguard-prisoner	8	Transitive (two participants)	Aligned (transitive)	2.77255
arrest-jailguard-prisoner	23	Transitive (two participants)	Non-aligned (transitive)	3.3771
arrest-jailguard-prisoner	34	Transitive (two participants)	Aligned (transitive)	2.21786
arrest-jailguard-prisoner	14	Transitive (two participants)	Aligned (transitive)	1.90537
arrest-jailguard-prisoner	18	Transitive (two participants)	Aligned (transitive)	1.61934
arrest-jailguard-prisoner	3	Transitive (two participants)	Non-aligned (transitive)	2.51176
arrest-jailguard-prisoner	49	Transitive (two participants)	Non-aligned (transitive)	1.84765
arrest-jailguard-prisoner	19	Transitive (two participants)	Non-aligned (transitive)	2.46706
arrest-jailguard-prisoner	44	Transitive (two participants)	Aligned (transitive)	3.11099
arrest-jailguard-prisoner	17	Transitive (two participants)	Non-aligned (transitive)	1.48476
arrest-jailguard-prisoner	4	Transitive (two participants)	Aligned (transitive)	2.43486
arrest-jailguard-prisoner	6	Transitive (two participants)	Aligned (transitive)	2.0275
arrest-jailguard-prisoner	1	Transitive (two participants)	Non-aligned (transitive)	2.5939
arrest-jailguard-prisoner	45	Transitive (two participants)	Non-aligned (transitive)	4.76576
arrest-jailguard-prisoner	35	Transitive (two participants)	Non-aligned (transitive)	2.33271
arrest-jailguard-prisoner	13	Transitive (two participants)	Non-aligned (transitive)	1.80651
arrest-jailguard-prisoner	40	Transitive (two participants)	Aligned (transitive)	4.51574
arrest-jailguard-prisoner	21	Transitive (two participants)	Non-aligned (transitive)	2.5867
arrest-jailguard-prisoner	33	Transitive (two participants)	Non-aligned (transitive)	2.28426
arrest-jailguard-prisoner	22	Transitive (two participants)	Aligned (transitive)	3.39342
arrest-jailguard-prisoner	27	Transitive (two participants)	Non-aligned (transitive)	2.39083
arrest-policeman-man	4	Transitive (two participants)	Aligned (transitive)	2.10028
arrest-policeman-man	24	Transitive (two participants)	Aligned (transitive)	2.08316
arrest-policeman-man	14	Transitive (two participants)	Aligned (transitive)	2.07006
arrest-policeman-man	15	Transitive (two participants)	Non-aligned (transitive)	2.30244
arrest-policeman-man	39	Transitive (two participants)	Non-aligned (transitive)	4.06396
arrest-policeman-man	8	Transitive (two participants)	Aligned (transitive)	4.00405
arrest-policeman-man	25	Transitive (two participants)	Non-aligned (transitive)	1.88382
arrest-policeman-man	16	Transitive (two participants)	Aligned (transitive)	1.72797
arrest-policeman-man	36	Transitive (two participants)	Aligned (transitive)	3.36486
arrest-policeman-man	43	Transitive (two participants)	Non-aligned (transitive)	3.74651
arrest-policeman-man	44	Transitive (two participants)	Aligned (transitive)	1.86789
arrest-policeman-man	18	Transitive (two participants)	Aligned (transitive)	1.6651
arrest-policeman-man	6	Transitive (two participants)	Aligned (transitive)	1.23266
arrest-policeman-man	42	Transitive (two participants)	Aligned (transitive)	2.04098
arrest-policeman-man	30	Transitive (two participants)	Aligned (transitive)	2.25581
arrest-policeman-man	47	Transitive (two participants)	Non-aligned (transitive)	3.19959
arrest-policeman-man	45	Transitive (two participants)	Non-aligned (transitive)	5.64041
arrest-policeman-man	20	Transitive (two participants)	Aligned (transitive)	1.03078
arrest-policeman-man	17	Transitive (two participants)	Non-aligned (transitive)	1.49611
arrest-policeman-man	41	Transitive (two participants)	Non-aligned (transitive)	4.40894
arrest-policeman-man	37	Transitive (two participants)	Non-aligned (transitive)	1.42971
arrest-policeman-man	23	Transitive (two participants)	Non-aligned (transitive)	2.13794
arrest-policeman-man	40	Transitive (two participants)	Aligned (transitive)	4.12605
arrest-policeman-man	27	Transitive (two participants)	Non-aligned (transitive)	1.98142
arrest-policeman-man	33	Transitive (two participants)	Non-aligned (transitive)	1.98804
arrest-policeman-man	3	Transitive (two participants)	Non-aligned (transitive)	1.77197
arrest-policeman-man	10	Transitive (two participants)	Aligned (transitive)	1.12378
arrest-policeman-man	46	Transitive (two participants)	Aligned (transitive)	5.17419
arrest-policeman-man	49	Transitive (two participants)	Non-aligned (transitive)	1.85032
arrest-policeman-man	19	Transitive (two participants)	Non-aligned (transitive)	3.37114
arrest-policeman-man	32	Transitive (two participants)	Aligned (transitive)	2.91327
arrest-policeman-man	11	Transitive (two participants)	Non-aligned (transitive)	1.97811
arrest-policeman-man	35	Transitive (two participants)	Non-aligned (transitive)	2.63027
arrest-policeman-man	29	Transitive (two participants)	Non-aligned (transitive)	3.1499
arrest-policeman-man	22	Transitive (two participants)	Aligned (transitive)	4.45703
arrest-policeman-man	13	Transitive (two participants)	Non-aligned (transitive)	1.70331
arrest-policeman-man	9	Transitive (two participants)	Non-aligned (transitive)	1.58762
arrest-policeman-man	5	Transitive (two participants)	Non-aligned (transitive)	2.57006
arrest-policeman-man	2	Transitive (two participants)	Aligned (transitive)	1.49997
arrest-policeman-man	34	Transitive (two participants)	Aligned (transitive)	2.01997
arrive-train	3	Intransitive (one participant)	Non-aligned (intransitive)	2.50928
arrive-train	6	Intransitive (one participant)	Aligned (intransitive)	1.57766
arrive-train	11	Intransitive (one participant)	Non-aligned (intransitive)	1.9019
arrive-train	34	Intransitive (one participant)	Aligned (intransitive)	2.91805
arrive-train	31	Intransitive (one participant)	Non-aligned (intransitive)	3.94361
arrive-train	18	Intransitive (one participant)	Aligned (intransitive)	1.84711
arrive-train	40	Intransitive (one participant)	Aligned (intransitive)	2.48734
arrive-train	32	Intransitive (one participant)	Aligned (intransitive)	3.86557
arrive-train	39	Intransitive (one participant)	Non-aligned (intransitive)	3.672
arrive-train	43	Intransitive (one participant)	Non-aligned (intransitive)	1.56357
arrive-train	30	Intransitive (one participant)	Aligned (intransitive)	1.66542
arrive-train	15	Intransitive (one participant)	Non-aligned (intransitive)	2.1655
arrive-train	9	Intransitive (one participant)	Non-aligned (intransitive)	1.18204
arrive-train	48	Intransitive (one participant)	Aligned (intransitive)	2.67174
arrive-train	17	Intransitive (one participant)	Non-aligned (intransitive)	1.53477
arrive-train	35	Intransitive (one participant)	Non-aligned (intransitive)	1.63313
arrive-train	33	Intransitive (one participant)	Non-aligned (intransitive)	2.49771
arrive-train	46	Intransitive (one participant)	Aligned (intransitive)	2.6781
arrive-train	42	Intransitive (one participant)	Aligned (intransitive)	1.79584
arrive-train	26	Intransitive (one participant)	Aligned (intransitive)	1.2888
arrive-train	13	Intransitive (one participant)	Non-aligned (intransitive)	1.99649
arrive-train	37	Intransitive (one participant)	Non-aligned (intransitive)	2.88596
arrive-train	44	Intransitive (one participant)	Aligned (intransitive)	1.87733
arrive-train	16	Intransitive (one participant)	Aligned (intransitive)	1.30914
arrive-train	4	Intransitive (one participant)	Aligned (intransitive)	1.9449
arrive-train	45	Intransitive (one participant)	Non-aligned (intransitive)	4.38951
arrive-train	28	Intransitive (one participant)	Aligned (intransitive)	1.93991
arrive-train	36	Intransitive (one participant)	Aligned (intransitive)	2.77991
arrive-train	8	Intransitive (one participant)	Aligned (intransitive)	2.64714
arrive-train	38	Intransitive (one participant)	Aligned (intransitive)	1.60481
arrive-train	49	Intransitive (one participant)	Non-aligned (intransitive)	1.81505
arrive-train	20	Intransitive (one participant)	Aligned (intransitive)	1.15323
arrive-train	14	Intransitive (one participant)	Aligned (intransitive)	1.19694
arrive-train	10	Intransitive (one participant)	Aligned (intransitive)	1.3149
arrive-train	29	Intransitive (one participant)	Non-aligned (intransitive)	3.14563
arrive-train	2	Intransitive (one participant)	Aligned (intransitive)	1.67694
arrive-train	19	Intransitive (one participant)	Non-aligned (intransitive)	1.74166
arrive-train	12	Intransitive (one participant)	Aligned (intransitive)	2.04877
arrive-train	41	Intransitive (one participant)	Non-aligned (intransitive)	1.58576
arrive-train	23	Intransitive (one participant)	Non-aligned (intransitive)	1.89897
arrive-train	50	Intransitive (one participant)	Aligned (intransitive)	1.38782
arrive-train	24	Intransitive (one participant)	Aligned (intransitive)	1.49559
arrive-train	22	Intransitive (one participant)	Aligned (intransitive)	3.3306
arrive-train	5	Intransitive (one participant)	Non-aligned (intransitive)	2.43256
arrive-train	1	Intransitive (one participant)	Non-aligned (intransitive)	1.55245
bake-baker-bread	45	Transitive (two participants)	Non-aligned (transitive)	5.03961
bake-baker-bread	8	Transitive (two participants)	Aligned (transitive)	3.95382
bake-baker-bread	2	Transitive (two participants)	Aligned (transitive)	3.07691
bake-baker-bread	49	Transitive (two participants)	Non-aligned (transitive)	2.2734
bake-baker-bread	29	Transitive (two participants)	Non-aligned (transitive)	2.83384
bake-baker-bread	46	Transitive (two participants)	Aligned (transitive)	3.78475
bake-baker-bread	25	Transitive (two participants)	Non-aligned (transitive)	2.30894
bake-baker-bread	35	Transitive (two participants)	Non-aligned (transitive)	2.789
bake-baker-bread	16	Transitive (two participants)	Aligned (transitive)	3.28894
bake-baker-bread	33	Transitive (two participants)	Non-aligned (transitive)	1.63711
bake-baker-bread	24	Transitive (two participants)	Aligned (transitive)	1.65518
bake-baker-bread	20	Transitive (two participants)	Aligned (transitive)	1.8168
bake-baker-bread	37	Transitive (two participants)	Non-aligned (transitive)	3.81579
bake-baker-bread	13	Transitive (two participants)	Non-aligned (transitive)	2.17995
bake-baker-bread	48	Transitive (two participants)	Aligned (transitive)	3.98385
bake-baker-bread	21	Transitive (two participants)	Non-aligned (transitive)	4.23435
bake-baker-bread	4	Transitive (two participants)	Aligned (transitive)	4.62453
bake-baker-bread	14	Transitive (two participants)	Aligned (transitive)	2.66789
bake-baker-bread	47	Transitive (two participants)	Non-aligned (transitive)	2.09004
bake-baker-bread	50	Transitive (two participants)	Aligned (transitive)	2.35853
bake-baker-bread	30	Transitive (two participants)	Aligned (transitive)	2.67523
bake-baker-bread	32	Transitive (two participants)	Aligned (transitive)	3.91515
bake-baker-bread	18	Transitive (two participants)	Aligned (transitive)	1.41296
bake-baker-bread	10	Transitive (two participants)	Aligned (transitive)	3.1418
bake-baker-bread	34	Transitive (two participants)	Aligned (transitive)	2.29242
bake-baker-bread	15	Transitive (two participants)	Non-aligned (transitive)	2.69704
bake-baker-bread	12	Transitive (two participants)	Aligned (transitive)	4.20913
bake-baker-bread	1	Transitive (two participants)	Non-aligned (transitive)	2.31515
bake-baker-bread	43	Transitive (two participants)	Non-aligned (transitive)	4.40127
bake-baker-bread	22	Transitive (two participants)	Aligned (transitive)	4.7693
balance-tightropewalker	49	Intransitive (one participant)	Non-aligned (intransitive)	1.77658
balance-tightropewalker	22	Intransitive (one participant)	Aligned (intransitive)	2.41954
balance-tightropewalker	17	Intransitive (one participant)	Non-aligned (intransitive)	2.38495
balance-tightropewalker	33	Intransitive (one participant)	Non-aligned (intransitive)	2.06962
balance-tightropewalker	27	Intransitive (one participant)	Non-aligned (intransitive)	3.87519
balance-tightropewalker	24	Intransitive (one participant)	Aligned (intransitive)	1.30494
balance-tightropewalker	20	Intransitive (one participant)	Aligned (intransitive)	2.0132
balance-tightropewalker	39	Intransitive (one participant)	Non-aligned (intransitive)	5.23495
balance-tightropewalker	50	Intransitive (one participant)	Aligned (intransitive)	1.90283
balance-tightropewalker	9	Intransitive (one participant)	Non-aligned (intransitive)	1.43276
balance-tightropewalker	48	Intransitive (one participant)	Aligned (intransitive)	3.1983
balance-tightropewalker	47	Intransitive (one participant)	Non-aligned (intransitive)	2.68074
balance-tightropewalker	43	Intransitive (one participant)	Non-aligned (intransitive)	2.39973
balance-tightropewalker	10	Intransitive (one participant)	Aligned (intransitive)	1.86971
balance-tightropewalker	37	Intransitive (one participant)	Non-aligned (intransitive)	2.7362
balance-tightropewalker	41	Intransitive (one participant)	Non-aligned (intransitive)	1.64992
balance-tightropewalker	44	Intransitive (one participant)	Aligned (intransitive)	1.92117
balance-tightropewalker	30	Intransitive (one participant)	Aligned (intransitive)	2.16063
balance-tightropewalker	14	Intransitive (one participant)	Aligned (intransitive)	4.35255
balance-tightropewalker	38	Intransitive (one participant)	Aligned (intransitive)	4.55389
balance-tightropewalker	1	Intransitive (one participant)	Non-aligned (intransitive)	1.75499
balance-tightropewalker	16	Intransitive (one participant)	Aligned (intransitive)	2.02635
balance-tightropewalker	6	Intransitive (one participant)	Aligned (intransitive)	1.67294
balance-tightropewalker	26	Intransitive (one participant)	Aligned (intransitive)	1.36069
balance-tightropewalker	34	Intransitive (one participant)	Aligned (intransitive)	1.61974
balance-tightropewalker	3	Intransitive (one participant)	Non-aligned (intransitive)	4.03921
balance-tightropewalker	25	Intransitive (one participant)	Non-aligned (intransitive)	3.5607
bark-dog	43	Intransitive (one participant)	Non-aligned (intransitive)	1.45378
bark-dog	48	Intransitive (one participant)	Aligned (intransitive)	1.27323
bark-dog	9	Intransitive (one participant)	Non-aligned (intransitive)	1.25845
bark-dog	40	Intransitive (one participant)	Aligned (intransitive)	1.21414
bark-dog	35	Intransitive (one participant)	Non-aligned (intransitive)	1.3617
bark-dog	45	Intransitive (one participant)	Non-aligned (intransitive)	2.79822
bark-dog	21	Intransitive (one participant)	Non-aligned (intransitive)	1.70222
bark-dog	8	Intransitive (one participant)	Aligned (intransitive)	1.24766
bark-dog	22	Intransitive (one participant)	Aligned (intransitive)	2.40613
bark-dog	6	Intransitive (one participant)	Aligned (intransitive)	1.22906
bark-dog	20	Intransitive (one participant)	Aligned (intransitive)	0.901022
bark-dog	47	Intransitive (one participant)	Non-aligned (intransitive)	2.3961
bark-dog	29	Intransitive (one participant)	Non-aligned (intransitive)	3.93123
bark-dog	19	Intransitive (one participant)	Non-aligned (intransitive)	1.85549
bark-dog	36	Intransitive (one participant)	Aligned (intransitive)	1.925
bark-dog	15	Intransitive (one participant)	Non-aligned (intransitive)	1.37726
bark-dog	37	Intransitive (one participant)	Non-aligned (intransitive)	2.41394
bark-dog	27	Intransitive (one participant)	Non-aligned (intransitive)	3.42434
bark-dog	38	Intransitive (one participant)	Aligned (intransitive)	2.66236
bark-dog	44	Intransitive (one participant)	Aligned (intransitive)	1.22138
bark-dog	23	Intransitive (one participant)	Non-aligned (intransitive)	2.91163
bark-dog	7	Intransitive (one participant)	Non-aligned (intransitive)	1.73027
bark-dog	34	Intransitive (one participant)	Aligned (intransitive)	1.28428
bark-dog	26	Intransitive (one participant)	Aligned (intransitive)	2.02161
bark-dog	24	Intransitive (one participant)	Aligned (intransitive)	1.38111
bark-dog	4	Intransitive (one participant)	Aligned (intransitive)	1.78535
bark-dog	5	Intransitive (one participant)	Non-aligned (intransitive)	1.85666
bark-dog	31	Intransitive (one participant)	Non-aligned (intransitive)	2.98801
bark-dog	12	Intransitive (one participant)	Aligned (intransitive)	1.36885
bark-dog	46	Intransitive (one participant)	Aligned (intransitive)	3.66515
bark-dog	18	Intransitive (one participant)	Aligned (intransitive)	2.48165
bark-dog	30	Intransitive (one participant)	Aligned (intransitive)	1.34245
bark-dog	14	Intransitive (one participant)	Aligned (intransitive)	1.36456
bark-dog	11	Intransitive (one participant)	Non-aligned (intransitive)	1.31083
bark-dog	2	Intransitive (one participant)	Aligned (intransitive)	1.49351
bark-dog	13	Intransitive (one participant)	Non-aligned (intransitive)	2.21297
bark-dog	17	Intransitive (one participant)	Non-aligned (intransitive)	1.16702
bark-dog	50	Intransitive (one participant)	Aligned (intransitive)	1.4563
bark-dog	3	Intransitive (one participant)	Non-aligned (intransitive)	1.56758
bark-dog	1	Intransitive (one participant)	Non-aligned (intransitive)	1.29452
bark-dog	32	Intransitive (one participant)	Aligned (intransitive)	1.35805
bark-dog	39	Intransitive (one participant)	Non-aligned (intransitive)	2.15791
bark-dog	42	Intransitive (one participant)	Aligned (intransitive)	1.3137
bark-dog	41	Intransitive (one participant)	Non-aligned (intransitive)	1.97199
bark-dog	16	Intransitive (one participant)	Aligned (intransitive)	1.65918
bathing-mother-baby	1	Transitive (two participants)	Non-aligned (transitive)	1.79576
bathing-mother-baby	32	Transitive (two participants)	Aligned (transitive)	1.60872
bathing-mother-baby	8	Transitive (two participants)	Aligned (transitive)	1.44956
bathing-mother-baby	42	Transitive (two participants)	Aligned (transitive)	2.5012
bathing-mother-baby	45	Transitive (two participants)	Non-aligned (transitive)	3.7486
bathing-mother-baby	4	Transitive (two participants)	Aligned (transitive)	2.28638
bathing-mother-baby	14	Transitive (two participants)	Aligned (transitive)	2.64316
bathing-mother-baby	34	Transitive (two participants)	Aligned (transitive)	1.80193
bathing-mother-baby	37	Transitive (two participants)	Non-aligned (transitive)	1.57009
bathing-mother-baby	24	Transitive (two participants)	Aligned (transitive)	1.77132
bathing-mother-baby	29	Transitive (two participants)	Non-aligned (transitive)	2.96043
bathing-mother-baby	13	Transitive (two participants)	Non-aligned (transitive)	2.95399
bathing-mother-baby	18	Transitive (two participants)	Aligned (transitive)	3.0708
bathing-mother-baby	20	Transitive (two participants)	Aligned (transitive)	1.1968
bathing-mother-baby	43	Transitive (two participants)	Non-aligned (transitive)	2.6317
bathing-mother-baby	15	Transitive (two participants)	Non-aligned (transitive)	2.1517
bathing-mother-baby	41	Transitive (two participants)	Non-aligned (transitive)	4.0258
bathing-mother-baby	6	Transitive (two participants)	Aligned (transitive)	1.40108
bathing-mother-baby	12	Transitive (two participants)	Aligned (transitive)	2.13495
bathing-mother-baby	10	Transitive (two participants)	Aligned (transitive)	1.61234
bathing-mother-baby	44	Transitive (two participants)	Aligned (transitive)	2.27136
bathing-mother-baby	22	Transitive (two participants)	Aligned (transitive)	1.91832
bathing-mother-baby	50	Transitive (two participants)	Aligned (transitive)	1.68075
bathing-mother-baby	47	Transitive (two participants)	Non-aligned (transitive)	4.84667
bathing-mother-baby	38	Transitive (two participants)	Aligned (transitive)	2.5923
bathing-mother-baby	16	Transitive (two participants)	Aligned (transitive)	1.75806
bathing-mother-baby	48	Transitive (two participants)	Aligned (transitive)	2.20651
bathing-mother-baby	49	Transitive (two participants)	Non-aligned (transitive)	2.08992
bathing-mother-baby	3	Transitive (two participants)	Non-aligned (transitive)	1.7922
bathing-mother-baby	35	Transitive (two participants)	Non-aligned (transitive)	3.626
bathing-mother-baby	36	Transitive (two participants)	Aligned (transitive)	2.80573
bathing-mother-baby	40	Transitive (two participants)	Aligned (transitive)	3.41898
bathing-mother-baby	26	Transitive (two participants)	Aligned (transitive)	1.55973
bathing-mother-baby	27	Transitive (two participants)	Non-aligned (transitive)	3.36782
bathing-mother-baby	28	Transitive (two participants)	Aligned (transitive)	1.74108
bathing-mother-baby	33	Transitive (two participants)	Non-aligned (transitive)	1.96138
bathing-mother-baby	46	Transitive (two participants)	Aligned (transitive)	3.55893
bathing-mother-baby	30	Transitive (two participants)	Aligned (transitive)	1.73171
bathing-mother-baby	2	Transitive (two participants)	Aligned (transitive)	1.48546
bathing-mother-baby	17	Transitive (two participants)	Non-aligned (transitive)	1.88944
bite-bug-mouse	16	Transitive (two participants)	Aligned (transitive)	3.26439
bite-bug-mouse	24	Transitive (two participants)	Aligned (transitive)	1.79863
bite-bug-mouse	27	Transitive (two participants)	Non-aligned (transitive)	3.02854
bite-bug-mouse	13	Transitive (two participants)	Non-aligned (transitive)	3.32418
bite-bug-mouse	34	Transitive (two participants)	Aligned (transitive)	1.56385
bite-bug-mouse	8	Transitive (two participants)	Aligned (transitive)	2.06672
bite-bug-mouse	32	Transitive (two participants)	Aligned (transitive)	2.44928
bite-bug-mouse	10	Transitive (two participants)	Aligned (transitive)	2.60559
bite-bug-mouse	18	Transitive (two participants)	Aligned (transitive)	2.97959
bite-bug-mouse	19	Transitive (two participants)	Non-aligned (transitive)	2.8986
bite-bug-mouse	12	Transitive (two participants)	Aligned (transitive)	4.25321
bite-bug-mouse	17	Transitive (two participants)	Non-aligned (transitive)	1.68196
bite-bug-mouse	29	Transitive (two participants)	Non-aligned (transitive)	3.39509
bite-bug-mouse	40	Transitive (two participants)	Aligned (transitive)	2.62165
bite-bug-mouse	36	Transitive (two participants)	Aligned (transitive)	4.22683
bite-bug-mouse	3	Transitive (two participants)	Non-aligned (transitive)	5.04839
bite-bug-mouse	15	Transitive (two participants)	Non-aligned (transitive)	2.8244
bite-bug-mouse	48	Transitive (two participants)	Aligned (transitive)	4.89465
bite-bug-mouse	26	Transitive (two participants)	Aligned (transitive)	1.94762
bite-bug-mouse	42	Transitive (two participants)	Aligned (transitive)	3.76738
bite-bug-mouse	38	Transitive (two participants)	Aligned (transitive)	4.6493
bite-bug-mouse	37	Transitive (two participants)	Non-aligned (transitive)	2.3384
bite-bug-mouse	22	Transitive (two participants)	Aligned (transitive)	5.28264
bite-bug-mouse	49	Transitive (two participants)	Non-aligned (transitive)	2.20494
bite-bug-mouse	44	Transitive (two participants)	Aligned (transitive)	3.54125
bite-bug-mouse	4	Transitive (two participants)	Aligned (transitive)	4.08367
bite-bug-mouse	46	Transitive (two participants)	Aligned (transitive)	4.99826
bite-bug-mouse	28	Transitive (two participants)	Aligned (transitive)	2.32779
bite-bug-mouse	33	Transitive (two participants)	Non-aligned (transitive)	3.48137
bite-dog-man	17	Transitive (two participants)	Non-aligned (transitive)	1.36281
bite-dog-man	23	Transitive (two participants)	Non-aligned (transitive)	2.0075
bite-dog-man	3	Transitive (two participants)	Non-aligned (transitive)	2.00346
bite-dog-man	19	Transitive (two participants)	Non-aligned (transitive)	1.67332
bite-dog-man	36	Transitive (two participants)	Aligned (transitive)	3.39693
bite-dog-man	29	Transitive (two participants)	Non-aligned (transitive)	3.90161
bite-dog-man	11	Transitive (two participants)	Non-aligned (transitive)	2.88436
bite-dog-man	1	Transitive (two participants)	Non-aligned (transitive)	2.32048
bite-dog-man	27	Transitive (two participants)	Non-aligned (transitive)	2.19166
bite-dog-man	25	Transitive (two participants)	Non-aligned (transitive)	2.51412
bite-dog-man	22	Transitive (two participants)	Aligned (transitive)	2.60645
bite-dog-man	21	Transitive (two participants)	Non-aligned (transitive)	1.88578
bite-dog-man	41	Transitive (two participants)	Non-aligned (transitive)	3.38178
bite-dog-man	33	Transitive (two participants)	Non-aligned (transitive)	2.42367
bite-dog-man	45	Transitive (two participants)	Non-aligned (transitive)	3.11564
bite-dog-man	43	Transitive (two participants)	Non-aligned (transitive)	3.7462
bite-dog-man	35	Transitive (two participants)	Non-aligned (transitive)	1.50762
bite-dog-man	42	Transitive (two participants)	Aligned (transitive)	1.45547
bite-dog-man	38	Transitive (two participants)	Aligned (transitive)	2.40278
bite-dog-man	28	Transitive (two participants)	Aligned (transitive)	1.79932
bite-dog-man	13	Transitive (two participants)	Non-aligned (transitive)	2.03803
bite-dog-man	15	Transitive (two participants)	Non-aligned (transitive)	2.75411
bite-dog-man	37	Transitive (two participants)	Non-aligned (transitive)	2.75937
bite-dog-man	49	Transitive (two participants)	Non-aligned (transitive)	1.74064
bite-dog-man	20	Transitive (two participants)	Aligned (transitive)	1.33206
bite-dog-man	9	Transitive (two participants)	Non-aligned (transitive)	1.75661
bite-dog-man	24	Transitive (two participants)	Aligned (transitive)	1.72677
bite-dog-man	30	Transitive (two participants)	Aligned (transitive)	1.9197
bite-dog-man	40	Transitive (two participants)	Aligned (transitive)	2.56227
bite-dog-man	44	Transitive (two participants)	Aligned (transitive)	2.16688
bite-dog-man	50	Transitive (two participants)	Aligned (transitive)	2.60162
bite-dog-man	34	Transitive (two participants)	Aligned (transitive)	1.85372
bite-dog-man	8	Transitive (two participants)	Aligned (transitive)	2.59563
blowout-girl-candle	42	Transitive (two participants)	Aligned (transitive)	1.62166
blowout-girl-candle	32	Transitive (two participants)	Aligned (transitive)	2.5808
blowout-girl-candle	40	Transitive (two participants)	Aligned (transitive)	3.03899
blowout-girl-candle	15	Transitive (two participants)	Non-aligned (transitive)	1.82132
blowout-girl-candle	46	Transitive (two participants)	Aligned (transitive)	3.62424
blowout-girl-candle	37	Transitive (two participants)	Non-aligned (transitive)	1.91403
blowout-girl-candle	36	Transitive (two participants)	Aligned (transitive)	2.02759
blowout-girl-candle	38	Transitive (two participants)	Aligned (transitive)	2.96733
blowout-girl-candle	30	Transitive (two participants)	Aligned (transitive)	1.70856
blowout-girl-candle	20	Transitive (two participants)	Aligned (transitive)	1.22896
blowout-girl-candle	8	Transitive (two participants)	Aligned (transitive)	2.06159
blowout-girl-candle	6	Transitive (two participants)	Aligned (transitive)	1.7172
blowout-girl-candle	28	Transitive (two participants)	Aligned (transitive)	2.02369
blowout-girl-candle	14	Transitive (two participants)	Aligned (transitive)	1.58798
blowout-girl-candle	3	Transitive (two participants)	Non-aligned (transitive)	2.96962
blowout-girl-candle	21	Transitive (two participants)	Non-aligned (transitive)	2.56628
blowout-girl-candle	13	Transitive (two participants)	Non-aligned (transitive)	2.43057
blowout-girl-candle	26	Transitive (two participants)	Aligned (transitive)	1.4076
blowout-girl-candle	29	Transitive (two participants)	Non-aligned (transitive)	2.20016
blowout-girl-candle	18	Transitive (two participants)	Aligned (transitive)	1.3565
blowout-girl-candle	49	Transitive (two participants)	Non-aligned (transitive)	2.03531
blowout-girl-candle	1	Transitive (two participants)	Non-aligned (transitive)	2.66773
blowout-girl-candle	12	Transitive (two participants)	Aligned (transitive)	2.10309
blowout-girl-candle	22	Transitive (two participants)	Aligned (transitive)	2.80121
blowout-girl-candle	5	Transitive (two participants)	Non-aligned (transitive)	2.93963
blowout-girl-candle	27	Transitive (two participants)	Non-aligned (transitive)	3.00341
blowout-girl-candle	4	Transitive (two participants)	Aligned (transitive)	1.81384
blowout-girl-candle	7	Transitive (two participants)	Non-aligned (transitive)	1.85913
blowout-girl-candle	35	Transitive (two participants)	Non-aligned (transitive)	2.36577
blowout-girl-candle	16	Transitive (two participants)	Aligned (transitive)	1.69202
blowout-girl-candle	24	Transitive (two participants)	Aligned (transitive)	1.63524
blowout-girl-candle	34	Transitive (two participants)	Aligned (transitive)	1.17897
blowout-girl-candle	41	Transitive (two participants)	Non-aligned (transitive)	4.30228
blowout-girl-candle	33	Transitive (two participants)	Non-aligned (transitive)	2.78709
blowout-girl-candle	10	Transitive (two participants)	Aligned (transitive)	1.39874
blowout-girl-candle	2	Transitive (two participants)	Aligned (transitive)	1.36551
blowout-girl-candle	44	Transitive (two participants)	Aligned (transitive)	2.86089
blowout-girl-candle	43	Transitive (two participants)	Non-aligned (transitive)	2.09505
blowout-girl-candle	39	Transitive (two participants)	Non-aligned (transitive)	4.07278
blowout-girl-candle	50	Transitive (two participants)	Aligned (transitive)	2.37911
blowout-girl-candle	11	Transitive (two participants)	Non-aligned (transitive)	2.13403
blowout-girl-candle	17	Transitive (two participants)	Non-aligned (transitive)	1.61713
blowout-girl-candle	25	Transitive (two participants)	Non-aligned (transitive)	1.8859
break-girl-branch	10	Transitive (two participants)	Aligned (transitive)	1.23739
break-girl-branch	1	Transitive (two participants)	Non-aligned (transitive)	1.44669
break-girl-branch	49	Transitive (two participants)	Non-aligned (transitive)	1.45042
break-girl-branch	5	Transitive (two participants)	Non-aligned (transitive)	2.36635
break-girl-branch	16	Transitive (two participants)	Aligned (transitive)	1.54043
break-girl-branch	48	Transitive (two participants)	Aligned (transitive)	2.18235
break-girl-branch	46	Transitive (two participants)	Aligned (transitive)	4.40112
break-girl-branch	45	Transitive (two participants)	Non-aligned (transitive)	3.96808
break-girl-branch	39	Transitive (two participants)	Non-aligned (transitive)	5.34659
break-girl-branch	24	Transitive (two participants)	Aligned (transitive)	2.11791
break-girl-branch	14	Transitive (two participants)	Aligned (transitive)	1.66912
break-girl-branch	20	Transitive (two participants)	Aligned (transitive)	0.975723
break-girl-branch	8	Transitive (two participants)	Aligned (transitive)	1.81898
break-girl-branch	40	Transitive (two participants)	Aligned (transitive)	1.96706
break-girl-branch	2	Transitive (two participants)	Aligned (transitive)	1.58644
break-girl-branch	13	Transitive (two participants)	Non-aligned (transitive)	3.16301
break-girl-branch	34	Transitive (two participants)	Aligned (transitive)	2.21297
break-girl-branch	36	Transitive (two participants)	Aligned (transitive)	2.56536
break-girl-branch	43	Transitive (two participants)	Non-aligned (transitive)	2.43967
break-girl-branch	44	Transitive (two participants)	Aligned (transitive)	1.57054
break-girl-branch	15	Transitive (two participants)	Non-aligned (transitive)	2.65787
break-girl-branch	12	Transitive (two participants)	Aligned (transitive)	2.89655
break-girl-branch	38	Transitive (two participants)	Aligned (transitive)	2.56541
break-girl-branch	9	Transitive (two participants)	Non-aligned (transitive)	1.89107
break-girl-branch	27	Transitive (two participants)	Non-aligned (transitive)	3.61531
break-girl-branch	17	Transitive (two participants)	Non-aligned (transitive)	1.48447
break-girl-branch	35	Transitive (two participants)	Non-aligned (transitive)	2.11861
break-girl-branch	42	Transitive (two participants)	Aligned (transitive)	2.19774
break-girl-branch	50	Transitive (two participants)	Aligned (transitive)	1.92774
break-girl-branch	28	Transitive (two participants)	Aligned (transitive)	2.20705
break-woman-vase	12	Transitive (two participants)	Aligned (transitive)	4.28423
break-woman-vase	20	Transitive (two participants)	Aligned (transitive)	1.39501
break-woman-vase	29	Transitive (two participants)	Non-aligned (transitive)	2.91636
break-woman-vase	50	Transitive (two participants)	Aligned (transitive)	3.00444
break-woman-vase	40	Transitive (two participants)	Aligned (transitive)	3.37998
break-woman-vase	33	Transitive (two participants)	Non-aligned (transitive)	2.18326
break-woman-vase	23	Transitive (two participants)	Non-aligned (transitive)	2.19968
break-woman-vase	38	Transitive (two participants)	Aligned (transitive)	2.513
break-woman-vase	6	Transitive (two participants)	Aligned (transitive)	1.44193
break-woman-vase	2	Transitive (two participants)	Aligned (transitive)	2.09634
break-woman-vase	18	Transitive (two participants)	Aligned (transitive)	3.0607
break-woman-vase	24	Transitive (two participants)	Aligned (transitive)	2.2979
break-woman-vase	8	Transitive (two participants)	Aligned (transitive)	2.65268
break-woman-vase	19	Transitive (two participants)	Non-aligned (transitive)	2.734
break-woman-vase	37	Transitive (two participants)	Non-aligned (transitive)	2.05478
break-woman-vase	27	Transitive (two participants)	Non-aligned (transitive)	3.59215
break-woman-vase	7	Transitive (two participants)	Non-aligned (transitive)	2.59885
break-woman-vase	10	Transitive (two participants)	Aligned (transitive)	2.20408
break-woman-vase	22	Transitive (two participants)	Aligned (transitive)	5.34186
break-woman-vase	1	Transitive (two participants)	Non-aligned (transitive)	3.57457
break-woman-vase	11	Transitive (two participants)	Non-aligned (transitive)	2.39106
break-woman-vase	43	Transitive (two participants)	Non-aligned (transitive)	2.90848
break-woman-vase	4	Transitive (two participants)	Aligned (transitive)	3.93156
break-woman-vase	45	Transitive (two participants)	Non-aligned (transitive)	5.50146
break-woman-vase	36	Transitive (two participants)	Aligned (transitive)	2.68981
break-woman-vase	15	Transitive (two participants)	Non-aligned (transitive)	2.92099
break-woman-vase	5	Transitive (two participants)	Non-aligned (transitive)	3.41775
break-woman-vase	35	Transitive (two participants)	Non-aligned (transitive)	2.12082
break-woman-vase	49	Transitive (two participants)	Non-aligned (transitive)	3.17386
break-woman-vase	14	Transitive (two participants)	Aligned (transitive)	3.3173
break-woman-vase	16	Transitive (two participants)	Aligned (transitive)	2.28875
break-woman-vase	48	Transitive (two participants)	Aligned (transitive)	3.76351
break-woman-vase	39	Transitive (two participants)	Non-aligned (transitive)	4.13438
break-woman-vase	42	Transitive (two participants)	Aligned (transitive)	2.24835
break-woman-vase	25	Transitive (two participants)	Non-aligned (transitive)	2.23918
break-woman-vase	13	Transitive (two participants)	Non-aligned (transitive)	2.90296
break-woman-vase	9	Transitive (two participants)	Non-aligned (transitive)	1.52738
break-woman-vase	34	Transitive (two participants)	Aligned (transitive)	2.35077
break-woman-vase	17	Transitive (two participants)	Non-aligned (transitive)	2.14393
break-woman-vase	3	Transitive (two participants)	Non-aligned (transitive)	2.13405
breathe-whale	48	Intransitive (one participant)	Aligned (intransitive)	4.19991
breathe-whale	34	Intransitive (one participant)	Aligned (intransitive)	2.60569
breathe-whale	39	Intransitive (one participant)	Non-aligned (intransitive)	3.30531
breathe-whale	50	Intransitive (one participant)	Aligned (intransitive)	3.07515
breathe-whale	35	Intransitive (one participant)	Non-aligned (intransitive)	2.01647
breathe-whale	46	Intransitive (one participant)	Aligned (intransitive)	4.79335
breathe-whale	37	Intransitive (one participant)	Non-aligned (intransitive)	3.56511
breathe-whale	8	Intransitive (one participant)	Aligned (intransitive)	2.64972
breathe-whale	2	Intransitive (one participant)	Aligned (intransitive)	1.9929
breathe-whale	40	Intransitive (one participant)	Aligned (intransitive)	3.64016
breathe-whale	14	Intransitive (one participant)	Aligned (intransitive)	2.34939
breathe-whale	47	Intransitive (one participant)	Non-aligned (intransitive)	5.17335
breathe-whale	22	Intransitive (one participant)	Aligned (intransitive)	5.66032
breathe-whale	11	Intransitive (one participant)	Non-aligned (intransitive)	2.9007
breathe-whale	42	Intransitive (one participant)	Aligned (intransitive)	3.10212
breathe-whale	41	Intransitive (one participant)	Non-aligned (intransitive)	2.65761
breathe-whale	16	Intransitive (one participant)	Aligned (intransitive)	2.28917
breathe-whale	21	Intransitive (one participant)	Non-aligned (intransitive)	5.72242
breathe-whale	32	Intransitive (one participant)	Aligned (intransitive)	2.96898
breathe-whale	49	Intransitive (one participant)	Non-aligned (intransitive)	2.71576
breathe-whale	10	Intransitive (one participant)	Aligned (intransitive)	1.62142
breathe-whale	13	Intransitive (one participant)	Non-aligned (intransitive)	3.14733
breathe-whale	28	Intransitive (one participant)	Aligned (intransitive)	1.64058
breathe-whale	38	Intransitive (one participant)	Aligned (intransitive)	3.63562
breathe-whale	17	Intransitive (one participant)	Non-aligned (intransitive)	1.4625
breathe-whale	1	Intransitive (one participant)	Non-aligned (intransitive)	1.8627
breathe-whale	4	Intransitive (one participant)	Aligned (intransitive)	2.23877
breathe-whale	12	Intransitive (one participant)	Aligned (intransitive)	2.0977
breathe-whale	6	Intransitive (one participant)	Aligned (intransitive)	1.52847
breathe-whale	3	Intransitive (one participant)	Non-aligned (intransitive)	2.54321
breathe-whale	33	Intransitive (one participant)	Non-aligned (intransitive)	1.89923
breathe-whale	30	Intransitive (one participant)	Aligned (intransitive)	2.31206
breathe-whale	18	Intransitive (one participant)	Aligned (intransitive)	1.82415
breathe-whale	19	Intransitive (one participant)	Non-aligned (intransitive)	3.34996
breathe-whale	24	Intransitive (one participant)	Aligned (intransitive)	2.28655
breathe-whale	29	Intransitive (one participant)	Non-aligned (intransitive)	2.76292
breathe-whale	36	Intransitive (one participant)	Aligned (intransitive)	2.32176
breathe-whale	5	Intransitive (one participant)	Non-aligned (intransitive)	2.76383
breathe-whale	44	Intransitive (one participant)	Aligned (intransitive)	1.64723
brush-boy-trousers	1	Transitive (two participants)	Non-aligned (transitive)	2.27962
brush-boy-trousers	5	Transitive (two participants)	Non-aligned (transitive)	3.63365
brush-boy-trousers	12	Transitive (two participants)	Aligned (transitive)	2.90491
brush-boy-trousers	20	Transitive (two participants)	Aligned (transitive)	1.1711
brush-boy-trousers	3	Transitive (two participants)	Non-aligned (transitive)	3.64877
brush-boy-trousers	32	Transitive (two participants)	Aligned (transitive)	2.20257
brush-boy-trousers	25	Transitive (two participants)	Non-aligned (transitive)	2.76291
brush-boy-trousers	13	Transitive (two participants)	Non-aligned (transitive)	2.01822
brush-boy-trousers	24	Transitive (two participants)	Aligned (transitive)	1.54914
brush-boy-trousers	33	Transitive (two participants)	Non-aligned (transitive)	2.44458
brush-boy-trousers	22	Transitive (two participants)	Aligned (transitive)	2.46506
brush-boy-trousers	14	Transitive (two participants)	Aligned (transitive)	3.95726
brush-boy-trousers	35	Transitive (two participants)	Non-aligned (transitive)	2.74793
brush-boy-trousers	30	Transitive (two participants)	Aligned (transitive)	2.49177
brush-boy-trousers	19	Transitive (two participants)	Non-aligned (transitive)	3.54461
brush-boy-trousers	4	Transitive (two participants)	Aligned (transitive)	4.31595
brush-boy-trousers	48	Transitive (two participants)	Aligned (transitive)	3.1663
brush-boy-trousers	42	Transitive (two participants)	Aligned (transitive)	3.09204
brush-boy-trousers	47	Transitive (two participants)	Non-aligned (transitive)	3.48936
brush-boy-trousers	15	Transitive (two participants)	Non-aligned (transitive)	2.12804
brush-boy-trousers	16	Transitive (two participants)	Aligned (transitive)	1.52719
brush-boy-trousers	46	Transitive (two participants)	Aligned (transitive)	4.42817
brush-boy-trousers	2	Transitive (two participants)	Aligned (transitive)	1.93103
brush-boy-trousers	17	Transitive (two participants)	Non-aligned (transitive)	1.57137
brush-boy-trousers	18	Transitive (two participants)	Aligned (transitive)	3.27326
brush-boy-trousers	28	Transitive (two participants)	Aligned (transitive)	3.3815
brush-man-horse	11	Transitive (two participants)	Non-aligned (transitive)	1.90618
brush-man-horse	20	Transitive (two participants)	Aligned (transitive)	1.12447
brush-man-horse	2	Transitive (two participants)	Aligned (transitive)	1.48655
brush-man-horse	14	Transitive (two participants)	Aligned (transitive)	1.74007
brush-man-horse	42	Transitive (two participants)	Aligned (transitive)	1.82951
brush-man-horse	47	Transitive (two participants)	Non-aligned (transitive)	2.43382
brush-man-horse	34	Transitive (two participants)	Aligned (transitive)	1.61287
brush-man-horse	43	Transitive (two participants)	Non-aligned (transitive)	1.71273
brush-man-horse	32	Transitive (two participants)	Aligned (transitive)	1.56357
brush-man-horse	29	Transitive (two participants)	Non-aligned (transitive)	2.80606
brush-man-horse	33	Transitive (two participants)	Non-aligned (transitive)	1.62559
brush-man-horse	18	Transitive (two participants)	Aligned (transitive)	1.38601
brush-man-horse	10	Transitive (two participants)	Aligned (transitive)	1.39266
brush-man-horse	6	Transitive (two participants)	Aligned (transitive)	1.42674
brush-man-horse	26	Transitive (two participants)	Aligned (transitive)	2.19313
brush-man-horse	44	Transitive (two participants)	Aligned (transitive)	1.66405
brush-man-horse	31	Transitive (two participants)	Non-aligned (transitive)	4.48548
brush-man-horse	22	Transitive (two participants)	Aligned (transitive)	1.96135
brush-man-horse	25	Transitive (two participants)	Non-aligned (transitive)	2.21892
brush-man-horse	12	Transitive (two participants)	Aligned (transitive)	2.2075
brush-man-horse	36	Transitive (two participants)	Aligned (transitive)	1.78906
brush-man-horse	48	Transitive (two participants)	Aligned (transitive)	2.68323
brush-man-horse	17	Transitive (two participants)	Non-aligned (transitive)	2.17774
brush-man-horse	1	Transitive (two participants)	Non-aligned (transitive)	1.37423
brush-man-horse	8	Transitive (two participants)	Aligned (transitive)	1.65276
brush-man-horse	5	Transitive (two participants)	Non-aligned (transitive)	1.7456
brush-man-horse	50	Transitive (two participants)	Aligned (transitive)	1.94837
brush-man-horse	28	Transitive (two participants)	Aligned (transitive)	1.44644
brush-man-horse	49	Transitive (two participants)	Non-aligned (transitive)	2.83216
brush-man-horse	4	Transitive (two participants)	Aligned (transitive)	2.33636
brush-man-horse	35	Transitive (two participants)	Non-aligned (transitive)	2.00737
brush-man-horse	16	Transitive (two participants)	Aligned (transitive)	1.4879
brush-man-horse	37	Transitive (two participants)	Non-aligned (transitive)	2.21769
brush-man-horse	15	Transitive (two participants)	Non-aligned (transitive)	2.70724
brush-man-horse	24	Transitive (two participants)	Aligned (transitive)	1.42809
brush-man-horse	30	Transitive (two participants)	Aligned (transitive)	1.85764
brush-man-horse	40	Transitive (two participants)	Aligned (transitive)	2.54897
brush-man-horse	13	Transitive (two participants)	Non-aligned (transitive)	3.10352
brush-man-horse	38	Transitive (two participants)	Aligned (transitive)	1.80353
brush-man-horse	3	Transitive (two participants)	Non-aligned (transitive)	1.75386
build-bird-nest	13	Transitive (two participants)	Non-aligned (transitive)	2.9703
build-bird-nest	34	Transitive (two participants)	Aligned (transitive)	1.90242
build-bird-nest	20	Transitive (two participants)	Aligned (transitive)	1.15173
build-bird-nest	22	Transitive (two participants)	Aligned (transitive)	2.0567
build-bird-nest	43	Transitive (two participants)	Non-aligned (transitive)	2.60456
build-bird-nest	11	Transitive (two participants)	Non-aligned (transitive)	2.59304
build-bird-nest	27	Transitive (two participants)	Non-aligned (transitive)	2.27692
build-bird-nest	10	Transitive (two participants)	Aligned (transitive)	1.42967
build-bird-nest	9	Transitive (two participants)	Non-aligned (transitive)	1.76991
build-bird-nest	37	Transitive (two participants)	Non-aligned (transitive)	2.65558
build-bird-nest	23	Transitive (two participants)	Non-aligned (transitive)	2.99937
build-bird-nest	28	Transitive (two participants)	Aligned (transitive)	2.00034
build-bird-nest	4	Transitive (two participants)	Aligned (transitive)	3.32104
build-bird-nest	38	Transitive (two participants)	Aligned (transitive)	3.51027
build-bird-nest	39	Transitive (two participants)	Non-aligned (transitive)	3.85005
build-bird-nest	41	Transitive (two participants)	Non-aligned (transitive)	3.69619
build-bird-nest	35	Transitive (two participants)	Non-aligned (transitive)	1.88315
build-bird-nest	12	Transitive (two participants)	Aligned (transitive)	4.88836
build-bird-nest	5	Transitive (two participants)	Non-aligned (transitive)	2.8846
build-bird-nest	40	Transitive (two participants)	Aligned (transitive)	3.87559
build-bird-nest	32	Transitive (two participants)	Aligned (transitive)	3.16926
build-bird-nest	24	Transitive (two participants)	Aligned (transitive)	2.00352
build-bird-nest	18	Transitive (two participants)	Aligned (transitive)	2.17791
build-bird-nest	26	Transitive (two participants)	Aligned (transitive)	2.58524
build-bird-nest	17	Transitive (two participants)	Non-aligned (transitive)	1.61009
build-bird-nest	48	Transitive (two participants)	Aligned (transitive)	3.62626
build-bird-nest	1	Transitive (two participants)	Non-aligned (transitive)	3.31458
build-bird-nest	44	Transitive (two participants)	Aligned (transitive)	3.29918
build-bird-nest	49	Transitive (two participants)	Non-aligned (transitive)	2.58749
build-bird-nest	45	Transitive (two participants)	Non-aligned (transitive)	4.71171
build-bird-nest	50	Transitive (two participants)	Aligned (transitive)	2.32662
build-bird-nest	3	Transitive (two participants)	Non-aligned (transitive)	3.15489
build-bird-nest	16	Transitive (two participants)	Aligned (transitive)	2.65915
build-bird-nest	6	Transitive (two participants)	Aligned (transitive)	1.66335
build-bird-nest	47	Transitive (two participants)	Non-aligned (transitive)	2.56366
burst-balloon	23	Intransitive (one participant)	Non-aligned (intransitive)	2.4978
burst-balloon	32	Intransitive (one participant)	Aligned (intransitive)	1.85783
burst-balloon	26	Intransitive (one participant)	Aligned (intransitive)	1.69148
burst-balloon	16	Intransitive (one participant)	Aligned (intransitive)	2.2706
burst-balloon	1	Intransitive (one participant)	Non-aligned (intransitive)	1.81572
burst-balloon	14	Intransitive (one participant)	Aligned (intransitive)	3.37193
burst-balloon	30	Intransitive (one participant)	Aligned (intransitive)	1.68129
burst-balloon	9	Intransitive (one participant)	Non-aligned (intransitive)	1.5553
burst-balloon	39	Intransitive (one participant)	Non-aligned (intransitive)	2.68587
burst-balloon	36	Intransitive (one participant)	Aligned (intransitive)	3.21705
burst-balloon	38	Intransitive (one participant)	Aligned (intransitive)	3.14271
burst-balloon	33	Intransitive (one participant)	Non-aligned (intransitive)	2.46914
burst-balloon	44	Intransitive (one participant)	Aligned (intransitive)	2.35864
burst-balloon	25	Intransitive (one participant)	Non-aligned (intransitive)	3.76491
burst-balloon	28	Intransitive (one participant)	Aligned (intransitive)	2.19404
burst-balloon	48	Intransitive (one participant)	Aligned (intransitive)	1.5998
burst-balloon	49	Intransitive (one participant)	Non-aligned (intransitive)	2.83106
burst-balloon	13	Intransitive (one participant)	Non-aligned (intransitive)	3.2873
burst-balloon	6	Intransitive (one participant)	Aligned (intransitive)	1.78863
burst-balloon	10	Intransitive (one participant)	Aligned (intransitive)	3.0261
burst-balloon	24	Intransitive (one participant)	Aligned (intransitive)	2.65495
burst-balloon	20	Intransitive (one participant)	Aligned (intransitive)	1.16279
burst-balloon	11	Intransitive (one participant)	Non-aligned (intransitive)	1.96451
burst-balloon	45	Intransitive (one participant)	Non-aligned (intransitive)	4.92408
burst-balloon	22	Intransitive (one participant)	Aligned (intransitive)	2.03927
burst-balloon	4	Intransitive (one participant)	Aligned (intransitive)	4.9637
burst-balloon	3	Intransitive (one participant)	Non-aligned (intransitive)	1.64306
burst-balloon	35	Intransitive (one participant)	Non-aligned (intransitive)	1.98442
burst-balloon	21	Intransitive (one participant)	Non-aligned (intransitive)	2.10644
burst-balloon	40	Intransitive (one participant)	Aligned (intransitive)	2.30712
burst-balloon	41	Intransitive (one participant)	Non-aligned (intransitive)	2.96739
burst-balloon	18	Intransitive (one participant)	Aligned (intransitive)	1.49165
burst-balloon	37	Intransitive (one participant)	Non-aligned (intransitive)	2.24459
burst-balloon	42	Intransitive (one participant)	Aligned (intransitive)	2.40174
burst-balloon	5	Intransitive (one participant)	Non-aligned (intransitive)	1.70055
burst-balloon	12	Intransitive (one participant)	Aligned (intransitive)	4.43816
burst-balloon	46	Intransitive (one participant)	Aligned (intransitive)	3.6068
burst-balloon	34	Intransitive (one participant)	Aligned (intransitive)	1.2989
burst-balloon	50	Intransitive (one participant)	Aligned (intransitive)	2.56511
burst-balloon	43	Intransitive (one participant)	Non-aligned (intransitive)	2.12284
burst-balloon	7	Intransitive (one participant)	Non-aligned (intransitive)	2.22702
burst-balloon	19	Intransitive (one participant)	Non-aligned (intransitive)	2.21517
burst-balloon	29	Intransitive (one participant)	Non-aligned (intransitive)	4.38992
burst-balloon	17	Intransitive (one participant)	Non-aligned (intransitive)	1.36694
burst-balloon	31	Intransitive (one participant)	Non-aligned (intransitive)	3.36442
bury-man-coffin	18	Transitive (two participants)	Aligned (transitive)	2.20664
bury-man-coffin	22	Transitive (two participants)	Aligned (transitive)	1.70766
bury-man-coffin	21	Transitive (two participants)	Non-aligned (transitive)	2.23553
bury-man-coffin	43	Transitive (two participants)	Non-aligned (transitive)	2.10379
bury-man-coffin	7	Transitive (two participants)	Non-aligned (transitive)	1.89724
bury-man-coffin	32	Transitive (two participants)	Aligned (transitive)	3.12661
bury-man-coffin	14	Transitive (two participants)	Aligned (transitive)	3.90671
bury-man-coffin	33	Transitive (two participants)	Non-aligned (transitive)	1.99631
bury-man-coffin	39	Transitive (two participants)	Non-aligned (transitive)	3.59375
bury-man-coffin	2	Transitive (two participants)	Aligned (transitive)	2.11053
bury-man-coffin	24	Transitive (two participants)	Non-aligned (transitive)	2.36645
bury-man-coffin	23	Transitive (two participants)	Non-aligned (transitive)	2.22395
bury-man-coffin	13	Transitive (two participants)	Non-aligned (transitive)	2.95399
bury-man-coffin	6	Transitive (two participants)	Aligned (transitive)	1.47463
bury-man-coffin	16	Transitive (two participants)	Aligned (transitive)	1.71816
bury-man-coffin	5	Transitive (two participants)	Non-aligned (transitive)	2.51024
bury-man-coffin	3	Transitive (two participants)	Non-aligned (transitive)	4.5628
bury-man-coffin	11	Transitive (two participants)	Non-aligned (transitive)	1.83007
bury-man-coffin	10	Transitive (two participants)	Aligned (transitive)	1.23102
bury-man-coffin	4	Transitive (two participants)	Aligned (transitive)	2.17497
bury-man-coffin	20	Transitive (two participants)	Aligned (transitive)	0.998688
bury-man-coffin	19	Transitive (two participants)	Non-aligned (transitive)	1.86011
bury-man-coffin	30	Transitive (two participants)	Aligned (transitive)	2.15783
bury-man-coffin	8	Transitive (two participants)	Aligned (transitive)	4.22866
bury-man-coffin	12	Transitive (two participants)	Aligned (transitive)	3.35441
bury-man-coffin	1	Transitive (two participants)	Non-aligned (transitive)	2.60692
bury-man-coffin	35	Transitive (two participants)	Non-aligned (transitive)	2.15724
bury-man-coffin	36	Transitive (two participants)	Aligned (transitive)	2.73205
bury-man-coffin	9	Transitive (two participants)	Non-aligned (transitive)	1.60511
bury-man-coffin	40	Transitive (two participants)	Aligned (transitive)	4.39212
bury-man-coffin	50	Transitive (two participants)	Aligned (transitive)	2.65938
bury-man-coffin	17	Transitive (two participants)	Non-aligned (transitive)	1.48241
bury-man-coffin	15	Transitive (two participants)	Non-aligned (transitive)	3.6301
[truncated: 3,377 more rows]

[truncated: 2 more sheets: Fig S4, Fig S5]
