# Supplementary material for: Neural signatures of syntactic variation in speech planning
Source: PLOS journal article supplement (doi:10.1371/journal.pbio.3001038), 2021-01-26
Supplement: S6 (10.1371/journal.pbio.3001038.s006) [file journal.pbio.3001038.s006]

|                                                | Agent (Subject)                              | Patient (Object)                       | Verb                        | Apect             |              |
|------------------------------------------------|----------------------------------------------|----------------------------------------|-----------------------------|-------------------|--------------|
| intransitive,<br>one-<br>participant<br>events | <i>mālī</i> $\emptyset$<br>gardener NOM      |                                        | <i>jhukā</i><br>crouch:IPFV | <i>hai</i><br>AUX | imperfective |
|                                                |                                              | “The gardener crouches.”               |                             |                   |              |
|                                                | <i>mālī</i> $\emptyset$<br>gardener NOM      |                                        | <i>jhukā</i><br>crouch:PFV  | <i>thā</i><br>AUX | perfective   |
|                                                |                                              | “The gardener crouched.”               |                             |                   |              |
| transitive,<br>two-<br>participant<br>events   | <i>mālī</i> $\emptyset$<br>gardener NOM      | <i>paudhe</i> $\emptyset$<br>trees NOM | <i>lagātā</i><br>plant:IPFV | <i>hai</i><br>AUX | imperfective |
|                                                |                                              | “The gardener plants trees.”           |                             |                   |              |
|                                                | <i>mālī</i> <i>ne</i><br>gardener <b>ERG</b> | <i>paudhe</i> $\emptyset$<br>trees NOM | <i>lagāye</i><br>plant:PFV  | <i>the</i><br>AUX | perfective   |
|                                                |                                              | “The gardener planted trees.”          |                             |                   |              |

Table S1: Example sentences from Hindi illustrating the split-ergative case marking system. More literal translations are “The gardener is crouching / had crouched” and “The gardener is planting a tree / had planted a tree”. Sentence types were chosen so that the overall syntactic structure matched as much as possible across conditions and all sentences consisted of one or two noun phrases, a verb and an auxiliary. Abbreviations: AUX = auxiliary, ERG = ergative case, IPFV = imperfective aspect, NOM = nominative case, PFV = perfective aspect,  $\emptyset$  = null (phonologically empty) morpheme.
